# Supplementary material for: Causal splicing variants revealed by deep-learning integration of single-cell sQTL mapping under influenza infection
Source: Research Square preprint supplement (doi:10.21203/rs.3.rs-8408992/v1), 2026-01-06
Supplement: Supplementary file 1 [file 1287d0228ffc5bde9af1ff74.xlsx]

## Sheet: Uninfected
chr	BP	variant_id	group_id	gene_name	phenotype_id	A1	A2	tss_distance	af	ma_samples	ma_count	pval_nominal	slope	slope_se	min_pval_nominal	min_qval	pval_nominal_threshold
1	1498608	1:1498608:T:C	ENSG00000160072	ATAD3B	chr1:1485171:1485782:clu_26061_?:ENSG00000160072	C	T	26843	0.0729167	14	14	4.31295e-07	1.42782	0.261406	6.81486e-12	5.63656e-06	1.31691e-05
1	1498608	1:1498608:T:C	ENSG00000197785	ATAD3A	chr1:1485171:1485782:clu_26061_?:ENSG00000197785	C	T	-13554	0.0729167	14	14	4.31295e-07	1.42782	0.261406	6.81486e-12	1.13656e-05	9.99888e-06
1	1502301	1:1502301:G:A	ENSG00000197785	ATAD3A	chr1:1485171:1485782:clu_26061_?:ENSG00000197785	A	G	-9861	0.0572917	11	11	3.51698e-08	1.58948	0.26292	6.81486e-12	1.13656e-05	9.99888e-06
1	1502301	1:1502301:G:A	ENSG00000160072	ATAD3B	chr1:1485171:1485782:clu_26061_?:ENSG00000160072	A	G	30536	0.0572917	11	11	3.51698e-08	1.58948	0.26292	6.81486e-12	5.63656e-06	1.31691e-05
1	1503422	1:1503422:G:A	ENSG00000197785	ATAD3A	chr1:1485171:1485782:clu_26061_?:ENSG00000197785	A	G	-8740	0.0625	12	12	7.46816e-12	1.83812	0.23272	6.81486e-12	1.13656e-05	9.99888e-06
1	1503422	1:1503422:G:A	ENSG00000160072	ATAD3B	chr1:1485171:1485782:clu_26061_?:ENSG00000160072	A	G	31657	0.0625	12	12	7.46816e-12	1.83812	0.23272	6.81486e-12	5.63656e-06	1.31691e-05
1	1504191	1:1504191:G:T	ENSG00000160072	ATAD3B	chr1:1485171:1485782:clu_26061_?:ENSG00000160072	T	G	32426	0.0677083	13	13	9.39322e-09	1.5738	0.248065	6.81486e-12	5.63656e-06	1.31691e-05
1	1504191	1:1504191:G:T	ENSG00000197785	ATAD3A	chr1:1485171:1485782:clu_26061_?:ENSG00000197785	T	G	-7971	0.0677083	13	13	9.39322e-09	1.5738	0.248065	6.81486e-12	1.13656e-05	9.99888e-06
1	1505017	1:1505017:C:T	ENSG00000197785	ATAD3A	chr1:1485171:1485782:clu_26061_?:ENSG00000197785	T	C	-7145	0.0625	12	12	7.46816e-12	1.83812	0.23272	6.81486e-12	1.13656e-05	9.99888e-06
1	1505017	1:1505017:C:T	ENSG00000160072	ATAD3B	chr1:1485171:1485782:clu_26061_?:ENSG00000160072	T	C	33252	0.0625	12	12	7.46816e-12	1.83812	0.23272	6.81486e-12	5.63656e-06	1.31691e-05
1	1505170	1:1505170:T:C	ENSG00000197785	ATAD3A	chr1:1485171:1485782:clu_26061_?:ENSG00000197785	C	T	-6992	0.078125	15	15	3.69992e-07	1.38337	0.251592	6.81486e-12	1.13656e-05	9.99888e-06
1	1505170	1:1505170:T:C	ENSG00000160072	ATAD3B	chr1:1485171:1485782:clu_26061_?:ENSG00000160072	C	T	33405	0.078125	15	15	3.69992e-07	1.38337	0.251592	6.81486e-12	5.63656e-06	1.31691e-05
1	1506823	1:1506823:C:T	ENSG00000197785	ATAD3A	chr1:1485171:1485782:clu_26061_?:ENSG00000197785	T	C	-5339	0.078125	15	15	1.32409e-07	1.45399	0.253312	6.81486e-12	1.13656e-05	9.99888e-06
1	1506823	1:1506823:C:T	ENSG00000160072	ATAD3B	chr1:1485171:1485782:clu_26061_?:ENSG00000160072	T	C	35058	0.078125	15	15	1.32409e-07	1.45399	0.253312	6.81486e-12	5.63656e-06	1.31691e-05
1	1506823	1:1506823:C:T	ENSG00000197785	ATAD3A	chr1:1522899:1523511:clu_26061_?:ENSG00000197785	T	C	-5339	0.078125	15	15	2.94283e-06	-1.54843	0.309918	6.81486e-12	1.13656e-05	9.99888e-06
1	1506823	1:1506823:C:T	ENSG00000160072	ATAD3B	chr1:1522899:1523511:clu_26061_?:ENSG00000160072	T	C	35058	0.078125	15	15	2.94283e-06	-1.54843	0.309918	6.81486e-12	5.63656e-06	1.31691e-05
1	1510447	1:1510447:C:T	ENSG00000197785	ATAD3A	chr1:1485171:1485782:clu_26061_?:ENSG00000197785	T	C	-1715	0.0625	12	12	7.46816e-12	1.83812	0.23272	6.81486e-12	1.13656e-05	9.99888e-06
1	1510447	1:1510447:C:T	ENSG00000160072	ATAD3B	chr1:1485171:1485782:clu_26061_?:ENSG00000160072	T	C	38682	0.0625	12	12	7.46816e-12	1.83812	0.23272	6.81486e-12	5.63656e-06	1.31691e-05
1	1511010	1:1511010:G:T	ENSG00000197785	ATAD3A	chr1:1485171:1485782:clu_26061_?:ENSG00000197785	T	G	-1152	0.078125	15	15	1.23663e-06	1.30801	0.251107	6.81486e-12	1.13656e-05	9.99888e-06
1	1511010	1:1511010:G:T	ENSG00000160072	ATAD3B	chr1:1485171:1485782:clu_26061_?:ENSG00000160072	T	G	39245	0.078125	15	15	1.23663e-06	1.30801	0.251107	6.81486e-12	5.63656e-06	1.31691e-05
1	1511356	1:1511356:T:C	ENSG00000197785	ATAD3A	chr1:1485171:1485782:clu_26061_?:ENSG00000197785	C	T	-806	0.078125	15	15	1.23663e-06	1.30801	0.251107	6.81486e-12	1.13656e-05	9.99888e-06
1	1511356	1:1511356:T:C	ENSG00000160072	ATAD3B	chr1:1485171:1485782:clu_26061_?:ENSG00000160072	C	T	39591	0.078125	15	15	1.23663e-06	1.30801	0.251107	6.81486e-12	5.63656e-06	1.31691e-05
1	1511549	1:1511549:C:T	ENSG00000160072	ATAD3B	chr1:1485171:1485782:clu_26061_?:ENSG00000160072	T	C	39784	0.0729167	14	14	8.31097e-09	1.52926	0.240007	6.81486e-12	5.63656e-06	1.31691e-05
1	1511549	1:1511549:C:T	ENSG00000197785	ATAD3A	chr1:1485171:1485782:clu_26061_?:ENSG00000197785	T	C	-613	0.0729167	14	14	8.31097e-09	1.52926	0.240007	6.81486e-12	1.13656e-05	9.99888e-06
1	1511847	1:1511847:T:C	ENSG00000197785	ATAD3A	chr1:1485171:1485782:clu_26061_?:ENSG00000197785	C	T	-315	0.0833333	16	16	1.08303e-06	1.30717	0.249406	6.81486e-12	1.13656e-05	9.99888e-06
1	1511847	1:1511847:T:C	ENSG00000160072	ATAD3B	chr1:1485171:1485782:clu_26061_?:ENSG00000160072	C	T	40082	0.0833333	16	16	1.08303e-06	1.30717	0.249406	6.81486e-12	5.63656e-06	1.31691e-05
1	1512644	1:1512644:C:T	ENSG00000160072	ATAD3B	chr1:1485171:1485782:clu_26061_?:ENSG00000160072	T	C	40879	0.0625	12	12	7.46816e-12	1.83812	0.23272	6.81486e-12	5.63656e-06	1.31691e-05
1	1512644	1:1512644:C:T	ENSG00000197785	ATAD3A	chr1:1485171:1485782:clu_26061_?:ENSG00000197785	T	C	482	0.0625	12	12	7.46816e-12	1.83812	0.23272	6.81486e-12	1.13656e-05	9.99888e-06
1	1514910	1:1514910:G:A	ENSG00000197785	ATAD3A	chr1:1485171:1485782:clu_26061_?:ENSG00000197785	A	G	2748	0.0677083	13	13	5.13955e-10	1.67233	0.23935	6.81486e-12	1.13656e-05	9.99888e-06
1	1514910	1:1514910:G:A	ENSG00000160072	ATAD3B	chr1:1485171:1485782:clu_26061_?:ENSG00000160072	A	G	43145	0.0677083	13	13	5.13955e-10	1.67233	0.23935	6.81486e-12	5.63656e-06	1.31691e-05
1	1516561	1:1516561:C:T	ENSG00000197785	ATAD3A	chr1:1485171:1485782:clu_26061_?:ENSG00000197785	T	C	4399	0.0625	12	12	7.46816e-12	1.83812	0.23272	6.81486e-12	1.13656e-05	9.99888e-06
1	1516561	1:1516561:C:T	ENSG00000160072	ATAD3B	chr1:1485171:1485782:clu_26061_?:ENSG00000160072	T	C	44796	0.0625	12	12	7.46816e-12	1.83812	0.23272	6.81486e-12	5.63656e-06	1.31691e-05
1	1517343	1:1517343:C:T	ENSG00000197785	ATAD3A	chr1:1485171:1485782:clu_26061_?:ENSG00000197785	T	C	5181	0.0625	12	12	7.46816e-12	1.83812	0.23272	6.81486e-12	1.13656e-05	9.99888e-06
1	1517343	1:1517343:C:T	ENSG00000160072	ATAD3B	chr1:1485171:1485782:clu_26061_?:ENSG00000160072	T	C	45578	0.0625	12	12	7.46816e-12	1.83812	0.23272	6.81486e-12	5.63656e-06	1.31691e-05
1	1517796	1:1517796:G:A	ENSG00000160072	ATAD3B	chr1:1485171:1485782:clu_26061_?:ENSG00000160072	A	G	46031	0.0625	12	12	7.46816e-12	1.83812	0.23272	6.81486e-12	5.63656e-06	1.31691e-05
1	1517796	1:1517796:G:A	ENSG00000197785	ATAD3A	chr1:1485171:1485782:clu_26061_?:ENSG00000197785	A	G	5634	0.0625	12	12	7.46816e-12	1.83812	0.23272	6.81486e-12	1.13656e-05	9.99888e-06
1	1517819	1:1517819:G:A	ENSG00000197785	ATAD3A	chr1:1485171:1485782:clu_26061_?:ENSG00000197785	A	G	5657	0.0625	12	12	7.46816e-12	1.83812	0.23272	6.81486e-12	1.13656e-05	9.99888e-06
1	1517819	1:1517819:G:A	ENSG00000160072	ATAD3B	chr1:1485171:1485782:clu_26061_?:ENSG00000160072	A	G	46054	0.0625	12	12	7.46816e-12	1.83812	0.23272	6.81486e-12	5.63656e-06	1.31691e-05
1	1518112	1:1518112:C:T	ENSG00000197785	ATAD3A	chr1:1485171:1485782:clu_26061_?:ENSG00000197785	T	C	5950	0.0625	12	12	7.46816e-12	1.83812	0.23272	6.81486e-12	1.13656e-05	9.99888e-06
1	1518112	1:1518112:C:T	ENSG00000160072	ATAD3B	chr1:1485171:1485782:clu_26061_?:ENSG00000160072	T	C	46347	0.0625	12	12	7.46816e-12	1.83812	0.23272	6.81486e-12	5.63656e-06	1.31691e-05
1	1518758	1:1518758:G:A	ENSG00000197785	ATAD3A	chr1:1485171:1485782:clu_26061_?:ENSG00000197785	A	G	6596	0.0625	12	12	7.46816e-12	1.83812	0.23272	6.81486e-12	1.13656e-05	9.99888e-06
1	1518758	1:1518758:G:A	ENSG00000160072	ATAD3B	chr1:1485171:1485782:clu_26061_?:ENSG00000160072	A	G	46993	0.0625	12	12	7.46816e-12	1.83812	0.23272	6.81486e-12	5.63656e-06	1.31691e-05
1	1520031	1:1520031:T:G	ENSG00000160072	ATAD3B	chr1:1485171:1485782:clu_26061_?:ENSG00000160072	G	T	48266	0.0625	12	12	7.46816e-12	1.83812	0.23272	6.81486e-12	5.63656e-06	1.31691e-05
1	1520031	1:1520031:T:G	ENSG00000197785	ATAD3A	chr1:1485171:1485782:clu_26061_?:ENSG00000197785	G	T	7869	0.0625	12	12	7.46816e-12	1.83812	0.23272	6.81486e-12	1.13656e-05	9.99888e-06
1	1520398	1:1520398:T:G	ENSG00000160072	ATAD3B	chr1:1485171:1485782:clu_26061_?:ENSG00000160072	G	T	48633	0.0625	12	12	7.46816e-12	1.83812	0.23272	6.81486e-12	5.63656e-06	1.31691e-05
1	1520398	1:1520398:T:G	ENSG00000197785	ATAD3A	chr1:1485171:1485782:clu_26061_?:ENSG00000197785	G	T	8236	0.0625	12	12	7.46816e-12	1.83812	0.23272	6.81486e-12	1.13656e-05	9.99888e-06
1	1521029	1:1521029:C:T	ENSG00000197785	ATAD3A	chr1:1485171:1485782:clu_26061_?:ENSG00000197785	T	C	8867	0.0625	12	12	7.46816e-12	1.83812	0.23272	6.81486e-12	1.13656e-05	9.99888e-06
1	1521029	1:1521029:C:T	ENSG00000160072	ATAD3B	chr1:1485171:1485782:clu_26061_?:ENSG00000160072	T	C	49264	0.0625	12	12	7.46816e-12	1.83812	0.23272	6.81486e-12	5.63656e-06	1.31691e-05
1	1522545	1:1522545:G:A	ENSG00000160072	ATAD3B	chr1:1485171:1485782:clu_26061_?:ENSG00000160072	A	G	50780	0.0625	12	12	7.46816e-12	1.83812	0.23272	6.81486e-12	5.63656e-06	1.31691e-05
1	1522545	1:1522545:G:A	ENSG00000197785	ATAD3A	chr1:1485171:1485782:clu_26061_?:ENSG00000197785	A	G	10383	0.0625	12	12	7.46816e-12	1.83812	0.23272	6.81486e-12	1.13656e-05	9.99888e-06
1	1522548	1:1522548:G:A	ENSG00000160072	ATAD3B	chr1:1485171:1485782:clu_26061_?:ENSG00000160072	A	G	50783	0.0677083	12	13	1.99293e-09	1.46272	0.218661	6.81486e-12	5.63656e-06	1.31691e-05
1	1522548	1:1522548:G:A	ENSG00000197785	ATAD3A	chr1:1485171:1485782:clu_26061_?:ENSG00000197785	A	G	10386	0.0677083	12	13	1.99293e-09	1.46272	0.218661	6.81486e-12	1.13656e-05	9.99888e-06
1	1523535	1:1523535:C:T	ENSG00000197785	ATAD3A	chr1:1485171:1485782:clu_26061_?:ENSG00000197785	T	C	11373	0.0625	12	12	7.46816e-12	1.83812	0.23272	6.81486e-12	1.13656e-05	9.99888e-06
1	1523535	1:1523535:C:T	ENSG00000160072	ATAD3B	chr1:1485171:1485782:clu_26061_?:ENSG00000160072	T	C	51770	0.0625	12	12	7.46816e-12	1.83812	0.23272	6.81486e-12	5.63656e-06	1.31691e-05
1	1523564	1:1523564:C:T	ENSG00000197785	ATAD3A	chr1:1485171:1485782:clu_26061_?:ENSG00000197785	T	C	11402	0.0625	12	12	7.46816e-12	1.83812	0.23272	6.81486e-12	1.13656e-05	9.99888e-06
1	1523564	1:1523564:C:T	ENSG00000160072	ATAD3B	chr1:1485171:1485782:clu_26061_?:ENSG00000160072	T	C	51799	0.0625	12	12	7.46816e-12	1.83812	0.23272	6.81486e-12	5.63656e-06	1.31691e-05
1	1523727	1:1523727:G:C	ENSG00000160072	ATAD3B	chr1:1485171:1485782:clu_26061_?:ENSG00000160072	C	G	51962	0.0625	12	12	7.46816e-12	1.83812	0.23272	6.81486e-12	5.63656e-06	1.31691e-05
1	1523727	1:1523727:G:C	ENSG00000197785	ATAD3A	chr1:1485171:1485782:clu_26061_?:ENSG00000197785	C	G	11565	0.0625	12	12	7.46816e-12	1.83812	0.23272	6.81486e-12	1.13656e-05	9.99888e-06
1	1524001	1:1524001:G:A	ENSG00000197785	ATAD3A	chr1:1485171:1485782:clu_26061_?:ENSG00000197785	A	G	11839	0.0625	12	12	7.46816e-12	1.83812	0.23272	6.81486e-12	1.13656e-05	9.99888e-06
1	1524001	1:1524001:G:A	ENSG00000160072	ATAD3B	chr1:1485171:1485782:clu_26061_?:ENSG00000160072	A	G	52236	0.0625	12	12	7.46816e-12	1.83812	0.23272	6.81486e-12	5.63656e-06	1.31691e-05
1	1524141	1:1524141:G:A	ENSG00000197785	ATAD3A	chr1:1485171:1485782:clu_26061_?:ENSG00000197785	A	G	11979	0.0625	12	12	7.46816e-12	1.83812	0.23272	6.81486e-12	1.13656e-05	9.99888e-06
1	1524141	1:1524141:G:A	ENSG00000160072	ATAD3B	chr1:1485171:1485782:clu_26061_?:ENSG00000160072	A	G	52376	0.0625	12	12	7.46816e-12	1.83812	0.23272	6.81486e-12	5.63656e-06	1.31691e-05
1	1524750	1:1524750:C:G	ENSG00000197785	ATAD3A	chr1:1485171:1485782:clu_26061_?:ENSG00000197785	G	C	12588	0.0625	12	12	7.46816e-12	1.83812	0.23272	6.81486e-12	1.13656e-05	9.99888e-06
1	1524750	1:1524750:C:G	ENSG00000160072	ATAD3B	chr1:1485171:1485782:clu_26061_?:ENSG00000160072	G	C	52985	0.0625	12	12	7.46816e-12	1.83812	0.23272	6.81486e-12	5.63656e-06	1.31691e-05
1	1524938	1:1524938:T:G	ENSG00000197785	ATAD3A	chr1:1485171:1485782:clu_26061_?:ENSG00000197785	G	T	12776	0.140625	23	27	4.27086e-06	0.825973	0.168445	6.81486e-12	1.13656e-05	9.99888e-06
1	1524938	1:1524938:T:G	ENSG00000160072	ATAD3B	chr1:1485171:1485782:clu_26061_?:ENSG00000160072	G	T	53173	0.140625	23	27	4.27086e-06	0.825973	0.168445	6.81486e-12	5.63656e-06	1.31691e-05
1	1526453	1:1526453:C:G	ENSG00000160072	ATAD3B	chr1:1485171:1485782:clu_26061_?:ENSG00000160072	G	C	54688	0.0625	12	12	7.46816e-12	1.83812	0.23272	6.81486e-12	5.63656e-06	1.31691e-05
1	1526453	1:1526453:C:G	ENSG00000197785	ATAD3A	chr1:1485171:1485782:clu_26061_?:ENSG00000197785	G	C	14291	0.0625	12	12	7.46816e-12	1.83812	0.23272	6.81486e-12	1.13656e-05	9.99888e-06
1	1527951	1:1527951:A:G	ENSG00000197785	ATAD3A	chr1:1485171:1485782:clu_26061_?:ENSG00000197785	G	A	15789	0.0625	12	12	7.46816e-12	1.83812	0.23272	6.81486e-12	1.13656e-05	9.99888e-06
1	1527951	1:1527951:A:G	ENSG00000160072	ATAD3B	chr1:1485171:1485782:clu_26061_?:ENSG00000160072	G	A	56186	0.0625	12	12	7.46816e-12	1.83812	0.23272	6.81486e-12	5.63656e-06	1.31691e-05
1	1528517	1:1528517:A:G	ENSG00000160072	ATAD3B	chr1:1485171:1485782:clu_26061_?:ENSG00000160072	G	A	56752	0.0625	12	12	7.46816e-12	1.83812	0.23272	6.81486e-12	5.63656e-06	1.31691e-05
1	1528517	1:1528517:A:G	ENSG00000197785	ATAD3A	chr1:1485171:1485782:clu_26061_?:ENSG00000197785	G	A	16355	0.0625	12	12	7.46816e-12	1.83812	0.23272	6.81486e-12	1.13656e-05	9.99888e-06
1	1531499	1:1531499:C:T	ENSG00000197785	ATAD3A	chr1:1485171:1485782:clu_26061_?:ENSG00000197785	T	C	19337	0.0625	12	12	7.46816e-12	1.83812	0.23272	6.81486e-12	1.13656e-05	9.99888e-06
1	1531499	1:1531499:C:T	ENSG00000160072	ATAD3B	chr1:1485171:1485782:clu_26061_?:ENSG00000160072	T	C	59734	0.0625	12	12	7.46816e-12	1.83812	0.23272	6.81486e-12	5.63656e-06	1.31691e-05
1	1532745	1:1532745:C:G	ENSG00000160072	ATAD3B	chr1:1485171:1485782:clu_26061_?:ENSG00000160072	G	C	60980	0.0677083	13	13	9.39322e-09	1.5738	0.248065	6.81486e-12	5.63656e-06	1.31691e-05
1	1532745	1:1532745:C:G	ENSG00000197785	ATAD3A	chr1:1485171:1485782:clu_26061_?:ENSG00000197785	G	C	20583	0.0677083	13	13	9.39322e-09	1.5738	0.248065	6.81486e-12	1.13656e-05	9.99888e-06
1	1533601	1:1533601:T:A	ENSG00000197785	ATAD3A	chr1:1485171:1485782:clu_26061_?:ENSG00000197785	A	T	21439	0.0677083	13	13	7.99169e-09	1.52385	0.238828	6.81486e-12	1.13656e-05	9.99888e-06
1	1533601	1:1533601:T:A	ENSG00000160072	ATAD3B	chr1:1485171:1485782:clu_26061_?:ENSG00000160072	A	T	61836	0.0677083	13	13	7.99169e-09	1.52385	0.238828	6.81486e-12	5.63656e-06	1.31691e-05
1	1534092	1:1534092:G:C	ENSG00000160072	ATAD3B	chr1:1485171:1485782:clu_26061_?:ENSG00000160072	C	G	62327	0.0677083	13	13	6.81486e-12	1.8287	0.230957	6.81486e-12	5.63656e-06	1.31691e-05
1	1534092	1:1534092:G:C	ENSG00000197785	ATAD3A	chr1:1485171:1485782:clu_26061_?:ENSG00000197785	C	G	21930	0.0677083	13	13	6.81486e-12	1.8287	0.230957	6.81486e-12	1.13656e-05	9.99888e-06
1	1534315	1:1534315:T:C	ENSG00000160072	ATAD3B	chr1:1485171:1485782:clu_26061_?:ENSG00000160072	C	T	62550	0.0572917	11	11	3.80783e-10	1.73232	0.245637	6.81486e-12	5.63656e-06	1.31691e-05
1	1534315	1:1534315:T:C	ENSG00000197785	ATAD3A	chr1:1485171:1485782:clu_26061_?:ENSG00000197785	C	T	22153	0.0572917	11	11	3.80783e-10	1.73232	0.245637	6.81486e-12	1.13656e-05	9.99888e-06
1	1534781	1:1534781:C:T	ENSG00000160072	ATAD3B	chr1:1485171:1485782:clu_26061_?:ENSG00000160072	T	C	63016	0.0572917	11	11	3.51698e-08	1.58948	0.26292	6.81486e-12	5.63656e-06	1.31691e-05
1	1534781	1:1534781:C:T	ENSG00000197785	ATAD3A	chr1:1485171:1485782:clu_26061_?:ENSG00000197785	T	C	22619	0.0572917	11	11	3.51698e-08	1.58948	0.26292	6.81486e-12	1.13656e-05	9.99888e-06
1	1537150	1:1537150:G:A	ENSG00000197785	ATAD3A	chr1:1485171:1485782:clu_26061_?:ENSG00000197785	A	G	24988	0.0625	12	12	7.46816e-12	1.83812	0.23272	6.81486e-12	1.13656e-05	9.99888e-06
1	1537150	1:1537150:G:A	ENSG00000160072	ATAD3B	chr1:1485171:1485782:clu_26061_?:ENSG00000160072	A	G	65385	0.0625	12	12	7.46816e-12	1.83812	0.23272	6.81486e-12	5.63656e-06	1.31691e-05
1	1540757	1:1540757:C:T	ENSG00000197785	ATAD3A	chr1:1485171:1485782:clu_26061_?:ENSG00000197785	T	C	28595	0.0677083	12	13	7.54409e-12	1.65602	0.209722	6.81486e-12	1.13656e-05	9.99888e-06
1	1540757	1:1540757:C:T	ENSG00000160072	ATAD3B	chr1:1485171:1485782:clu_26061_?:ENSG00000160072	T	C	68992	0.0677083	12	13	7.54409e-12	1.65602	0.209722	6.81486e-12	5.63656e-06	1.31691e-05
1	1544071	1:1544071:C:T	ENSG00000160072	ATAD3B	chr1:1485171:1485782:clu_26061_?:ENSG00000160072	T	C	72306	0.0677083	12	13	7.54409e-12	1.65602	0.209722	6.81486e-12	5.63656e-06	1.31691e-05
1	1544071	1:1544071:C:T	ENSG00000197785	ATAD3A	chr1:1485171:1485782:clu_26061_?:ENSG00000197785	T	C	31909	0.0677083	12	13	7.54409e-12	1.65602	0.209722	6.81486e-12	1.13656e-05	9.99888e-06
1	1544409	1:1544409:G:C	ENSG00000197785	ATAD3A	chr1:1485171:1485782:clu_26061_?:ENSG00000197785	C	G	32247	0.0677083	12	13	7.54409e-12	1.65602	0.209722	6.81486e-12	1.13656e-05	9.99888e-06
1	1544409	1:1544409:G:C	ENSG00000160072	ATAD3B	chr1:1485171:1485782:clu_26061_?:ENSG00000160072	C	G	72644	0.0677083	12	13	7.54409e-12	1.65602	0.209722	6.81486e-12	5.63656e-06	1.31691e-05
1	1545638	1:1545638:T:C	ENSG00000197785	ATAD3A	chr1:1485171:1485782:clu_26061_?:ENSG00000197785	C	T	33476	0.0677083	12	13	7.54409e-12	1.65602	0.209722	6.81486e-12	1.13656e-05	9.99888e-06
1	1545638	1:1545638:T:C	ENSG00000160072	ATAD3B	chr1:1485171:1485782:clu_26061_?:ENSG00000160072	C	T	73873	0.0677083	12	13	7.54409e-12	1.65602	0.209722	6.81486e-12	5.63656e-06	1.31691e-05
1	1546790	1:1546790:C:T	ENSG00000197785	ATAD3A	chr1:1485171:1485782:clu_26061_?:ENSG00000197785	T	C	34628	0.0677083	12	13	7.54409e-12	1.65602	0.209722	6.81486e-12	1.13656e-05	9.99888e-06
1	1546790	1:1546790:C:T	ENSG00000160072	ATAD3B	chr1:1485171:1485782:clu_26061_?:ENSG00000160072	T	C	75025	0.0677083	12	13	7.54409e-12	1.65602	0.209722	6.81486e-12	5.63656e-06	1.31691e-05
1	1547197	1:1547197:C:T	ENSG00000197785	ATAD3A	chr1:1485171:1485782:clu_26061_?:ENSG00000197785	T	C	35035	0.0520833	9	10	3.08731e-07	1.39855	0.252385	6.81486e-12	1.13656e-05	9.99888e-06
1	1547197	1:1547197:C:T	ENSG00000160072	ATAD3B	chr1:1485171:1485782:clu_26061_?:ENSG00000160072	T	C	75432	0.0520833	9	10	3.08731e-07	1.39855	0.252385	6.81486e-12	5.63656e-06	1.31691e-05
1	1548498	1:1548498:G:A	ENSG00000160072	ATAD3B	chr1:1485171:1485782:clu_26061_?:ENSG00000160072	A	G	76733	0.0677083	12	13	7.54409e-12	1.65602	0.209722	6.81486e-12	5.63656e-06	1.31691e-05
1	1548498	1:1548498:G:A	ENSG00000197785	ATAD3A	chr1:1485171:1485782:clu_26061_?:ENSG00000197785	A	G	36336	0.0677083	12	13	7.54409e-12	1.65602	0.209722	6.81486e-12	1.13656e-05	9.99888e-06
1	1549475	1:1549475:C:T	ENSG00000197785	ATAD3A	chr1:1485171:1485782:clu_26061_?:ENSG00000197785	T	C	37313	0.0520833	9	10	3.08731e-07	1.39855	0.252385	6.81486e-12	1.13656e-05	9.99888e-06
1	1549475	1:1549475:C:T	ENSG00000160072	ATAD3B	chr1:1485171:1485782:clu_26061_?:ENSG00000160072	T	C	77710	0.0520833	9	10	3.08731e-07	1.39855	0.252385	6.81486e-12	5.63656e-06	1.31691e-05
1	1550104	1:1550104:G:T	ENSG00000197785	ATAD3A	chr1:1485171:1485782:clu_26061_?:ENSG00000197785	T	G	37942	0.0677083	12	13	7.54409e-12	1.65602	0.209722	6.81486e-12	1.13656e-05	9.99888e-06
1	1550104	1:1550104:G:T	ENSG00000160072	ATAD3B	chr1:1485171:1485782:clu_26061_?:ENSG00000160072	T	G	78339	0.0677083	12	13	7.54409e-12	1.65602	0.209722	6.81486e-12	5.63656e-06	1.31691e-05
1	1551402	1:1551402:G:A	ENSG00000197785	ATAD3A	chr1:1485171:1485782:clu_26061_?:ENSG00000197785	A	G	39240	0.0677083	12	13	7.54409e-12	1.65602	0.209722	6.81486e-12	1.13656e-05	9.99888e-06
1	1551402	1:1551402:G:A	ENSG00000160072	ATAD3B	chr1:1485171:1485782:clu_26061_?:ENSG00000160072	A	G	79637	0.0677083	12	13	7.54409e-12	1.65602	0.209722	6.81486e-12	5.63656e-06	1.31691e-05
1	1551663	1:1551663:C:T	ENSG00000160072	ATAD3B	chr1:1485171:1485782:clu_26061_?:ENSG00000160072	T	C	79898	0.0677083	12	13	7.54409e-12	1.65602	0.209722	6.81486e-12	5.63656e-06	1.31691e-05
1	1551663	1:1551663:C:T	ENSG00000197785	ATAD3A	chr1:1485171:1485782:clu_26061_?:ENSG00000197785	T	C	39501	0.0677083	12	13	7.54409e-12	1.65602	0.209722	6.81486e-12	1.13656e-05	9.99888e-06
1	1551852	1:1551852:C:T	ENSG00000160072	ATAD3B	chr1:1485171:1485782:clu_26061_?:ENSG00000160072	T	C	80087	0.0677083	12	13	7.54409e-12	1.65602	0.209722	6.81486e-12	5.63656e-06	1.31691e-05
1	1551852	1:1551852:C:T	ENSG00000197785	ATAD3A	chr1:1485171:1485782:clu_26061_?:ENSG00000197785	T	C	39690	0.0677083	12	13	7.54409e-12	1.65602	0.209722	6.81486e-12	1.13656e-05	9.99888e-06
1	1556066	1:1556066:C:T	ENSG00000197785	ATAD3A	chr1:1485171:1485782:clu_26061_?:ENSG00000197785	T	C	43904	0.0520833	9	10	3.08731e-07	1.39855	0.252385	6.81486e-12	1.13656e-05	9.99888e-06
1	1556066	1:1556066:C:T	ENSG00000160072	ATAD3B	chr1:1485171:1485782:clu_26061_?:ENSG00000160072	T	C	84301	0.0520833	9	10	3.08731e-07	1.39855	0.252385	6.81486e-12	5.63656e-06	1.31691e-05
1	1556204	1:1556204:G:A	ENSG00000160072	ATAD3B	chr1:1485171:1485782:clu_26061_?:ENSG00000160072	A	G	84439	0.0520833	9	10	3.08731e-07	1.39855	0.252385	6.81486e-12	5.63656e-06	1.31691e-05
1	1556204	1:1556204:G:A	ENSG00000197785	ATAD3A	chr1:1485171:1485782:clu_26061_?:ENSG00000197785	A	G	44042	0.0520833	9	10	3.08731e-07	1.39855	0.252385	6.81486e-12	1.13656e-05	9.99888e-06
1	1609890	1:1609890:C:T	ENSG00000248333	CDK11B	chr1:1642508:1645126:clu_26087_?:ENSG00000248333	T	C	-49122	0.0989583	17	19	8.07542e-09	1.43295	0.224664	2.04423e-09	0.00104518	4.48009e-06
1	1627156	1:1627156:G:A	ENSG00000248333	CDK11B	chr1:1642508:1645126:clu_26087_?:ENSG00000248333	A	G	-31856	0.0989583	17	19	2.09302e-08	1.39985	0.227117	2.04423e-09	0.00104518	4.48009e-06
1	1677707	1:1677707:C:T	ENSG00000248333	CDK11B	chr1:1645262:1649499:clu_26087_?:ENSG00000248333	T	C	18695	0.135417	23	26	7.10811e-07	-1.16226	0.217541	2.04423e-09	0.00104518	4.48009e-06
1	1677707	1:1677707:C:T	ENSG00000248333	CDK11B	chr1:1642508:1645126:clu_26087_?:ENSG00000248333	T	C	18695	0.135417	23	26	2.04423e-09	1.35285	0.202406	2.04423e-09	0.00104518	4.48009e-06
1	1703669	1:1703669:G:A	ENSG00000008128	CDK11A	chr1:1716478:1719328:clu_26090_?:ENSG00000008128	A	G	-20688	0.276042	37	53	3.40334e-06	-0.708973	0.142933	1.68274e-09	0.00964957	3.81141e-06
1	1703669	1:1703669:G:A	ENSG00000008128	CDK11A	chr1:1721711:1722588:clu_26104_?:ENSG00000008128	A	G	-20688	0.276042	37	53	5.35548e-08	0.826611	0.138945	1.68274e-09	0.00964957	3.81141e-06
1	1703754	1:1703754:T:C	ENSG00000008128	CDK11A	chr1:1721711:1722588:clu_26104_?:ENSG00000008128	C	T	-20603	0.270833	36	52	2.5597e-08	0.835922	0.136636	1.68274e-09	0.00964957	3.81141e-06
1	1704126	1:1704126:C:T	ENSG00000008128	CDK11A	chr1:1716478:1719328:clu_26090_?:ENSG00000008128	T	C	-20231	0.276042	37	53	3.40334e-06	-0.708973	0.142933	1.68274e-09	0.00964957	3.81141e-06
1	1704126	1:1704126:C:T	ENSG00000008128	CDK11A	chr1:1721711:1722588:clu_26104_?:ENSG00000008128	T	C	-20231	0.276042	37	53	5.35548e-08	0.826611	0.138945	1.68274e-09	0.00964957	3.81141e-06
1	1704504	1:1704504:A:C	ENSG00000008128	CDK11A	chr1:1716478:1719328:clu_26090_?:ENSG00000008128	C	A	-19853	0.276042	37	53	3.40334e-06	-0.708973	0.142933	1.68274e-09	0.00964957	3.81141e-06
1	1704504	1:1704504:A:C	ENSG00000008128	CDK11A	chr1:1721711:1722588:clu_26104_?:ENSG00000008128	C	A	-19853	0.276042	37	53	5.35548e-08	0.826611	0.138945	1.68274e-09	0.00964957	3.81141e-06
1	1704540	1:1704540:G:C	ENSG00000008128	CDK11A	chr1:1721711:1722588:clu_26104_?:ENSG00000008128	C	G	-19817	0.276042	37	53	5.35548e-08	0.826611	0.138945	1.68274e-09	0.00964957	3.81141e-06
1	1704540	1:1704540:G:C	ENSG00000008128	CDK11A	chr1:1716478:1719328:clu_26090_?:ENSG00000008128	C	G	-19817	0.276042	37	53	3.40334e-06	-0.708973	0.142933	1.68274e-09	0.00964957	3.81141e-06
1	1704673	1:1704673:G:A	ENSG00000008128	CDK11A	chr1:1721711:1722588:clu_26104_?:ENSG00000008128	A	G	-19684	0.265625	37	51	9.26124e-08	0.83206	0.142894	1.68274e-09	0.00964957	3.81141e-06
1	1706027	1:1706027:G:A	ENSG00000008128	CDK11A	chr1:1721711:1722588:clu_26104_?:ENSG00000008128	A	G	-18330	0.21875	30	42	9.59893e-07	0.823746	0.156299	1.68274e-09	0.00964957	3.81141e-06
1	1706141	1:1706141:C:T	ENSG00000008128	CDK11A	chr1:1721711:1722588:clu_26104_?:ENSG00000008128	T	C	-18216	0.270833	37	52	2.75975e-08	0.852154	0.13968	1.68274e-09	0.00964957	3.81141e-06
1	1706210	1:1706210:G:A	ENSG00000008128	CDK11A	chr1:1721711:1722588:clu_26104_?:ENSG00000008128	A	G	-18147	0.260417	35	50	1.22987e-07	0.813142	0.141242	1.68274e-09	0.00964957	3.81141e-06
1	1706210	1:1706210:G:A	ENSG00000008128	CDK11A	chr1:1716478:1719358:clu_26090_?:ENSG00000008128	A	G	-18147	0.260417	35	50	1.02686e-06	0.768292	0.146229	1.68274e-09	0.00964957	3.81141e-06
1	1706210	1:1706210:G:A	ENSG00000008128	CDK11A	chr1:1716478:1719328:clu_26090_?:ENSG00000008128	A	G	-18147	0.260417	35	50	1.24994e-06	-0.741348	0.142393	1.68274e-09	0.00964957	3.81141e-06
1	1706488	1:1706488:C:G	ENSG00000008128	CDK11A	chr1:1721711:1722588:clu_26104_?:ENSG00000008128	G	C	-17869	0.270833	37	52	2.75975e-08	0.852154	0.13968	1.68274e-09	0.00964957	3.81141e-06
1	1707090	1:1707090:A:G	ENSG00000008128	CDK11A	chr1:1721711:1722588:clu_26104_?:ENSG00000008128	G	A	-17267	0.291667	39	56	9.14178e-07	0.769825	0.145742	1.68274e-09	0.00964957	3.81141e-06
1	1707341	1:1707341:C:T	ENSG00000008128	CDK11A	chr1:1721711:1722588:clu_26104_?:ENSG00000008128	T	C	-17016	0.255208	36	49	1.64608e-07	0.827403	0.145436	1.68274e-09	0.00964957	3.81141e-06
1	1707486	1:1707486:C:T	ENSG00000008128	CDK11A	chr1:1721711:1722588:clu_26104_?:ENSG00000008128	T	C	-16871	0.239583	35	46	3.45755e-08	0.880012	0.145471	1.68274e-09	0.00964957	3.81141e-06
1	1707714	1:1707714:C:G	ENSG00000008128	CDK11A	chr1:1721711:1722588:clu_26104_?:ENSG00000008128	G	C	-16643	0.260417	37	50	1.77104e-07	0.833185	0.146894	1.68274e-09	0.00964957	3.81141e-06
1	1707716	1:1707716:T:C	ENSG00000008128	CDK11A	chr1:1721711:1722588:clu_26104_?:ENSG00000008128	C	T	-16641	0.260417	37	50	1.77104e-07	0.833185	0.146894	1.68274e-09	0.00964957	3.81141e-06
1	1707744	1:1707744:A:G	ENSG00000008128	CDK11A	chr1:1721711:1722588:clu_26104_?:ENSG00000008128	G	A	-16613	0.255208	36	49	3.09791e-07	0.811365	0.146442	1.68274e-09	0.00964957	3.81141e-06
1	1707801	1:1707801:C:G	ENSG00000008128	CDK11A	chr1:1721711:1722588:clu_26104_?:ENSG00000008128	G	C	-16556	0.265625	37	51	5.0545e-08	0.846899	0.142038	1.68274e-09	0.00964957	3.81141e-06
1	1708001	1:1708001:A:T	ENSG00000008128	CDK11A	chr1:1721711:1722588:clu_26104_?:ENSG00000008128	T	A	-16356	0.239583	34	46	2.36064e-06	0.782217	0.154872	1.68274e-09	0.00964957	3.81141e-06
1	1708131	1:1708131:C:T	ENSG00000008128	CDK11A	chr1:1721711:1722588:clu_26104_?:ENSG00000008128	T	C	-16226	0.255208	37	49	9.49529e-09	0.919318	0.14496	1.68274e-09	0.00964957	3.81141e-06
1	1708248	1:1708248:G:A	ENSG00000008128	CDK11A	chr1:1721711:1722708:clu_26104_?:ENSG00000008128	A	G	-16109	0.255208	37	49	3.14064e-06	-0.760302	0.152667	1.68274e-09	0.00964957	3.81141e-06
1	1708248	1:1708248:G:A	ENSG00000008128	CDK11A	chr1:1716478:1719328:clu_26090_?:ENSG00000008128	A	G	-16109	0.255208	37	49	2.53702e-06	-0.766139	0.152224	1.68274e-09	0.00964957	3.81141e-06
1	1708248	1:1708248:G:A	ENSG00000008128	CDK11A	chr1:1721711:1722588:clu_26104_?:ENSG00000008128	A	G	-16109	0.255208	37	49	2.81706e-09	0.950129	0.143679	1.68274e-09	0.00964957	3.81141e-06
1	1708248	1:1708248:G:A	ENSG00000008128	CDK11A	chr1:1716478:1719358:clu_26090_?:ENSG00000008128	A	G	-16109	0.255208	37	49	3.2551e-06	0.780943	0.157092	1.68274e-09	0.00964957	3.81141e-06
1	1708393	1:1708393:T:C	ENSG00000008128	CDK11A	chr1:1716478:1719328:clu_26090_?:ENSG00000008128	C	T	-15964	0.270833	37	52	2.94869e-06	-0.72539	0.145201	1.68274e-09	0.00964957	3.81141e-06
1	1708393	1:1708393:T:C	ENSG00000008128	CDK11A	chr1:1721711:1722708:clu_26104_?:ENSG00000008128	C	T	-15964	0.270833	37	52	1.5978e-06	-0.742696	0.14431	1.68274e-09	0.00964957	3.81141e-06
1	1708393	1:1708393:T:C	ENSG00000008128	CDK11A	chr1:1721711:1722588:clu_26104_?:ENSG00000008128	C	T	-15964	0.270833	37	52	2.8193e-09	0.904784	0.136825	1.68274e-09	0.00964957	3.81141e-06
1	1708474	1:1708474:C:A	ENSG00000008128	CDK11A	chr1:1721711:1722588:clu_26104_?:ENSG00000008128	A	C	-15883	0.328125	47	63	1.51143e-06	0.715025	0.138568	1.68274e-09	0.00964957	3.81141e-06
1	1708728	1:1708728:C:T	ENSG00000008128	CDK11A	chr1:1721711:1722588:clu_26104_?:ENSG00000008128	T	C	-15629	0.21875	37	42	1.88768e-06	0.931529	0.182448	1.68274e-09	0.00964957	3.81141e-06
1	1708737	1:1708737:G:C	ENSG00000008128	CDK11A	chr1:1721711:1722588:clu_26104_?:ENSG00000008128	C	G	-15620	0.21875	37	42	1.88768e-06	0.931529	0.182448	1.68274e-09	0.00964957	3.81141e-06
1	1708738	1:1708738:G:A	ENSG00000008128	CDK11A	chr1:1721711:1722588:clu_26104_?:ENSG00000008128	A	G	-15619	0.21875	37	42	1.88768e-06	0.931529	0.182448	1.68274e-09	0.00964957	3.81141e-06
1	1710588	1:1710588:C:T	ENSG00000008128	CDK11A	chr1:1721711:1722588:clu_26104_?:ENSG00000008128	C	T	-13769	0.744792	39	49	2.36632e-08	-0.890719	0.14517	1.68274e-09	0.00964957	3.81141e-06
1	1710588	1:1710588:C:T	ENSG00000008128	CDK11A	chr1:1721711:1722708:clu_26104_?:ENSG00000008128	C	T	-13769	0.744792	39	49	3.5354e-06	0.746778	0.150843	1.68274e-09	0.00964957	3.81141e-06
1	1714988	1:1714988:T:G	ENSG00000008128	CDK11A	chr1:1721711:1722708:clu_26104_?:ENSG00000008128	T	G	-9369	0.703125	40	57	1.42278e-06	0.70097	0.135457	1.68274e-09	0.00964957	3.81141e-06
1	1714988	1:1714988:T:G	ENSG00000008128	CDK11A	chr1:1721711:1722588:clu_26104_?:ENSG00000008128	T	G	-9369	0.703125	40	57	2.65687e-09	-0.851491	0.128511	1.68274e-09	0.00964957	3.81141e-06
1	1715011	1:1715011:G:A	ENSG00000008128	CDK11A	chr1:1721711:1722708:clu_26104_?:ENSG00000008128	G	A	-9346	0.703125	40	57	1.42278e-06	0.70097	0.135457	1.68274e-09	0.00964957	3.81141e-06
1	1715011	1:1715011:G:A	ENSG00000008128	CDK11A	chr1:1721711:1722588:clu_26104_?:ENSG00000008128	G	A	-9346	0.703125	40	57	2.65687e-09	-0.851491	0.128511	1.68274e-09	0.00964957	3.81141e-06
1	1715218	1:1715218:T:C	ENSG00000008128	CDK11A	chr1:1721711:1722588:clu_26104_?:ENSG00000008128	T	C	-9139	0.703125	40	57	2.65687e-09	-0.851491	0.128511	1.68274e-09	0.00964957	3.81141e-06
1	1715218	1:1715218:T:C	ENSG00000008128	CDK11A	chr1:1721711:1722708:clu_26104_?:ENSG00000008128	T	C	-9139	0.703125	40	57	1.42278e-06	0.70097	0.135457	1.68274e-09	0.00964957	3.81141e-06
1	1715350	1:1715350:T:C	ENSG00000008128	CDK11A	chr1:1721711:1722588:clu_26104_?:ENSG00000008128	T	C	-9007	0.71875	40	54	2.55307e-08	-0.839774	0.137253	1.68274e-09	0.00964957	3.81141e-06
1	1715546	1:1715546:C:T	ENSG00000008128	CDK11A	chr1:1721711:1722588:clu_26104_?:ENSG00000008128	C	T	-8811	0.651042	49	67	1.31171e-07	-0.821226	0.143019	1.68274e-09	0.00964957	3.81141e-06
1	1715860	1:1715860:C:T	ENSG00000008128	CDK11A	chr1:1721711:1722708:clu_26104_?:ENSG00000008128	C	T	-8497	0.703125	40	57	1.42278e-06	0.70097	0.135457	1.68274e-09	0.00964957	3.81141e-06
1	1715860	1:1715860:C:T	ENSG00000008128	CDK11A	chr1:1721711:1722588:clu_26104_?:ENSG00000008128	C	T	-8497	0.703125	40	57	2.65687e-09	-0.851491	0.128511	1.68274e-09	0.00964957	3.81141e-06
1	1715862	1:1715862:G:A	ENSG00000008128	CDK11A	chr1:1721711:1722588:clu_26104_?:ENSG00000008128	G	A	-8495	0.703125	40	57	2.65687e-09	-0.851491	0.128511	1.68274e-09	0.00964957	3.81141e-06
1	1715862	1:1715862:G:A	ENSG00000008128	CDK11A	chr1:1721711:1722708:clu_26104_?:ENSG00000008128	G	A	-8495	0.703125	40	57	1.42278e-06	0.70097	0.135457	1.68274e-09	0.00964957	3.81141e-06
1	1716085	1:1716085:C:T	ENSG00000008128	CDK11A	chr1:1721711:1722588:clu_26104_?:ENSG00000008128	C	T	-8272	0.703125	40	57	2.65687e-09	-0.851491	0.128511	1.68274e-09	0.00964957	3.81141e-06
1	1716085	1:1716085:C:T	ENSG00000008128	CDK11A	chr1:1721711:1722708:clu_26104_?:ENSG00000008128	C	T	-8272	0.703125	40	57	1.42278e-06	0.70097	0.135457	1.68274e-09	0.00964957	3.81141e-06
1	1716089	1:1716089:G:C	ENSG00000008128	CDK11A	chr1:1721711:1722708:clu_26104_?:ENSG00000008128	G	C	-8268	0.703125	40	57	1.42278e-06	0.70097	0.135457	1.68274e-09	0.00964957	3.81141e-06
1	1716089	1:1716089:G:C	ENSG00000008128	CDK11A	chr1:1721711:1722588:clu_26104_?:ENSG00000008128	G	C	-8268	0.703125	40	57	2.65687e-09	-0.851491	0.128511	1.68274e-09	0.00964957	3.81141e-06
1	1716247	1:1716247:A:C	ENSG00000008128	CDK11A	chr1:1721711:1722588:clu_26104_?:ENSG00000008128	A	C	-8110	0.708333	39	56	5.68138e-09	-0.827837	0.128211	1.68274e-09	0.00964957	3.81141e-06
1	1716247	1:1716247:A:C	ENSG00000008128	CDK11A	chr1:1721711:1722708:clu_26104_?:ENSG00000008128	A	C	-8110	0.708333	39	56	3.6454e-06	0.66926	0.135394	1.68274e-09	0.00964957	3.81141e-06
1	1716588	1:1716588:T:C	ENSG00000008128	CDK11A	chr1:1721711:1722588:clu_26104_?:ENSG00000008128	T	C	-7769	0.734375	36	51	2.49037e-06	-0.696363	0.138234	1.68274e-09	0.00964957	3.81141e-06
1	1716769	1:1716769:C:T	ENSG00000008128	CDK11A	chr1:1721711:1722708:clu_26104_?:ENSG00000008128	C	T	-7588	0.703125	40	57	1.42278e-06	0.70097	0.135457	1.68274e-09	0.00964957	3.81141e-06
1	1716769	1:1716769:C:T	ENSG00000008128	CDK11A	chr1:1721711:1722588:clu_26104_?:ENSG00000008128	C	T	-7588	0.703125	40	57	2.65687e-09	-0.851491	0.128511	1.68274e-09	0.00964957	3.81141e-06
1	1716796	1:1716796:A:C	ENSG00000008128	CDK11A	chr1:1721711:1722588:clu_26104_?:ENSG00000008128	A	C	-7561	0.697917	40	58	1.68274e-09	-0.847342	0.125966	1.68274e-09	0.00964957	3.81141e-06
1	1716796	1:1716796:A:C	ENSG00000008128	CDK11A	chr1:1721711:1722708:clu_26104_?:ENSG00000008128	A	C	-7561	0.697917	40	58	5.71959e-07	0.712757	0.13212	1.68274e-09	0.00964957	3.81141e-06
1	1716966	1:1716966:A:G	ENSG00000008128	CDK11A	chr1:1721711:1722588:clu_26104_?:ENSG00000008128	A	G	-7391	0.734375	36	51	2.49037e-06	-0.696363	0.138234	1.68274e-09	0.00964957	3.81141e-06
1	1717185	1:1717185:C:A	ENSG00000008128	CDK11A	chr1:1721711:1722708:clu_26104_?:ENSG00000008128	C	A	-7172	0.703125	40	57	1.42278e-06	0.70097	0.135457	1.68274e-09	0.00964957	3.81141e-06
1	1717185	1:1717185:C:A	ENSG00000008128	CDK11A	chr1:1721711:1722588:clu_26104_?:ENSG00000008128	C	A	-7172	0.703125	40	57	2.65687e-09	-0.851491	0.128511	1.68274e-09	0.00964957	3.81141e-06
1	1717507	1:1717507:T:C	ENSG00000008128	CDK11A	chr1:1721711:1722708:clu_26104_?:ENSG00000008128	T	C	-6850	0.703125	40	57	1.42278e-06	0.70097	0.135457	1.68274e-09	0.00964957	3.81141e-06
1	1717507	1:1717507:T:C	ENSG00000008128	CDK11A	chr1:1721711:1722588:clu_26104_?:ENSG00000008128	T	C	-6850	0.703125	40	57	2.65687e-09	-0.851491	0.128511	1.68274e-09	0.00964957	3.81141e-06
1	1718200	1:1718200:G:A	ENSG00000008128	CDK11A	chr1:1721711:1722588:clu_26104_?:ENSG00000008128	G	A	-6157	0.703125	40	57	2.71957e-09	-0.825477	0.124682	1.68274e-09	0.00964957	3.81141e-06
1	1718200	1:1718200:G:A	ENSG00000008128	CDK11A	chr1:1721711:1722708:clu_26104_?:ENSG00000008128	G	A	-6157	0.703125	40	57	1.02619e-06	0.687857	0.130916	1.68274e-09	0.00964957	3.81141e-06
1	1718593	1:1718593:A:C	ENSG00000008128	CDK11A	chr1:1721711:1722588:clu_26104_?:ENSG00000008128	A	C	-5764	0.703125	40	57	2.65687e-09	-0.851491	0.128511	1.68274e-09	0.00964957	3.81141e-06
1	1718593	1:1718593:A:C	ENSG00000008128	CDK11A	chr1:1721711:1722708:clu_26104_?:ENSG00000008128	A	C	-5764	0.703125	40	57	1.42278e-06	0.70097	0.135457	1.68274e-09	0.00964957	3.81141e-06
1	1718594	1:1718594:T:C	ENSG00000008128	CDK11A	chr1:1721711:1722708:clu_26104_?:ENSG00000008128	T	C	-5763	0.703125	40	57	1.42278e-06	0.70097	0.135457	1.68274e-09	0.00964957	3.81141e-06
1	1718594	1:1718594:T:C	ENSG00000008128	CDK11A	chr1:1721711:1722588:clu_26104_?:ENSG00000008128	T	C	-5763	0.703125	40	57	2.65687e-09	-0.851491	0.128511	1.68274e-09	0.00964957	3.81141e-06
1	1718663	1:1718663:C:T	ENSG00000008128	CDK11A	chr1:1721711:1722708:clu_26104_?:ENSG00000008128	C	T	-5694	0.703125	40	57	1.42278e-06	0.70097	0.135457	1.68274e-09	0.00964957	3.81141e-06
1	1718663	1:1718663:C:T	ENSG00000008128	CDK11A	chr1:1721711:1722588:clu_26104_?:ENSG00000008128	C	T	-5694	0.703125	40	57	2.65687e-09	-0.851491	0.128511	1.68274e-09	0.00964957	3.81141e-06
1	1718761	1:1718761:A:C	ENSG00000008128	CDK11A	chr1:1721711:1722588:clu_26104_?:ENSG00000008128	A	C	-5596	0.703125	40	57	2.65687e-09	-0.851491	0.128511	1.68274e-09	0.00964957	3.81141e-06
1	1718761	1:1718761:A:C	ENSG00000008128	CDK11A	chr1:1721711:1722708:clu_26104_?:ENSG00000008128	A	C	-5596	0.703125	40	57	1.42278e-06	0.70097	0.135457	1.68274e-09	0.00964957	3.81141e-06
1	1718824	1:1718824:G:T	ENSG00000008128	CDK11A	chr1:1721711:1722708:clu_26104_?:ENSG00000008128	G	T	-5533	0.703125	40	57	1.42278e-06	0.70097	0.135457	1.68274e-09	0.00964957	3.81141e-06
1	1718824	1:1718824:G:T	ENSG00000008128	CDK11A	chr1:1721711:1722588:clu_26104_?:ENSG00000008128	G	T	-5533	0.703125	40	57	2.65687e-09	-0.851491	0.128511	1.68274e-09	0.00964957	3.81141e-06
1	1718971	1:1718971:T:C	ENSG00000008128	CDK11A	chr1:1721711:1722588:clu_26104_?:ENSG00000008128	T	C	-5386	0.703125	40	57	2.65687e-09	-0.851491	0.128511	1.68274e-09	0.00964957	3.81141e-06
1	1718971	1:1718971:T:C	ENSG00000008128	CDK11A	chr1:1721711:1722708:clu_26104_?:ENSG00000008128	T	C	-5386	0.703125	40	57	1.42278e-06	0.70097	0.135457	1.68274e-09	0.00964957	3.81141e-06
1	1719368	1:1719368:T:C	ENSG00000008128	CDK11A	chr1:1721711:1722708:clu_26104_?:ENSG00000008128	T	C	-4989	0.703125	40	57	1.42278e-06	0.70097	0.135457	1.68274e-09	0.00964957	3.81141e-06
1	1719368	1:1719368:T:C	ENSG00000008128	CDK11A	chr1:1721711:1722588:clu_26104_?:ENSG00000008128	T	C	-4989	0.703125	40	57	2.65687e-09	-0.851491	0.128511	1.68274e-09	0.00964957	3.81141e-06
1	1719406	1:1719406:G:A	ENSG00000008128	CDK11A	chr1:1721711:1722708:clu_26104_?:ENSG00000008128	G	A	-4951	0.703125	40	57	1.42278e-06	0.70097	0.135457	1.68274e-09	0.00964957	3.81141e-06
1	1719406	1:1719406:G:A	ENSG00000008128	CDK11A	chr1:1721711:1722588:clu_26104_?:ENSG00000008128	G	A	-4951	0.703125	40	57	2.65687e-09	-0.851491	0.128511	1.68274e-09	0.00964957	3.81141e-06
1	1719827	1:1719827:A:G	ENSG00000008128	CDK11A	chr1:1721711:1722588:clu_26104_?:ENSG00000008128	A	G	-4530	0.734375	36	51	2.49037e-06	-0.696363	0.138234	1.68274e-09	0.00964957	3.81141e-06
1	1720183	1:1720183:C:T	ENSG00000008128	CDK11A	chr1:1721711:1722588:clu_26104_?:ENSG00000008128	C	T	-4174	0.703125	40	57	2.65687e-09	-0.851491	0.128511	1.68274e-09	0.00964957	3.81141e-06
1	1720183	1:1720183:C:T	ENSG00000008128	CDK11A	chr1:1721711:1722708:clu_26104_?:ENSG00000008128	C	T	-4174	0.703125	40	57	1.42278e-06	0.70097	0.135457	1.68274e-09	0.00964957	3.81141e-06
1	1720309	1:1720309:G:C	ENSG00000008128	CDK11A	chr1:1721711:1722588:clu_26104_?:ENSG00000008128	G	C	-4048	0.703125	40	57	2.65687e-09	-0.851491	0.128511	1.68274e-09	0.00964957	3.81141e-06
1	1720309	1:1720309:G:C	ENSG00000008128	CDK11A	chr1:1721711:1722708:clu_26104_?:ENSG00000008128	G	C	-4048	0.703125	40	57	1.42278e-06	0.70097	0.135457	1.68274e-09	0.00964957	3.81141e-06
1	1720376	1:1720376:T:C	ENSG00000008128	CDK11A	chr1:1721711:1722588:clu_26104_?:ENSG00000008128	T	C	-3981	0.703125	40	57	2.65687e-09	-0.851491	0.128511	1.68274e-09	0.00964957	3.81141e-06
1	1720376	1:1720376:T:C	ENSG00000008128	CDK11A	chr1:1721711:1722708:clu_26104_?:ENSG00000008128	T	C	-3981	0.703125	40	57	1.42278e-06	0.70097	0.135457	1.68274e-09	0.00964957	3.81141e-06
1	1720472	1:1720472:C:A	ENSG00000008128	CDK11A	chr1:1721711:1722708:clu_26104_?:ENSG00000008128	C	A	-3885	0.703125	40	57	1.42278e-06	0.70097	0.135457	1.68274e-09	0.00964957	3.81141e-06
1	1720472	1:1720472:C:A	ENSG00000008128	CDK11A	chr1:1721711:1722588:clu_26104_?:ENSG00000008128	C	A	-3885	0.703125	40	57	2.65687e-09	-0.851491	0.128511	1.68274e-09	0.00964957	3.81141e-06
1	1720498	1:1720498:G:A	ENSG00000008128	CDK11A	chr1:1721711:1722588:clu_26104_?:ENSG00000008128	G	A	-3859	0.703125	40	57	2.65687e-09	-0.851491	0.128511	1.68274e-09	0.00964957	3.81141e-06
1	1720498	1:1720498:G:A	ENSG00000008128	CDK11A	chr1:1721711:1722708:clu_26104_?:ENSG00000008128	G	A	-3859	0.703125	40	57	1.42278e-06	0.70097	0.135457	1.68274e-09	0.00964957	3.81141e-06
1	1720523	1:1720523:G:A	ENSG00000008128	CDK11A	chr1:1721711:1722588:clu_26104_?:ENSG00000008128	G	A	-3834	0.713542	40	55	1.89713e-08	-0.82724	0.133732	1.68274e-09	0.00964957	3.81141e-06
1	1720787	1:1720787:A:G	ENSG00000008128	CDK11A	chr1:1721711:1722708:clu_26104_?:ENSG00000008128	A	G	-3570	0.703125	40	57	1.42278e-06	0.70097	0.135457	1.68274e-09	0.00964957	3.81141e-06
1	1720787	1:1720787:A:G	ENSG00000008128	CDK11A	chr1:1721711:1722588:clu_26104_?:ENSG00000008128	A	G	-3570	0.703125	40	57	2.65687e-09	-0.851491	0.128511	1.68274e-09	0.00964957	3.81141e-06
1	1721565	1:1721565:T:C	ENSG00000008128	CDK11A	chr1:1721711:1722708:clu_26104_?:ENSG00000008128	T	C	-2792	0.703125	40	57	1.42278e-06	0.70097	0.135457	1.68274e-09	0.00964957	3.81141e-06
1	1721565	1:1721565:T:C	ENSG00000008128	CDK11A	chr1:1721711:1722588:clu_26104_?:ENSG00000008128	T	C	-2792	0.703125	40	57	2.65687e-09	-0.851491	0.128511	1.68274e-09	0.00964957	3.81141e-06
1	1721589	1:1721589:C:T	ENSG00000008128	CDK11A	chr1:1721711:1722588:clu_26104_?:ENSG00000008128	C	T	-2768	0.703125	40	57	2.65687e-09	-0.851491	0.128511	1.68274e-09	0.00964957	3.81141e-06
1	1721589	1:1721589:C:T	ENSG00000008128	CDK11A	chr1:1721711:1722708:clu_26104_?:ENSG00000008128	C	T	-2768	0.703125	40	57	1.42278e-06	0.70097	0.135457	1.68274e-09	0.00964957	3.81141e-06
1	1721864	1:1721864:T:C	ENSG00000008128	CDK11A	chr1:1721711:1722708:clu_26104_?:ENSG00000008128	T	C	-2493	0.703125	40	57	1.42278e-06	0.70097	0.135457	1.68274e-09	0.00964957	3.81141e-06
1	1721864	1:1721864:T:C	ENSG00000008128	CDK11A	chr1:1721711:1722588:clu_26104_?:ENSG00000008128	T	C	-2493	0.703125	40	57	2.65687e-09	-0.851491	0.128511	1.68274e-09	0.00964957	3.81141e-06
1	1721922	1:1721922:C:T	ENSG00000008128	CDK11A	chr1:1721711:1722708:clu_26104_?:ENSG00000008128	C	T	-2435	0.703125	40	57	1.42278e-06	0.70097	0.135457	1.68274e-09	0.00964957	3.81141e-06
1	1721922	1:1721922:C:T	ENSG00000008128	CDK11A	chr1:1721711:1722588:clu_26104_?:ENSG00000008128	C	T	-2435	0.703125	40	57	2.65687e-09	-0.851491	0.128511	1.68274e-09	0.00964957	3.81141e-06
1	1721975	1:1721975:C:T	ENSG00000008128	CDK11A	chr1:1721711:1722708:clu_26104_?:ENSG00000008128	C	T	-2382	0.703125	40	57	1.42278e-06	0.70097	0.135457	1.68274e-09	0.00964957	3.81141e-06
1	1721975	1:1721975:C:T	ENSG00000008128	CDK11A	chr1:1721711:1722588:clu_26104_?:ENSG00000008128	C	T	-2382	0.703125	40	57	2.65687e-09	-0.851491	0.128511	1.68274e-09	0.00964957	3.81141e-06
1	1722360	1:1722360:C:T	ENSG00000008128	CDK11A	chr1:1721711:1722708:clu_26104_?:ENSG00000008128	C	T	-1997	0.703125	40	57	1.42278e-06	0.70097	0.135457	1.68274e-09	0.00964957	3.81141e-06
1	1722360	1:1722360:C:T	ENSG00000008128	CDK11A	chr1:1721711:1722588:clu_26104_?:ENSG00000008128	C	T	-1997	0.703125	40	57	2.65687e-09	-0.851491	0.128511	1.68274e-09	0.00964957	3.81141e-06
1	1722446	1:1722446:C:A	ENSG00000008128	CDK11A	chr1:1721711:1722588:clu_26104_?:ENSG00000008128	C	A	-1911	0.739583	40	50	4.1222e-09	-0.955014	0.146287	1.68274e-09	0.00964957	3.81141e-06
1	3780727	1:3780727:C:T	ENSG00000116198	CEP104	chr1:3839776:3844907:clu_26156_?:ENSG00000116198	T	C	-76487	0.114583	20	22	3.60305e-07	-1.13202	0.205642	2.50979e-07	0.0248106	4.00334e-06
1	3797182	1:3797182:A:G	ENSG00000116198	CEP104	chr1:3839776:3844907:clu_26156_?:ENSG00000116198	G	A	-60032	0.114583	20	22	2.83584e-07	-1.1307	0.203312	2.50979e-07	0.0248106	4.00334e-06
1	3801680	1:3801680:A:G	ENSG00000116198	CEP104	chr1:3839776:3844907:clu_26156_?:ENSG00000116198	G	A	-55534	0.130208	22	25	2.70244e-06	-0.973251	0.193977	2.50979e-07	0.0248106	4.00334e-06
1	3803326	1:3803326:C:T	ENSG00000116198	CEP104	chr1:3839776:3844907:clu_26156_?:ENSG00000116198	T	C	-53888	0.130208	20	25	2.50979e-07	-0.970072	0.173531	2.50979e-07	0.0248106	4.00334e-06
1	3805045	1:3805045:G:A	ENSG00000116198	CEP104	chr1:3839776:3844907:clu_26156_?:ENSG00000116198	A	G	-52169	0.125	21	24	6.83292e-07	-1.02765	0.192006	2.50979e-07	0.0248106	4.00334e-06
1	3806266	1:3806266:T:C	ENSG00000116198	CEP104	chr1:3839776:3844907:clu_26156_?:ENSG00000116198	C	T	-50948	0.114583	19	22	2.27204e-06	-0.997351	0.197098	2.50979e-07	0.0248106	4.00334e-06
1	3811497	1:3811497:C:T	ENSG00000116198	CEP104	chr1:3839776:3844907:clu_26156_?:ENSG00000116198	T	C	-45717	0.114583	19	22	2.81486e-06	-0.987919	0.197297	2.50979e-07	0.0248106	4.00334e-06
1	3824076	1:3824076:C:T	ENSG00000116198	CEP104	chr1:3839776:3844907:clu_26156_?:ENSG00000116198	T	C	-33138	0.114583	19	22	2.81486e-06	-0.987919	0.197297	2.50979e-07	0.0248106	4.00334e-06
1	3827520	1:3827520:G:A	ENSG00000116198	CEP104	chr1:3839776:3844907:clu_26156_?:ENSG00000116198	G	A	-29694	0.625	57	72	2.85836e-06	0.775848	0.155062	2.50979e-07	0.0248106	4.00334e-06
1	3827685	1:3827685:A:G	ENSG00000116198	CEP104	chr1:3839776:3844907:clu_26156_?:ENSG00000116198	G	A	-29529	0.114583	19	22	2.81486e-06	-0.987919	0.197297	2.50979e-07	0.0248106	4.00334e-06
1	3827697	1:3827697:C:A	ENSG00000116198	CEP104	chr1:3839776:3844907:clu_26156_?:ENSG00000116198	A	C	-29517	0.114583	19	22	2.81486e-06	-0.987919	0.197297	2.50979e-07	0.0248106	4.00334e-06
1	3836228	1:3836228:G:A	ENSG00000116198	CEP104	chr1:3839776:3844907:clu_26156_?:ENSG00000116198	A	G	-20986	0.114583	19	22	2.81486e-06	-0.987919	0.197297	2.50979e-07	0.0248106	4.00334e-06
1	3841929	1:3841929:T:C	ENSG00000116198	CEP104	chr1:3839776:3844907:clu_26156_?:ENSG00000116198	C	T	-15285	0.114583	19	22	2.81486e-06	-0.987919	0.197297	2.50979e-07	0.0248106	4.00334e-06
1	3845208	1:3845208:C:T	ENSG00000116198	CEP104	chr1:3839776:3844907:clu_26156_?:ENSG00000116198	T	C	-12006	0.114583	19	22	2.81486e-06	-0.987919	0.197297	2.50979e-07	0.0248106	4.00334e-06
1	3847652	1:3847652:C:T	ENSG00000116198	CEP104	chr1:3839776:3844907:clu_26156_?:ENSG00000116198	T	C	-9562	0.114583	19	22	2.81486e-06	-0.987919	0.197297	2.50979e-07	0.0248106	4.00334e-06
1	3850023	1:3850023:G:A	ENSG00000116198	CEP104	chr1:3839776:3844907:clu_26156_?:ENSG00000116198	A	G	-7191	0.114583	19	22	2.81486e-06	-0.987919	0.197297	2.50979e-07	0.0248106	4.00334e-06
1	24922761	1:24922761:C:A	ENSG00000020633	RUNX3	chr1:24924989:24927574:clu_26659_?:ENSG00000020633	A	C	-42360	0.489583	67	94	2.64426e-07	-0.753029	0.135003	1.67527e-07	0.0141016	9.17105e-06
1	24922761	1:24922761:C:A	ENSG00000020633	RUNX3	chr1:24919344:24927574:clu_26659_?:ENSG00000020633	A	C	-42360	0.489583	67	94	8.72698e-06	0.598266	0.126669	1.67527e-07	0.0141016	9.17105e-06
1	24924933	1:24924933:G:A	ENSG00000020633	RUNX3	chr1:24919344:24927574:clu_26659_?:ENSG00000020633	A	G	-40188	0.494792	69	95	1.88867e-06	0.663003	0.129858	1.67527e-07	0.0141016	9.17105e-06
1	24924933	1:24924933:G:A	ENSG00000020633	RUNX3	chr1:24924989:24927574:clu_26659_?:ENSG00000020633	A	G	-40188	0.494792	69	95	1.67527e-07	-0.796088	0.140033	1.67527e-07	0.0141016	9.17105e-06
1	24924965	1:24924965:G:A	ENSG00000020633	RUNX3	chr1:24924989:24927574:clu_26659_?:ENSG00000020633	A	G	-40156	0.494792	69	95	1.67527e-07	-0.796088	0.140033	1.67527e-07	0.0141016	9.17105e-06
1	24924965	1:24924965:G:A	ENSG00000020633	RUNX3	chr1:24919344:24927574:clu_26659_?:ENSG00000020633	A	G	-40156	0.494792	69	95	1.88867e-06	0.663003	0.129858	1.67527e-07	0.0141016	9.17105e-06
1	24925215	1:24925215:T:C	ENSG00000020633	RUNX3	chr1:24919344:24927574:clu_26659_?:ENSG00000020633	C	T	-39906	0.484375	67	93	4.38429e-06	0.638904	0.130469	1.67527e-07	0.0141016	9.17105e-06
1	24925215	1:24925215:T:C	ENSG00000020633	RUNX3	chr1:24924989:24927574:clu_26659_?:ENSG00000020633	C	T	-39906	0.484375	67	93	1.59286e-06	-0.735553	0.142901	1.67527e-07	0.0141016	9.17105e-06
1	24925432	1:24925432:A:T	ENSG00000020633	RUNX3	chr1:24919344:24927574:clu_26659_?:ENSG00000020633	T	A	-39689	0.369792	50	71	7.53369e-06	0.734024	0.154191	1.67527e-07	0.0141016	9.17105e-06
1	24927826	1:24927826:C:T	ENSG00000020633	RUNX3	chr1:24924989:24927574:clu_26659_?:ENSG00000020633	T	C	-37295	0.494792	69	95	1.67527e-07	-0.796088	0.140033	1.67527e-07	0.0141016	9.17105e-06
1	24927826	1:24927826:C:T	ENSG00000020633	RUNX3	chr1:24919344:24927574:clu_26659_?:ENSG00000020633	T	C	-37295	0.494792	69	95	1.88867e-06	0.663003	0.129858	1.67527e-07	0.0141016	9.17105e-06
1	24931810	1:24931810:G:T	ENSG00000020633	RUNX3	chr1:24924989:24927574:clu_26659_?:ENSG00000020633	T	G	-33311	0.484375	68	93	5.99758e-07	-0.766211	0.142328	1.67527e-07	0.0141016	9.17105e-06
1	24931810	1:24931810:G:T	ENSG00000020633	RUNX3	chr1:24919344:24927574:clu_26659_?:ENSG00000020633	T	G	-33311	0.484375	68	93	2.16409e-06	0.661091	0.130337	1.67527e-07	0.0141016	9.17105e-06
1	24932094	1:24932094:G:C	ENSG00000020633	RUNX3	chr1:24924989:24927574:clu_26659_?:ENSG00000020633	C	G	-33027	0.473958	66	91	4.76437e-06	-0.707828	0.145162	1.67527e-07	0.0141016	9.17105e-06
1	24932094	1:24932094:G:C	ENSG00000020633	RUNX3	chr1:24919344:24927574:clu_26659_?:ENSG00000020633	C	G	-33027	0.473958	66	91	4.81547e-06	0.63884	0.131086	1.67527e-07	0.0141016	9.17105e-06
1	24932376	1:24932376:G:C	ENSG00000020633	RUNX3	chr1:24924989:24927574:clu_26659_?:ENSG00000020633	C	G	-32745	0.484375	68	93	5.99758e-07	-0.766211	0.142328	1.67527e-07	0.0141016	9.17105e-06
1	24932376	1:24932376:G:C	ENSG00000020633	RUNX3	chr1:24919344:24927574:clu_26659_?:ENSG00000020633	C	G	-32745	0.484375	68	93	2.16409e-06	0.661091	0.130337	1.67527e-07	0.0141016	9.17105e-06
1	24933393	1:24933393:C:G	ENSG00000020633	RUNX3	chr1:24919344:24927574:clu_26659_?:ENSG00000020633	G	C	-31728	0.473958	66	91	4.81547e-06	0.63884	0.131086	1.67527e-07	0.0141016	9.17105e-06
1	24933393	1:24933393:C:G	ENSG00000020633	RUNX3	chr1:24924989:24927574:clu_26659_?:ENSG00000020633	G	C	-31728	0.473958	66	91	4.76437e-06	-0.707828	0.145162	1.67527e-07	0.0141016	9.17105e-06
1	24934712	1:24934712:T:C	ENSG00000020633	RUNX3	chr1:24919344:24927574:clu_26659_?:ENSG00000020633	C	T	-30409	0.489583	68	94	4.09217e-06	0.633581	0.128928	1.67527e-07	0.0141016	9.17105e-06
1	24934712	1:24934712:T:C	ENSG00000020633	RUNX3	chr1:24924989:24927574:clu_26659_?:ENSG00000020633	C	T	-30409	0.489583	68	94	1.62546e-06	-0.726876	0.141351	1.67527e-07	0.0141016	9.17105e-06
1	24934895	1:24934895:T:C	ENSG00000020633	RUNX3	chr1:24919344:24927574:clu_26659_?:ENSG00000020633	C	T	-30226	0.479167	66	92	8.98386e-06	0.610607	0.129485	1.67527e-07	0.0141016	9.17105e-06
1	24935205	1:24935205:A:G	ENSG00000020633	RUNX3	chr1:24924989:24927574:clu_26659_?:ENSG00000020633	G	A	-29916	0.479167	67	92	2.19555e-06	-0.734854	0.144981	1.67527e-07	0.0141016	9.17105e-06
1	24935205	1:24935205:A:G	ENSG00000020633	RUNX3	chr1:24919344:24927574:clu_26659_?:ENSG00000020633	G	A	-29916	0.479167	67	92	7.96503e-06	0.630158	0.132767	1.67527e-07	0.0141016	9.17105e-06
1	24935249	1:24935249:A:G	ENSG00000020633	RUNX3	chr1:24924989:24927574:clu_26659_?:ENSG00000020633	G	A	-29872	0.489583	68	94	1.62546e-06	-0.726876	0.141351	1.67527e-07	0.0141016	9.17105e-06
1	24935249	1:24935249:A:G	ENSG00000020633	RUNX3	chr1:24919344:24927574:clu_26659_?:ENSG00000020633	G	A	-29872	0.489583	68	94	4.09217e-06	0.633581	0.128928	1.67527e-07	0.0141016	9.17105e-06
1	24935531	1:24935531:C:A	ENSG00000020633	RUNX3	chr1:24919344:24927574:clu_26659_?:ENSG00000020633	A	C	-29590	0.359375	49	69	8.28165e-06	0.734694	0.155116	1.67527e-07	0.0141016	9.17105e-06
1	32606350	1:32606350:G:A	ENSG00000176261	ZBTB8OS	chr1:32634792:32650433:clu_27016_?:ENSG00000176261	A	G	-44553	0.151042	24	29	3.89976e-09	-1.14533	0.175108	4.65021e-10	4.86143e-05	2.89363e-05
1	32609316	1:32609316:A:G	ENSG00000176261	ZBTB8OS	chr1:32634792:32650433:clu_27016_?:ENSG00000176261	G	A	-41587	0.114583	20	22	1.87627e-05	-0.993886	0.219611	4.65021e-10	4.86143e-05	2.89363e-05
1	32611578	1:32611578:A:G	ENSG00000176261	ZBTB8OS	chr1:32634792:32650433:clu_27016_?:ENSG00000176261	G	A	-39325	0.114583	20	22	1.87627e-05	-0.993886	0.219611	4.65021e-10	4.86143e-05	2.89363e-05
1	32612130	1:32612130:C:G	ENSG00000176261	ZBTB8OS	chr1:32634792:32650433:clu_27016_?:ENSG00000176261	G	C	-38773	0.114583	20	22	1.87627e-05	-0.993886	0.219611	4.65021e-10	4.86143e-05	2.89363e-05
1	32612643	1:32612643:C:T	ENSG00000176261	ZBTB8OS	chr1:32634792:32650433:clu_27016_?:ENSG00000176261	T	C	-38260	0.114583	20	22	1.87627e-05	-0.993886	0.219611	4.65021e-10	4.86143e-05	2.89363e-05
1	32613636	1:32613636:C:A	ENSG00000176261	ZBTB8OS	chr1:32634792:32650433:clu_27016_?:ENSG00000176261	A	C	-37267	0.151042	24	29	3.89976e-09	-1.14533	0.175108	4.65021e-10	4.86143e-05	2.89363e-05
1	32613919	1:32613919:T:C	ENSG00000176261	ZBTB8OS	chr1:32634792:32650433:clu_27016_?:ENSG00000176261	C	T	-36984	0.114583	20	22	1.87627e-05	-0.993886	0.219611	4.65021e-10	4.86143e-05	2.89363e-05
1	32616440	1:32616440:C:T	ENSG00000176261	ZBTB8OS	chr1:32634792:32650433:clu_27016_?:ENSG00000176261	T	C	-34463	0.119792	21	23	1.0284e-06	-1.10569	0.210461	4.65021e-10	4.86143e-05	2.89363e-05
1	32616812	1:32616812:A:G	ENSG00000176261	ZBTB8OS	chr1:32634792:32650433:clu_27016_?:ENSG00000176261	G	A	-34091	0.119792	21	23	1.0284e-06	-1.10569	0.210461	4.65021e-10	4.86143e-05	2.89363e-05
1	32617009	1:32617009:C:T	ENSG00000176261	ZBTB8OS	chr1:32634792:32650433:clu_27016_?:ENSG00000176261	T	C	-33894	0.114583	20	22	1.87627e-05	-0.993886	0.219611	4.65021e-10	4.86143e-05	2.89363e-05
1	32617220	1:32617220:C:T	ENSG00000176261	ZBTB8OS	chr1:32634792:32650433:clu_27016_?:ENSG00000176261	T	C	-33683	0.114583	20	22	1.87627e-05	-0.993886	0.219611	4.65021e-10	4.86143e-05	2.89363e-05
1	32617620	1:32617620:C:T	ENSG00000176261	ZBTB8OS	chr1:32634792:32650433:clu_27016_?:ENSG00000176261	T	C	-33283	0.114583	20	22	1.87627e-05	-0.993886	0.219611	4.65021e-10	4.86143e-05	2.89363e-05
1	32621183	1:32621183:A:G	ENSG00000176261	ZBTB8OS	chr1:32634792:32650433:clu_27016_?:ENSG00000176261	G	A	-29720	0.0833333	14	16	1.1701e-06	-1.26202	0.241656	4.65021e-10	4.86143e-05	2.89363e-05
1	32621836	1:32621836:G:A	ENSG00000176261	ZBTB8OS	chr1:32634792:32650433:clu_27016_?:ENSG00000176261	A	G	-29067	0.125	19	24	1.66035e-06	-0.938254	0.182641	4.65021e-10	4.86143e-05	2.89363e-05
1	32622840	1:32622840:A:C	ENSG00000176261	ZBTB8OS	chr1:32634792:32650433:clu_27016_?:ENSG00000176261	C	A	-28063	0.15625	24	30	4.65021e-10	-1.13231	0.161556	4.65021e-10	4.86143e-05	2.89363e-05
1	32624794	1:32624794:A:G	ENSG00000176261	ZBTB8OS	chr1:32634792:32650433:clu_27016_?:ENSG00000176261	G	A	-26109	0.135417	21	26	4.08753e-07	-0.982243	0.17941	4.65021e-10	4.86143e-05	2.89363e-05
1	32624851	1:32624851:A:G	ENSG00000176261	ZBTB8OS	chr1:32634792:32650433:clu_27016_?:ENSG00000176261	G	A	-26052	0.15625	24	30	4.65021e-10	-1.13231	0.161556	4.65021e-10	4.86143e-05	2.89363e-05
1	32624949	1:32624949:T:C	ENSG00000176261	ZBTB8OS	chr1:32634792:32650433:clu_27016_?:ENSG00000176261	C	T	-25954	0.125	19	24	1.66035e-06	-0.938254	0.182641	4.65021e-10	4.86143e-05	2.89363e-05
1	32624964	1:32624964:T:C	ENSG00000176261	ZBTB8OS	chr1:32634792:32650433:clu_27016_?:ENSG00000176261	C	T	-25939	0.15625	24	30	4.65021e-10	-1.13231	0.161556	4.65021e-10	4.86143e-05	2.89363e-05
1	32625640	1:32625640:A:G	ENSG00000176261	ZBTB8OS	chr1:32634792:32650433:clu_27016_?:ENSG00000176261	G	A	-25263	0.15625	24	30	4.65021e-10	-1.13231	0.161556	4.65021e-10	4.86143e-05	2.89363e-05
1	32625997	1:32625997:C:T	ENSG00000176261	ZBTB8OS	chr1:32634792:32650433:clu_27016_?:ENSG00000176261	T	C	-24906	0.109375	18	21	1.07557e-05	-0.954916	0.204496	4.65021e-10	4.86143e-05	2.89363e-05
1	32626361	1:32626361:C:T	ENSG00000176261	ZBTB8OS	chr1:32634792:32650433:clu_27016_?:ENSG00000176261	T	C	-24542	0.15625	24	30	4.65021e-10	-1.13231	0.161556	4.65021e-10	4.86143e-05	2.89363e-05
1	32628328	1:32628328:C:G	ENSG00000176261	ZBTB8OS	chr1:32634792:32650433:clu_27016_?:ENSG00000176261	G	C	-22575	0.15625	24	30	4.65021e-10	-1.13231	0.161556	4.65021e-10	4.86143e-05	2.89363e-05
1	32629236	1:32629236:C:T	ENSG00000176261	ZBTB8OS	chr1:32634792:32650433:clu_27016_?:ENSG00000176261	T	C	-21667	0.109375	18	21	1.07557e-05	-0.954916	0.204496	4.65021e-10	4.86143e-05	2.89363e-05
1	32629360	1:32629360:G:A	ENSG00000176261	ZBTB8OS	chr1:32634792:32650433:clu_27016_?:ENSG00000176261	A	G	-21543	0.109375	18	21	1.07557e-05	-0.954916	0.204496	4.65021e-10	4.86143e-05	2.89363e-05
1	32629436	1:32629436:A:G	ENSG00000176261	ZBTB8OS	chr1:32634792:32650433:clu_27016_?:ENSG00000176261	G	A	-21467	0.125	19	24	1.66035e-06	-0.938254	0.182641	4.65021e-10	4.86143e-05	2.89363e-05
1	32629621	1:32629621:A:G	ENSG00000176261	ZBTB8OS	chr1:32634792:32650433:clu_27016_?:ENSG00000176261	G	A	-21282	0.125	19	24	1.66035e-06	-0.938254	0.182641	4.65021e-10	4.86143e-05	2.89363e-05
1	32630433	1:32630433:G:T	ENSG00000176261	ZBTB8OS	chr1:32634792:32650433:clu_27016_?:ENSG00000176261	T	G	-20470	0.109375	18	21	1.07557e-05	-0.954916	0.204496	4.65021e-10	4.86143e-05	2.89363e-05
1	32630761	1:32630761:G:A	ENSG00000176261	ZBTB8OS	chr1:32634792:32650433:clu_27016_?:ENSG00000176261	A	G	-20142	0.109375	18	21	1.07557e-05	-0.954916	0.204496	4.65021e-10	4.86143e-05	2.89363e-05
1	32632720	1:32632720:T:C	ENSG00000176261	ZBTB8OS	chr1:32634792:32650433:clu_27016_?:ENSG00000176261	C	T	-18183	0.125	19	24	1.66035e-06	-0.938254	0.182641	4.65021e-10	4.86143e-05	2.89363e-05
1	32633186	1:32633186:A:C	ENSG00000176261	ZBTB8OS	chr1:32634792:32650433:clu_27016_?:ENSG00000176261	C	A	-17717	0.15625	24	30	4.65021e-10	-1.13231	0.161556	4.65021e-10	4.86143e-05	2.89363e-05
1	32634036	1:32634036:A:G	ENSG00000176261	ZBTB8OS	chr1:32634792:32650433:clu_27016_?:ENSG00000176261	G	A	-16867	0.15625	24	30	4.65021e-10	-1.13231	0.161556	4.65021e-10	4.86143e-05	2.89363e-05
1	32634993	1:32634993:C:G	ENSG00000176261	ZBTB8OS	chr1:32634792:32650433:clu_27016_?:ENSG00000176261	G	C	-15910	0.135417	21	26	4.08753e-07	-0.982243	0.17941	4.65021e-10	4.86143e-05	2.89363e-05
1	32635214	1:32635214:C:T	ENSG00000176261	ZBTB8OS	chr1:32634792:32650433:clu_27016_?:ENSG00000176261	T	C	-15689	0.125	19	24	1.66035e-06	-0.938254	0.182641	4.65021e-10	4.86143e-05	2.89363e-05
1	32636721	1:32636721:A:G	ENSG00000176261	ZBTB8OS	chr1:32634792:32650433:clu_27016_?:ENSG00000176261	G	A	-14182	0.15625	24	30	4.65021e-10	-1.13231	0.161556	4.65021e-10	4.86143e-05	2.89363e-05
1	32637463	1:32637463:G:A	ENSG00000176261	ZBTB8OS	chr1:32634792:32650433:clu_27016_?:ENSG00000176261	A	G	-13440	0.109375	18	21	1.07557e-05	-0.954916	0.204496	4.65021e-10	4.86143e-05	2.89363e-05
1	32637724	1:32637724:A:G	ENSG00000176261	ZBTB8OS	chr1:32634792:32650433:clu_27016_?:ENSG00000176261	G	A	-13179	0.161458	25	31	2.17324e-08	-1.04706	0.170115	4.65021e-10	4.86143e-05	2.89363e-05
1	32638597	1:32638597:T:A	ENSG00000176261	ZBTB8OS	chr1:32634792:32650433:clu_27016_?:ENSG00000176261	T	A	-12306	0.869792	20	25	1.51183e-06	0.949262	0.183964	4.65021e-10	4.86143e-05	2.89363e-05
1	32639310	1:32639310:A:T	ENSG00000176261	ZBTB8OS	chr1:32634792:32650433:clu_27016_?:ENSG00000176261	A	T	-11593	0.854167	22	28	2.12925e-05	0.816415	0.181725	4.65021e-10	4.86143e-05	2.89363e-05
1	32639676	1:32639676:C:T	ENSG00000176261	ZBTB8OS	chr1:32634792:32650433:clu_27016_?:ENSG00000176261	C	T	-11227	0.869792	20	25	1.51183e-06	0.949262	0.183964	4.65021e-10	4.86143e-05	2.89363e-05
1	32639851	1:32639851:T:C	ENSG00000176261	ZBTB8OS	chr1:32634792:32650433:clu_27016_?:ENSG00000176261	C	T	-11052	0.114583	19	22	1.09508e-05	-0.958867	0.205546	4.65021e-10	4.86143e-05	2.89363e-05
1	32640187	1:32640187:C:T	ENSG00000176261	ZBTB8OS	chr1:32634792:32650433:clu_27016_?:ENSG00000176261	T	C	-10716	0.114583	19	22	1.09508e-05	-0.958867	0.205546	4.65021e-10	4.86143e-05	2.89363e-05
1	32640254	1:32640254:G:A	ENSG00000176261	ZBTB8OS	chr1:32634792:32650433:clu_27016_?:ENSG00000176261	A	G	-10649	0.114583	19	22	1.09508e-05	-0.958867	0.205546	4.65021e-10	4.86143e-05	2.89363e-05
1	32640642	1:32640642:A:G	ENSG00000176261	ZBTB8OS	chr1:32634792:32650433:clu_27016_?:ENSG00000176261	A	G	-10261	0.869792	20	25	1.51183e-06	0.949262	0.183964	4.65021e-10	4.86143e-05	2.89363e-05
1	32641150	1:32641150:C:G	ENSG00000176261	ZBTB8OS	chr1:32634792:32650433:clu_27016_?:ENSG00000176261	C	G	-9753	0.869792	20	25	1.51183e-06	0.949262	0.183964	4.65021e-10	4.86143e-05	2.89363e-05
1	32641155	1:32641155:G:C	ENSG00000176261	ZBTB8OS	chr1:32634792:32650433:clu_27016_?:ENSG00000176261	G	C	-9748	0.869792	20	25	1.51183e-06	0.949262	0.183964	4.65021e-10	4.86143e-05	2.89363e-05
1	32641496	1:32641496:C:T	ENSG00000176261	ZBTB8OS	chr1:32634792:32650433:clu_27016_?:ENSG00000176261	C	T	-9407	0.833333	25	32	6.72415e-08	0.989504	0.167802	4.65021e-10	4.86143e-05	2.89363e-05
1	32641894	1:32641894:A:T	ENSG00000176261	ZBTB8OS	chr1:32634792:32650433:clu_27016_?:ENSG00000176261	A	T	-9009	0.869792	20	25	1.51183e-06	0.949262	0.183964	4.65021e-10	4.86143e-05	2.89363e-05
1	32642950	1:32642950:T:C	ENSG00000176261	ZBTB8OS	chr1:32634792:32650433:clu_27016_?:ENSG00000176261	T	C	-7953	0.859375	22	27	3.93985e-06	0.880327	0.178794	4.65021e-10	4.86143e-05	2.89363e-05
1	32643251	1:32643251:T:G	ENSG00000176261	ZBTB8OS	chr1:32634792:32650433:clu_27016_?:ENSG00000176261	T	G	-7652	0.869792	20	25	1.51183e-06	0.949262	0.183964	4.65021e-10	4.86143e-05	2.89363e-05
1	32643436	1:32643436:A:G	ENSG00000176261	ZBTB8OS	chr1:32634792:32650433:clu_27016_?:ENSG00000176261	A	G	-7467	0.833333	25	32	6.72415e-08	0.989504	0.167802	4.65021e-10	4.86143e-05	2.89363e-05
1	32644373	1:32644373:G:T	ENSG00000176261	ZBTB8OS	chr1:32634792:32650433:clu_27016_?:ENSG00000176261	G	T	-6530	0.869792	20	25	1.51183e-06	0.949262	0.183964	4.65021e-10	4.86143e-05	2.89363e-05
1	32644859	1:32644859:C:T	ENSG00000176261	ZBTB8OS	chr1:32634792:32650433:clu_27016_?:ENSG00000176261	C	T	-6044	0.833333	25	32	6.72415e-08	0.989504	0.167802	4.65021e-10	4.86143e-05	2.89363e-05
1	32646973	1:32646973:C:T	ENSG00000176261	ZBTB8OS	chr1:32634792:32650433:clu_27016_?:ENSG00000176261	T	C	-3930	0.109375	18	21	1.30978e-05	-0.965184	0.208963	4.65021e-10	4.86143e-05	2.89363e-05
1	32650943	1:32650943:C:T	ENSG00000176261	ZBTB8OS	chr1:32634792:32650433:clu_27016_?:ENSG00000176261	C	T	40	0.833333	25	32	6.72415e-08	0.989504	0.167802	4.65021e-10	4.86143e-05	2.89363e-05
1	32651022	1:32651022:T:G	ENSG00000176261	ZBTB8OS	chr1:32634792:32650433:clu_27016_?:ENSG00000176261	T	G	119	0.833333	25	32	6.72415e-08	0.989504	0.167802	4.65021e-10	4.86143e-05	2.89363e-05
1	32651632	1:32651632:G:A	ENSG00000176261	ZBTB8OS	chr1:32634792:32650433:clu_27016_?:ENSG00000176261	A	G	729	0.114583	19	22	1.09508e-05	-0.958867	0.205546	4.65021e-10	4.86143e-05	2.89363e-05
1	32653992	1:32653992:A:G	ENSG00000176261	ZBTB8OS	chr1:32634792:32650433:clu_27016_?:ENSG00000176261	A	G	3089	0.869792	20	25	1.51183e-06	0.949262	0.183964	4.65021e-10	4.86143e-05	2.89363e-05
1	32654713	1:32654713:G:T	ENSG00000176261	ZBTB8OS	chr1:32634792:32650433:clu_27016_?:ENSG00000176261	T	G	3810	0.114583	19	22	1.09508e-05	-0.958867	0.205546	4.65021e-10	4.86143e-05	2.89363e-05
1	32654789	1:32654789:G:T	ENSG00000176261	ZBTB8OS	chr1:32634792:32650433:clu_27016_?:ENSG00000176261	T	G	3886	0.114583	19	22	1.09508e-05	-0.958867	0.205546	4.65021e-10	4.86143e-05	2.89363e-05
1	32655245	1:32655245:G:A	ENSG00000176261	ZBTB8OS	chr1:32634792:32650433:clu_27016_?:ENSG00000176261	A	G	4342	0.114583	19	22	1.09508e-05	-0.958867	0.205546	4.65021e-10	4.86143e-05	2.89363e-05
1	32655440	1:32655440:A:G	ENSG00000176261	ZBTB8OS	chr1:32634792:32650433:clu_27016_?:ENSG00000176261	A	G	4537	0.869792	20	25	1.51183e-06	0.949262	0.183964	4.65021e-10	4.86143e-05	2.89363e-05
1	32655975	1:32655975:C:T	ENSG00000176261	ZBTB8OS	chr1:32634792:32650433:clu_27016_?:ENSG00000176261	C	T	5072	0.869792	20	25	1.51183e-06	0.949262	0.183964	4.65021e-10	4.86143e-05	2.89363e-05
1	32656404	1:32656404:G:A	ENSG00000176261	ZBTB8OS	chr1:32634792:32650433:clu_27016_?:ENSG00000176261	A	G	5501	0.114583	19	22	1.09508e-05	-0.958867	0.205546	4.65021e-10	4.86143e-05	2.89363e-05
1	32658519	1:32658519:T:A	ENSG00000176261	ZBTB8OS	chr1:32634792:32650433:clu_27016_?:ENSG00000176261	T	A	7616	0.833333	25	32	6.72415e-08	0.989504	0.167802	4.65021e-10	4.86143e-05	2.89363e-05
1	32658607	1:32658607:C:T	ENSG00000176261	ZBTB8OS	chr1:32634792:32650433:clu_27016_?:ENSG00000176261	T	C	7704	0.114583	19	22	1.09508e-05	-0.958867	0.205546	4.65021e-10	4.86143e-05	2.89363e-05
1	32658610	1:32658610:G:A	ENSG00000176261	ZBTB8OS	chr1:32634792:32650433:clu_27016_?:ENSG00000176261	G	A	7707	0.833333	25	32	6.72415e-08	0.989504	0.167802	4.65021e-10	4.86143e-05	2.89363e-05
1	32658767	1:32658767:C:T	ENSG00000176261	ZBTB8OS	chr1:32634792:32650433:clu_27016_?:ENSG00000176261	T	C	7864	0.114583	19	22	1.09508e-05	-0.958867	0.205546	4.65021e-10	4.86143e-05	2.89363e-05
1	32658983	1:32658983:G:A	ENSG00000176261	ZBTB8OS	chr1:32634792:32650433:clu_27016_?:ENSG00000176261	A	G	8080	0.114583	19	22	1.09508e-05	-0.958867	0.205546	4.65021e-10	4.86143e-05	2.89363e-05
1	32663776	1:32663776:C:T	ENSG00000176261	ZBTB8OS	chr1:32634792:32650433:clu_27016_?:ENSG00000176261	T	C	12873	0.114583	19	22	1.09508e-05	-0.958867	0.205546	4.65021e-10	4.86143e-05	2.89363e-05
1	32664705	1:32664705:C:G	ENSG00000176261	ZBTB8OS	chr1:32634792:32650433:clu_27016_?:ENSG00000176261	C	G	13802	0.869792	20	25	1.51183e-06	0.949262	0.183964	4.65021e-10	4.86143e-05	2.89363e-05
1	32665108	1:32665108:A:G	ENSG00000176261	ZBTB8OS	chr1:32634792:32650433:clu_27016_?:ENSG00000176261	G	A	14205	0.114583	19	22	1.09508e-05	-0.958867	0.205546	4.65021e-10	4.86143e-05	2.89363e-05
1	32665412	1:32665412:T:G	ENSG00000176261	ZBTB8OS	chr1:32634792:32650433:clu_27016_?:ENSG00000176261	T	G	14509	0.833333	25	32	6.72415e-08	0.989504	0.167802	4.65021e-10	4.86143e-05	2.89363e-05
1	32665805	1:32665805:C:T	ENSG00000176261	ZBTB8OS	chr1:32634792:32650433:clu_27016_?:ENSG00000176261	C	T	14902	0.869792	20	25	1.51183e-06	0.949262	0.183964	4.65021e-10	4.86143e-05	2.89363e-05
1	32665989	1:32665989:A:G	ENSG00000176261	ZBTB8OS	chr1:32634792:32650433:clu_27016_?:ENSG00000176261	A	G	15086	0.869792	20	25	1.51183e-06	0.949262	0.183964	4.65021e-10	4.86143e-05	2.89363e-05
1	32665995	1:32665995:G:A	ENSG00000176261	ZBTB8OS	chr1:32634792:32650433:clu_27016_?:ENSG00000176261	G	A	15092	0.833333	25	32	6.72415e-08	0.989504	0.167802	4.65021e-10	4.86143e-05	2.89363e-05
1	32669388	1:32669388:A:G	ENSG00000176261	ZBTB8OS	chr1:32634792:32650433:clu_27016_?:ENSG00000176261	A	G	18485	0.833333	25	32	6.72415e-08	0.989504	0.167802	4.65021e-10	4.86143e-05	2.89363e-05
1	32669774	1:32669774:C:G	ENSG00000176261	ZBTB8OS	chr1:32634792:32650433:clu_27016_?:ENSG00000176261	G	C	18871	0.114583	19	22	1.09508e-05	-0.958867	0.205546	4.65021e-10	4.86143e-05	2.89363e-05
1	32669922	1:32669922:A:G	ENSG00000176261	ZBTB8OS	chr1:32634792:32650433:clu_27016_?:ENSG00000176261	A	G	19019	0.833333	25	32	6.72415e-08	0.989504	0.167802	4.65021e-10	4.86143e-05	2.89363e-05
1	32670694	1:32670694:T:C	ENSG00000176261	ZBTB8OS	chr1:32634792:32650433:clu_27016_?:ENSG00000176261	T	C	19791	0.833333	25	32	6.72415e-08	0.989504	0.167802	4.65021e-10	4.86143e-05	2.89363e-05
1	32672327	1:32672327:A:G	ENSG00000176261	ZBTB8OS	chr1:32634792:32650433:clu_27016_?:ENSG00000176261	A	G	21424	0.833333	25	32	6.72415e-08	0.989504	0.167802	4.65021e-10	4.86143e-05	2.89363e-05
1	32673004	1:32673004:T:C	ENSG00000176261	ZBTB8OS	chr1:32634792:32650433:clu_27016_?:ENSG00000176261	T	C	22101	0.880208	18	23	1.17475e-05	0.848542	0.182602	4.65021e-10	4.86143e-05	2.89363e-05
1	32673442	1:32673442:C:T	ENSG00000176261	ZBTB8OS	chr1:32634792:32650433:clu_27016_?:ENSG00000176261	C	T	22539	0.880208	18	23	1.17475e-05	0.848542	0.182602	4.65021e-10	4.86143e-05	2.89363e-05
1	32673687	1:32673687:C:G	ENSG00000176261	ZBTB8OS	chr1:32634792:32650433:clu_27016_?:ENSG00000176261	C	G	22784	0.880208	18	23	1.17475e-05	0.848542	0.182602	4.65021e-10	4.86143e-05	2.89363e-05
1	32677093	1:32677093:C:T	ENSG00000176261	ZBTB8OS	chr1:32634792:32650433:clu_27016_?:ENSG00000176261	T	C	26190	0.114583	19	22	1.09508e-05	-0.958867	0.205546	4.65021e-10	4.86143e-05	2.89363e-05
1	32677270	1:32677270:G:A	ENSG00000176261	ZBTB8OS	chr1:32634792:32650433:clu_27016_?:ENSG00000176261	G	A	26367	0.869792	20	25	1.51183e-06	0.949262	0.183964	4.65021e-10	4.86143e-05	2.89363e-05
1	32678305	1:32678305:C:A	ENSG00000176261	ZBTB8OS	chr1:32634792:32650433:clu_27016_?:ENSG00000176261	C	A	27402	0.869792	20	25	1.51183e-06	0.949262	0.183964	4.65021e-10	4.86143e-05	2.89363e-05
1	32678469	1:32678469:C:A	ENSG00000176261	ZBTB8OS	chr1:32634792:32650433:clu_27016_?:ENSG00000176261	C	A	27566	0.833333	25	32	6.72415e-08	0.989504	0.167802	4.65021e-10	4.86143e-05	2.89363e-05
1	32678941	1:32678941:G:A	ENSG00000176261	ZBTB8OS	chr1:32634792:32650433:clu_27016_?:ENSG00000176261	G	A	28038	0.833333	25	32	6.72415e-08	0.989504	0.167802	4.65021e-10	4.86143e-05	2.89363e-05
1	32680900	1:32680900:A:G	ENSG00000176261	ZBTB8OS	chr1:32634792:32650433:clu_27016_?:ENSG00000176261	A	G	29997	0.869792	20	25	1.51183e-06	0.949262	0.183964	4.65021e-10	4.86143e-05	2.89363e-05
1	32681578	1:32681578:A:T	ENSG00000176261	ZBTB8OS	chr1:32634792:32650433:clu_27016_?:ENSG00000176261	T	A	30675	0.114583	19	22	1.09508e-05	-0.958867	0.205546	4.65021e-10	4.86143e-05	2.89363e-05
1	32684997	1:32684997:T:C	ENSG00000176261	ZBTB8OS	chr1:32634792:32650433:clu_27016_?:ENSG00000176261	T	C	34094	0.833333	25	32	6.72415e-08	0.989504	0.167802	4.65021e-10	4.86143e-05	2.89363e-05
1	32685042	1:32685042:G:A	ENSG00000176261	ZBTB8OS	chr1:32634792:32650433:clu_27016_?:ENSG00000176261	G	A	34139	0.869792	20	25	1.51183e-06	0.949262	0.183964	4.65021e-10	4.86143e-05	2.89363e-05
1	32685350	1:32685350:T:C	ENSG00000176261	ZBTB8OS	chr1:32634792:32650433:clu_27016_?:ENSG00000176261	T	C	34447	0.869792	20	25	1.51183e-06	0.949262	0.183964	4.65021e-10	4.86143e-05	2.89363e-05
1	32687936	1:32687936:A:G	ENSG00000176261	ZBTB8OS	chr1:32634792:32650433:clu_27016_?:ENSG00000176261	G	A	37033	0.114583	19	22	1.09508e-05	-0.958867	0.205546	4.65021e-10	4.86143e-05	2.89363e-05
1	32688732	1:32688732:A:G	ENSG00000176261	ZBTB8OS	chr1:32634792:32650433:clu_27016_?:ENSG00000176261	A	G	37829	0.869792	20	25	1.51183e-06	0.949262	0.183964	4.65021e-10	4.86143e-05	2.89363e-05
1	32688766	1:32688766:C:T	ENSG00000176261	ZBTB8OS	chr1:32634792:32650433:clu_27016_?:ENSG00000176261	C	T	37863	0.838542	24	31	2.02529e-09	1.06872	0.159847	4.65021e-10	4.86143e-05	2.89363e-05
1	32689481	1:32689481:C:A	ENSG00000176261	ZBTB8OS	chr1:32634792:32650433:clu_27016_?:ENSG00000176261	C	A	38578	0.869792	20	25	1.51183e-06	0.949262	0.183964	4.65021e-10	4.86143e-05	2.89363e-05
1	32690569	1:32690569:G:A	ENSG00000176261	ZBTB8OS	chr1:32634792:32650433:clu_27016_?:ENSG00000176261	G	A	39666	0.869792	20	25	1.51183e-06	0.949262	0.183964	4.65021e-10	4.86143e-05	2.89363e-05
1	32691830	1:32691830:T:C	ENSG00000176261	ZBTB8OS	chr1:32634792:32650433:clu_27016_?:ENSG00000176261	T	C	40927	0.854167	22	28	2.12925e-05	0.816415	0.181725	4.65021e-10	4.86143e-05	2.89363e-05
1	32692003	1:32692003:C:T	ENSG00000176261	ZBTB8OS	chr1:32634792:32650433:clu_27016_?:ENSG00000176261	T	C	41100	0.114583	19	22	1.09508e-05	-0.958867	0.205546	4.65021e-10	4.86143e-05	2.89363e-05
1	32692094	1:32692094:C:T	ENSG00000176261	ZBTB8OS	chr1:32634792:32650433:clu_27016_?:ENSG00000176261	C	T	41191	0.833333	25	32	6.72415e-08	0.989504	0.167802	4.65021e-10	4.86143e-05	2.89363e-05
1	32692263	1:32692263:C:T	ENSG00000176261	ZBTB8OS	chr1:32634792:32650433:clu_27016_?:ENSG00000176261	T	C	41360	0.114583	19	22	1.09508e-05	-0.958867	0.205546	4.65021e-10	4.86143e-05	2.89363e-05
1	32693284	1:32693284:T:C	ENSG00000176261	ZBTB8OS	chr1:32634792:32650433:clu_27016_?:ENSG00000176261	T	C	42381	0.833333	25	32	6.72415e-08	0.989504	0.167802	4.65021e-10	4.86143e-05	2.89363e-05
1	32708264	1:32708264:A:G	ENSG00000176261	ZBTB8OS	chr1:32634792:32650433:clu_27016_?:ENSG00000176261	A	G	57361	0.828125	27	33	9.0772e-07	0.936448	0.177229	4.65021e-10	4.86143e-05	2.89363e-05
1	32708380	1:32708380:T:C	ENSG00000176261	ZBTB8OS	chr1:32634792:32650433:clu_27016_?:ENSG00000176261	T	C	57477	0.859375	22	27	3.35744e-06	0.920247	0.185401	4.65021e-10	4.86143e-05	2.89363e-05
1	38970826	1:38970826:C:T	ENSG00000168653	NDUFS5	chr1:39026402:39028723:clu_27195_?:ENSG00000168653	C	T	-55492	0.515625	65	93	1.6658e-08	-0.997901	0.160557	3.39373e-50	1.33059e-38	5.13929e-05
1	38970826	1:38970826:C:T	ENSG00000168653	NDUFS5	chr1:39026398:39028723:clu_27195_?:ENSG00000168653	C	T	-55492	0.515625	65	93	1.58177e-08	0.985471	0.158259	3.39373e-50	1.33059e-38	5.13929e-05
1	38973330	1:38973330:C:G	ENSG00000168653	NDUFS5	chr1:39026398:39028723:clu_27195_?:ENSG00000168653	C	G	-52988	0.630208	49	71	6.96307e-07	0.926813	0.173312	3.39373e-50	1.33059e-38	5.13929e-05
1	38973330	1:38973330:C:G	ENSG00000168653	NDUFS5	chr1:39026402:39028723:clu_27195_?:ENSG00000168653	C	G	-52988	0.630208	49	71	7.34654e-07	-0.93802	0.175831	3.39373e-50	1.33059e-38	5.13929e-05
1	38975230	1:38975230:A:C	ENSG00000168653	NDUFS5	chr1:39026398:39028723:clu_27195_?:ENSG00000168653	C	A	-51088	0.177083	28	34	7.57382e-07	0.966785	0.181472	3.39373e-50	1.33059e-38	5.13929e-05
1	38975230	1:38975230:A:C	ENSG00000168653	NDUFS5	chr1:39026402:39028723:clu_27195_?:ENSG00000168653	C	A	-51088	0.177083	28	34	6.86164e-07	-0.983553	0.183801	3.39373e-50	1.33059e-38	5.13929e-05
1	38976190	1:38976190:G:C	ENSG00000168653	NDUFS5	chr1:39026398:39028723:clu_27195_?:ENSG00000168653	C	G	-50128	0.473958	65	91	1.02134e-06	0.924783	0.17597	3.39373e-50	1.33059e-38	5.13929e-05
1	38976190	1:38976190:G:C	ENSG00000168653	NDUFS5	chr1:39026402:39028723:clu_27195_?:ENSG00000168653	C	G	-50128	0.473958	65	91	9.56284e-07	-0.93983	0.178294	3.39373e-50	1.33059e-38	5.13929e-05
1	38980548	1:38980548:C:T	ENSG00000168653	NDUFS5	chr1:39026398:39028723:clu_27195_?:ENSG00000168653	C	T	-45770	0.583333	54	80	6.67854e-11	1.10399	0.148601	3.39373e-50	1.33059e-38	5.13929e-05
1	38980548	1:38980548:C:T	ENSG00000168653	NDUFS5	chr1:39026402:39028723:clu_27195_?:ENSG00000168653	C	T	-45770	0.583333	54	80	7.11707e-11	-1.11811	0.150779	3.39373e-50	1.33059e-38	5.13929e-05
1	38981464	1:38981464:G:A	ENSG00000168653	NDUFS5	chr1:39026402:39028723:clu_27195_?:ENSG00000168653	G	A	-44854	0.583333	54	80	7.11707e-11	-1.11811	0.150779	3.39373e-50	1.33059e-38	5.13929e-05
1	38981464	1:38981464:G:A	ENSG00000168653	NDUFS5	chr1:39026398:39028723:clu_27195_?:ENSG00000168653	G	A	-44854	0.583333	54	80	6.67854e-11	1.10399	0.148601	3.39373e-50	1.33059e-38	5.13929e-05
1	38981941	1:38981941:G:A	ENSG00000168653	NDUFS5	chr1:39026402:39028723:clu_27195_?:ENSG00000168653	G	A	-44377	0.583333	54	80	7.11707e-11	-1.11811	0.150779	3.39373e-50	1.33059e-38	5.13929e-05
1	38981941	1:38981941:G:A	ENSG00000168653	NDUFS5	chr1:39026398:39028723:clu_27195_?:ENSG00000168653	G	A	-44377	0.583333	54	80	6.67854e-11	1.10399	0.148601	3.39373e-50	1.33059e-38	5.13929e-05
1	38982097	1:38982097:G:A	ENSG00000168653	NDUFS5	chr1:39026402:39028723:clu_27195_?:ENSG00000168653	A	G	-44221	0.25	40	48	6.57416e-09	-0.951739	0.148148	3.39373e-50	1.33059e-38	5.13929e-05
1	38982097	1:38982097:G:A	ENSG00000168653	NDUFS5	chr1:39026398:39028723:clu_27195_?:ENSG00000168653	A	G	-44221	0.25	40	48	9.04124e-09	0.93152	0.14663	3.39373e-50	1.33059e-38	5.13929e-05
1	38982942	1:38982942:G:A	ENSG00000168653	NDUFS5	chr1:39026402:39028723:clu_27195_?:ENSG00000168653	G	A	-43376	0.510417	67	94	1.65062e-08	-1.04724	0.168439	3.39373e-50	1.33059e-38	5.13929e-05
1	38982942	1:38982942:G:A	ENSG00000168653	NDUFS5	chr1:39026398:39028723:clu_27195_?:ENSG00000168653	G	A	-43376	0.510417	67	94	1.62056e-08	1.03332	0.16609	3.39373e-50	1.33059e-38	5.13929e-05
1	38985203	1:38985203:A:C	ENSG00000168653	NDUFS5	chr1:39026398:39028723:clu_27195_?:ENSG00000168653	C	A	-41115	0.192708	33	37	3.16939e-06	-0.950465	0.190938	3.39373e-50	1.33059e-38	5.13929e-05
1	38985203	1:38985203:A:C	ENSG00000168653	NDUFS5	chr1:39026402:39028723:clu_27195_?:ENSG00000168653	C	A	-41115	0.192708	33	37	2.95546e-06	0.966327	0.193451	3.39373e-50	1.33059e-38	5.13929e-05
1	38989754	1:38989754:C:T	ENSG00000168653	NDUFS5	chr1:39026398:39028723:clu_27195_?:ENSG00000168653	T	C	-36564	0.463542	64	89	1.00033e-11	1.10163	0.140585	3.39373e-50	1.33059e-38	5.13929e-05
1	38989754	1:38989754:C:T	ENSG00000168653	NDUFS5	chr1:39026402:39028723:clu_27195_?:ENSG00000168653	T	C	-36564	0.463542	64	89	4.2076e-12	-1.13225	0.141169	3.39373e-50	1.33059e-38	5.13929e-05
1	38992438	1:38992438:A:G	ENSG00000168653	NDUFS5	chr1:39026402:39028723:clu_27195_?:ENSG00000168653	G	A	-33880	0.333333	51	64	3.7962e-13	-1.13913	0.133538	3.39373e-50	1.33059e-38	5.13929e-05
1	38992438	1:38992438:A:G	ENSG00000168653	NDUFS5	chr1:39026398:39028723:clu_27195_?:ENSG00000168653	G	A	-33880	0.333333	51	64	6.01429e-13	1.11641	0.132384	3.39373e-50	1.33059e-38	5.13929e-05
1	38993209	1:38993209:C:G	ENSG00000168653	NDUFS5	chr1:39026402:39028723:clu_27195_?:ENSG00000168653	C	G	-33109	0.5625	70	84	2.19148e-10	-1.04799	0.146114	3.39373e-50	1.33059e-38	5.13929e-05
1	38993209	1:38993209:C:G	ENSG00000168653	NDUFS5	chr1:39026398:39028723:clu_27195_?:ENSG00000168653	C	G	-33109	0.5625	70	84	4.25558e-10	1.02032	0.145176	3.39373e-50	1.33059e-38	5.13929e-05
1	38999467	1:38999467:A:C	ENSG00000168653	NDUFS5	chr1:39026398:39028723:clu_27195_?:ENSG00000168653	C	A	-26851	0.244792	41	47	2.56654e-05	-0.756944	0.170348	3.39373e-50	1.33059e-38	5.13929e-05
1	38999467	1:38999467:A:C	ENSG00000168653	NDUFS5	chr1:39026402:39028723:clu_27195_?:ENSG00000168653	C	A	-26851	0.244792	41	47	1.14046e-05	0.796874	0.171203	3.39373e-50	1.33059e-38	5.13929e-05
1	38999473	1:38999473:C:T	ENSG00000168653	NDUFS5	chr1:39026402:39028723:clu_27195_?:ENSG00000168653	T	C	-26845	0.479167	68	92	1.04686e-06	0.744479	0.141823	3.39373e-50	1.33059e-38	5.13929e-05
1	38999473	1:38999473:C:T	ENSG00000168653	NDUFS5	chr1:39026398:39028723:clu_27195_?:ENSG00000168653	T	C	-26845	0.479167	68	92	2.12645e-06	-0.715613	0.140966	3.39373e-50	1.33059e-38	5.13929e-05
1	38999904	1:38999904:C:T	ENSG00000168653	NDUFS5	chr1:39026402:39028723:clu_27195_?:ENSG00000168653	C	T	-26414	0.53125	65	90	6.54122e-08	0.86491	0.146515	3.39373e-50	1.33059e-38	5.13929e-05
1	38999904	1:38999904:C:T	ENSG00000168653	NDUFS5	chr1:39026398:39028723:clu_27195_?:ENSG00000168653	C	T	-26414	0.53125	65	90	1.48864e-07	-0.833019	0.145821	3.39373e-50	1.33059e-38	5.13929e-05
1	39002352	1:39002352:T:C	ENSG00000168653	NDUFS5	chr1:39026402:39028723:clu_27195_?:ENSG00000168653	C	T	-23966	0.25	42	48	3.13959e-06	0.836215	0.167908	3.39373e-50	1.33059e-38	5.13929e-05
1	39002352	1:39002352:T:C	ENSG00000168653	NDUFS5	chr1:39026398:39028723:clu_27195_?:ENSG00000168653	C	T	-23966	0.25	42	48	7.55209e-06	-0.795838	0.167198	3.39373e-50	1.33059e-38	5.13929e-05
1	39003133	1:39003133:C:A	ENSG00000168653	NDUFS5	chr1:39026398:39028723:clu_27195_?:ENSG00000168653	C	A	-23185	0.53125	65	90	1.48864e-07	-0.833019	0.145821	3.39373e-50	1.33059e-38	5.13929e-05
1	39003133	1:39003133:C:A	ENSG00000168653	NDUFS5	chr1:39026402:39028723:clu_27195_?:ENSG00000168653	C	A	-23185	0.53125	65	90	6.54122e-08	0.86491	0.146515	3.39373e-50	1.33059e-38	5.13929e-05
1	39004692	1:39004692:A:G	ENSG00000168653	NDUFS5	chr1:39026398:39028723:clu_27195_?:ENSG00000168653	G	A	-21626	0.25	42	48	7.55209e-06	-0.795838	0.167198	3.39373e-50	1.33059e-38	5.13929e-05
1	39004692	1:39004692:A:G	ENSG00000168653	NDUFS5	chr1:39026402:39028723:clu_27195_?:ENSG00000168653	G	A	-21626	0.25	42	48	3.13959e-06	0.836215	0.167908	3.39373e-50	1.33059e-38	5.13929e-05
1	39008125	1:39008125:G:A	ENSG00000168653	NDUFS5	chr1:39026398:39028723:clu_27195_?:ENSG00000168653	A	G	-18193	0.338542	53	65	1.8945e-14	1.20491	0.131496	3.39373e-50	1.33059e-38	5.13929e-05
1	39008125	1:39008125:G:A	ENSG00000168653	NDUFS5	chr1:39026402:39028723:clu_27195_?:ENSG00000168653	A	G	-18193	0.338542	53	65	8.63794e-15	-1.23285	0.132157	3.39373e-50	1.33059e-38	5.13929e-05
1	39008200	1:39008200:G:A	ENSG00000168653	NDUFS5	chr1:39026402:39028723:clu_27195_?:ENSG00000168653	A	G	-18118	0.338542	53	65	8.63794e-15	-1.23285	0.132157	3.39373e-50	1.33059e-38	5.13929e-05
1	39008200	1:39008200:G:A	ENSG00000168653	NDUFS5	chr1:39026398:39028723:clu_27195_?:ENSG00000168653	A	G	-18118	0.338542	53	65	1.8945e-14	1.20491	0.131496	3.39373e-50	1.33059e-38	5.13929e-05
1	39008385	1:39008385:A:C	ENSG00000168653	NDUFS5	chr1:39026398:39028723:clu_27195_?:ENSG00000168653	C	A	-17933	0.25	42	48	7.55209e-06	-0.795838	0.167198	3.39373e-50	1.33059e-38	5.13929e-05
1	39008385	1:39008385:A:C	ENSG00000168653	NDUFS5	chr1:39026402:39028723:clu_27195_?:ENSG00000168653	C	A	-17933	0.25	42	48	3.13959e-06	0.836215	0.167908	3.39373e-50	1.33059e-38	5.13929e-05
1	39009553	1:39009553:G:T	ENSG00000168653	NDUFS5	chr1:39026402:39028723:clu_27195_?:ENSG00000168653	T	G	-16765	0.338542	53	65	8.63794e-15	-1.23285	0.132157	3.39373e-50	1.33059e-38	5.13929e-05
1	39009553	1:39009553:G:T	ENSG00000168653	NDUFS5	chr1:39026398:39028723:clu_27195_?:ENSG00000168653	T	G	-16765	0.338542	53	65	1.8945e-14	1.20491	0.131496	3.39373e-50	1.33059e-38	5.13929e-05
1	39011141	1:39011141:G:A	ENSG00000168653	NDUFS5	chr1:39026402:39028723:clu_27195_?:ENSG00000168653	A	G	-15177	0.25	42	48	3.13959e-06	0.836215	0.167908	3.39373e-50	1.33059e-38	5.13929e-05
1	39011141	1:39011141:G:A	ENSG00000168653	NDUFS5	chr1:39026398:39028723:clu_27195_?:ENSG00000168653	A	G	-15177	0.25	42	48	7.55209e-06	-0.795838	0.167198	3.39373e-50	1.33059e-38	5.13929e-05
1	39011963	1:39011963:T:G	ENSG00000168653	NDUFS5	chr1:39026402:39028723:clu_27195_?:ENSG00000168653	T	G	-14355	0.5625	61	84	1.2171e-11	1.01831	0.13065	3.39373e-50	1.33059e-38	5.13929e-05
1	39011963	1:39011963:T:G	ENSG00000168653	NDUFS5	chr1:39026398:39028723:clu_27195_?:ENSG00000168653	T	G	-14355	0.5625	61	84	2.61741e-11	-0.991668	0.129962	3.39373e-50	1.33059e-38	5.13929e-05
1	39013994	1:39013994:C:T	ENSG00000168653	NDUFS5	chr1:39026402:39028723:clu_27195_?:ENSG00000168653	T	C	-12324	0.380208	56	73	2.10519e-08	-0.887548	0.14403	3.39373e-50	1.33059e-38	5.13929e-05
1	39013994	1:39013994:C:T	ENSG00000168653	NDUFS5	chr1:39026398:39028723:clu_27195_?:ENSG00000168653	T	C	-12324	0.380208	56	73	3.13285e-08	0.866321	0.142678	3.39373e-50	1.33059e-38	5.13929e-05
1	39014867	1:39014867:C:T	ENSG00000168653	NDUFS5	chr1:39026398:39028723:clu_27195_?:ENSG00000168653	T	C	-11451	0.25	42	48	7.55209e-06	-0.795838	0.167198	3.39373e-50	1.33059e-38	5.13929e-05
1	39014867	1:39014867:C:T	ENSG00000168653	NDUFS5	chr1:39026402:39028723:clu_27195_?:ENSG00000168653	T	C	-11451	0.25	42	48	3.13959e-06	0.836215	0.167908	3.39373e-50	1.33059e-38	5.13929e-05
1	39016016	1:39016016:G:A	ENSG00000168653	NDUFS5	chr1:39026402:39028723:clu_27195_?:ENSG00000168653	A	G	-10302	0.09375	17	18	1.09828e-05	-1.17751	0.252455	3.39373e-50	1.33059e-38	5.13929e-05
1	39016016	1:39016016:G:A	ENSG00000168653	NDUFS5	chr1:39026398:39028723:clu_27195_?:ENSG00000168653	A	G	-10302	0.09375	17	18	1.53723e-05	1.14391	0.2499	3.39373e-50	1.33059e-38	5.13929e-05
1	39017259	1:39017259:G:A	ENSG00000168653	NDUFS5	chr1:39026398:39028723:clu_27195_?:ENSG00000168653	G	A	-9059	0.53125	64	90	2.36816e-42	-1.49714	0.0588206	3.39373e-50	1.33059e-38	5.13929e-05
1	39017259	1:39017259:G:A	ENSG00000168653	NDUFS5	chr1:39026402:39028723:clu_27195_?:ENSG00000168653	G	A	-9059	0.53125	64	90	5.86871e-44	1.52628	0.0571897	3.39373e-50	1.33059e-38	5.13929e-05
1	39017457	1:39017457:A:G	ENSG00000168653	NDUFS5	chr1:39026398:39028723:clu_27195_?:ENSG00000168653	A	G	-8861	0.53125	64	90	2.36816e-42	-1.49714	0.0588206	3.39373e-50	1.33059e-38	5.13929e-05
1	39017457	1:39017457:A:G	ENSG00000168653	NDUFS5	chr1:39026402:39028723:clu_27195_?:ENSG00000168653	A	G	-8861	0.53125	64	90	5.86871e-44	1.52628	0.0571897	3.39373e-50	1.33059e-38	5.13929e-05
1	39017480	1:39017480:A:T	ENSG00000168653	NDUFS5	chr1:39026402:39028723:clu_27195_?:ENSG00000168653	A	T	-8838	0.588542	60	79	4.00265e-22	1.35439	0.104453	3.39373e-50	1.33059e-38	5.13929e-05
1	39017480	1:39017480:A:T	ENSG00000168653	NDUFS5	chr1:39026398:39028723:clu_27195_?:ENSG00000168653	A	T	-8838	0.588542	60	79	2.41398e-21	-1.32122	0.10513	3.39373e-50	1.33059e-38	5.13929e-05
1	39017765	1:39017765:A:T	ENSG00000168653	NDUFS5	chr1:39026402:39028723:clu_27195_?:ENSG00000168653	A	T	-8553	0.53125	64	90	5.86871e-44	1.52628	0.0571897	3.39373e-50	1.33059e-38	5.13929e-05
1	39017765	1:39017765:A:T	ENSG00000168653	NDUFS5	chr1:39026398:39028723:clu_27195_?:ENSG00000168653	A	T	-8553	0.53125	64	90	2.36816e-42	-1.49714	0.0588206	3.39373e-50	1.33059e-38	5.13929e-05
1	39018294	1:39018294:G:A	ENSG00000168653	NDUFS5	chr1:39026398:39028723:clu_27195_?:ENSG00000168653	G	A	-8024	0.53125	64	90	2.36816e-42	-1.49714	0.0588206	3.39373e-50	1.33059e-38	5.13929e-05
1	39018294	1:39018294:G:A	ENSG00000168653	NDUFS5	chr1:39026402:39028723:clu_27195_?:ENSG00000168653	G	A	-8024	0.53125	64	90	5.86871e-44	1.52628	0.0571897	3.39373e-50	1.33059e-38	5.13929e-05
1	39018337	1:39018337:C:T	ENSG00000168653	NDUFS5	chr1:39026402:39028723:clu_27195_?:ENSG00000168653	C	T	-7981	0.53125	64	90	5.86871e-44	1.52628	0.0571897	3.39373e-50	1.33059e-38	5.13929e-05
1	39018337	1:39018337:C:T	ENSG00000168653	NDUFS5	chr1:39026398:39028723:clu_27195_?:ENSG00000168653	C	T	-7981	0.53125	64	90	2.36816e-42	-1.49714	0.0588206	3.39373e-50	1.33059e-38	5.13929e-05
1	39018702	1:39018702:A:G	ENSG00000168653	NDUFS5	chr1:39026402:39028723:clu_27195_?:ENSG00000168653	A	G	-7616	0.53125	64	90	5.86871e-44	1.52628	0.0571897	3.39373e-50	1.33059e-38	5.13929e-05
1	39018702	1:39018702:A:G	ENSG00000168653	NDUFS5	chr1:39026398:39028723:clu_27195_?:ENSG00000168653	A	G	-7616	0.53125	64	90	2.36816e-42	-1.49714	0.0588206	3.39373e-50	1.33059e-38	5.13929e-05
1	39019058	1:39019058:T:G	ENSG00000168653	NDUFS5	chr1:39026398:39028723:clu_27195_?:ENSG00000168653	G	T	-7260	0.25	42	48	7.55209e-06	-0.795838	0.167198	3.39373e-50	1.33059e-38	5.13929e-05
1	39019058	1:39019058:T:G	ENSG00000168653	NDUFS5	chr1:39026402:39028723:clu_27195_?:ENSG00000168653	G	T	-7260	0.25	42	48	3.13959e-06	0.836215	0.167908	3.39373e-50	1.33059e-38	5.13929e-05
1	39019062	1:39019062:T:G	ENSG00000168653	NDUFS5	chr1:39026398:39028723:clu_27195_?:ENSG00000168653	G	T	-7256	0.25	42	48	7.55209e-06	-0.795838	0.167198	3.39373e-50	1.33059e-38	5.13929e-05
1	39019062	1:39019062:T:G	ENSG00000168653	NDUFS5	chr1:39026402:39028723:clu_27195_?:ENSG00000168653	G	T	-7256	0.25	42	48	3.13959e-06	0.836215	0.167908	3.39373e-50	1.33059e-38	5.13929e-05
1	39019066	1:39019066:T:G	ENSG00000168653	NDUFS5	chr1:39026402:39028723:clu_27195_?:ENSG00000168653	G	T	-7252	0.25	42	48	3.13959e-06	0.836215	0.167908	3.39373e-50	1.33059e-38	5.13929e-05
1	39019066	1:39019066:T:G	ENSG00000168653	NDUFS5	chr1:39026398:39028723:clu_27195_?:ENSG00000168653	G	T	-7252	0.25	42	48	7.55209e-06	-0.795838	0.167198	3.39373e-50	1.33059e-38	5.13929e-05
1	39019070	1:39019070:T:G	ENSG00000168653	NDUFS5	chr1:39026398:39028723:clu_27195_?:ENSG00000168653	G	T	-7248	0.25	42	48	7.55209e-06	-0.795838	0.167198	3.39373e-50	1.33059e-38	5.13929e-05
1	39019070	1:39019070:T:G	ENSG00000168653	NDUFS5	chr1:39026402:39028723:clu_27195_?:ENSG00000168653	G	T	-7248	0.25	42	48	3.13959e-06	0.836215	0.167908	3.39373e-50	1.33059e-38	5.13929e-05
1	39019074	1:39019074:T:G	ENSG00000168653	NDUFS5	chr1:39026398:39028723:clu_27195_?:ENSG00000168653	G	T	-7244	0.25	42	48	7.55209e-06	-0.795838	0.167198	3.39373e-50	1.33059e-38	5.13929e-05
1	39019074	1:39019074:T:G	ENSG00000168653	NDUFS5	chr1:39026402:39028723:clu_27195_?:ENSG00000168653	G	T	-7244	0.25	42	48	3.13959e-06	0.836215	0.167908	3.39373e-50	1.33059e-38	5.13929e-05
1	39019078	1:39019078:T:G	ENSG00000168653	NDUFS5	chr1:39026402:39028723:clu_27195_?:ENSG00000168653	G	T	-7240	0.244792	41	47	4.98964e-06	0.817524	0.168058	3.39373e-50	1.33059e-38	5.13929e-05
1	39019078	1:39019078:T:G	ENSG00000168653	NDUFS5	chr1:39026398:39028723:clu_27195_?:ENSG00000168653	G	T	-7240	0.244792	41	47	1.18746e-05	-0.777087	0.167325	3.39373e-50	1.33059e-38	5.13929e-05
1	39020427	1:39020427:G:A	ENSG00000168653	NDUFS5	chr1:39026398:39028723:clu_27195_?:ENSG00000168653	A	G	-5891	0.317708	51	61	4.06895e-12	1.1897	0.1482	3.39373e-50	1.33059e-38	5.13929e-05
1	39020427	1:39020427:G:A	ENSG00000168653	NDUFS5	chr1:39026402:39028723:clu_27195_?:ENSG00000168653	A	G	-5891	0.317708	51	61	2.0822e-12	-1.21849	0.149142	3.39373e-50	1.33059e-38	5.13929e-05
1	39021472	1:39021472:G:T	ENSG00000168653	NDUFS5	chr1:39026402:39028723:clu_27195_?:ENSG00000168653	T	G	-4846	0.25	42	48	3.13959e-06	0.836215	0.167908	3.39373e-50	1.33059e-38	5.13929e-05
1	39021472	1:39021472:G:T	ENSG00000168653	NDUFS5	chr1:39026398:39028723:clu_27195_?:ENSG00000168653	T	G	-4846	0.25	42	48	7.55209e-06	-0.795838	0.167198	3.39373e-50	1.33059e-38	5.13929e-05
1	39021492	1:39021492:A:G	ENSG00000168653	NDUFS5	chr1:39026398:39028723:clu_27195_?:ENSG00000168653	G	A	-4826	0.385417	59	74	5.77176e-15	-1.12294	0.119288	3.39373e-50	1.33059e-38	5.13929e-05
1	39021492	1:39021492:A:G	ENSG00000168653	NDUFS5	chr1:39026402:39028723:clu_27195_?:ENSG00000168653	G	A	-4826	0.385417	59	74	1.28743e-15	1.15719	0.118927	3.39373e-50	1.33059e-38	5.13929e-05
1	39021550	1:39021550:T:C	ENSG00000168653	NDUFS5	chr1:39026402:39028723:clu_27195_?:ENSG00000168653	C	T	-4768	0.385417	59	74	1.28743e-15	1.15719	0.118927	3.39373e-50	1.33059e-38	5.13929e-05
1	39021550	1:39021550:T:C	ENSG00000168653	NDUFS5	chr1:39026398:39028723:clu_27195_?:ENSG00000168653	C	T	-4768	0.385417	59	74	5.77176e-15	-1.12294	0.119288	3.39373e-50	1.33059e-38	5.13929e-05
1	39021610	1:39021610:T:C	ENSG00000168653	NDUFS5	chr1:39026402:39028723:clu_27195_?:ENSG00000168653	C	T	-4708	0.317708	51	61	2.0822e-12	-1.21849	0.149142	3.39373e-50	1.33059e-38	5.13929e-05
1	39021610	1:39021610:T:C	ENSG00000168653	NDUFS5	chr1:39026398:39028723:clu_27195_?:ENSG00000168653	C	T	-4708	0.317708	51	61	4.06895e-12	1.1897	0.1482	3.39373e-50	1.33059e-38	5.13929e-05
1	39022127	1:39022127:T:C	ENSG00000168653	NDUFS5	chr1:39026402:39028723:clu_27195_?:ENSG00000168653	C	T	-4191	0.385417	59	74	1.28743e-15	1.15719	0.118927	3.39373e-50	1.33059e-38	5.13929e-05
1	39022127	1:39022127:T:C	ENSG00000168653	NDUFS5	chr1:39026398:39028723:clu_27195_?:ENSG00000168653	C	T	-4191	0.385417	59	74	5.77176e-15	-1.12294	0.119288	3.39373e-50	1.33059e-38	5.13929e-05
1	39022211	1:39022211:A:T	ENSG00000168653	NDUFS5	chr1:39026402:39028723:clu_27195_?:ENSG00000168653	T	A	-4107	0.385417	59	74	1.28743e-15	1.15719	0.118927	3.39373e-50	1.33059e-38	5.13929e-05
1	39022211	1:39022211:A:T	ENSG00000168653	NDUFS5	chr1:39026398:39028723:clu_27195_?:ENSG00000168653	T	A	-4107	0.385417	59	74	5.77176e-15	-1.12294	0.119288	3.39373e-50	1.33059e-38	5.13929e-05
1	39022339	1:39022339:A:G	ENSG00000168653	NDUFS5	chr1:39026398:39028723:clu_27195_?:ENSG00000168653	G	A	-3979	0.380208	58	73	1.99941e-14	-1.10377	0.120609	3.39373e-50	1.33059e-38	5.13929e-05
1	39022339	1:39022339:A:G	ENSG00000168653	NDUFS5	chr1:39026402:39028723:clu_27195_?:ENSG00000168653	G	A	-3979	0.380208	58	73	4.95109e-15	1.13717	0.120386	3.39373e-50	1.33059e-38	5.13929e-05
1	39022663	1:39022663:C:G	ENSG00000168653	NDUFS5	chr1:39026398:39028723:clu_27195_?:ENSG00000168653	G	C	-3655	0.0677083	11	13	2.03165e-05	-1.2558	0.278765	3.39373e-50	1.33059e-38	5.13929e-05
1	39022663	1:39022663:C:G	ENSG00000168653	NDUFS5	chr1:39026402:39028723:clu_27195_?:ENSG00000168653	G	C	-3655	0.0677083	11	13	2.79822e-05	1.25387	0.283635	3.39373e-50	1.33059e-38	5.13929e-05
1	39023076	1:39023076:A:G	ENSG00000168653	NDUFS5	chr1:39026398:39028723:clu_27195_?:ENSG00000168653	G	A	-3242	0.25	42	48	7.55209e-06	-0.795838	0.167198	3.39373e-50	1.33059e-38	5.13929e-05
1	39023076	1:39023076:A:G	ENSG00000168653	NDUFS5	chr1:39026402:39028723:clu_27195_?:ENSG00000168653	G	A	-3242	0.25	42	48	3.13959e-06	0.836215	0.167908	3.39373e-50	1.33059e-38	5.13929e-05
1	39023179	1:39023179:C:G	ENSG00000168653	NDUFS5	chr1:39026398:39028723:clu_27195_?:ENSG00000168653	G	C	-3139	0.25	42	48	7.55209e-06	-0.795838	0.167198	3.39373e-50	1.33059e-38	5.13929e-05
1	39023179	1:39023179:C:G	ENSG00000168653	NDUFS5	chr1:39026402:39028723:clu_27195_?:ENSG00000168653	G	C	-3139	0.25	42	48	3.13959e-06	0.836215	0.167908	3.39373e-50	1.33059e-38	5.13929e-05
1	39023549	1:39023549:G:A	ENSG00000168653	NDUFS5	chr1:39026398:39028723:clu_27195_?:ENSG00000168653	A	G	-2769	0.244792	38	47	3.00448e-11	1.35778	0.178635	3.39373e-50	1.33059e-38	5.13929e-05
1	39023549	1:39023549:G:A	ENSG00000168653	NDUFS5	chr1:39026402:39028723:clu_27195_?:ENSG00000168653	A	G	-2769	0.244792	38	47	2.39652e-11	-1.38198	0.180667	3.39373e-50	1.33059e-38	5.13929e-05
1	39023915	1:39023915:A:G	ENSG00000168653	NDUFS5	chr1:39026398:39028723:clu_27195_?:ENSG00000168653	G	A	-2403	0.078125	13	15	1.87615e-06	-1.36045	0.266376	3.39373e-50	1.33059e-38	5.13929e-05
1	39023915	1:39023915:A:G	ENSG00000168653	NDUFS5	chr1:39026402:39028723:clu_27195_?:ENSG00000168653	G	A	-2403	0.078125	13	15	1.9413e-06	1.37766	0.27019	3.39373e-50	1.33059e-38	5.13929e-05
1	39024352	1:39024352:A:G	ENSG00000168653	NDUFS5	chr1:39026398:39028723:clu_27195_?:ENSG00000168653	A	G	-1966	0.609375	57	75	4.07614e-19	-1.24759	0.108982	3.39373e-50	1.33059e-38	5.13929e-05
1	39024352	1:39024352:A:G	ENSG00000168653	NDUFS5	chr1:39026402:39028723:clu_27195_?:ENSG00000168653	A	G	-1966	0.609375	57	75	8.43765e-20	1.27972	0.108554	3.39373e-50	1.33059e-38	5.13929e-05
1	39024826	1:39024826:G:C	ENSG00000168653	NDUFS5	chr1:39026402:39028723:clu_27195_?:ENSG00000168653	C	G	-1492	0.166667	30	32	3.93851e-05	0.93818	0.216677	3.39373e-50	1.33059e-38	5.13929e-05
1	39024826	1:39024826:G:C	ENSG00000168653	NDUFS5	chr1:39026398:39028723:clu_27195_?:ENSG00000168653	C	G	-1492	0.166667	30	32	2.69703e-05	-0.942896	0.212822	3.39373e-50	1.33059e-38	5.13929e-05
1	39025382	1:39025382:A:G	ENSG00000168653	NDUFS5	chr1:39026398:39028723:clu_27195_?:ENSG00000168653	A	G	-936	0.536458	63	89	3.89856e-48	-1.49903	0.04976	3.39373e-50	1.33059e-38	5.13929e-05
1	39025382	1:39025382:A:G	ENSG00000168653	NDUFS5	chr1:39026402:39028723:clu_27195_?:ENSG00000168653	A	G	-936	0.536458	63	89	3.39368e-50	1.52743	0.0478083	3.39373e-50	1.33059e-38	5.13929e-05
1	39025755	1:39025755:C:T	ENSG00000168653	NDUFS5	chr1:39026398:39028723:clu_27195_?:ENSG00000168653	T	C	-563	0.078125	13	15	1.87615e-06	-1.36045	0.266376	3.39373e-50	1.33059e-38	5.13929e-05
1	39025755	1:39025755:C:T	ENSG00000168653	NDUFS5	chr1:39026402:39028723:clu_27195_?:ENSG00000168653	T	C	-563	0.078125	13	15	1.9413e-06	1.37766	0.27019	3.39373e-50	1.33059e-38	5.13929e-05
1	39025923	1:39025923:T:C	ENSG00000168653	NDUFS5	chr1:39026402:39028723:clu_27195_?:ENSG00000168653	T	C	-395	0.536458	63	89	3.39368e-50	1.52743	0.0478083	3.39373e-50	1.33059e-38	5.13929e-05
1	39025923	1:39025923:T:C	ENSG00000168653	NDUFS5	chr1:39026398:39028723:clu_27195_?:ENSG00000168653	T	C	-395	0.536458	63	89	3.89856e-48	-1.49903	0.04976	3.39373e-50	1.33059e-38	5.13929e-05
1	39026255	1:39026255:G:C	ENSG00000168653	NDUFS5	chr1:39026402:39028723:clu_27195_?:ENSG00000168653	G	C	-63	0.536458	63	89	3.39368e-50	1.52743	0.0478083	3.39373e-50	1.33059e-38	5.13929e-05
1	39026255	1:39026255:G:C	ENSG00000168653	NDUFS5	chr1:39026398:39028723:clu_27195_?:ENSG00000168653	G	C	-63	0.536458	63	89	3.89856e-48	-1.49903	0.04976	3.39373e-50	1.33059e-38	5.13929e-05
1	39026408	1:39026408:G:T	ENSG00000168653	NDUFS5	chr1:39026398:39028723:clu_27195_?:ENSG00000168653	G	T	90	0.536458	63	89	3.89856e-48	-1.49903	0.04976	3.39373e-50	1.33059e-38	5.13929e-05
1	39026408	1:39026408:G:T	ENSG00000168653	NDUFS5	chr1:39026402:39028723:clu_27195_?:ENSG00000168653	G	T	90	0.536458	63	89	3.39368e-50	1.52743	0.0478083	3.39373e-50	1.33059e-38	5.13929e-05
1	39026790	1:39026790:C:T	ENSG00000168653	NDUFS5	chr1:39026402:39028723:clu_27195_?:ENSG00000168653	T	C	472	0.234375	41	45	7.8735e-06	0.863895	0.181901	3.39373e-50	1.33059e-38	5.13929e-05
1	39026790	1:39026790:C:T	ENSG00000168653	NDUFS5	chr1:39026398:39028723:clu_27195_?:ENSG00000168653	T	C	472	0.234375	41	45	1.42188e-05	-0.830165	0.180561	3.39373e-50	1.33059e-38	5.13929e-05
1	39027092	1:39027092:G:A	ENSG00000168653	NDUFS5	chr1:39026398:39028723:clu_27195_?:ENSG00000168653	G	A	774	0.536458	63	89	3.89856e-48	-1.49903	0.04976	3.39373e-50	1.33059e-38	5.13929e-05
1	39027092	1:39027092:G:A	ENSG00000168653	NDUFS5	chr1:39026402:39028723:clu_27195_?:ENSG00000168653	G	A	774	0.536458	63	89	3.39368e-50	1.52743	0.0478083	3.39373e-50	1.33059e-38	5.13929e-05
1	39027093	1:39027093:A:T	ENSG00000168653	NDUFS5	chr1:39026398:39028723:clu_27195_?:ENSG00000168653	A	T	775	0.536458	63	89	3.89856e-48	-1.49903	0.04976	3.39373e-50	1.33059e-38	5.13929e-05
1	39027093	1:39027093:A:T	ENSG00000168653	NDUFS5	chr1:39026402:39028723:clu_27195_?:ENSG00000168653	A	T	775	0.536458	63	89	3.39368e-50	1.52743	0.0478083	3.39373e-50	1.33059e-38	5.13929e-05
1	39027449	1:39027449:T:C	ENSG00000168653	NDUFS5	chr1:39026402:39028723:clu_27195_?:ENSG00000168653	T	C	1131	0.536458	63	89	3.39368e-50	1.52743	0.0478083	3.39373e-50	1.33059e-38	5.13929e-05
1	39027449	1:39027449:T:C	ENSG00000168653	NDUFS5	chr1:39026398:39028723:clu_27195_?:ENSG00000168653	T	C	1131	0.536458	63	89	3.89856e-48	-1.49903	0.04976	3.39373e-50	1.33059e-38	5.13929e-05
1	39027858	1:39027858:G:A	ENSG00000168653	NDUFS5	chr1:39026402:39028723:clu_27195_?:ENSG00000168653	G	A	1540	0.536458	63	89	3.39368e-50	1.52743	0.0478083	3.39373e-50	1.33059e-38	5.13929e-05
1	39027858	1:39027858:G:A	ENSG00000168653	NDUFS5	chr1:39026398:39028723:clu_27195_?:ENSG00000168653	G	A	1540	0.536458	63	89	3.89856e-48	-1.49903	0.04976	3.39373e-50	1.33059e-38	5.13929e-05
1	39027946	1:39027946:T:C	ENSG00000168653	NDUFS5	chr1:39026398:39028723:clu_27195_?:ENSG00000168653	C	T	1628	0.3125	50	60	1.57892e-11	-1.00891	0.130373	3.39373e-50	1.33059e-38	5.13929e-05
1	39027946	1:39027946:T:C	ENSG00000168653	NDUFS5	chr1:39026402:39028723:clu_27195_?:ENSG00000168653	C	T	1628	0.3125	50	60	6.32794e-12	1.03808	0.130844	3.39373e-50	1.33059e-38	5.13929e-05
1	39028109	1:39028109:C:T	ENSG00000168653	NDUFS5	chr1:39026402:39028723:clu_27195_?:ENSG00000168653	T	C	1791	0.239583	42	46	2.12664e-05	0.821698	0.182888	3.39373e-50	1.33059e-38	5.13929e-05
1	39028109	1:39028109:C:T	ENSG00000168653	NDUFS5	chr1:39026398:39028723:clu_27195_?:ENSG00000168653	T	C	1791	0.239583	42	46	3.55159e-05	-0.790362	0.181382	3.39373e-50	1.33059e-38	5.13929e-05
1	39028357	1:39028357:T:C	ENSG00000168653	NDUFS5	chr1:39026402:39028723:clu_27195_?:ENSG00000168653	T	C	2039	0.536458	63	89	3.39368e-50	1.52743	0.0478083	3.39373e-50	1.33059e-38	5.13929e-05
1	39028357	1:39028357:T:C	ENSG00000168653	NDUFS5	chr1:39026398:39028723:clu_27195_?:ENSG00000168653	T	C	2039	0.536458	63	89	3.89856e-48	-1.49903	0.04976	3.39373e-50	1.33059e-38	5.13929e-05
1	39029015	1:39029015:G:A	ENSG00000168653	NDUFS5	chr1:39026398:39028723:clu_27195_?:ENSG00000168653	G	A	2697	0.536458	63	89	3.89856e-48	-1.49903	0.04976	3.39373e-50	1.33059e-38	5.13929e-05
1	39029015	1:39029015:G:A	ENSG00000168653	NDUFS5	chr1:39026402:39028723:clu_27195_?:ENSG00000168653	G	A	2697	0.536458	63	89	3.39368e-50	1.52743	0.0478083	3.39373e-50	1.33059e-38	5.13929e-05
1	39029088	1:39029088:G:A	ENSG00000168653	NDUFS5	chr1:39026398:39028723:clu_27195_?:ENSG00000168653	G	A	2770	0.536458	63	89	3.89856e-48	-1.49903	0.04976	3.39373e-50	1.33059e-38	5.13929e-05
1	39029088	1:39029088:G:A	ENSG00000168653	NDUFS5	chr1:39026402:39028723:clu_27195_?:ENSG00000168653	G	A	2770	0.536458	63	89	3.39368e-50	1.52743	0.0478083	3.39373e-50	1.33059e-38	5.13929e-05
1	39030045	1:39030045:C:T	ENSG00000168653	NDUFS5	chr1:39026402:39028723:clu_27195_?:ENSG00000168653	C	T	3727	0.536458	63	89	3.39368e-50	1.52743	0.0478083	3.39373e-50	1.33059e-38	5.13929e-05
1	39030045	1:39030045:C:T	ENSG00000168653	NDUFS5	chr1:39026398:39028723:clu_27195_?:ENSG00000168653	C	T	3727	0.536458	63	89	3.89856e-48	-1.49903	0.04976	3.39373e-50	1.33059e-38	5.13929e-05
1	39030091	1:39030091:T:A	ENSG00000168653	NDUFS5	chr1:39026398:39028723:clu_27195_?:ENSG00000168653	T	A	3773	0.536458	63	89	3.89856e-48	-1.49903	0.04976	3.39373e-50	1.33059e-38	5.13929e-05
1	39030091	1:39030091:T:A	ENSG00000168653	NDUFS5	chr1:39026402:39028723:clu_27195_?:ENSG00000168653	T	A	3773	0.536458	63	89	3.39368e-50	1.52743	0.0478083	3.39373e-50	1.33059e-38	5.13929e-05
1	39030400	1:39030400:G:A	ENSG00000168653	NDUFS5	chr1:39026402:39028723:clu_27195_?:ENSG00000168653	G	A	4082	0.526042	65	91	6.26613e-41	1.50354	0.0616326	3.39373e-50	1.33059e-38	5.13929e-05
1	39030400	1:39030400:G:A	ENSG00000168653	NDUFS5	chr1:39026398:39028723:clu_27195_?:ENSG00000168653	G	A	4082	0.526042	65	91	1.70053e-39	-1.47432	0.0631048	3.39373e-50	1.33059e-38	5.13929e-05
1	39030869	1:39030869:A:G	ENSG00000168653	NDUFS5	chr1:39026402:39028723:clu_27195_?:ENSG00000168653	A	G	4551	0.541667	63	88	8.44595e-45	1.52094	0.0556022	3.39373e-50	1.33059e-38	5.13929e-05
1	39030869	1:39030869:A:G	ENSG00000168653	NDUFS5	chr1:39026398:39028723:clu_27195_?:ENSG00000168653	A	G	4551	0.541667	63	88	3.53565e-43	-1.49222	0.0572118	3.39373e-50	1.33059e-38	5.13929e-05
1	39031052	1:39031052:C:T	ENSG00000168653	NDUFS5	chr1:39026402:39028723:clu_27195_?:ENSG00000168653	C	T	4734	0.536458	63	89	3.39368e-50	1.52743	0.0478083	3.39373e-50	1.33059e-38	5.13929e-05
1	39031052	1:39031052:C:T	ENSG00000168653	NDUFS5	chr1:39026398:39028723:clu_27195_?:ENSG00000168653	C	T	4734	0.536458	63	89	3.89856e-48	-1.49903	0.04976	3.39373e-50	1.33059e-38	5.13929e-05
1	39031113	1:39031113:G:C	ENSG00000168653	NDUFS5	chr1:39026402:39028723:clu_27195_?:ENSG00000168653	G	C	4795	0.536458	63	89	3.39368e-50	1.52743	0.0478083	3.39373e-50	1.33059e-38	5.13929e-05
1	39031113	1:39031113:G:C	ENSG00000168653	NDUFS5	chr1:39026398:39028723:clu_27195_?:ENSG00000168653	G	C	4795	0.536458	63	89	3.89856e-48	-1.49903	0.04976	3.39373e-50	1.33059e-38	5.13929e-05
1	39031147	1:39031147:G:A	ENSG00000168653	NDUFS5	chr1:39026402:39028723:clu_27195_?:ENSG00000168653	A	G	4829	0.234375	41	45	7.8735e-06	0.863895	0.181901	3.39373e-50	1.33059e-38	5.13929e-05
1	39031147	1:39031147:G:A	ENSG00000168653	NDUFS5	chr1:39026398:39028723:clu_27195_?:ENSG00000168653	A	G	4829	0.234375	41	45	1.42188e-05	-0.830165	0.180561	3.39373e-50	1.33059e-38	5.13929e-05
1	39031156	1:39031156:C:T	ENSG00000168653	NDUFS5	chr1:39026402:39028723:clu_27195_?:ENSG00000168653	T	C	4838	0.317708	51	61	2.0822e-12	-1.21849	0.149142	3.39373e-50	1.33059e-38	5.13929e-05
1	39031156	1:39031156:C:T	ENSG00000168653	NDUFS5	chr1:39026398:39028723:clu_27195_?:ENSG00000168653	T	C	4838	0.317708	51	61	4.06895e-12	1.1897	0.1482	3.39373e-50	1.33059e-38	5.13929e-05
1	39031534	1:39031534:G:A	ENSG00000168653	NDUFS5	chr1:39026398:39028723:clu_27195_?:ENSG00000168653	G	A	5216	0.536458	63	89	3.89856e-48	-1.49903	0.04976	3.39373e-50	1.33059e-38	5.13929e-05
1	39031534	1:39031534:G:A	ENSG00000168653	NDUFS5	chr1:39026402:39028723:clu_27195_?:ENSG00000168653	G	A	5216	0.536458	63	89	3.39368e-50	1.52743	0.0478083	3.39373e-50	1.33059e-38	5.13929e-05
1	39032670	1:39032670:A:G	ENSG00000168653	NDUFS5	chr1:39026402:39028723:clu_27195_?:ENSG00000168653	G	A	6352	0.0572917	10	11	3.47232e-05	1.41124	0.323421	3.39373e-50	1.33059e-38	5.13929e-05
1	39032670	1:39032670:A:G	ENSG00000168653	NDUFS5	chr1:39026398:39028723:clu_27195_?:ENSG00000168653	G	A	6352	0.0572917	10	11	3.51224e-05	-1.39104	0.319015	3.39373e-50	1.33059e-38	5.13929e-05
1	39032819	1:39032819:G:A	ENSG00000168653	NDUFS5	chr1:39026398:39028723:clu_27195_?:ENSG00000168653	G	A	6501	0.609375	57	75	4.07614e-19	-1.24759	0.108982	3.39373e-50	1.33059e-38	5.13929e-05
1	39032819	1:39032819:G:A	ENSG00000168653	NDUFS5	chr1:39026402:39028723:clu_27195_?:ENSG00000168653	G	A	6501	0.609375	57	75	8.43765e-20	1.27972	0.108554	3.39373e-50	1.33059e-38	5.13929e-05
1	39033441	1:39033441:C:T	ENSG00000168653	NDUFS5	chr1:39026398:39028723:clu_27195_?:ENSG00000168653	C	T	7123	0.53125	64	90	1.36346e-44	-1.48579	0.0546482	3.39373e-50	1.33059e-38	5.13929e-05
1	39033441	1:39033441:C:T	ENSG00000168653	NDUFS5	chr1:39026402:39028723:clu_27195_?:ENSG00000168653	C	T	7123	0.53125	64	90	4.67422e-46	1.51309	0.0533287	3.39373e-50	1.33059e-38	5.13929e-05
1	39033527	1:39033527:C:T	ENSG00000168653	NDUFS5	chr1:39026402:39028723:clu_27195_?:ENSG00000168653	T	C	7209	0.494792	66	95	6.93105e-25	1.32264	0.0917673	3.39373e-50	1.33059e-38	5.13929e-05
1	39033527	1:39033527:C:T	ENSG00000168653	NDUFS5	chr1:39026398:39028723:clu_27195_?:ENSG00000168653	T	C	7209	0.494792	66	95	3.52449e-24	-1.29406	0.092186	3.39373e-50	1.33059e-38	5.13929e-05
1	39035577	1:39035577:C:G	ENSG00000168653	NDUFS5	chr1:39026402:39028723:clu_27195_?:ENSG00000168653	G	C	9259	0.234375	41	45	7.8735e-06	0.863895	0.181901	3.39373e-50	1.33059e-38	5.13929e-05
1	39035577	1:39035577:C:G	ENSG00000168653	NDUFS5	chr1:39026398:39028723:clu_27195_?:ENSG00000168653	G	C	9259	0.234375	41	45	1.42188e-05	-0.830165	0.180561	3.39373e-50	1.33059e-38	5.13929e-05
1	39035915	1:39035915:C:T	ENSG00000168653	NDUFS5	chr1:39026402:39028723:clu_27195_?:ENSG00000168653	T	C	9597	0.0572917	10	11	3.47232e-05	1.41124	0.323421	3.39373e-50	1.33059e-38	5.13929e-05
1	39035915	1:39035915:C:T	ENSG00000168653	NDUFS5	chr1:39026398:39028723:clu_27195_?:ENSG00000168653	T	C	9597	0.0572917	10	11	3.51224e-05	-1.39104	0.319015	3.39373e-50	1.33059e-38	5.13929e-05
1	39037062	1:39037062:C:T	ENSG00000168653	NDUFS5	chr1:39026398:39028723:clu_27195_?:ENSG00000168653	C	T	10744	0.536458	63	89	3.89856e-48	-1.49903	0.04976	3.39373e-50	1.33059e-38	5.13929e-05
1	39037062	1:39037062:C:T	ENSG00000168653	NDUFS5	chr1:39026402:39028723:clu_27195_?:ENSG00000168653	C	T	10744	0.536458	63	89	3.39368e-50	1.52743	0.0478083	3.39373e-50	1.33059e-38	5.13929e-05
1	39037147	1:39037147:T:G	ENSG00000168653	NDUFS5	chr1:39026402:39028723:clu_27195_?:ENSG00000168653	T	G	10829	0.536458	63	89	3.39368e-50	1.52743	0.0478083	3.39373e-50	1.33059e-38	5.13929e-05
1	39037147	1:39037147:T:G	ENSG00000168653	NDUFS5	chr1:39026398:39028723:clu_27195_?:ENSG00000168653	T	G	10829	0.536458	63	89	3.89856e-48	-1.49903	0.04976	3.39373e-50	1.33059e-38	5.13929e-05
1	39037472	1:39037472:C:T	ENSG00000168653	NDUFS5	chr1:39026398:39028723:clu_27195_?:ENSG00000168653	T	C	11154	0.333333	53	64	5.14512e-14	1.21989	0.136265	3.39373e-50	1.33059e-38	5.13929e-05
1	39037472	1:39037472:C:T	ENSG00000168653	NDUFS5	chr1:39026402:39028723:clu_27195_?:ENSG00000168653	T	C	11154	0.333333	53	64	2.23036e-14	-1.24946	0.136873	3.39373e-50	1.33059e-38	5.13929e-05
1	39037489	1:39037489:C:T	ENSG00000168653	NDUFS5	chr1:39026398:39028723:clu_27195_?:ENSG00000168653	C	T	11171	0.536458	63	89	3.89856e-48	-1.49903	0.04976	3.39373e-50	1.33059e-38	5.13929e-05
1	39037489	1:39037489:C:T	ENSG00000168653	NDUFS5	chr1:39026402:39028723:clu_27195_?:ENSG00000168653	C	T	11171	0.536458	63	89	3.39368e-50	1.52743	0.0478083	3.39373e-50	1.33059e-38	5.13929e-05
1	39037914	1:39037914:C:G	ENSG00000168653	NDUFS5	chr1:39026402:39028723:clu_27195_?:ENSG00000168653	C	G	11596	0.536458	63	89	3.39368e-50	1.52743	0.0478083	3.39373e-50	1.33059e-38	5.13929e-05
1	39037914	1:39037914:C:G	ENSG00000168653	NDUFS5	chr1:39026398:39028723:clu_27195_?:ENSG00000168653	C	G	11596	0.536458	63	89	3.89856e-48	-1.49903	0.04976	3.39373e-50	1.33059e-38	5.13929e-05
1	39038095	1:39038095:A:G	ENSG00000168653	NDUFS5	chr1:39026398:39028723:clu_27195_?:ENSG00000168653	A	G	11777	0.536458	63	89	3.89856e-48	-1.49903	0.04976	3.39373e-50	1.33059e-38	5.13929e-05
1	39038095	1:39038095:A:G	ENSG00000168653	NDUFS5	chr1:39026402:39028723:clu_27195_?:ENSG00000168653	A	G	11777	0.536458	63	89	3.39368e-50	1.52743	0.0478083	3.39373e-50	1.33059e-38	5.13929e-05
1	39038171	1:39038171:T:C	ENSG00000168653	NDUFS5	chr1:39026402:39028723:clu_27195_?:ENSG00000168653	T	C	11853	0.604167	58	76	2.85747e-20	1.30161	0.108245	3.39373e-50	1.33059e-38	5.13929e-05
1	39038171	1:39038171:T:C	ENSG00000168653	NDUFS5	chr1:39026398:39028723:clu_27195_?:ENSG00000168653	T	C	11853	0.604167	58	76	1.56927e-19	-1.26831	0.10883	3.39373e-50	1.33059e-38	5.13929e-05
1	39038206	1:39038206:T:C	ENSG00000168653	NDUFS5	chr1:39026402:39028723:clu_27195_?:ENSG00000168653	T	C	11888	0.536458	63	89	3.39368e-50	1.52743	0.0478083	3.39373e-50	1.33059e-38	5.13929e-05
1	39038206	1:39038206:T:C	ENSG00000168653	NDUFS5	chr1:39026398:39028723:clu_27195_?:ENSG00000168653	T	C	11888	0.536458	63	89	3.89856e-48	-1.49903	0.04976	3.39373e-50	1.33059e-38	5.13929e-05
1	39039946	1:39039946:A:G	ENSG00000168653	NDUFS5	chr1:39026398:39028723:clu_27195_?:ENSG00000168653	A	G	13628	0.536458	63	89	3.89856e-48	-1.49903	0.04976	3.39373e-50	1.33059e-38	5.13929e-05
1	39039946	1:39039946:A:G	ENSG00000168653	NDUFS5	chr1:39026402:39028723:clu_27195_?:ENSG00000168653	A	G	13628	0.536458	63	89	3.39368e-50	1.52743	0.0478083	3.39373e-50	1.33059e-38	5.13929e-05
1	39040012	1:39040012:C:T	ENSG00000168653	NDUFS5	chr1:39026398:39028723:clu_27195_?:ENSG00000168653	C	T	13694	0.609375	57	75	4.07614e-19	-1.24759	0.108982	3.39373e-50	1.33059e-38	5.13929e-05
1	39040012	1:39040012:C:T	ENSG00000168653	NDUFS5	chr1:39026402:39028723:clu_27195_?:ENSG00000168653	C	T	13694	0.609375	57	75	8.43765e-20	1.27972	0.108554	3.39373e-50	1.33059e-38	5.13929e-05
1	39040121	1:39040121:G:A	ENSG00000168653	NDUFS5	chr1:39026398:39028723:clu_27195_?:ENSG00000168653	G	A	13803	0.536458	63	89	3.89856e-48	-1.49903	0.04976	3.39373e-50	1.33059e-38	5.13929e-05
1	39040121	1:39040121:G:A	ENSG00000168653	NDUFS5	chr1:39026402:39028723:clu_27195_?:ENSG00000168653	G	A	13803	0.536458	63	89	3.39368e-50	1.52743	0.0478083	3.39373e-50	1.33059e-38	5.13929e-05
1	39040217	1:39040217:C:T	ENSG00000168653	NDUFS5	chr1:39026402:39028723:clu_27195_?:ENSG00000168653	C	T	13899	0.536458	63	89	3.39368e-50	1.52743	0.0478083	3.39373e-50	1.33059e-38	5.13929e-05
1	39040217	1:39040217:C:T	ENSG00000168653	NDUFS5	chr1:39026398:39028723:clu_27195_?:ENSG00000168653	C	T	13899	0.536458	63	89	3.89856e-48	-1.49903	0.04976	3.39373e-50	1.33059e-38	5.13929e-05
1	39040324	1:39040324:A:G	ENSG00000168653	NDUFS5	chr1:39026398:39028723:clu_27195_?:ENSG00000168653	A	G	14006	0.536458	63	89	3.89856e-48	-1.49903	0.04976	3.39373e-50	1.33059e-38	5.13929e-05
1	39040324	1:39040324:A:G	ENSG00000168653	NDUFS5	chr1:39026402:39028723:clu_27195_?:ENSG00000168653	A	G	14006	0.536458	63	89	3.39368e-50	1.52743	0.0478083	3.39373e-50	1.33059e-38	5.13929e-05
1	39040469	1:39040469:A:G	ENSG00000168653	NDUFS5	chr1:39026402:39028723:clu_27195_?:ENSG00000168653	G	A	14151	0.244792	42	47	3.22678e-06	0.854468	0.171807	3.39373e-50	1.33059e-38	5.13929e-05
1	39040469	1:39040469:A:G	ENSG00000168653	NDUFS5	chr1:39026398:39028723:clu_27195_?:ENSG00000168653	G	A	14151	0.244792	42	47	7.10991e-06	-0.816158	0.170917	3.39373e-50	1.33059e-38	5.13929e-05
1	39041066	1:39041066:C:T	ENSG00000168653	NDUFS5	chr1:39026402:39028723:clu_27195_?:ENSG00000168653	C	T	14748	0.536458	63	89	3.39368e-50	1.52743	0.0478083	3.39373e-50	1.33059e-38	5.13929e-05
1	39041066	1:39041066:C:T	ENSG00000168653	NDUFS5	chr1:39026398:39028723:clu_27195_?:ENSG00000168653	C	T	14748	0.536458	63	89	3.89856e-48	-1.49903	0.04976	3.39373e-50	1.33059e-38	5.13929e-05
1	39041229	1:39041229:T:C	ENSG00000168653	NDUFS5	chr1:39026402:39028723:clu_27195_?:ENSG00000168653	T	C	14911	0.536458	63	89	3.39368e-50	1.52743	0.0478083	3.39373e-50	1.33059e-38	5.13929e-05
1	39041229	1:39041229:T:C	ENSG00000168653	NDUFS5	chr1:39026398:39028723:clu_27195_?:ENSG00000168653	T	C	14911	0.536458	63	89	3.89856e-48	-1.49903	0.04976	3.39373e-50	1.33059e-38	5.13929e-05
1	39041489	1:39041489:A:G	ENSG00000168653	NDUFS5	chr1:39026402:39028723:clu_27195_?:ENSG00000168653	G	A	15171	0.244792	42	47	3.22678e-06	0.854468	0.171807	3.39373e-50	1.33059e-38	5.13929e-05
1	39041489	1:39041489:A:G	ENSG00000168653	NDUFS5	chr1:39026398:39028723:clu_27195_?:ENSG00000168653	G	A	15171	0.244792	42	47	7.10991e-06	-0.816158	0.170917	3.39373e-50	1.33059e-38	5.13929e-05
1	39041519	1:39041519:C:T	ENSG00000168653	NDUFS5	chr1:39026402:39028723:clu_27195_?:ENSG00000168653	C	T	15201	0.536458	63	89	3.39368e-50	1.52743	0.0478083	3.39373e-50	1.33059e-38	5.13929e-05
1	39041519	1:39041519:C:T	ENSG00000168653	NDUFS5	chr1:39026398:39028723:clu_27195_?:ENSG00000168653	C	T	15201	0.536458	63	89	3.89856e-48	-1.49903	0.04976	3.39373e-50	1.33059e-38	5.13929e-05
1	39041772	1:39041772:A:G	ENSG00000168653	NDUFS5	chr1:39026398:39028723:clu_27195_?:ENSG00000168653	A	G	15454	0.536458	63	89	3.89856e-48	-1.49903	0.04976	3.39373e-50	1.33059e-38	5.13929e-05
1	39041772	1:39041772:A:G	ENSG00000168653	NDUFS5	chr1:39026402:39028723:clu_27195_?:ENSG00000168653	A	G	15454	0.536458	63	89	3.39368e-50	1.52743	0.0478083	3.39373e-50	1.33059e-38	5.13929e-05
1	39042355	1:39042355:A:G	ENSG00000168653	NDUFS5	chr1:39026398:39028723:clu_27195_?:ENSG00000168653	A	G	16037	0.536458	63	89	3.89856e-48	-1.49903	0.04976	3.39373e-50	1.33059e-38	5.13929e-05
1	39042355	1:39042355:A:G	ENSG00000168653	NDUFS5	chr1:39026402:39028723:clu_27195_?:ENSG00000168653	A	G	16037	0.536458	63	89	3.39368e-50	1.52743	0.0478083	3.39373e-50	1.33059e-38	5.13929e-05
1	39042595	1:39042595:G:A	ENSG00000168653	NDUFS5	chr1:39026402:39028723:clu_27195_?:ENSG00000168653	G	A	16277	0.536458	63	89	3.39368e-50	1.52743	0.0478083	3.39373e-50	1.33059e-38	5.13929e-05
1	39042595	1:39042595:G:A	ENSG00000168653	NDUFS5	chr1:39026398:39028723:clu_27195_?:ENSG00000168653	G	A	16277	0.536458	63	89	3.89856e-48	-1.49903	0.04976	3.39373e-50	1.33059e-38	5.13929e-05
1	39042619	1:39042619:G:A	ENSG00000168653	NDUFS5	chr1:39026398:39028723:clu_27195_?:ENSG00000168653	G	A	16301	0.536458	63	89	3.89856e-48	-1.49903	0.04976	3.39373e-50	1.33059e-38	5.13929e-05
1	39042619	1:39042619:G:A	ENSG00000168653	NDUFS5	chr1:39026402:39028723:clu_27195_?:ENSG00000168653	G	A	16301	0.536458	63	89	3.39368e-50	1.52743	0.0478083	3.39373e-50	1.33059e-38	5.13929e-05
1	39043257	1:39043257:A:G	ENSG00000168653	NDUFS5	chr1:39026402:39028723:clu_27195_?:ENSG00000168653	A	G	16939	0.598958	59	77	8.645e-23	1.3629	0.102396	3.39373e-50	1.33059e-38	5.13929e-05
1	39043257	1:39043257:A:G	ENSG00000168653	NDUFS5	chr1:39026398:39028723:clu_27195_?:ENSG00000168653	A	G	16939	0.598958	59	77	5.74081e-22	-1.32949	0.103173	3.39373e-50	1.33059e-38	5.13929e-05
1	39043362	1:39043362:C:A	ENSG00000168653	NDUFS5	chr1:39026398:39028723:clu_27195_?:ENSG00000168653	C	A	17044	0.536458	63	89	3.89856e-48	-1.49903	0.04976	3.39373e-50	1.33059e-38	5.13929e-05
1	39043362	1:39043362:C:A	ENSG00000168653	NDUFS5	chr1:39026402:39028723:clu_27195_?:ENSG00000168653	C	A	17044	0.536458	63	89	3.39368e-50	1.52743	0.0478083	3.39373e-50	1.33059e-38	5.13929e-05
1	39045623	1:39045623:C:A	ENSG00000168653	NDUFS5	chr1:39026398:39028723:clu_27195_?:ENSG00000168653	A	C	19305	0.28125	44	54	1.63515e-09	1.00436	0.149168	3.39373e-50	1.33059e-38	5.13929e-05
1	39045623	1:39045623:C:A	ENSG00000168653	NDUFS5	chr1:39026402:39028723:clu_27195_?:ENSG00000168653	A	C	19305	0.28125	44	54	9.59618e-10	-1.02996	0.150352	3.39373e-50	1.33059e-38	5.13929e-05
1	39045773	1:39045773:T:A	ENSG00000168653	NDUFS5	chr1:39026398:39028723:clu_27195_?:ENSG00000168653	A	T	19455	0.276042	46	53	7.09101e-09	-0.94859	0.148048	3.39373e-50	1.33059e-38	5.13929e-05
1	39045773	1:39045773:T:A	ENSG00000168653	NDUFS5	chr1:39026402:39028723:clu_27195_?:ENSG00000168653	A	T	19455	0.276042	46	53	2.35076e-09	0.986494	0.14828	3.39373e-50	1.33059e-38	5.13929e-05
1	39045782	1:39045782:A:C	ENSG00000168653	NDUFS5	chr1:39026402:39028723:clu_27195_?:ENSG00000168653	A	C	19464	0.53125	63	90	2.03166e-48	1.4884	0.0490078	3.39373e-50	1.33059e-38	5.13929e-05
1	39045782	1:39045782:A:C	ENSG00000168653	NDUFS5	chr1:39026398:39028723:clu_27195_?:ENSG00000168653	A	C	19464	0.53125	63	90	1.40668e-46	-1.46085	0.0507159	3.39373e-50	1.33059e-38	5.13929e-05
1	39046106	1:39046106:C:T	ENSG00000168653	NDUFS5	chr1:39026398:39028723:clu_27195_?:ENSG00000168653	T	C	19788	0.333333	53	64	5.14512e-14	1.21989	0.136265	3.39373e-50	1.33059e-38	5.13929e-05
1	39046106	1:39046106:C:T	ENSG00000168653	NDUFS5	chr1:39026402:39028723:clu_27195_?:ENSG00000168653	T	C	19788	0.333333	53	64	2.23036e-14	-1.24946	0.136873	3.39373e-50	1.33059e-38	5.13929e-05
1	39046160	1:39046160:G:A	ENSG00000168653	NDUFS5	chr1:39026398:39028723:clu_27195_?:ENSG00000168653	A	G	19842	0.239583	41	46	2.5215e-05	-0.774629	0.174145	3.39373e-50	1.33059e-38	5.13929e-05
1	39046160	1:39046160:G:A	ENSG00000168653	NDUFS5	chr1:39026402:39028723:clu_27195_?:ENSG00000168653	A	G	19842	0.239583	41	46	1.21857e-05	0.812397	0.175179	3.39373e-50	1.33059e-38	5.13929e-05
1	39046718	1:39046718:C:T	ENSG00000168653	NDUFS5	chr1:39026402:39028723:clu_27195_?:ENSG00000168653	C	T	20400	0.609375	57	75	8.43765e-20	1.27972	0.108554	3.39373e-50	1.33059e-38	5.13929e-05
1	39046718	1:39046718:C:T	ENSG00000168653	NDUFS5	chr1:39026398:39028723:clu_27195_?:ENSG00000168653	C	T	20400	0.609375	57	75	4.07614e-19	-1.24759	0.108982	3.39373e-50	1.33059e-38	5.13929e-05
1	39048028	1:39048028:G:C	ENSG00000168653	NDUFS5	chr1:39026398:39028723:clu_27195_?:ENSG00000168653	C	G	21710	0.317708	51	61	4.06895e-12	1.1897	0.1482	3.39373e-50	1.33059e-38	5.13929e-05
1	39048028	1:39048028:G:C	ENSG00000168653	NDUFS5	chr1:39026402:39028723:clu_27195_?:ENSG00000168653	C	G	21710	0.317708	51	61	2.0822e-12	-1.21849	0.149142	3.39373e-50	1.33059e-38	5.13929e-05
1	39048037	1:39048037:G:A	ENSG00000168653	NDUFS5	chr1:39026398:39028723:clu_27195_?:ENSG00000168653	G	A	21719	0.536458	63	89	3.89856e-48	-1.49903	0.04976	3.39373e-50	1.33059e-38	5.13929e-05
1	39048037	1:39048037:G:A	ENSG00000168653	NDUFS5	chr1:39026402:39028723:clu_27195_?:ENSG00000168653	G	A	21719	0.536458	63	89	3.39368e-50	1.52743	0.0478083	3.39373e-50	1.33059e-38	5.13929e-05
1	39049884	1:39049884:G:A	ENSG00000168653	NDUFS5	chr1:39026398:39028723:clu_27195_?:ENSG00000168653	G	A	23566	0.536458	63	89	3.89856e-48	-1.49903	0.04976	3.39373e-50	1.33059e-38	5.13929e-05
1	39049884	1:39049884:G:A	ENSG00000168653	NDUFS5	chr1:39026402:39028723:clu_27195_?:ENSG00000168653	G	A	23566	0.536458	63	89	3.39368e-50	1.52743	0.0478083	3.39373e-50	1.33059e-38	5.13929e-05
1	39051435	1:39051435:G:A	ENSG00000168653	NDUFS5	chr1:39026398:39028723:clu_27195_?:ENSG00000168653	G	A	25117	0.541667	63	88	4.52339e-46	-1.50231	0.0529269	3.39373e-50	1.33059e-38	5.13929e-05
1	39051435	1:39051435:G:A	ENSG00000168653	NDUFS5	chr1:39026402:39028723:clu_27195_?:ENSG00000168653	G	A	25117	0.541667	63	88	9.42653e-48	1.53023	0.0513577	3.39373e-50	1.33059e-38	5.13929e-05
1	39051550	1:39051550:T:C	ENSG00000168653	NDUFS5	chr1:39026402:39028723:clu_27195_?:ENSG00000168653	T	C	25232	0.541667	63	88	9.42653e-48	1.53023	0.0513577	3.39373e-50	1.33059e-38	5.13929e-05
1	39051550	1:39051550:T:C	ENSG00000168653	NDUFS5	chr1:39026398:39028723:clu_27195_?:ENSG00000168653	T	C	25232	0.541667	63	88	4.52339e-46	-1.50231	0.0529269	3.39373e-50	1.33059e-38	5.13929e-05
1	39052334	1:39052334:G:A	ENSG00000168653	NDUFS5	chr1:39026402:39028723:clu_27195_?:ENSG00000168653	G	A	26016	0.541667	63	88	9.42653e-48	1.53023	0.0513577	3.39373e-50	1.33059e-38	5.13929e-05
1	39052334	1:39052334:G:A	ENSG00000168653	NDUFS5	chr1:39026398:39028723:clu_27195_?:ENSG00000168653	G	A	26016	0.541667	63	88	4.52339e-46	-1.50231	0.0529269	3.39373e-50	1.33059e-38	5.13929e-05
1	39052752	1:39052752:G:A	ENSG00000168653	NDUFS5	chr1:39026402:39028723:clu_27195_?:ENSG00000168653	G	A	26434	0.541667	63	88	9.42653e-48	1.53023	0.0513577	3.39373e-50	1.33059e-38	5.13929e-05
1	39052752	1:39052752:G:A	ENSG00000168653	NDUFS5	chr1:39026398:39028723:clu_27195_?:ENSG00000168653	G	A	26434	0.541667	63	88	4.52339e-46	-1.50231	0.0529269	3.39373e-50	1.33059e-38	5.13929e-05
1	39052841	1:39052841:T:C	ENSG00000168653	NDUFS5	chr1:39026398:39028723:clu_27195_?:ENSG00000168653	T	C	26523	0.541667	63	88	4.52339e-46	-1.50231	0.0529269	3.39373e-50	1.33059e-38	5.13929e-05
1	39052841	1:39052841:T:C	ENSG00000168653	NDUFS5	chr1:39026402:39028723:clu_27195_?:ENSG00000168653	T	C	26523	0.541667	63	88	9.42653e-48	1.53023	0.0513577	3.39373e-50	1.33059e-38	5.13929e-05
1	39053051	1:39053051:T:C	ENSG00000168653	NDUFS5	chr1:39026402:39028723:clu_27195_?:ENSG00000168653	T	C	26733	0.541667	63	88	9.42653e-48	1.53023	0.0513577	3.39373e-50	1.33059e-38	5.13929e-05
1	39053051	1:39053051:T:C	ENSG00000168653	NDUFS5	chr1:39026398:39028723:clu_27195_?:ENSG00000168653	T	C	26733	0.541667	63	88	4.52339e-46	-1.50231	0.0529269	3.39373e-50	1.33059e-38	5.13929e-05
1	39053746	1:39053746:A:T	ENSG00000168653	NDUFS5	chr1:39026402:39028723:clu_27195_?:ENSG00000168653	A	T	27428	0.541667	63	88	9.42653e-48	1.53023	0.0513577	3.39373e-50	1.33059e-38	5.13929e-05
1	39053746	1:39053746:A:T	ENSG00000168653	NDUFS5	chr1:39026398:39028723:clu_27195_?:ENSG00000168653	A	T	27428	0.541667	63	88	4.52339e-46	-1.50231	0.0529269	3.39373e-50	1.33059e-38	5.13929e-05
1	39054046	1:39054046:A:G	ENSG00000168653	NDUFS5	chr1:39026402:39028723:clu_27195_?:ENSG00000168653	A	G	27728	0.541667	63	88	9.42653e-48	1.53023	0.0513577	3.39373e-50	1.33059e-38	5.13929e-05
1	39054046	1:39054046:A:G	ENSG00000168653	NDUFS5	chr1:39026398:39028723:clu_27195_?:ENSG00000168653	A	G	27728	0.541667	63	88	4.52339e-46	-1.50231	0.0529269	3.39373e-50	1.33059e-38	5.13929e-05
1	39054149	1:39054149:C:A	ENSG00000168653	NDUFS5	chr1:39026398:39028723:clu_27195_?:ENSG00000168653	C	A	27831	0.541667	63	88	4.52339e-46	-1.50231	0.0529269	3.39373e-50	1.33059e-38	5.13929e-05
1	39054149	1:39054149:C:A	ENSG00000168653	NDUFS5	chr1:39026402:39028723:clu_27195_?:ENSG00000168653	C	A	27831	0.541667	63	88	9.42653e-48	1.53023	0.0513577	3.39373e-50	1.33059e-38	5.13929e-05
1	39054637	1:39054637:T:A	ENSG00000168653	NDUFS5	chr1:39026402:39028723:clu_27195_?:ENSG00000168653	A	T	28319	0.244792	42	47	3.22678e-06	0.854468	0.171807	3.39373e-50	1.33059e-38	5.13929e-05
1	39054637	1:39054637:T:A	ENSG00000168653	NDUFS5	chr1:39026398:39028723:clu_27195_?:ENSG00000168653	A	T	28319	0.244792	42	47	7.10991e-06	-0.816158	0.170917	3.39373e-50	1.33059e-38	5.13929e-05
1	39054829	1:39054829:A:T	ENSG00000168653	NDUFS5	chr1:39026402:39028723:clu_27195_?:ENSG00000168653	A	T	28511	0.541667	63	88	9.42653e-48	1.53023	0.0513577	3.39373e-50	1.33059e-38	5.13929e-05
1	39054829	1:39054829:A:T	ENSG00000168653	NDUFS5	chr1:39026398:39028723:clu_27195_?:ENSG00000168653	A	T	28511	0.541667	63	88	4.52339e-46	-1.50231	0.0529269	3.39373e-50	1.33059e-38	5.13929e-05
1	39054880	1:39054880:G:A	ENSG00000168653	NDUFS5	chr1:39026402:39028723:clu_27195_?:ENSG00000168653	A	G	28562	0.244792	42	47	3.22678e-06	0.854468	0.171807	3.39373e-50	1.33059e-38	5.13929e-05
1	39054880	1:39054880:G:A	ENSG00000168653	NDUFS5	chr1:39026398:39028723:clu_27195_?:ENSG00000168653	A	G	28562	0.244792	42	47	7.10991e-06	-0.816158	0.170917	3.39373e-50	1.33059e-38	5.13929e-05
1	39055434	1:39055434:C:T	ENSG00000168653	NDUFS5	chr1:39026398:39028723:clu_27195_?:ENSG00000168653	C	T	29116	0.541667	63	88	4.52339e-46	-1.50231	0.0529269	3.39373e-50	1.33059e-38	5.13929e-05
1	39055434	1:39055434:C:T	ENSG00000168653	NDUFS5	chr1:39026402:39028723:clu_27195_?:ENSG00000168653	C	T	29116	0.541667	63	88	9.42653e-48	1.53023	0.0513577	3.39373e-50	1.33059e-38	5.13929e-05
1	39056137	1:39056137:C:G	ENSG00000168653	NDUFS5	chr1:39026398:39028723:clu_27195_?:ENSG00000168653	G	C	29819	0.229167	40	44	4.94674e-05	-0.786381	0.184221	3.39373e-50	1.33059e-38	5.13929e-05
1	39056137	1:39056137:C:G	ENSG00000168653	NDUFS5	chr1:39026402:39028723:clu_27195_?:ENSG00000168653	G	C	29819	0.229167	40	44	2.87669e-05	0.819541	0.185694	3.39373e-50	1.33059e-38	5.13929e-05
1	39056614	1:39056614:G:A	ENSG00000168653	NDUFS5	chr1:39026402:39028723:clu_27195_?:ENSG00000168653	G	A	30296	0.541667	63	88	9.42653e-48	1.53023	0.0513577	3.39373e-50	1.33059e-38	5.13929e-05
1	39056614	1:39056614:G:A	ENSG00000168653	NDUFS5	chr1:39026398:39028723:clu_27195_?:ENSG00000168653	G	A	30296	0.541667	63	88	4.52339e-46	-1.50231	0.0529269	3.39373e-50	1.33059e-38	5.13929e-05
1	39056616	1:39056616:G:A	ENSG00000168653	NDUFS5	chr1:39026402:39028723:clu_27195_?:ENSG00000168653	G	A	30298	0.541667	63	88	9.42653e-48	1.53023	0.0513577	3.39373e-50	1.33059e-38	5.13929e-05
1	39056616	1:39056616:G:A	ENSG00000168653	NDUFS5	chr1:39026398:39028723:clu_27195_?:ENSG00000168653	G	A	30298	0.541667	63	88	4.52339e-46	-1.50231	0.0529269	3.39373e-50	1.33059e-38	5.13929e-05
1	39058057	1:39058057:C:G	ENSG00000168653	NDUFS5	chr1:39026402:39028723:clu_27195_?:ENSG00000168653	G	C	31739	0.197917	35	38	1.19e-07	1.05316	0.18269	3.39373e-50	1.33059e-38	5.13929e-05
1	39058057	1:39058057:C:G	ENSG00000168653	NDUFS5	chr1:39026398:39028723:clu_27195_?:ENSG00000168653	G	C	31739	0.197917	35	38	5.18488e-08	-1.06344	0.17853	3.39373e-50	1.33059e-38	5.13929e-05
1	39059137	1:39059137:G:A	ENSG00000168653	NDUFS5	chr1:39026402:39028723:clu_27195_?:ENSG00000168653	A	G	32819	0.270833	46	52	3.08489e-08	0.959385	0.157913	3.39373e-50	1.33059e-38	5.13929e-05
1	39059137	1:39059137:G:A	ENSG00000168653	NDUFS5	chr1:39026398:39028723:clu_27195_?:ENSG00000168653	A	G	32819	0.270833	46	52	6.71818e-08	-0.926376	0.157091	3.39373e-50	1.33059e-38	5.13929e-05
1	39059405	1:39059405:T:A	ENSG00000168653	NDUFS5	chr1:39026398:39028723:clu_27195_?:ENSG00000168653	T	A	33087	0.567708	61	83	9.62626e-26	-1.33761	0.0899281	3.39373e-50	1.33059e-38	5.13929e-05
1	39059405	1:39059405:T:A	ENSG00000168653	NDUFS5	chr1:39026402:39028723:clu_27195_?:ENSG00000168653	T	A	33087	0.567708	61	83	1.32138e-26	1.36805	0.0891553	3.39373e-50	1.33059e-38	5.13929e-05
1	39059529	1:39059529:T:C	ENSG00000168653	NDUFS5	chr1:39026398:39028723:clu_27195_?:ENSG00000168653	T	C	33211	0.578125	61	81	1.09001e-25	-1.36695	0.0920817	3.39373e-50	1.33059e-38	5.13929e-05
1	39059529	1:39059529:T:C	ENSG00000168653	NDUFS5	chr1:39026402:39028723:clu_27195_?:ENSG00000168653	T	C	33211	0.578125	61	81	1.47414e-26	1.39819	0.091275	3.39373e-50	1.33059e-38	5.13929e-05
1	39059752	1:39059752:C:A	ENSG00000168653	NDUFS5	chr1:39026402:39028723:clu_27195_?:ENSG00000168653	C	A	33434	0.536458	63	89	3.39368e-50	1.52743	0.0478083	3.39373e-50	1.33059e-38	5.13929e-05
1	39059752	1:39059752:C:A	ENSG00000168653	NDUFS5	chr1:39026398:39028723:clu_27195_?:ENSG00000168653	C	A	33434	0.536458	63	89	3.89856e-48	-1.49903	0.04976	3.39373e-50	1.33059e-38	5.13929e-05
1	39060413	1:39060413:T:G	ENSG00000168653	NDUFS5	chr1:39026398:39028723:clu_27195_?:ENSG00000168653	T	G	34095	0.572917	61	82	1.85117e-26	-1.3674	0.0895823	3.39373e-50	1.33059e-38	5.13929e-05
1	39060413	1:39060413:T:G	ENSG00000168653	NDUFS5	chr1:39026402:39028723:clu_27195_?:ENSG00000168653	T	G	34095	0.572917	61	82	2.04594e-27	1.39914	0.0885945	3.39373e-50	1.33059e-38	5.13929e-05
1	39060677	1:39060677:A:G	ENSG00000168653	NDUFS5	chr1:39026398:39028723:clu_27195_?:ENSG00000168653	A	G	34359	0.572917	61	82	1.85117e-26	-1.3674	0.0895823	3.39373e-50	1.33059e-38	5.13929e-05
1	39060677	1:39060677:A:G	ENSG00000168653	NDUFS5	chr1:39026402:39028723:clu_27195_?:ENSG00000168653	A	G	34359	0.572917	61	82	2.04594e-27	1.39914	0.0885945	3.39373e-50	1.33059e-38	5.13929e-05
1	39060874	1:39060874:C:A	ENSG00000168653	NDUFS5	chr1:39026402:39028723:clu_27195_?:ENSG00000168653	A	C	34556	0.369792	59	71	1.63409e-20	-1.42646	0.117435	3.39373e-50	1.33059e-38	5.13929e-05
1	39060874	1:39060874:C:A	ENSG00000168653	NDUFS5	chr1:39026398:39028723:clu_27195_?:ENSG00000168653	A	C	34556	0.369792	59	71	4.72635e-20	1.39663	0.117218	3.39373e-50	1.33059e-38	5.13929e-05
1	39060918	1:39060918:C:A	ENSG00000168653	NDUFS5	chr1:39026398:39028723:clu_27195_?:ENSG00000168653	C	A	34600	0.598958	59	77	5.74081e-22	-1.32949	0.103173	3.39373e-50	1.33059e-38	5.13929e-05
1	39060918	1:39060918:C:A	ENSG00000168653	NDUFS5	chr1:39026402:39028723:clu_27195_?:ENSG00000168653	C	A	34600	0.598958	59	77	8.645e-23	1.3629	0.102396	3.39373e-50	1.33059e-38	5.13929e-05
1	39060993	1:39060993:G:A	ENSG00000168653	NDUFS5	chr1:39026402:39028723:clu_27195_?:ENSG00000168653	G	A	34675	0.572917	61	82	2.04594e-27	1.39914	0.0885945	3.39373e-50	1.33059e-38	5.13929e-05
1	39060993	1:39060993:G:A	ENSG00000168653	NDUFS5	chr1:39026398:39028723:clu_27195_?:ENSG00000168653	G	A	34675	0.572917	61	82	1.85117e-26	-1.3674	0.0895823	3.39373e-50	1.33059e-38	5.13929e-05
1	39061347	1:39061347:G:T	ENSG00000168653	NDUFS5	chr1:39026398:39028723:clu_27195_?:ENSG00000168653	G	T	35029	0.572917	61	82	1.85117e-26	-1.3674	0.0895823	3.39373e-50	1.33059e-38	5.13929e-05
1	39061347	1:39061347:G:T	ENSG00000168653	NDUFS5	chr1:39026402:39028723:clu_27195_?:ENSG00000168653	G	T	35029	0.572917	61	82	2.04594e-27	1.39914	0.0885945	3.39373e-50	1.33059e-38	5.13929e-05
1	39062088	1:39062088:G:A	ENSG00000168653	NDUFS5	chr1:39026402:39028723:clu_27195_?:ENSG00000168653	G	A	35770	0.572917	61	82	2.04594e-27	1.39914	0.0885945	3.39373e-50	1.33059e-38	5.13929e-05
1	39062088	1:39062088:G:A	ENSG00000168653	NDUFS5	chr1:39026398:39028723:clu_27195_?:ENSG00000168653	G	A	35770	0.572917	61	82	1.85117e-26	-1.3674	0.0895823	3.39373e-50	1.33059e-38	5.13929e-05
1	39062239	1:39062239:A:C	ENSG00000168653	NDUFS5	chr1:39026398:39028723:clu_27195_?:ENSG00000168653	A	C	35921	0.572917	61	82	1.85117e-26	-1.3674	0.0895823	3.39373e-50	1.33059e-38	5.13929e-05
1	39062239	1:39062239:A:C	ENSG00000168653	NDUFS5	chr1:39026402:39028723:clu_27195_?:ENSG00000168653	A	C	35921	0.572917	61	82	2.04594e-27	1.39914	0.0885945	3.39373e-50	1.33059e-38	5.13929e-05
1	39062399	1:39062399:G:A	ENSG00000168653	NDUFS5	chr1:39026402:39028723:clu_27195_?:ENSG00000168653	G	A	36081	0.598958	59	77	8.645e-23	1.3629	0.102396	3.39373e-50	1.33059e-38	5.13929e-05
1	39062399	1:39062399:G:A	ENSG00000168653	NDUFS5	chr1:39026398:39028723:clu_27195_?:ENSG00000168653	G	A	36081	0.598958	59	77	5.74081e-22	-1.32949	0.103173	3.39373e-50	1.33059e-38	5.13929e-05
1	39062412	1:39062412:G:A	ENSG00000168653	NDUFS5	chr1:39026398:39028723:clu_27195_?:ENSG00000168653	G	A	36094	0.572917	61	82	1.85117e-26	-1.3674	0.0895823	3.39373e-50	1.33059e-38	5.13929e-05
1	39062412	1:39062412:G:A	ENSG00000168653	NDUFS5	chr1:39026402:39028723:clu_27195_?:ENSG00000168653	G	A	36094	0.572917	61	82	2.04594e-27	1.39914	0.0885945	3.39373e-50	1.33059e-38	5.13929e-05
1	39063490	1:39063490:C:A	ENSG00000168653	NDUFS5	chr1:39026398:39028723:clu_27195_?:ENSG00000168653	A	C	37172	0.265625	46	51	1.92257e-07	-0.927132	0.164013	3.39373e-50	1.33059e-38	5.13929e-05
1	39063490	1:39063490:C:A	ENSG00000168653	NDUFS5	chr1:39026402:39028723:clu_27195_?:ENSG00000168653	A	C	37172	0.265625	46	51	9.25639e-08	0.960574	0.164961	3.39373e-50	1.33059e-38	5.13929e-05
1	39063586	1:39063586:G:A	ENSG00000168653	NDUFS5	chr1:39026402:39028723:clu_27195_?:ENSG00000168653	G	A	37268	0.572917	61	82	2.04594e-27	1.39914	0.0885945	3.39373e-50	1.33059e-38	5.13929e-05
1	39063586	1:39063586:G:A	ENSG00000168653	NDUFS5	chr1:39026398:39028723:clu_27195_?:ENSG00000168653	G	A	37268	0.572917	61	82	1.85117e-26	-1.3674	0.0895823	3.39373e-50	1.33059e-38	5.13929e-05
1	39064048	1:39064048:T:C	ENSG00000168653	NDUFS5	chr1:39026398:39028723:clu_27195_?:ENSG00000168653	C	T	37730	0.328125	53	63	3.26001e-13	1.23699	0.144464	3.39373e-50	1.33059e-38	5.13929e-05
1	39064048	1:39064048:T:C	ENSG00000168653	NDUFS5	chr1:39026402:39028723:clu_27195_?:ENSG00000168653	C	T	37730	0.328125	53	63	1.61483e-13	-1.26595	0.145327	3.39373e-50	1.33059e-38	5.13929e-05
1	39064049	1:39064049:G:A	ENSG00000168653	NDUFS5	chr1:39026398:39028723:clu_27195_?:ENSG00000168653	A	G	37731	0.328125	53	63	3.26001e-13	1.23699	0.144464	3.39373e-50	1.33059e-38	5.13929e-05
1	39064049	1:39064049:G:A	ENSG00000168653	NDUFS5	chr1:39026402:39028723:clu_27195_?:ENSG00000168653	A	G	37731	0.328125	53	63	1.61483e-13	-1.26595	0.145327	3.39373e-50	1.33059e-38	5.13929e-05
1	39064218	1:39064218:T:G	ENSG00000168653	NDUFS5	chr1:39026398:39028723:clu_27195_?:ENSG00000168653	G	T	37900	0.276042	47	53	7.89535e-08	-0.916777	0.156451	3.39373e-50	1.33059e-38	5.13929e-05
1	39064218	1:39064218:T:G	ENSG00000168653	NDUFS5	chr1:39026402:39028723:clu_27195_?:ENSG00000168653	G	T	37900	0.276042	47	53	2.95388e-08	0.954866	0.156914	3.39373e-50	1.33059e-38	5.13929e-05
1	39064221	1:39064221:A:T	ENSG00000168653	NDUFS5	chr1:39026402:39028723:clu_27195_?:ENSG00000168653	T	A	37903	0.333333	53	64	3.09244e-12	-1.18209	0.14619	3.39373e-50	1.33059e-38	5.13929e-05
1	39064221	1:39064221:A:T	ENSG00000168653	NDUFS5	chr1:39026398:39028723:clu_27195_?:ENSG00000168653	T	A	37903	0.333333	53	64	5.53438e-12	1.15551	0.145123	3.39373e-50	1.33059e-38	5.13929e-05
1	39064257	1:39064257:C:T	ENSG00000168653	NDUFS5	chr1:39026398:39028723:clu_27195_?:ENSG00000168653	C	T	37939	0.572917	61	82	1.85117e-26	-1.3674	0.0895823	3.39373e-50	1.33059e-38	5.13929e-05
1	39064257	1:39064257:C:T	ENSG00000168653	NDUFS5	chr1:39026402:39028723:clu_27195_?:ENSG00000168653	C	T	37939	0.572917	61	82	2.04594e-27	1.39914	0.0885945	3.39373e-50	1.33059e-38	5.13929e-05
1	39064315	1:39064315:T:C	ENSG00000168653	NDUFS5	chr1:39026398:39028723:clu_27195_?:ENSG00000168653	T	C	37997	0.567708	62	83	1.54035e-15	-1.17988	0.121732	3.39373e-50	1.33059e-38	5.13929e-05
1	39064315	1:39064315:T:C	ENSG00000168653	NDUFS5	chr1:39026402:39028723:clu_27195_?:ENSG00000168653	T	C	37997	0.567708	62	83	4.77817e-16	1.2108	0.121813	3.39373e-50	1.33059e-38	5.13929e-05
1	39064333	1:39064333:T:A	ENSG00000168653	NDUFS5	chr1:39026398:39028723:clu_27195_?:ENSG00000168653	A	T	38015	0.244792	42	47	7.10991e-06	-0.816158	0.170917	3.39373e-50	1.33059e-38	5.13929e-05
1	39064333	1:39064333:T:A	ENSG00000168653	NDUFS5	chr1:39026402:39028723:clu_27195_?:ENSG00000168653	A	T	38015	0.244792	42	47	3.22678e-06	0.854468	0.171807	3.39373e-50	1.33059e-38	5.13929e-05
1	39064910	1:39064910:G:A	ENSG00000168653	NDUFS5	chr1:39026398:39028723:clu_27195_?:ENSG00000168653	A	G	38592	0.328125	53	63	3.26001e-13	1.23699	0.144464	3.39373e-50	1.33059e-38	5.13929e-05
1	39064910	1:39064910:G:A	ENSG00000168653	NDUFS5	chr1:39026402:39028723:clu_27195_?:ENSG00000168653	A	G	38592	0.328125	53	63	1.61483e-13	-1.26595	0.145327	3.39373e-50	1.33059e-38	5.13929e-05
1	39065239	1:39065239:G:A	ENSG00000168653	NDUFS5	chr1:39026402:39028723:clu_27195_?:ENSG00000168653	G	A	38921	0.572917	61	82	2.04594e-27	1.39914	0.0885945	3.39373e-50	1.33059e-38	5.13929e-05
1	39065239	1:39065239:G:A	ENSG00000168653	NDUFS5	chr1:39026398:39028723:clu_27195_?:ENSG00000168653	G	A	38921	0.572917	61	82	1.85117e-26	-1.3674	0.0895823	3.39373e-50	1.33059e-38	5.13929e-05
1	39066329	1:39066329:A:C	ENSG00000168653	NDUFS5	chr1:39026402:39028723:clu_27195_?:ENSG00000168653	A	C	40011	0.578125	61	81	1.47414e-26	1.39819	0.091275	3.39373e-50	1.33059e-38	5.13929e-05
1	39066329	1:39066329:A:C	ENSG00000168653	NDUFS5	chr1:39026398:39028723:clu_27195_?:ENSG00000168653	A	C	40011	0.578125	61	81	1.09001e-25	-1.36695	0.0920817	3.39373e-50	1.33059e-38	5.13929e-05
1	39066699	1:39066699:C:G	ENSG00000168653	NDUFS5	chr1:39026398:39028723:clu_27195_?:ENSG00000168653	C	G	40381	0.578125	61	81	1.09001e-25	-1.36695	0.0920817	3.39373e-50	1.33059e-38	5.13929e-05
1	39066699	1:39066699:C:G	ENSG00000168653	NDUFS5	chr1:39026402:39028723:clu_27195_?:ENSG00000168653	C	G	40381	0.578125	61	81	1.47414e-26	1.39819	0.091275	3.39373e-50	1.33059e-38	5.13929e-05
1	39067729	1:39067729:C:T	ENSG00000168653	NDUFS5	chr1:39026398:39028723:clu_27195_?:ENSG00000168653	C	T	41411	0.598958	59	77	5.74081e-22	-1.32949	0.103173	3.39373e-50	1.33059e-38	5.13929e-05
1	39067729	1:39067729:C:T	ENSG00000168653	NDUFS5	chr1:39026402:39028723:clu_27195_?:ENSG00000168653	C	T	41411	0.598958	59	77	8.645e-23	1.3629	0.102396	3.39373e-50	1.33059e-38	5.13929e-05
1	39068001	1:39068001:G:T	ENSG00000168653	NDUFS5	chr1:39026398:39028723:clu_27195_?:ENSG00000168653	G	T	41683	0.598958	59	77	5.74081e-22	-1.32949	0.103173	3.39373e-50	1.33059e-38	5.13929e-05
1	39068001	1:39068001:G:T	ENSG00000168653	NDUFS5	chr1:39026402:39028723:clu_27195_?:ENSG00000168653	G	T	41683	0.598958	59	77	8.645e-23	1.3629	0.102396	3.39373e-50	1.33059e-38	5.13929e-05
1	39068137	1:39068137:T:C	ENSG00000168653	NDUFS5	chr1:39026402:39028723:clu_27195_?:ENSG00000168653	T	C	41819	0.604167	59	76	4.32446e-22	1.36049	0.105064	3.39373e-50	1.33059e-38	5.13929e-05
1	39068137	1:39068137:T:C	ENSG00000168653	NDUFS5	chr1:39026398:39028723:clu_27195_?:ENSG00000168653	T	C	41819	0.604167	59	76	2.46701e-21	-1.32759	0.105678	3.39373e-50	1.33059e-38	5.13929e-05
1	39069587	1:39069587:C:T	ENSG00000168653	NDUFS5	chr1:39026398:39028723:clu_27195_?:ENSG00000168653	T	C	43269	0.255208	44	49	1.48123e-08	1.17529	0.188294	3.39373e-50	1.33059e-38	5.13929e-05
1	39069587	1:39069587:C:T	ENSG00000168653	NDUFS5	chr1:39026402:39028723:clu_27195_?:ENSG00000168653	T	C	43269	0.255208	44	49	1.50457e-08	-1.1912	0.190951	3.39373e-50	1.33059e-38	5.13929e-05
1	39071619	1:39071619:C:T	ENSG00000168653	NDUFS5	chr1:39026402:39028723:clu_27195_?:ENSG00000168653	T	C	45301	0.307292	51	59	1.56281e-08	-1.04228	0.167309	3.39373e-50	1.33059e-38	5.13929e-05
1	39071619	1:39071619:C:T	ENSG00000168653	NDUFS5	chr1:39026398:39028723:clu_27195_?:ENSG00000168653	T	C	45301	0.307292	51	59	1.67848e-08	1.0261	0.16514	3.39373e-50	1.33059e-38	5.13929e-05
1	39074529	1:39074529:C:T	ENSG00000168653	NDUFS5	chr1:39026398:39028723:clu_27195_?:ENSG00000168653	T	C	48211	0.307292	51	59	1.67848e-08	1.0261	0.16514	3.39373e-50	1.33059e-38	5.13929e-05
1	39074529	1:39074529:C:T	ENSG00000168653	NDUFS5	chr1:39026402:39028723:clu_27195_?:ENSG00000168653	T	C	48211	0.307292	51	59	1.56281e-08	-1.04228	0.167309	3.39373e-50	1.33059e-38	5.13929e-05
1	39074766	1:39074766:G:A	ENSG00000168653	NDUFS5	chr1:39026402:39028723:clu_27195_?:ENSG00000168653	A	G	48448	0.161458	29	31	2.36523e-05	0.905438	0.202785	3.39373e-50	1.33059e-38	5.13929e-05
1	39074766	1:39074766:G:A	ENSG00000168653	NDUFS5	chr1:39026398:39028723:clu_27195_?:ENSG00000168653	A	G	48448	0.161458	29	31	2.01035e-05	-0.899923	0.199644	3.39373e-50	1.33059e-38	5.13929e-05
1	39075242	1:39075242:A:C	ENSG00000168653	NDUFS5	chr1:39026398:39028723:clu_27195_?:ENSG00000168653	C	A	48924	0.286458	47	55	9.32658e-07	0.930884	0.176394	3.39373e-50	1.33059e-38	5.13929e-05
1	39075242	1:39075242:A:C	ENSG00000168653	NDUFS5	chr1:39026402:39028723:clu_27195_?:ENSG00000168653	C	A	48924	0.286458	47	55	8.25702e-07	-0.94784	0.178613	3.39373e-50	1.33059e-38	5.13929e-05
1	39076040	1:39076040:G:T	ENSG00000168653	NDUFS5	chr1:39026398:39028723:clu_27195_?:ENSG00000168653	T	G	49722	0.286458	47	55	9.32658e-07	0.930884	0.176394	3.39373e-50	1.33059e-38	5.13929e-05
1	39076040	1:39076040:G:T	ENSG00000168653	NDUFS5	chr1:39026402:39028723:clu_27195_?:ENSG00000168653	T	G	49722	0.286458	47	55	8.25702e-07	-0.94784	0.178613	3.39373e-50	1.33059e-38	5.13929e-05
1	39077751	1:39077751:C:A	ENSG00000168653	NDUFS5	chr1:39026398:39028723:clu_27195_?:ENSG00000168653	A	C	51433	0.354167	55	68	2.26655e-07	0.845059	0.150523	3.39373e-50	1.33059e-38	5.13929e-05
1	39077751	1:39077751:C:A	ENSG00000168653	NDUFS5	chr1:39026402:39028723:clu_27195_?:ENSG00000168653	A	C	51433	0.354167	55	68	1.98145e-07	-0.860375	0.152394	3.39373e-50	1.33059e-38	5.13929e-05
1	39078967	1:39078967:G:A	ENSG00000168653	NDUFS5	chr1:39026398:39028723:clu_27195_?:ENSG00000168653	A	G	52649	0.286458	47	55	9.32658e-07	0.930884	0.176394	3.39373e-50	1.33059e-38	5.13929e-05
1	39078967	1:39078967:G:A	ENSG00000168653	NDUFS5	chr1:39026402:39028723:clu_27195_?:ENSG00000168653	A	G	52649	0.286458	47	55	8.25702e-07	-0.94784	0.178613	3.39373e-50	1.33059e-38	5.13929e-05
1	39079835	1:39079835:G:A	ENSG00000168653	NDUFS5	chr1:39026402:39028723:clu_27195_?:ENSG00000168653	A	G	53517	0.390625	63	75	1.87629e-09	-0.999	0.149043	3.39373e-50	1.33059e-38	5.13929e-05
1	39079835	1:39079835:G:A	ENSG00000168653	NDUFS5	chr1:39026398:39028723:clu_27195_?:ENSG00000168653	A	G	53517	0.390625	63	75	3.10923e-09	0.9743	0.147823	3.39373e-50	1.33059e-38	5.13929e-05
1	39082945	1:39082945:G:C	ENSG00000168653	NDUFS5	chr1:39026398:39028723:clu_27195_?:ENSG00000168653	C	G	56627	0.375	58	72	4.53612e-06	0.759042	0.155273	3.39373e-50	1.33059e-38	5.13929e-05
1	39082945	1:39082945:G:C	ENSG00000168653	NDUFS5	chr1:39026402:39028723:clu_27195_?:ENSG00000168653	C	G	56627	0.375	58	72	5.06462e-06	-0.766191	0.157627	3.39373e-50	1.33059e-38	5.13929e-05
1	40491966	1:40491966:A:T	ENSG00000238287	AL603839.3	chr1:40493688:40508589:clu_27256_?:ENSG00000238287	A	T	-16695	0.5625	66	84	1.76187e-05	-0.826279	0.181917	7.0272e-06	0.0330426	6.14251e-05
1	40500786	1:40500786:G:C	ENSG00000238287	AL603839.3	chr1:40493688:40508589:clu_27256_?:ENSG00000238287	G	C	-7875	0.5625	66	84	1.76187e-05	-0.826279	0.181917	7.0272e-06	0.0330426	6.14251e-05
1	40502170	1:40502170:T:A	ENSG00000238287	AL603839.3	chr1:40493688:40508589:clu_27256_?:ENSG00000238287	T	A	-6491	0.546875	66	87	1.0497e-05	-0.808096	0.172824	7.0272e-06	0.0330426	6.14251e-05
1	40505634	1:40505634:T:C	ENSG00000238287	AL603839.3	chr1:40493688:40508589:clu_27256_?:ENSG00000238287	T	C	-3027	0.5625	66	84	1.76187e-05	-0.826279	0.181917	7.0272e-06	0.0330426	6.14251e-05
1	40506724	1:40506724:G:A	ENSG00000238287	AL603839.3	chr1:40493688:40508589:clu_27256_?:ENSG00000238287	G	A	-1937	0.5625	66	84	1.76187e-05	-0.826279	0.181917	7.0272e-06	0.0330426	6.14251e-05
1	40509127	1:40509127:T:C	ENSG00000238287	AL603839.3	chr1:40493688:40508589:clu_27256_?:ENSG00000238287	T	C	466	0.567708	65	83	7.0272e-06	-0.865558	0.18115	7.0272e-06	0.0330426	6.14251e-05
1	40509588	1:40509588:G:C	ENSG00000238287	AL603839.3	chr1:40493688:40508589:clu_27256_?:ENSG00000238287	G	C	927	0.5625	66	84	2.77703e-05	-0.81392	0.184031	7.0272e-06	0.0330426	6.14251e-05
1	40521939	1:40521939:A:G	ENSG00000238287	AL603839.3	chr1:40493688:40508589:clu_27256_?:ENSG00000238287	A	G	13278	0.567708	65	83	7.0272e-06	-0.865558	0.18115	7.0272e-06	0.0330426	6.14251e-05
1	40524109	1:40524109:T:C	ENSG00000238287	AL603839.3	chr1:40493688:40508589:clu_27256_?:ENSG00000238287	T	C	15448	0.572917	65	82	4.2272e-05	-0.803146	0.186305	7.0272e-06	0.0330426	6.14251e-05
1	40527016	1:40527016:C:A	ENSG00000238287	AL603839.3	chr1:40493688:40508589:clu_27256_?:ENSG00000238287	C	A	18355	0.5625	66	84	2.77703e-05	-0.81392	0.184031	7.0272e-06	0.0330426	6.14251e-05
1	40532734	1:40532734:G:T	ENSG00000238287	AL603839.3	chr1:40493688:40508589:clu_27256_?:ENSG00000238287	G	T	24073	0.567708	65	83	7.0272e-06	-0.865558	0.18115	7.0272e-06	0.0330426	6.14251e-05
1	40538349	1:40538349:C:T	ENSG00000238287	AL603839.3	chr1:40493688:40508589:clu_27256_?:ENSG00000238287	C	T	29688	0.5625	66	84	2.77703e-05	-0.81392	0.184031	7.0272e-06	0.0330426	6.14251e-05
1	40539275	1:40539275:T:C	ENSG00000238287	AL603839.3	chr1:40493688:40508589:clu_27256_?:ENSG00000238287	T	C	30614	0.567708	65	83	7.0272e-06	-0.865558	0.18115	7.0272e-06	0.0330426	6.14251e-05
1	40539329	1:40539329:T:C	ENSG00000238287	AL603839.3	chr1:40493688:40508589:clu_27256_?:ENSG00000238287	T	C	30668	0.5625	66	84	2.77703e-05	-0.81392	0.184031	7.0272e-06	0.0330426	6.14251e-05
1	40539533	1:40539533:C:A	ENSG00000238287	AL603839.3	chr1:40493688:40508589:clu_27256_?:ENSG00000238287	C	A	30872	0.567708	65	83	7.0272e-06	-0.865558	0.18115	7.0272e-06	0.0330426	6.14251e-05
1	40539833	1:40539833:G:C	ENSG00000238287	AL603839.3	chr1:40493688:40508589:clu_27256_?:ENSG00000238287	G	C	31172	0.5625	66	84	2.77703e-05	-0.81392	0.184031	7.0272e-06	0.0330426	6.14251e-05
1	40543371	1:40543371:A:G	ENSG00000238287	AL603839.3	chr1:40493688:40508589:clu_27256_?:ENSG00000238287	A	G	34710	0.5625	66	84	2.77703e-05	-0.81392	0.184031	7.0272e-06	0.0330426	6.14251e-05
1	40547588	1:40547588:C:T	ENSG00000238287	AL603839.3	chr1:40493688:40508589:clu_27256_?:ENSG00000238287	C	T	38927	0.567708	65	83	7.0272e-06	-0.865558	0.18115	7.0272e-06	0.0330426	6.14251e-05
1	40554624	1:40554624:G:A	ENSG00000238287	AL603839.3	chr1:40493688:40508589:clu_27256_?:ENSG00000238287	G	A	45963	0.567708	65	83	7.0272e-06	-0.865558	0.18115	7.0272e-06	0.0330426	6.14251e-05
1	40554670	1:40554670:A:C	ENSG00000238287	AL603839.3	chr1:40493688:40508589:clu_27256_?:ENSG00000238287	A	C	46009	0.567708	65	83	7.0272e-06	-0.865558	0.18115	7.0272e-06	0.0330426	6.14251e-05
1	40556304	1:40556304:A:G	ENSG00000238287	AL603839.3	chr1:40493688:40508589:clu_27256_?:ENSG00000238287	A	G	47643	0.567708	65	83	7.0272e-06	-0.865558	0.18115	7.0272e-06	0.0330426	6.14251e-05
1	40557839	1:40557839:A:G	ENSG00000238287	AL603839.3	chr1:40493688:40508589:clu_27256_?:ENSG00000238287	A	G	49178	0.567708	65	83	7.0272e-06	-0.865558	0.18115	7.0272e-06	0.0330426	6.14251e-05
1	40558265	1:40558265:A:G	ENSG00000238287	AL603839.3	chr1:40493688:40508589:clu_27256_?:ENSG00000238287	A	G	49604	0.515625	71	93	2.98516e-05	-0.798514	0.181332	7.0272e-06	0.0330426	6.14251e-05
1	40561692	1:40561692:A:G	ENSG00000238287	AL603839.3	chr1:40493688:40508589:clu_27256_?:ENSG00000238287	A	G	53031	0.567708	65	83	7.0272e-06	-0.865558	0.18115	7.0272e-06	0.0330426	6.14251e-05
1	40564815	1:40564815:C:T	ENSG00000238287	AL603839.3	chr1:40493688:40508589:clu_27256_?:ENSG00000238287	C	T	56154	0.598958	60	77	2.83854e-05	-0.803207	0.181847	7.0272e-06	0.0330426	6.14251e-05
1	40568404	1:40568404:G:A	ENSG00000238287	AL603839.3	chr1:40493688:40508589:clu_27256_?:ENSG00000238287	G	A	59743	0.598958	61	77	4.89249e-05	-0.788998	0.184706	7.0272e-06	0.0330426	6.14251e-05
1	40570113	1:40570113:A:G	ENSG00000238287	AL603839.3	chr1:40493688:40508589:clu_27256_?:ENSG00000238287	A	G	61452	0.598958	61	77	4.89249e-05	-0.788998	0.184706	7.0272e-06	0.0330426	6.14251e-05
1	45384647	1:45384647:T:C	ENSG00000132781	MUTYH	chr1:45329437:45329889:clu_27410_?:ENSG00000132781	C	T	43754	0.369792	52	71	8.90429e-07	-0.68049	0.128674	8.90429e-07	0.0212861	3.95901e-05
1	45386893	1:45386893:C:A	ENSG00000132781	MUTYH	chr1:45329437:45329889:clu_27410_?:ENSG00000132781	A	C	46000	0.0989583	16	19	8.20682e-06	0.823752	0.173834	8.90429e-07	0.0212861	3.95901e-05
1	54711973	1:54711973:T:C	ENSG00000243725	TTC4	chr1:54722799:54728346:clu_27650_?:ENSG00000243725	C	T	-3888	0.109375	21	21	8.08969e-09	-1.10331	0.172992	8.08969e-09	0.0209791	1.50075e-05
1	54711988	1:54711988:G:A	ENSG00000243725	TTC4	chr1:54722799:54728346:clu_27650_?:ENSG00000243725	A	G	-3873	0.109375	21	21	8.08969e-09	-1.10331	0.172992	8.08969e-09	0.0209791	1.50075e-05
1	54712745	1:54712745:T:C	ENSG00000243725	TTC4	chr1:54722799:54728346:clu_27650_?:ENSG00000243725	C	T	-3116	0.119792	22	23	5.87681e-07	-0.900414	0.167106	8.08969e-09	0.0209791	1.50075e-05
1	54712759	1:54712759:A:C	ENSG00000243725	TTC4	chr1:54722799:54728346:clu_27650_?:ENSG00000243725	C	A	-3102	0.119792	22	23	5.87681e-07	-0.900414	0.167106	8.08969e-09	0.0209791	1.50075e-05
1	54712797	1:54712797:G:T	ENSG00000243725	TTC4	chr1:54722799:54728346:clu_27650_?:ENSG00000243725	T	G	-3064	0.119792	22	23	5.87681e-07	-0.900414	0.167106	8.08969e-09	0.0209791	1.50075e-05
1	54712836	1:54712836:G:C	ENSG00000243725	TTC4	chr1:54722799:54728346:clu_27650_?:ENSG00000243725	C	G	-3025	0.119792	22	23	5.87681e-07	-0.900414	0.167106	8.08969e-09	0.0209791	1.50075e-05
1	54712859	1:54712859:C:T	ENSG00000243725	TTC4	chr1:54722799:54728346:clu_27650_?:ENSG00000243725	T	C	-3002	0.0729167	14	14	3.69887e-06	-1.12467	0.227693	8.08969e-09	0.0209791	1.50075e-05
1	54713026	1:54713026:G:T	ENSG00000243725	TTC4	chr1:54722799:54728346:clu_27650_?:ENSG00000243725	T	G	-2835	0.0729167	14	14	3.69887e-06	-1.12467	0.227693	8.08969e-09	0.0209791	1.50075e-05
1	54713066	1:54713066:G:C	ENSG00000243725	TTC4	chr1:54722799:54728346:clu_27650_?:ENSG00000243725	C	G	-2795	0.119792	22	23	5.87681e-07	-0.900414	0.167106	8.08969e-09	0.0209791	1.50075e-05
1	54713088	1:54713088:C:A	ENSG00000243725	TTC4	chr1:54722799:54728346:clu_27650_?:ENSG00000243725	A	C	-2773	0.119792	22	23	5.87681e-07	-0.900414	0.167106	8.08969e-09	0.0209791	1.50075e-05
1	54713483	1:54713483:G:T	ENSG00000243725	TTC4	chr1:54722799:54728346:clu_27650_?:ENSG00000243725	T	G	-2378	0.0729167	14	14	3.69887e-06	-1.12467	0.227693	8.08969e-09	0.0209791	1.50075e-05
1	54713582	1:54713582:T:G	ENSG00000243725	TTC4	chr1:54722799:54728346:clu_27650_?:ENSG00000243725	G	T	-2279	0.119792	22	23	5.87681e-07	-0.900414	0.167106	8.08969e-09	0.0209791	1.50075e-05
1	54713837	1:54713837:G:C	ENSG00000243725	TTC4	chr1:54722799:54728346:clu_27650_?:ENSG00000243725	C	G	-2024	0.130208	24	25	4.52106e-06	-0.824103	0.168553	8.08969e-09	0.0209791	1.50075e-05
1	54714137	1:54714137:C:T	ENSG00000243725	TTC4	chr1:54722799:54728346:clu_27650_?:ENSG00000243725	T	C	-1724	0.119792	22	23	5.87681e-07	-0.900414	0.167106	8.08969e-09	0.0209791	1.50075e-05
1	54714358	1:54714358:A:G	ENSG00000243725	TTC4	chr1:54722799:54728346:clu_27650_?:ENSG00000243725	G	A	-1503	0.119792	22	23	5.87681e-07	-0.900414	0.167106	8.08969e-09	0.0209791	1.50075e-05
1	54714544	1:54714544:C:T	ENSG00000243725	TTC4	chr1:54722799:54728346:clu_27650_?:ENSG00000243725	T	C	-1317	0.0729167	14	14	3.69887e-06	-1.12467	0.227693	8.08969e-09	0.0209791	1.50075e-05
1	54715807	1:54715807:A:G	ENSG00000243725	TTC4	chr1:54722799:54728346:clu_27650_?:ENSG00000243725	G	A	-54	0.125	23	24	5.74443e-07	-0.887126	0.164473	8.08969e-09	0.0209791	1.50075e-05
1	54716877	1:54716877:C:T	ENSG00000243725	TTC4	chr1:54722799:54728346:clu_27650_?:ENSG00000243725	T	C	1016	0.130208	24	25	8.32468e-07	-0.872654	0.164506	8.08969e-09	0.0209791	1.50075e-05
1	54716905	1:54716905:G:A	ENSG00000243725	TTC4	chr1:54722799:54728346:clu_27650_?:ENSG00000243725	A	G	1044	0.130208	24	25	8.32468e-07	-0.872654	0.164506	8.08969e-09	0.0209791	1.50075e-05
1	54717459	1:54717459:A:G	ENSG00000243725	TTC4	chr1:54722799:54728346:clu_27650_?:ENSG00000243725	G	A	1598	0.125	23	24	2.00364e-07	-0.919613	0.162962	8.08969e-09	0.0209791	1.50075e-05
1	54717855	1:54717855:C:G	ENSG00000243725	TTC4	chr1:54722799:54728346:clu_27650_?:ENSG00000243725	G	C	1994	0.125	23	24	2.00364e-07	-0.919613	0.162962	8.08969e-09	0.0209791	1.50075e-05
1	54718137	1:54718137:T:C	ENSG00000243725	TTC4	chr1:54722799:54728346:clu_27650_?:ENSG00000243725	C	T	2276	0.0572917	11	11	1.40903e-06	-1.25455	0.242322	8.08969e-09	0.0209791	1.50075e-05
1	54718613	1:54718613:C:T	ENSG00000243725	TTC4	chr1:54722799:54728346:clu_27650_?:ENSG00000243725	T	C	2752	0.125	23	24	2.00364e-07	-0.919613	0.162962	8.08969e-09	0.0209791	1.50075e-05
1	54718787	1:54718787:A:T	ENSG00000243725	TTC4	chr1:54722799:54728346:clu_27650_?:ENSG00000243725	T	A	2926	0.125	23	24	2.00364e-07	-0.919613	0.162962	8.08969e-09	0.0209791	1.50075e-05
1	54718788	1:54718789:A:G	ENSG00000243725	TTC4	chr1:54722799:54728346:clu_27650_?:ENSG00000243725	G	A	2927	0.0729167	13	14	2.25552e-08	-1.19373	0.19421	8.08969e-09	0.0209791	1.50075e-05
1	54718896	1:54718896:T:G	ENSG00000243725	TTC4	chr1:54722799:54728346:clu_27650_?:ENSG00000243725	G	T	3035	0.125	23	24	2.00364e-07	-0.919613	0.162962	8.08969e-09	0.0209791	1.50075e-05
1	54718954	1:54718954:G:T	ENSG00000243725	TTC4	chr1:54722799:54728346:clu_27650_?:ENSG00000243725	T	G	3093	0.125	23	24	2.00364e-07	-0.919613	0.162962	8.08969e-09	0.0209791	1.50075e-05
1	54719116	1:54719116:T:C	ENSG00000243725	TTC4	chr1:54722799:54728346:clu_27650_?:ENSG00000243725	C	T	3255	0.125	23	24	2.00364e-07	-0.919613	0.162962	8.08969e-09	0.0209791	1.50075e-05
1	54719531	1:54719531:C:A	ENSG00000243725	TTC4	chr1:54722799:54728346:clu_27650_?:ENSG00000243725	A	C	3670	0.125	23	24	2.00364e-07	-0.919613	0.162962	8.08969e-09	0.0209791	1.50075e-05
1	54719794	1:54719794:G:A	ENSG00000243725	TTC4	chr1:54722799:54728346:clu_27650_?:ENSG00000243725	A	G	3933	0.125	23	24	2.00364e-07	-0.919613	0.162962	8.08969e-09	0.0209791	1.50075e-05
1	54719959	1:54719959:T:C	ENSG00000243725	TTC4	chr1:54722799:54728346:clu_27650_?:ENSG00000243725	C	T	4098	0.125	23	24	2.00364e-07	-0.919613	0.162962	8.08969e-09	0.0209791	1.50075e-05
1	54719971	1:54719971:A:T	ENSG00000243725	TTC4	chr1:54722799:54728346:clu_27650_?:ENSG00000243725	T	A	4110	0.125	23	24	2.00364e-07	-0.919613	0.162962	8.08969e-09	0.0209791	1.50075e-05
1	54720025	1:54720025:A:C	ENSG00000243725	TTC4	chr1:54722799:54728346:clu_27650_?:ENSG00000243725	C	A	4164	0.125	23	24	2.00364e-07	-0.919613	0.162962	8.08969e-09	0.0209791	1.50075e-05
1	54720452	1:54720452:T:A	ENSG00000243725	TTC4	chr1:54722799:54728346:clu_27650_?:ENSG00000243725	A	T	4591	0.125	23	24	2.00364e-07	-0.919613	0.162962	8.08969e-09	0.0209791	1.50075e-05
1	54720942	1:54720942:C:T	ENSG00000243725	TTC4	chr1:54722799:54728346:clu_27650_?:ENSG00000243725	T	C	5081	0.125	23	24	2.00364e-07	-0.919613	0.162962	8.08969e-09	0.0209791	1.50075e-05
1	54721013	1:54721013:G:A	ENSG00000243725	TTC4	chr1:54722799:54728346:clu_27650_?:ENSG00000243725	A	G	5152	0.125	23	24	2.00364e-07	-0.919613	0.162962	8.08969e-09	0.0209791	1.50075e-05
1	54721252	1:54721252:G:A	ENSG00000243725	TTC4	chr1:54722799:54728346:clu_27650_?:ENSG00000243725	A	G	5391	0.125	23	24	2.00364e-07	-0.919613	0.162962	8.08969e-09	0.0209791	1.50075e-05
1	54721493	1:54721493:C:T	ENSG00000243725	TTC4	chr1:54722799:54728346:clu_27650_?:ENSG00000243725	T	C	5632	0.0572917	11	11	1.40903e-06	-1.25455	0.242322	8.08969e-09	0.0209791	1.50075e-05
1	54721494	1:54721494:C:G	ENSG00000243725	TTC4	chr1:54722799:54728346:clu_27650_?:ENSG00000243725	G	C	5633	0.125	23	24	2.00364e-07	-0.919613	0.162962	8.08969e-09	0.0209791	1.50075e-05
1	54721829	1:54721829:A:C	ENSG00000243725	TTC4	chr1:54722799:54728346:clu_27650_?:ENSG00000243725	C	A	5968	0.125	23	24	2.00364e-07	-0.919613	0.162962	8.08969e-09	0.0209791	1.50075e-05
1	54722349	1:54722349:C:G	ENSG00000243725	TTC4	chr1:54722799:54728346:clu_27650_?:ENSG00000243725	G	C	6488	0.125	23	24	2.00364e-07	-0.919613	0.162962	8.08969e-09	0.0209791	1.50075e-05
1	54722516	1:54722516:G:A	ENSG00000243725	TTC4	chr1:54722799:54728346:clu_27650_?:ENSG00000243725	A	G	6655	0.125	23	24	2.00364e-07	-0.919613	0.162962	8.08969e-09	0.0209791	1.50075e-05
1	54722596	1:54722596:G:A	ENSG00000243725	TTC4	chr1:54722799:54728346:clu_27650_?:ENSG00000243725	A	G	6735	0.125	23	24	2.00364e-07	-0.919613	0.162962	8.08969e-09	0.0209791	1.50075e-05
1	54722709	1:54722709:C:T	ENSG00000243725	TTC4	chr1:54722799:54728346:clu_27650_?:ENSG00000243725	T	C	6848	0.125	23	24	2.00364e-07	-0.919613	0.162962	8.08969e-09	0.0209791	1.50075e-05
1	54723169	1:54723169:G:T	ENSG00000243725	TTC4	chr1:54722799:54728346:clu_27650_?:ENSG00000243725	T	G	7308	0.125	23	24	2.00364e-07	-0.919613	0.162962	8.08969e-09	0.0209791	1.50075e-05
1	54723205	1:54723205:T:C	ENSG00000243725	TTC4	chr1:54722799:54728346:clu_27650_?:ENSG00000243725	C	T	7344	0.135417	25	26	1.57984e-06	-0.849268	0.164929	8.08969e-09	0.0209791	1.50075e-05
1	54723268	1:54723268:G:T	ENSG00000243725	TTC4	chr1:54722799:54728346:clu_27650_?:ENSG00000243725	T	G	7407	0.125	23	24	2.00364e-07	-0.919613	0.162962	8.08969e-09	0.0209791	1.50075e-05
1	54723347	1:54723347:C:T	ENSG00000243725	TTC4	chr1:54722799:54728346:clu_27650_?:ENSG00000243725	T	C	7486	0.125	23	24	2.00364e-07	-0.919613	0.162962	8.08969e-09	0.0209791	1.50075e-05
1	54723512	1:54723512:G:A	ENSG00000243725	TTC4	chr1:54722799:54728346:clu_27650_?:ENSG00000243725	A	G	7651	0.125	23	24	2.00364e-07	-0.919613	0.162962	8.08969e-09	0.0209791	1.50075e-05
1	54723550	1:54723550:A:G	ENSG00000243725	TTC4	chr1:54722799:54728346:clu_27650_?:ENSG00000243725	G	A	7689	0.125	23	24	2.00364e-07	-0.919613	0.162962	8.08969e-09	0.0209791	1.50075e-05
1	54723735	1:54723735:G:T	ENSG00000243725	TTC4	chr1:54722799:54728346:clu_27650_?:ENSG00000243725	T	G	7874	0.125	23	24	2.00364e-07	-0.919613	0.162962	8.08969e-09	0.0209791	1.50075e-05
1	54723826	1:54723826:T:C	ENSG00000243725	TTC4	chr1:54722799:54728346:clu_27650_?:ENSG00000243725	C	T	7965	0.0729167	13	14	2.25552e-08	-1.19373	0.19421	8.08969e-09	0.0209791	1.50075e-05
1	54724125	1:54724125:G:T	ENSG00000243725	TTC4	chr1:54722799:54728346:clu_27650_?:ENSG00000243725	T	G	8264	0.151042	28	29	6.90254e-06	-0.806832	0.168699	8.08969e-09	0.0209791	1.50075e-05
1	54724574	1:54724574:C:T	ENSG00000243725	TTC4	chr1:54722799:54728346:clu_27650_?:ENSG00000243725	T	C	8713	0.125	23	24	2.00364e-07	-0.919613	0.162962	8.08969e-09	0.0209791	1.50075e-05
1	54724865	1:54724865:C:G	ENSG00000243725	TTC4	chr1:54722799:54728346:clu_27650_?:ENSG00000243725	G	C	9004	0.151042	28	29	6.90254e-06	-0.806832	0.168699	8.08969e-09	0.0209791	1.50075e-05
1	54725728	1:54725728:A:G	ENSG00000243725	TTC4	chr1:54721240:54722675:clu_27649_?:ENSG00000243725	G	A	9867	0.161458	29	31	4.29124e-07	-0.860667	0.157537	8.08969e-09	0.0209791	1.50075e-05
1	54726767	1:54726767:C:T	ENSG00000243725	TTC4	chr1:54722799:54728346:clu_27650_?:ENSG00000243725	T	C	10906	0.125	23	24	2.00364e-07	-0.919613	0.162962	8.08969e-09	0.0209791	1.50075e-05
1	54727074	1:54727074:A:G	ENSG00000243725	TTC4	chr1:54722799:54728346:clu_27650_?:ENSG00000243725	G	A	11213	0.151042	28	29	6.90254e-06	-0.806832	0.168699	8.08969e-09	0.0209791	1.50075e-05
1	54727112	1:54727112:G:A	ENSG00000243725	TTC4	chr1:54722799:54728346:clu_27650_?:ENSG00000243725	A	G	11251	0.151042	28	29	6.90254e-06	-0.806832	0.168699	8.08969e-09	0.0209791	1.50075e-05
1	54727649	1:54727649:C:T	ENSG00000243725	TTC4	chr1:54722799:54728346:clu_27650_?:ENSG00000243725	T	C	11788	0.0833333	15	16	3.37707e-07	-1.07751	0.195198	8.08969e-09	0.0209791	1.50075e-05
1	54727736	1:54727736:C:T	ENSG00000243725	TTC4	chr1:54722799:54728346:clu_27650_?:ENSG00000243725	T	C	11875	0.151042	28	29	6.90254e-06	-0.806832	0.168699	8.08969e-09	0.0209791	1.50075e-05
1	54728016	1:54728016:A:G	ENSG00000243725	TTC4	chr1:54722799:54728346:clu_27650_?:ENSG00000243725	G	A	12155	0.151042	28	29	6.90254e-06	-0.806832	0.168699	8.08969e-09	0.0209791	1.50075e-05
1	54728023	1:54728023:G:A	ENSG00000243725	TTC4	chr1:54722799:54728346:clu_27650_?:ENSG00000243725	A	G	12162	0.151042	28	29	6.90254e-06	-0.806832	0.168699	8.08969e-09	0.0209791	1.50075e-05
1	54728041	1:54728041:G:C	ENSG00000243725	TTC4	chr1:54722799:54728346:clu_27650_?:ENSG00000243725	C	G	12180	0.151042	28	29	6.90254e-06	-0.806832	0.168699	8.08969e-09	0.0209791	1.50075e-05
1	54728043	1:54728043:C:G	ENSG00000243725	TTC4	chr1:54722799:54728346:clu_27650_?:ENSG00000243725	G	C	12182	0.0729167	13	14	2.25552e-08	-1.19373	0.19421	8.08969e-09	0.0209791	1.50075e-05
1	54728620	1:54728620:A:G	ENSG00000243725	TTC4	chr1:54722799:54728346:clu_27650_?:ENSG00000243725	G	A	12759	0.151042	28	29	6.90254e-06	-0.806832	0.168699	8.08969e-09	0.0209791	1.50075e-05
1	54728682	1:54728682:T:C	ENSG00000243725	TTC4	chr1:54722799:54728346:clu_27650_?:ENSG00000243725	C	T	12821	0.151042	28	29	6.90254e-06	-0.806832	0.168699	8.08969e-09	0.0209791	1.50075e-05
1	54728851	1:54728851:T:C	ENSG00000243725	TTC4	chr1:54722799:54728346:clu_27650_?:ENSG00000243725	C	T	12990	0.15625	29	30	1.36565e-05	-0.771721	0.16747	8.08969e-09	0.0209791	1.50075e-05
1	54729198	1:54729198:C:T	ENSG00000243725	TTC4	chr1:54722799:54728346:clu_27650_?:ENSG00000243725	T	C	13337	0.151042	28	29	6.90254e-06	-0.806832	0.168699	8.08969e-09	0.0209791	1.50075e-05
1	54729308	1:54729308:T:A	ENSG00000243725	TTC4	chr1:54722799:54728346:clu_27650_?:ENSG00000243725	A	T	13447	0.151042	28	29	6.90254e-06	-0.806832	0.168699	8.08969e-09	0.0209791	1.50075e-05
1	54729675	1:54729675:A:C	ENSG00000243725	TTC4	chr1:54722799:54728346:clu_27650_?:ENSG00000243725	C	A	13814	0.151042	28	29	6.90254e-06	-0.806832	0.168699	8.08969e-09	0.0209791	1.50075e-05
1	54730001	1:54730001:G:A	ENSG00000243725	TTC4	chr1:54722799:54728346:clu_27650_?:ENSG00000243725	A	G	14140	0.151042	28	29	6.90254e-06	-0.806832	0.168699	8.08969e-09	0.0209791	1.50075e-05
1	54730024	1:54730024:G:A	ENSG00000243725	TTC4	chr1:54722799:54728346:clu_27650_?:ENSG00000243725	A	G	14163	0.151042	28	29	6.90254e-06	-0.806832	0.168699	8.08969e-09	0.0209791	1.50075e-05
1	54730027	1:54730027:G:T	ENSG00000243725	TTC4	chr1:54722799:54728346:clu_27650_?:ENSG00000243725	T	G	14166	0.151042	28	29	6.90254e-06	-0.806832	0.168699	8.08969e-09	0.0209791	1.50075e-05
1	54730155	1:54730155:T:C	ENSG00000243725	TTC4	chr1:54722799:54728346:clu_27650_?:ENSG00000243725	C	T	14294	0.151042	28	29	6.90254e-06	-0.806832	0.168699	8.08969e-09	0.0209791	1.50075e-05
1	54730235	1:54730235:T:A	ENSG00000243725	TTC4	chr1:54722799:54728346:clu_27650_?:ENSG00000243725	A	T	14374	0.151042	28	29	6.90254e-06	-0.806832	0.168699	8.08969e-09	0.0209791	1.50075e-05
1	54730247	1:54730247:A:G	ENSG00000243725	TTC4	chr1:54722799:54728346:clu_27650_?:ENSG00000243725	G	A	14386	0.151042	28	29	6.90254e-06	-0.806832	0.168699	8.08969e-09	0.0209791	1.50075e-05
1	54730342	1:54730342:A:C	ENSG00000243725	TTC4	chr1:54722799:54728346:clu_27650_?:ENSG00000243725	C	A	14481	0.151042	28	29	6.90254e-06	-0.806832	0.168699	8.08969e-09	0.0209791	1.50075e-05
1	54731066	1:54731066:G:A	ENSG00000243725	TTC4	chr1:54722799:54728346:clu_27650_?:ENSG00000243725	A	G	15205	0.151042	28	29	6.90254e-06	-0.806832	0.168699	8.08969e-09	0.0209791	1.50075e-05
1	54732046	1:54732046:T:G	ENSG00000243725	TTC4	chr1:54722799:54728346:clu_27650_?:ENSG00000243725	G	T	16185	0.151042	28	29	6.90254e-06	-0.806832	0.168699	8.08969e-09	0.0209791	1.50075e-05
1	54732393	1:54732393:G:C	ENSG00000243725	TTC4	chr1:54722799:54728346:clu_27650_?:ENSG00000243725	C	G	16532	0.151042	28	29	6.90254e-06	-0.806832	0.168699	8.08969e-09	0.0209791	1.50075e-05
1	54732448	1:54732448:G:A	ENSG00000243725	TTC4	chr1:54722799:54728346:clu_27650_?:ENSG00000243725	A	G	16587	0.151042	28	29	6.90254e-06	-0.806832	0.168699	8.08969e-09	0.0209791	1.50075e-05
1	54732568	1:54732568:C:T	ENSG00000243725	TTC4	chr1:54722799:54728346:clu_27650_?:ENSG00000243725	T	C	16707	0.0729167	13	14	2.25552e-08	-1.19373	0.19421	8.08969e-09	0.0209791	1.50075e-05
1	54732660	1:54732660:A:G	ENSG00000243725	TTC4	chr1:54722799:54728346:clu_27650_?:ENSG00000243725	G	A	16799	0.151042	28	29	6.90254e-06	-0.806832	0.168699	8.08969e-09	0.0209791	1.50075e-05
1	54732694	1:54732694:G:A	ENSG00000243725	TTC4	chr1:54722799:54728346:clu_27650_?:ENSG00000243725	A	G	16833	0.151042	28	29	6.90254e-06	-0.806832	0.168699	8.08969e-09	0.0209791	1.50075e-05
1	54732777	1:54732777:T:C	ENSG00000243725	TTC4	chr1:54722799:54728346:clu_27650_?:ENSG00000243725	C	T	16916	0.151042	28	29	6.90254e-06	-0.806832	0.168699	8.08969e-09	0.0209791	1.50075e-05
1	54732778	1:54732778:T:C	ENSG00000243725	TTC4	chr1:54722799:54728346:clu_27650_?:ENSG00000243725	C	T	16917	0.151042	28	29	6.90254e-06	-0.806832	0.168699	8.08969e-09	0.0209791	1.50075e-05
1	54732813	1:54732813:T:C	ENSG00000243725	TTC4	chr1:54722799:54728346:clu_27650_?:ENSG00000243725	C	T	16952	0.151042	28	29	6.90254e-06	-0.806832	0.168699	8.08969e-09	0.0209791	1.50075e-05
1	54733247	1:54733247:A:G	ENSG00000243725	TTC4	chr1:54722799:54728346:clu_27650_?:ENSG00000243725	G	A	17386	0.151042	28	29	6.90254e-06	-0.806832	0.168699	8.08969e-09	0.0209791	1.50075e-05
1	54733426	1:54733426:A:T	ENSG00000243725	TTC4	chr1:54722799:54728346:clu_27650_?:ENSG00000243725	T	A	17565	0.0729167	13	14	2.25552e-08	-1.19373	0.19421	8.08969e-09	0.0209791	1.50075e-05
1	54733814	1:54733814:T:G	ENSG00000243725	TTC4	chr1:54722799:54728346:clu_27650_?:ENSG00000243725	G	T	17953	0.0729167	13	14	2.25552e-08	-1.19373	0.19421	8.08969e-09	0.0209791	1.50075e-05
1	54734080	1:54734080:T:A	ENSG00000243725	TTC4	chr1:54722799:54728346:clu_27650_?:ENSG00000243725	A	T	18219	0.151042	28	29	6.90254e-06	-0.806832	0.168699	8.08969e-09	0.0209791	1.50075e-05
1	54734081	1:54734081:T:A	ENSG00000243725	TTC4	chr1:54722799:54728346:clu_27650_?:ENSG00000243725	A	T	18220	0.151042	28	29	6.90254e-06	-0.806832	0.168699	8.08969e-09	0.0209791	1.50075e-05
1	54734212	1:54734212:T:C	ENSG00000243725	TTC4	chr1:54722799:54728346:clu_27650_?:ENSG00000243725	C	T	18351	0.151042	28	29	6.90254e-06	-0.806832	0.168699	8.08969e-09	0.0209791	1.50075e-05
1	54734325	1:54734325:G:A	ENSG00000243725	TTC4	chr1:54722799:54728346:clu_27650_?:ENSG00000243725	A	G	18464	0.0729167	13	14	2.25552e-08	-1.19373	0.19421	8.08969e-09	0.0209791	1.50075e-05
1	54734347	1:54734347:T:C	ENSG00000243725	TTC4	chr1:54722799:54728346:clu_27650_?:ENSG00000243725	C	T	18486	0.151042	28	29	6.90254e-06	-0.806832	0.168699	8.08969e-09	0.0209791	1.50075e-05
1	54734363	1:54734363:T:C	ENSG00000243725	TTC4	chr1:54722799:54728346:clu_27650_?:ENSG00000243725	C	T	18502	0.151042	28	29	6.90254e-06	-0.806832	0.168699	8.08969e-09	0.0209791	1.50075e-05
1	54734535	1:54734535:T:C	ENSG00000243725	TTC4	chr1:54722799:54728346:clu_27650_?:ENSG00000243725	C	T	18674	0.151042	28	29	6.90254e-06	-0.806832	0.168699	8.08969e-09	0.0209791	1.50075e-05
1	54735125	1:54735125:G:T	ENSG00000243725	TTC4	chr1:54722799:54728346:clu_27650_?:ENSG00000243725	T	G	19264	0.151042	28	29	6.90254e-06	-0.806832	0.168699	8.08969e-09	0.0209791	1.50075e-05
1	54735127	1:54735127:C:T	ENSG00000243725	TTC4	chr1:54722799:54728346:clu_27650_?:ENSG00000243725	T	C	19266	0.151042	28	29	6.90254e-06	-0.806832	0.168699	8.08969e-09	0.0209791	1.50075e-05
1	54735310	1:54735310:C:T	ENSG00000243725	TTC4	chr1:54722799:54728346:clu_27650_?:ENSG00000243725	T	C	19449	0.151042	28	29	6.90254e-06	-0.806832	0.168699	8.08969e-09	0.0209791	1.50075e-05
1	54735370	1:54735370:A:C	ENSG00000243725	TTC4	chr1:54722799:54728346:clu_27650_?:ENSG00000243725	C	A	19509	0.151042	28	29	6.90254e-06	-0.806832	0.168699	8.08969e-09	0.0209791	1.50075e-05
1	54736400	1:54736400:A:G	ENSG00000243725	TTC4	chr1:54722799:54728346:clu_27650_?:ENSG00000243725	G	A	20539	0.145833	27	28	1.24377e-05	-0.802974	0.173344	8.08969e-09	0.0209791	1.50075e-05
1	54736474	1:54736474:A:G	ENSG00000243725	TTC4	chr1:54722799:54728346:clu_27650_?:ENSG00000243725	G	A	20613	0.151042	28	29	6.90254e-06	-0.806832	0.168699	8.08969e-09	0.0209791	1.50075e-05
1	54736561	1:54736561:A:G	ENSG00000243725	TTC4	chr1:54722799:54728346:clu_27650_?:ENSG00000243725	G	A	20700	0.151042	28	29	6.90254e-06	-0.806832	0.168699	8.08969e-09	0.0209791	1.50075e-05
1	54736972	1:54736972:C:G	ENSG00000243725	TTC4	chr1:54722799:54728346:clu_27650_?:ENSG00000243725	G	C	21111	0.151042	28	29	6.90254e-06	-0.806832	0.168699	8.08969e-09	0.0209791	1.50075e-05
1	54737117	1:54737117:G:A	ENSG00000243725	TTC4	chr1:54722799:54728346:clu_27650_?:ENSG00000243725	A	G	21256	0.151042	28	29	6.90254e-06	-0.806832	0.168699	8.08969e-09	0.0209791	1.50075e-05
1	54737201	1:54737201:T:C	ENSG00000243725	TTC4	chr1:54722799:54728346:clu_27650_?:ENSG00000243725	C	T	21340	0.151042	28	29	6.90254e-06	-0.806832	0.168699	8.08969e-09	0.0209791	1.50075e-05
1	54737462	1:54737462:A:G	ENSG00000243725	TTC4	chr1:54722799:54728346:clu_27650_?:ENSG00000243725	G	A	21601	0.151042	28	29	6.90254e-06	-0.806832	0.168699	8.08969e-09	0.0209791	1.50075e-05
1	54737483	1:54737483:A:G	ENSG00000243725	TTC4	chr1:54722799:54728346:clu_27650_?:ENSG00000243725	G	A	21622	0.151042	28	29	6.90254e-06	-0.806832	0.168699	8.08969e-09	0.0209791	1.50075e-05
1	54737757	1:54737757:T:G	ENSG00000243725	TTC4	chr1:54722799:54728346:clu_27650_?:ENSG00000243725	G	T	21896	0.151042	28	29	6.90254e-06	-0.806832	0.168699	8.08969e-09	0.0209791	1.50075e-05
1	54737760	1:54737760:G:A	ENSG00000243725	TTC4	chr1:54722799:54728346:clu_27650_?:ENSG00000243725	A	G	21899	0.151042	28	29	6.90254e-06	-0.806832	0.168699	8.08969e-09	0.0209791	1.50075e-05
1	54737871	1:54737871:G:A	ENSG00000243725	TTC4	chr1:54722799:54728346:clu_27650_?:ENSG00000243725	A	G	22010	0.0729167	13	14	2.25552e-08	-1.19373	0.19421	8.08969e-09	0.0209791	1.50075e-05
1	54737957	1:54737957:A:G	ENSG00000243725	TTC4	chr1:54722799:54728346:clu_27650_?:ENSG00000243725	G	A	22096	0.151042	28	29	6.90254e-06	-0.806832	0.168699	8.08969e-09	0.0209791	1.50075e-05
1	54738992	1:54738992:A:G	ENSG00000243725	TTC4	chr1:54722799:54728346:clu_27650_?:ENSG00000243725	G	A	23131	0.0729167	13	14	2.25552e-08	-1.19373	0.19421	8.08969e-09	0.0209791	1.50075e-05
1	54739684	1:54739684:C:A	ENSG00000243725	TTC4	chr1:54722799:54728346:clu_27650_?:ENSG00000243725	A	C	23823	0.151042	28	29	6.90254e-06	-0.806832	0.168699	8.08969e-09	0.0209791	1.50075e-05
1	54740029	1:54740029:C:T	ENSG00000243725	TTC4	chr1:54722799:54728346:clu_27650_?:ENSG00000243725	T	C	24168	0.151042	28	29	6.90254e-06	-0.806832	0.168699	8.08969e-09	0.0209791	1.50075e-05
1	54740168	1:54740168:C:A	ENSG00000243725	TTC4	chr1:54722799:54728346:clu_27650_?:ENSG00000243725	A	C	24307	0.151042	28	29	6.90254e-06	-0.806832	0.168699	8.08969e-09	0.0209791	1.50075e-05
1	54741157	1:54741157:T:A	ENSG00000243725	TTC4	chr1:54722799:54728346:clu_27650_?:ENSG00000243725	A	T	25296	0.0729167	13	14	2.25552e-08	-1.19373	0.19421	8.08969e-09	0.0209791	1.50075e-05
1	54741379	1:54741379:T:C	ENSG00000243725	TTC4	chr1:54722799:54728346:clu_27650_?:ENSG00000243725	C	T	25518	0.0729167	13	14	2.25552e-08	-1.19373	0.19421	8.08969e-09	0.0209791	1.50075e-05
1	54741543	1:54741543:T:C	ENSG00000243725	TTC4	chr1:54722799:54728346:clu_27650_?:ENSG00000243725	C	T	25682	0.151042	28	29	6.90254e-06	-0.806832	0.168699	8.08969e-09	0.0209791	1.50075e-05
1	54741865	1:54741865:G:A	ENSG00000243725	TTC4	chr1:54722799:54728346:clu_27650_?:ENSG00000243725	A	G	26004	0.151042	28	29	6.90254e-06	-0.806832	0.168699	8.08969e-09	0.0209791	1.50075e-05
1	54742245	1:54742245:C:T	ENSG00000243725	TTC4	chr1:54722799:54728346:clu_27650_?:ENSG00000243725	T	C	26384	0.151042	28	29	6.90254e-06	-0.806832	0.168699	8.08969e-09	0.0209791	1.50075e-05
1	54742310	1:54742310:T:C	ENSG00000243725	TTC4	chr1:54722799:54728346:clu_27650_?:ENSG00000243725	C	T	26449	0.151042	28	29	6.90254e-06	-0.806832	0.168699	8.08969e-09	0.0209791	1.50075e-05
1	54742311	1:54742311:T:C	ENSG00000243725	TTC4	chr1:54722799:54728346:clu_27650_?:ENSG00000243725	C	T	26450	0.151042	28	29	6.90254e-06	-0.806832	0.168699	8.08969e-09	0.0209791	1.50075e-05
1	54742531	1:54742531:C:T	ENSG00000243725	TTC4	chr1:54722799:54728346:clu_27650_?:ENSG00000243725	T	C	26670	0.151042	28	29	6.90254e-06	-0.806832	0.168699	8.08969e-09	0.0209791	1.50075e-05
1	54742821	1:54742821:T:C	ENSG00000243725	TTC4	chr1:54722799:54728346:clu_27650_?:ENSG00000243725	C	T	26960	0.151042	28	29	6.90254e-06	-0.806832	0.168699	8.08969e-09	0.0209791	1.50075e-05
1	54742996	1:54742996:G:A	ENSG00000243725	TTC4	chr1:54722799:54728346:clu_27650_?:ENSG00000243725	A	G	27135	0.151042	28	29	6.90254e-06	-0.806832	0.168699	8.08969e-09	0.0209791	1.50075e-05
1	61688874	1:61688874:A:G	ENSG00000132849	PATJ	chr1:61797428:61801623:clu_27684_?:ENSG00000132849	A	G	-53551	0.947917	9	10	3.95338e-06	0.956713	0.194342	3.19942e-16	4.70575e-08	5.55726e-06
1	61689596	1:61689596:T:C	ENSG00000132849	PATJ	chr1:61797428:61801623:clu_27684_?:ENSG00000132849	T	C	-52829	0.947917	9	10	3.95338e-06	0.956713	0.194342	3.19942e-16	4.70575e-08	5.55726e-06
1	61691119	1:61691119:C:T	ENSG00000132849	PATJ	chr1:61797428:61801623:clu_27684_?:ENSG00000132849	C	T	-51306	0.947917	9	10	3.95338e-06	0.956713	0.194342	3.19942e-16	4.70575e-08	5.55726e-06
1	61694870	1:61694870:A:G	ENSG00000132849	PATJ	chr1:61797428:61801623:clu_27684_?:ENSG00000132849	A	G	-47555	0.947917	9	10	3.95338e-06	0.956713	0.194342	3.19942e-16	4.70575e-08	5.55726e-06
1	61702936	1:61702936:C:T	ENSG00000132849	PATJ	chr1:61797428:61801623:clu_27684_?:ENSG00000132849	C	T	-39489	0.947917	9	10	3.95338e-06	0.956713	0.194342	3.19942e-16	4.70575e-08	5.55726e-06
1	61706536	1:61706536:C:T	ENSG00000132849	PATJ	chr1:61797428:61801623:clu_27684_?:ENSG00000132849	T	C	-35889	0.0520833	9	10	3.95338e-06	-0.956713	0.194342	3.19942e-16	4.70575e-08	5.55726e-06
1	61707179	1:61707179:A:T	ENSG00000132849	PATJ	chr1:61797428:61801623:clu_27684_?:ENSG00000132849	A	T	-35246	0.947917	9	10	3.95338e-06	0.956713	0.194342	3.19942e-16	4.70575e-08	5.55726e-06
1	61711109	1:61711109:A:G	ENSG00000132849	PATJ	chr1:61797428:61801623:clu_27684_?:ENSG00000132849	A	G	-31316	0.947917	9	10	3.95338e-06	0.956713	0.194342	3.19942e-16	4.70575e-08	5.55726e-06
1	61712912	1:61712912:A:G	ENSG00000132849	PATJ	chr1:61797428:61801623:clu_27684_?:ENSG00000132849	A	G	-29513	0.947917	9	10	3.95338e-06	0.956713	0.194342	3.19942e-16	4.70575e-08	5.55726e-06
1	61717074	1:61717074:T:C	ENSG00000132849	PATJ	chr1:61797428:61801623:clu_27684_?:ENSG00000132849	T	C	-25351	0.947917	9	10	3.95338e-06	0.956713	0.194342	3.19942e-16	4.70575e-08	5.55726e-06
1	61720447	1:61720447:T:G	ENSG00000132849	PATJ	chr1:61797428:61801623:clu_27684_?:ENSG00000132849	T	G	-21978	0.947917	9	10	3.95338e-06	0.956713	0.194342	3.19942e-16	4.70575e-08	5.55726e-06
1	61721419	1:61721419:A:G	ENSG00000132849	PATJ	chr1:61797428:61801623:clu_27684_?:ENSG00000132849	A	G	-21006	0.947917	9	10	3.95338e-06	0.956713	0.194342	3.19942e-16	4.70575e-08	5.55726e-06
1	61722155	1:61722155:G:A	ENSG00000132849	PATJ	chr1:61797428:61801623:clu_27684_?:ENSG00000132849	A	G	-20270	0.0520833	9	10	3.95338e-06	-0.956713	0.194342	3.19942e-16	4.70575e-08	5.55726e-06
1	61730696	1:61730696:G:A	ENSG00000132849	PATJ	chr1:61797428:61801623:clu_27684_?:ENSG00000132849	G	A	-11729	0.947917	9	10	3.95338e-06	0.956713	0.194342	3.19942e-16	4.70575e-08	5.55726e-06
1	61733140	1:61733140:A:G	ENSG00000132849	PATJ	chr1:61797428:61801623:clu_27684_?:ENSG00000132849	A	G	-9285	0.947917	9	10	3.95338e-06	0.956713	0.194342	3.19942e-16	4.70575e-08	5.55726e-06
1	61737056	1:61737056:A:C	ENSG00000132849	PATJ	chr1:61797428:61801623:clu_27684_?:ENSG00000132849	A	C	-5369	0.942708	10	11	3.10452e-08	1.0701	0.176178	3.19942e-16	4.70575e-08	5.55726e-06
1	61782012	1:61782012:G:A	ENSG00000132849	PATJ	chr1:61797428:61801623:clu_27684_?:ENSG00000132849	A	G	39587	0.119792	19	23	1.82843e-13	-0.94475	0.108782	3.19942e-16	4.70575e-08	5.55726e-06
1	61783624	1:61783624:G:T	ENSG00000132849	PATJ	chr1:61797428:61801623:clu_27684_?:ENSG00000132849	T	G	41199	0.0885417	15	17	3.19942e-16	-1.20653	0.120357	3.19942e-16	4.70575e-08	5.55726e-06
1	61784337	1:61784337:C:T	ENSG00000132849	PATJ	chr1:61797428:61801623:clu_27684_?:ENSG00000132849	T	C	41912	0.0885417	15	17	3.19942e-16	-1.20653	0.120357	3.19942e-16	4.70575e-08	5.55726e-06
1	61788290	1:61788290:C:T	ENSG00000132849	PATJ	chr1:61797428:61801623:clu_27684_?:ENSG00000132849	T	C	45865	0.0885417	15	17	3.19942e-16	-1.20653	0.120357	3.19942e-16	4.70575e-08	5.55726e-06
1	61789311	1:61789311:T:A	ENSG00000132849	PATJ	chr1:61797428:61801623:clu_27684_?:ENSG00000132849	A	T	46886	0.078125	13	15	3.48324e-09	-0.98083	0.149385	3.19942e-16	4.70575e-08	5.55726e-06
1	61799337	1:61799337:C:T	ENSG00000132849	PATJ	chr1:61797428:61801623:clu_27684_?:ENSG00000132849	T	C	56912	0.09375	16	18	4.51476e-15	-1.14158	0.120605	3.19942e-16	4.70575e-08	5.55726e-06
1	61802149	1:61802149:G:A	ENSG00000132849	PATJ	chr1:61797428:61801623:clu_27684_?:ENSG00000132849	A	G	59724	0.0885417	15	17	3.19942e-16	-1.20653	0.120357	3.19942e-16	4.70575e-08	5.55726e-06
1	61804708	1:61804708:C:T	ENSG00000132849	PATJ	chr1:61797428:61801623:clu_27684_?:ENSG00000132849	T	C	62283	0.0885417	15	17	3.19942e-16	-1.20653	0.120357	3.19942e-16	4.70575e-08	5.55726e-06
1	61809391	1:61809391:T:C	ENSG00000132849	PATJ	chr1:61797428:61801623:clu_27684_?:ENSG00000132849	C	T	66966	0.0885417	15	17	3.19942e-16	-1.20653	0.120357	3.19942e-16	4.70575e-08	5.55726e-06
1	61810241	1:61810241:G:A	ENSG00000132849	PATJ	chr1:61797428:61801623:clu_27684_?:ENSG00000132849	A	G	67816	0.0885417	15	17	3.19942e-16	-1.20653	0.120357	3.19942e-16	4.70575e-08	5.55726e-06
1	61810920	1:61810920:G:A	ENSG00000132849	PATJ	chr1:61797428:61801623:clu_27684_?:ENSG00000132849	A	G	68495	0.0833333	15	16	5.96363e-15	-1.28058	0.136133	3.19942e-16	4.70575e-08	5.55726e-06
1	61811850	1:61811850:A:G	ENSG00000132849	PATJ	chr1:61797428:61801623:clu_27684_?:ENSG00000132849	G	A	69425	0.0833333	15	16	5.96363e-15	-1.28058	0.136133	3.19942e-16	4.70575e-08	5.55726e-06
1	61814549	1:61814549:C:T	ENSG00000132849	PATJ	chr1:61797428:61801623:clu_27684_?:ENSG00000132849	T	C	72124	0.171875	30	33	2.96118e-06	-0.64949	0.130035	3.19942e-16	4.70575e-08	5.55726e-06
1	74709980	1:74709980:G:A	ENSG00000162623	TYW3	chr1:74733418:74736542:clu_27789_?:ENSG00000162623	A	G	-23429	0.317708	47	61	8.97595e-12	-1.07168	0.13636	1.91743e-13	2.35488e-07	1.00938e-05
1	74710202	1:74710202:T:C	ENSG00000162623	TYW3	chr1:74733418:74736542:clu_27789_?:ENSG00000162623	C	T	-23207	0.40625	56	78	1.64383e-07	-0.786313	0.138206	1.91743e-13	2.35488e-07	1.00938e-05
1	74713029	1:74713029:C:T	ENSG00000162623	TYW3	chr1:74733418:74736542:clu_27789_?:ENSG00000162623	T	C	-20380	0.260417	39	50	6.10361e-10	-0.990795	0.142573	1.91743e-13	2.35488e-07	1.00938e-05
1	74721766	1:74721766:A:G	ENSG00000162623	TYW3	chr1:74736622:74748751:clu_27790_?:ENSG00000162623	G	A	-11643	0.0625	12	12	2.95823e-06	1.21954	0.244153	1.91743e-13	2.35488e-07	1.00938e-05
1	74722279	1:74722279:A:C	ENSG00000162623	TYW3	chr1:74733418:74736542:clu_27789_?:ENSG00000162623	C	A	-11130	0.338542	49	65	1.60017e-11	-0.981515	0.12688	1.91743e-13	2.35488e-07	1.00938e-05
1	74724412	1:74724412:A:G	ENSG00000162623	TYW3	chr1:74736622:74748751:clu_27790_?:ENSG00000162623	G	A	-8997	0.0625	12	12	2.95823e-06	1.21954	0.244153	1.91743e-13	2.35488e-07	1.00938e-05
1	74724537	1:74724537:A:G	ENSG00000162623	TYW3	chr1:74736622:74748751:clu_27790_?:ENSG00000162623	G	A	-8872	0.0625	12	12	2.95823e-06	1.21954	0.244153	1.91743e-13	2.35488e-07	1.00938e-05
1	74726503	1:74726503:C:T	ENSG00000162623	TYW3	chr1:74733418:74736542:clu_27789_?:ENSG00000162623	T	C	-6906	0.338542	49	65	1.60017e-11	-0.981515	0.12688	1.91743e-13	2.35488e-07	1.00938e-05
1	74727805	1:74727805:C:T	ENSG00000162623	TYW3	chr1:74733418:74736542:clu_27789_?:ENSG00000162623	T	C	-5604	0.260417	39	50	6.10361e-10	-0.990795	0.142573	1.91743e-13	2.35488e-07	1.00938e-05
1	74728351	1:74728351:C:T	ENSG00000162623	TYW3	chr1:74733418:74736542:clu_27789_?:ENSG00000162623	T	C	-5058	0.338542	49	65	1.60017e-11	-0.981515	0.12688	1.91743e-13	2.35488e-07	1.00938e-05
1	74730128	1:74730128:T:C	ENSG00000162623	TYW3	chr1:74733418:74736542:clu_27789_?:ENSG00000162623	C	T	-3281	0.338542	49	65	1.60017e-11	-0.981515	0.12688	1.91743e-13	2.35488e-07	1.00938e-05
1	74730675	1:74730675:A:G	ENSG00000162623	TYW3	chr1:74733418:74736542:clu_27789_?:ENSG00000162623	G	A	-2734	0.338542	49	65	1.60017e-11	-0.981515	0.12688	1.91743e-13	2.35488e-07	1.00938e-05
1	74731849	1:74731849:A:G	ENSG00000162623	TYW3	chr1:74733418:74736542:clu_27789_?:ENSG00000162623	G	A	-1560	0.328125	48	63	1.91744e-13	-1.09609	0.126355	1.91743e-13	2.35488e-07	1.00938e-05
1	74733530	1:74733530:G:A	ENSG00000162623	TYW3	chr1:74733418:74736542:clu_27789_?:ENSG00000162623	A	G	121	0.328125	48	63	1.91744e-13	-1.09609	0.126355	1.91743e-13	2.35488e-07	1.00938e-05
1	74733595	1:74733595:G:A	ENSG00000162623	TYW3	chr1:74733418:74736542:clu_27789_?:ENSG00000162623	A	G	186	0.338542	49	65	1.60017e-11	-0.981515	0.12688	1.91743e-13	2.35488e-07	1.00938e-05
1	74733931	1:74733931:T:C	ENSG00000162623	TYW3	chr1:74733418:74736542:clu_27789_?:ENSG00000162623	C	T	522	0.338542	49	65	1.60017e-11	-0.981515	0.12688	1.91743e-13	2.35488e-07	1.00938e-05
1	74735101	1:74735101:C:A	ENSG00000162623	TYW3	chr1:74733418:74736542:clu_27789_?:ENSG00000162623	A	C	1692	0.328125	48	63	1.91744e-13	-1.09609	0.126355	1.91743e-13	2.35488e-07	1.00938e-05
1	74737694	1:74737694:C:T	ENSG00000162623	TYW3	chr1:74736622:74748751:clu_27790_?:ENSG00000162623	T	C	4285	0.0625	12	12	2.95823e-06	1.21954	0.244153	1.91743e-13	2.35488e-07	1.00938e-05
1	74739830	1:74739830:G:T	ENSG00000162623	TYW3	chr1:74733418:74736542:clu_27789_?:ENSG00000162623	T	G	6421	0.260417	39	50	6.10361e-10	-0.990795	0.142573	1.91743e-13	2.35488e-07	1.00938e-05
1	74739831	1:74739831:T:G	ENSG00000162623	TYW3	chr1:74733418:74736542:clu_27789_?:ENSG00000162623	G	T	6422	0.260417	39	50	6.10361e-10	-0.990795	0.142573	1.91743e-13	2.35488e-07	1.00938e-05
1	74739906	1:74739906:T:C	ENSG00000162623	TYW3	chr1:74733418:74736542:clu_27789_?:ENSG00000162623	C	T	6497	0.328125	48	63	1.91744e-13	-1.09609	0.126355	1.91743e-13	2.35488e-07	1.00938e-05
1	74740304	1:74740304:G:C	ENSG00000162623	TYW3	chr1:74733418:74736542:clu_27789_?:ENSG00000162623	C	G	6895	0.260417	39	50	6.10361e-10	-0.990795	0.142573	1.91743e-13	2.35488e-07	1.00938e-05
1	74741975	1:74741975:T:C	ENSG00000162623	TYW3	chr1:74736622:74748751:clu_27790_?:ENSG00000162623	C	T	8566	0.0625	12	12	2.95823e-06	1.21954	0.244153	1.91743e-13	2.35488e-07	1.00938e-05
1	74742072	1:74742072:A:G	ENSG00000162623	TYW3	chr1:74733418:74736542:clu_27789_?:ENSG00000162623	G	A	8663	0.338542	49	65	1.60017e-11	-0.981515	0.12688	1.91743e-13	2.35488e-07	1.00938e-05
1	74742192	1:74742192:G:A	ENSG00000162623	TYW3	chr1:74733418:74736542:clu_27789_?:ENSG00000162623	A	G	8783	0.338542	49	65	1.60017e-11	-0.981515	0.12688	1.91743e-13	2.35488e-07	1.00938e-05
1	74744066	1:74744066:C:G	ENSG00000162623	TYW3	chr1:74733418:74736542:clu_27789_?:ENSG00000162623	G	C	10657	0.328125	48	63	1.91744e-13	-1.09609	0.126355	1.91743e-13	2.35488e-07	1.00938e-05
1	74744514	1:74744514:C:T	ENSG00000162623	TYW3	chr1:74736622:74748751:clu_27790_?:ENSG00000162623	T	C	11105	0.0625	12	12	2.95823e-06	1.21954	0.244153	1.91743e-13	2.35488e-07	1.00938e-05
1	74745954	1:74745954:T:A	ENSG00000162623	TYW3	chr1:74733418:74736542:clu_27789_?:ENSG00000162623	A	T	12545	0.328125	48	63	1.91744e-13	-1.09609	0.126355	1.91743e-13	2.35488e-07	1.00938e-05
1	74747148	1:74747148:G:C	ENSG00000162623	TYW3	chr1:74736622:74748751:clu_27790_?:ENSG00000162623	C	G	13739	0.0625	12	12	2.95823e-06	1.21954	0.244153	1.91743e-13	2.35488e-07	1.00938e-05
1	74747632	1:74747632:G:A	ENSG00000162623	TYW3	chr1:74733418:74736542:clu_27789_?:ENSG00000162623	A	G	14223	0.338542	49	65	1.60017e-11	-0.981515	0.12688	1.91743e-13	2.35488e-07	1.00938e-05
1	74748757	1:74748757:A:G	ENSG00000162623	TYW3	chr1:74733418:74736542:clu_27789_?:ENSG00000162623	G	A	15348	0.328125	48	63	1.91744e-13	-1.09609	0.126355	1.91743e-13	2.35488e-07	1.00938e-05
1	74750656	1:74750656:C:T	ENSG00000162623	TYW3	chr1:74733418:74736542:clu_27789_?:ENSG00000162623	T	C	17247	0.338542	49	65	1.60017e-11	-0.981515	0.12688	1.91743e-13	2.35488e-07	1.00938e-05
1	74753462	1:74753462:A:G	ENSG00000162623	TYW3	chr1:74733418:74736542:clu_27789_?:ENSG00000162623	G	A	20053	0.328125	48	63	1.91744e-13	-1.09609	0.126355	1.91743e-13	2.35488e-07	1.00938e-05
1	74756139	1:74756139:G:A	ENSG00000162623	TYW3	chr1:74736622:74748751:clu_27790_?:ENSG00000162623	A	G	22730	0.0572917	11	11	5.52015e-07	1.35248	0.250308	1.91743e-13	2.35488e-07	1.00938e-05
1	74757650	1:74757650:A:G	ENSG00000162623	TYW3	chr1:74736622:74748751:clu_27790_?:ENSG00000162623	G	A	24241	0.0572917	11	11	5.52015e-07	1.35248	0.250308	1.91743e-13	2.35488e-07	1.00938e-05
1	74759506	1:74759506:C:A	ENSG00000162623	TYW3	chr1:74733418:74736542:clu_27789_?:ENSG00000162623	A	C	26097	0.34375	49	66	2.71175e-12	-1.00779	0.124205	1.91743e-13	2.35488e-07	1.00938e-05
1	74763449	1:74763449:G:A	ENSG00000162623	TYW3	chr1:74733418:74736542:clu_27789_?:ENSG00000162623	A	G	30040	0.333333	49	64	4.13329e-13	-1.07517	0.126305	1.91743e-13	2.35488e-07	1.00938e-05
1	74763712	1:74763712:G:A	ENSG00000162623	TYW3	chr1:74733418:74736542:clu_27789_?:ENSG00000162623	A	G	30303	0.333333	49	64	4.13329e-13	-1.07517	0.126305	1.91743e-13	2.35488e-07	1.00938e-05
1	74766039	1:74766039:C:T	ENSG00000162623	TYW3	chr1:74733418:74736542:clu_27789_?:ENSG00000162623	T	C	32630	0.265625	40	51	2.26419e-09	-0.943707	0.141672	1.91743e-13	2.35488e-07	1.00938e-05
1	74766547	1:74766547:G:T	ENSG00000162623	TYW3	chr1:74733418:74736542:clu_27789_?:ENSG00000162623	T	G	33138	0.333333	49	64	4.13329e-13	-1.07517	0.126305	1.91743e-13	2.35488e-07	1.00938e-05
1	74767924	1:74767924:G:C	ENSG00000162623	TYW3	chr1:74733418:74736542:clu_27789_?:ENSG00000162623	C	G	34515	0.333333	49	64	4.13329e-13	-1.07517	0.126305	1.91743e-13	2.35488e-07	1.00938e-05
1	74768843	1:74768843:A:C	ENSG00000162623	TYW3	chr1:74733418:74736542:clu_27789_?:ENSG00000162623	C	A	35434	0.328125	48	63	1.91744e-13	-1.09609	0.126355	1.91743e-13	2.35488e-07	1.00938e-05
1	74772286	1:74772286:C:A	ENSG00000162623	TYW3	chr1:74733418:74736542:clu_27789_?:ENSG00000162623	A	C	38877	0.328125	48	63	1.91744e-13	-1.09609	0.126355	1.91743e-13	2.35488e-07	1.00938e-05
1	74773137	1:74773137:C:T	ENSG00000162623	TYW3	chr1:74733418:74736542:clu_27789_?:ENSG00000162623	T	C	39728	0.328125	48	63	1.91744e-13	-1.09609	0.126355	1.91743e-13	2.35488e-07	1.00938e-05
1	74776056	1:74776056:T:C	ENSG00000162623	TYW3	chr1:74733418:74736542:clu_27789_?:ENSG00000162623	C	T	42647	0.328125	48	63	1.91744e-13	-1.09609	0.126355	1.91743e-13	2.35488e-07	1.00938e-05
1	74776810	1:74776810:G:A	ENSG00000162623	TYW3	chr1:74733418:74736542:clu_27789_?:ENSG00000162623	A	G	43401	0.328125	48	63	1.91744e-13	-1.09609	0.126355	1.91743e-13	2.35488e-07	1.00938e-05
1	74779605	1:74779605:C:A	ENSG00000162623	TYW3	chr1:74733418:74736542:clu_27789_?:ENSG00000162623	A	C	46196	0.328125	48	63	1.91744e-13	-1.09609	0.126355	1.91743e-13	2.35488e-07	1.00938e-05
1	74782094	1:74782094:A:C	ENSG00000162623	TYW3	chr1:74733418:74736542:clu_27789_?:ENSG00000162623	C	A	48685	0.328125	48	63	1.91744e-13	-1.09609	0.126355	1.91743e-13	2.35488e-07	1.00938e-05
1	74783674	1:74783674:C:T	ENSG00000162623	TYW3	chr1:74733418:74736542:clu_27789_?:ENSG00000162623	T	C	50265	0.328125	48	63	1.91744e-13	-1.09609	0.126355	1.91743e-13	2.35488e-07	1.00938e-05
1	74783932	1:74783932:C:T	ENSG00000162623	TYW3	chr1:74733418:74736542:clu_27789_?:ENSG00000162623	T	C	50523	0.333333	49	64	1.79096e-12	-1.06247	0.129539	1.91743e-13	2.35488e-07	1.00938e-05
1	74786411	1:74786411:A:G	ENSG00000162623	TYW3	chr1:74733418:74736542:clu_27789_?:ENSG00000162623	G	A	53002	0.34375	49	66	1.29896e-12	-1.10122	0.133157	1.91743e-13	2.35488e-07	1.00938e-05
1	74786570	1:74786570:T:A	ENSG00000162623	TYW3	chr1:74733418:74736542:clu_27789_?:ENSG00000162623	A	T	53161	0.34375	49	66	1.29896e-12	-1.10122	0.133157	1.91743e-13	2.35488e-07	1.00938e-05
1	74786581	1:74786581:T:C	ENSG00000162623	TYW3	chr1:74733418:74736542:clu_27789_?:ENSG00000162623	C	T	53172	0.34375	49	66	1.29896e-12	-1.10122	0.133157	1.91743e-13	2.35488e-07	1.00938e-05
1	74786590	1:74786590:C:T	ENSG00000162623	TYW3	chr1:74733418:74736542:clu_27789_?:ENSG00000162623	T	C	53181	0.34375	49	66	1.29896e-12	-1.10122	0.133157	1.91743e-13	2.35488e-07	1.00938e-05
1	74786643	1:74786643:T:C	ENSG00000162623	TYW3	chr1:74733418:74736542:clu_27789_?:ENSG00000162623	C	T	53234	0.34375	49	66	1.29896e-12	-1.10122	0.133157	1.91743e-13	2.35488e-07	1.00938e-05
1	74787080	1:74787080:C:T	ENSG00000162623	TYW3	chr1:74733418:74736542:clu_27789_?:ENSG00000162623	T	C	53671	0.34375	49	66	1.29896e-12	-1.10122	0.133157	1.91743e-13	2.35488e-07	1.00938e-05
1	74787208	1:74787208:C:G	ENSG00000162623	TYW3	chr1:74733418:74736542:clu_27789_?:ENSG00000162623	G	C	53799	0.34375	49	66	1.29896e-12	-1.10122	0.133157	1.91743e-13	2.35488e-07	1.00938e-05
1	74788451	1:74788451:C:T	ENSG00000162623	TYW3	chr1:74733418:74736542:clu_27789_?:ENSG00000162623	T	C	55042	0.34375	49	66	1.29896e-12	-1.10122	0.133157	1.91743e-13	2.35488e-07	1.00938e-05
1	74788509	1:74788509:A:C	ENSG00000162623	TYW3	chr1:74733418:74736542:clu_27789_?:ENSG00000162623	C	A	55100	0.34375	49	66	1.29896e-12	-1.10122	0.133157	1.91743e-13	2.35488e-07	1.00938e-05
1	74788529	1:74788529:A:G	ENSG00000162623	TYW3	chr1:74733418:74736542:clu_27789_?:ENSG00000162623	G	A	55120	0.328125	48	63	1.91744e-13	-1.09609	0.126355	1.91743e-13	2.35488e-07	1.00938e-05
1	74789214	1:74789214:T:C	ENSG00000162623	TYW3	chr1:74733418:74736542:clu_27789_?:ENSG00000162623	C	T	55805	0.338542	48	65	1.49298e-10	-0.976482	0.134583	1.91743e-13	2.35488e-07	1.00938e-05
1	74792553	1:74792553:G:A	ENSG00000162623	TYW3	chr1:74733418:74736542:clu_27789_?:ENSG00000162623	A	G	59144	0.322917	47	62	2.1323e-11	-0.985731	0.128445	1.91743e-13	2.35488e-07	1.00938e-05
1	74794967	1:74794967:A:G	ENSG00000162623	TYW3	chr1:74733418:74736542:clu_27789_?:ENSG00000162623	G	A	61558	0.322917	47	62	2.1323e-11	-0.985731	0.128445	1.91743e-13	2.35488e-07	1.00938e-05
1	74796512	1:74796512:A:C	ENSG00000162623	TYW3	chr1:74733418:74736542:clu_27789_?:ENSG00000162623	C	A	63103	0.322917	47	62	2.1323e-11	-0.985731	0.128445	1.91743e-13	2.35488e-07	1.00938e-05
1	74798678	1:74798678:A:G	ENSG00000162623	TYW3	chr1:74733418:74736542:clu_27789_?:ENSG00000162623	G	A	65269	0.322917	47	62	2.1323e-11	-0.985731	0.128445	1.91743e-13	2.35488e-07	1.00938e-05
1	74800972	1:74800972:T:G	ENSG00000162623	TYW3	chr1:74733418:74736542:clu_27789_?:ENSG00000162623	G	T	67563	0.322917	47	62	2.1323e-11	-0.985731	0.128445	1.91743e-13	2.35488e-07	1.00938e-05
1	78605651	1:78605651:A:G	ENSG00000137959	IFI44L	chr1:78620571:78628951:clu_27836_?:ENSG00000137959	G	A	-14271	0.296875	49	57	1.44551e-06	-0.730496	0.141268	5.95519e-28	2.0713e-17	7.1179e-06
1	78617087	1:78617087:G:A	ENSG00000137959	IFI44L	chr1:78628393:78628951:clu_27836_?:ENSG00000137959	G	A	-2835	0.515625	70	93	2.68152e-06	0.724479	0.144339	5.95519e-28	2.0713e-17	7.1179e-06
1	78617087	1:78617087:G:A	ENSG00000137959	IFI44L	chr1:78620571:78628951:clu_27836_?:ENSG00000137959	G	A	-2835	0.515625	70	93	6.76222e-16	-1.12021	0.113538	5.95519e-28	2.0713e-17	7.1179e-06
1	78617087	1:78617087:G:A	ENSG00000137959	IFI44L	chr1:78620571:78627906:clu_27836_?:ENSG00000137959	G	A	-2835	0.515625	70	93	2.32218e-07	0.856785	0.152767	5.95519e-28	2.0713e-17	7.1179e-06
1	78619049	1:78619049:G:A	ENSG00000137959	IFI44L	chr1:78620571:78628951:clu_27836_?:ENSG00000137959	A	G	-873	0.302083	45	58	1.92947e-08	0.912742	0.147645	5.95519e-28	2.0713e-17	7.1179e-06
1	78623717	1:78623717:A:T	ENSG00000137959	IFI44L	chr1:78620571:78628951:clu_27836_?:ENSG00000137959	A	T	3795	0.515625	70	93	6.76222e-16	-1.12021	0.113538	5.95519e-28	2.0713e-17	7.1179e-06
1	78623717	1:78623717:A:T	ENSG00000137959	IFI44L	chr1:78620571:78627906:clu_27836_?:ENSG00000137959	A	T	3795	0.515625	70	93	2.32218e-07	0.856785	0.152767	5.95519e-28	2.0713e-17	7.1179e-06
1	78623717	1:78623717:A:T	ENSG00000137959	IFI44L	chr1:78628393:78628951:clu_27836_?:ENSG00000137959	A	T	3795	0.515625	70	93	2.68152e-06	0.724479	0.144339	5.95519e-28	2.0713e-17	7.1179e-06
1	78626734	1:78626734:G:A	ENSG00000137959	IFI44L	chr1:78620571:78628951:clu_27836_?:ENSG00000137959	G	A	6812	0.510417	70	94	7.15687e-16	-1.10659	0.112294	5.95519e-28	2.0713e-17	7.1179e-06
1	78626734	1:78626734:G:A	ENSG00000137959	IFI44L	chr1:78620571:78627906:clu_27836_?:ENSG00000137959	G	A	6812	0.510417	70	94	5.27885e-08	0.884208	0.148543	5.95519e-28	2.0713e-17	7.1179e-06
1	78628133	1:78628133:A:G	ENSG00000137959	IFI44L	chr1:78620571:78627906:clu_27836_?:ENSG00000137959	G	A	8211	0.479167	68	92	6.2688e-08	0.869346	0.147023	5.95519e-28	2.0713e-17	7.1179e-06
1	78628133	1:78628133:A:G	ENSG00000137959	IFI44L	chr1:78620571:78628951:clu_27836_?:ENSG00000137959	G	A	8211	0.479167	68	92	9.11175e-22	-1.21682	0.0951877	5.95519e-28	2.0713e-17	7.1179e-06
1	78628133	1:78628133:A:G	ENSG00000137959	IFI44L	chr1:78628393:78628951:clu_27836_?:ENSG00000137959	G	A	8211	0.479167	68	92	2.56333e-09	0.865762	0.130508	5.95519e-28	2.0713e-17	7.1179e-06
1	78628396	1:78628396:T:A	ENSG00000137959	IFI44L	chr1:78628393:78628951:clu_27836_?:ENSG00000137959	A	T	8474	0.447917	64	86	3.00463e-11	0.971752	0.127847	5.95519e-28	2.0713e-17	7.1179e-06
1	78628396	1:78628396:T:A	ENSG00000137959	IFI44L	chr1:78620571:78628951:clu_27836_?:ENSG00000137959	A	T	8474	0.447917	64	86	5.9552e-28	-1.34229	0.0834114	5.95519e-28	2.0713e-17	7.1179e-06
1	78628396	1:78628396:T:A	ENSG00000137959	IFI44L	chr1:78620571:78627906:clu_27836_?:ENSG00000137959	A	T	8474	0.447917	64	86	7.43995e-10	0.99499	0.144074	5.95519e-28	2.0713e-17	7.1179e-06
1	78628396	1:78628396:T:A	ENSG00000137959	IFI44L	chr1:78620971:78628951:clu_27836_?:ENSG00000137959	A	T	8474	0.447917	64	86	1.86132e-07	-0.694893	0.122765	5.95519e-28	2.0713e-17	7.1179e-06
1	78629654	1:78629654:A:C	ENSG00000137959	IFI44L	chr1:78620571:78627906:clu_27836_?:ENSG00000137959	A	C	9732	0.515625	70	93	2.32218e-07	0.856785	0.152767	5.95519e-28	2.0713e-17	7.1179e-06
1	78629654	1:78629654:A:C	ENSG00000137959	IFI44L	chr1:78620571:78628951:clu_27836_?:ENSG00000137959	A	C	9732	0.515625	70	93	6.76222e-16	-1.12021	0.113538	5.95519e-28	2.0713e-17	7.1179e-06
1	78629654	1:78629654:A:C	ENSG00000137959	IFI44L	chr1:78628393:78628951:clu_27836_?:ENSG00000137959	A	C	9732	0.515625	70	93	2.68152e-06	0.724479	0.144339	5.95519e-28	2.0713e-17	7.1179e-06
1	78635077	1:78635077:A:T	ENSG00000137959	IFI44L	chr1:78620571:78628951:clu_27836_?:ENSG00000137959	T	A	15155	0.427083	61	82	3.94309e-14	-1.10777	0.122969	5.95519e-28	2.0713e-17	7.1179e-06
1	78641214	1:78641214:T:C	ENSG00000137959	IFI44L	chr1:78628393:78628951:clu_27836_?:ENSG00000137959	T	C	21292	0.515625	70	93	2.68152e-06	0.724479	0.144339	5.95519e-28	2.0713e-17	7.1179e-06
1	78641214	1:78641214:T:C	ENSG00000137959	IFI44L	chr1:78620571:78628951:clu_27836_?:ENSG00000137959	T	C	21292	0.515625	70	93	6.76222e-16	-1.12021	0.113538	5.95519e-28	2.0713e-17	7.1179e-06
1	78641214	1:78641214:T:C	ENSG00000137959	IFI44L	chr1:78620571:78627906:clu_27836_?:ENSG00000137959	T	C	21292	0.515625	70	93	2.32218e-07	0.856785	0.152767	5.95519e-28	2.0713e-17	7.1179e-06
1	78643199	1:78643199:G:A	ENSG00000137959	IFI44L	chr1:78620571:78627906:clu_27836_?:ENSG00000137959	A	G	23277	0.395833	55	76	4.00326e-06	0.829291	0.168565	5.95519e-28	2.0713e-17	7.1179e-06
1	78643199	1:78643199:G:A	ENSG00000137959	IFI44L	chr1:78620571:78628951:clu_27836_?:ENSG00000137959	A	G	23277	0.395833	55	76	2.71052e-16	-1.20893	0.120175	5.95519e-28	2.0713e-17	7.1179e-06
1	78643199	1:78643199:G:A	ENSG00000137959	IFI44L	chr1:78628393:78628951:clu_27836_?:ENSG00000137959	A	G	23277	0.395833	55	76	2.10777e-06	0.781855	0.15395	5.95519e-28	2.0713e-17	7.1179e-06
1	78644833	1:78644833:A:G	ENSG00000137959	IFI44L	chr1:78620571:78628951:clu_27836_?:ENSG00000137959	G	A	24911	0.390625	55	75	1.94596e-15	-1.14287	0.118517	5.95519e-28	2.0713e-17	7.1179e-06
1	78644833	1:78644833:A:G	ENSG00000137959	IFI44L	chr1:78620571:78627906:clu_27836_?:ENSG00000137959	G	A	24911	0.390625	55	75	1.13517e-06	0.838641	0.16036	5.95519e-28	2.0713e-17	7.1179e-06
1	78644833	1:78644833:A:G	ENSG00000137959	IFI44L	chr1:78628393:78628951:clu_27836_?:ENSG00000137959	G	A	24911	0.390625	55	75	1.46842e-06	0.764257	0.147907	5.95519e-28	2.0713e-17	7.1179e-06
1	93246441	1:93246441:C:G	ENSG00000223745	CCDC18-AS1	chr1:93339274:93339357:clu_27995_?:ENSG00000223745	G	C	-99465	0.15625	23	30	1.69685e-13	-1.17657	0.135229	1.69682e-13	9.37068e-07	1.43121e-05
1	93246975	1:93246975:G:A	ENSG00000223745	CCDC18-AS1	chr1:93339274:93339357:clu_27995_?:ENSG00000223745	A	G	-98931	0.15625	23	30	1.69685e-13	-1.17657	0.135229	1.69682e-13	9.37068e-07	1.43121e-05
1	93250664	1:93250664:T:C	ENSG00000223745	CCDC18-AS1	chr1:93339274:93339357:clu_27995_?:ENSG00000223745	C	T	-95242	0.21875	32	42	2.06824e-07	-0.810939	0.143894	1.69682e-13	9.37068e-07	1.43121e-05
1	93257326	1:93257326:C:T	ENSG00000223745	CCDC18-AS1	chr1:93339274:93339357:clu_27995_?:ENSG00000223745	T	C	-88580	0.21875	32	42	2.06824e-07	-0.810939	0.143894	1.69682e-13	9.37068e-07	1.43121e-05
1	93258549	1:93258549:A:G	ENSG00000223745	CCDC18-AS1	chr1:93339274:93339357:clu_27995_?:ENSG00000223745	G	A	-87357	0.15625	23	30	1.69685e-13	-1.17657	0.135229	1.69682e-13	9.37068e-07	1.43121e-05
1	93261112	1:93261112:A:C	ENSG00000223745	CCDC18-AS1	chr1:93339274:93339357:clu_27995_?:ENSG00000223745	C	A	-84794	0.15625	23	30	1.69685e-13	-1.17657	0.135229	1.69682e-13	9.37068e-07	1.43121e-05
1	93263451	1:93263451:C:A	ENSG00000223745	CCDC18-AS1	chr1:93339274:93339357:clu_27995_?:ENSG00000223745	A	C	-82455	0.15625	23	30	1.69685e-13	-1.17657	0.135229	1.69682e-13	9.37068e-07	1.43121e-05
1	93269950	1:93269950:G:A	ENSG00000223745	CCDC18-AS1	chr1:93339274:93339357:clu_27995_?:ENSG00000223745	A	G	-75956	0.0520833	8	10	1.17002e-07	-1.40885	0.244224	1.69682e-13	9.37068e-07	1.43121e-05
1	93272003	1:93272003:G:A	ENSG00000223745	CCDC18-AS1	chr1:93339274:93339357:clu_27995_?:ENSG00000223745	A	G	-73903	0.15625	23	30	1.69685e-13	-1.17657	0.135229	1.69682e-13	9.37068e-07	1.43121e-05
1	93273671	1:93273671:A:G	ENSG00000223745	CCDC18-AS1	chr1:93339274:93339357:clu_27995_?:ENSG00000223745	G	A	-72235	0.192708	30	37	4.09893e-06	-0.78387	0.159524	1.69682e-13	9.37068e-07	1.43121e-05
1	93274721	1:93274721:C:A	ENSG00000223745	CCDC18-AS1	chr1:93339274:93339357:clu_27995_?:ENSG00000223745	A	C	-71185	0.21875	32	42	2.06824e-07	-0.810939	0.143894	1.69682e-13	9.37068e-07	1.43121e-05
1	93275468	1:93275468:C:T	ENSG00000223745	CCDC18-AS1	chr1:93339274:93339357:clu_27995_?:ENSG00000223745	T	C	-70438	0.15625	23	30	1.69685e-13	-1.17657	0.135229	1.69682e-13	9.37068e-07	1.43121e-05
1	93276893	1:93276893:C:G	ENSG00000223745	CCDC18-AS1	chr1:93339274:93339357:clu_27995_?:ENSG00000223745	G	C	-69013	0.15625	23	30	1.69685e-13	-1.17657	0.135229	1.69682e-13	9.37068e-07	1.43121e-05
1	93278498	1:93278498:G:A	ENSG00000223745	CCDC18-AS1	chr1:93339274:93339357:clu_27995_?:ENSG00000223745	A	G	-67408	0.21875	32	42	2.06824e-07	-0.810939	0.143894	1.69682e-13	9.37068e-07	1.43121e-05
1	93280454	1:93280454:G:A	ENSG00000223745	CCDC18-AS1	chr1:93339274:93339357:clu_27995_?:ENSG00000223745	A	G	-65452	0.15625	23	30	1.69685e-13	-1.17657	0.135229	1.69682e-13	9.37068e-07	1.43121e-05
1	93280982	1:93280982:A:T	ENSG00000223745	CCDC18-AS1	chr1:93339274:93339357:clu_27995_?:ENSG00000223745	T	A	-64924	0.15625	23	30	1.69685e-13	-1.17657	0.135229	1.69682e-13	9.37068e-07	1.43121e-05
1	93281309	1:93281309:T:C	ENSG00000223745	CCDC18-AS1	chr1:93339274:93339357:clu_27995_?:ENSG00000223745	C	T	-64597	0.21875	32	42	2.06824e-07	-0.810939	0.143894	1.69682e-13	9.37068e-07	1.43121e-05
1	93284433	1:93284433:G:A	ENSG00000223745	CCDC18-AS1	chr1:93339274:93339357:clu_27995_?:ENSG00000223745	A	G	-61473	0.161458	23	31	3.64336e-13	-1.13726	0.133182	1.69682e-13	9.37068e-07	1.43121e-05
1	93286280	1:93286280:T:G	ENSG00000223745	CCDC18-AS1	chr1:93339274:93339357:clu_27995_?:ENSG00000223745	G	T	-59626	0.21875	32	42	2.06824e-07	-0.810939	0.143894	1.69682e-13	9.37068e-07	1.43121e-05
1	93287725	1:93287725:A:G	ENSG00000223745	CCDC18-AS1	chr1:93339274:93339357:clu_27995_?:ENSG00000223745	G	A	-58181	0.21875	32	42	2.06824e-07	-0.810939	0.143894	1.69682e-13	9.37068e-07	1.43121e-05
1	93288698	1:93288698:C:T	ENSG00000223745	CCDC18-AS1	chr1:93339274:93339357:clu_27995_?:ENSG00000223745	T	C	-57208	0.15625	23	30	1.69685e-13	-1.17657	0.135229	1.69682e-13	9.37068e-07	1.43121e-05
1	93288745	1:93288745:C:T	ENSG00000223745	CCDC18-AS1	chr1:93339274:93339357:clu_27995_?:ENSG00000223745	T	C	-57161	0.15625	23	30	1.69685e-13	-1.17657	0.135229	1.69682e-13	9.37068e-07	1.43121e-05
1	93289269	1:93289269:C:T	ENSG00000223745	CCDC18-AS1	chr1:93339274:93339357:clu_27995_?:ENSG00000223745	T	C	-56637	0.15625	23	30	1.69685e-13	-1.17657	0.135229	1.69682e-13	9.37068e-07	1.43121e-05
1	93291923	1:93291923:C:T	ENSG00000223745	CCDC18-AS1	chr1:93339274:93339357:clu_27995_?:ENSG00000223745	T	C	-53983	0.15625	23	30	1.69685e-13	-1.17657	0.135229	1.69682e-13	9.37068e-07	1.43121e-05
1	93297609	1:93297609:C:A	ENSG00000223745	CCDC18-AS1	chr1:93339274:93339357:clu_27995_?:ENSG00000223745	C	A	-48297	0.84375	23	30	1.69682e-13	1.17657	0.135229	1.69682e-13	9.37068e-07	1.43121e-05
1	93300257	1:93300257:G:A	ENSG00000223745	CCDC18-AS1	chr1:93339274:93339357:clu_27995_?:ENSG00000223745	G	A	-45649	0.78125	32	42	2.06824e-07	0.810939	0.143894	1.69682e-13	9.37068e-07	1.43121e-05
1	93302850	1:93302850:G:T	ENSG00000223745	CCDC18-AS1	chr1:93339274:93339357:clu_27995_?:ENSG00000223745	G	T	-43056	0.78125	32	42	2.06824e-07	0.810939	0.143894	1.69682e-13	9.37068e-07	1.43121e-05
1	93306038	1:93306038:T:C	ENSG00000223745	CCDC18-AS1	chr1:93339274:93339357:clu_27995_?:ENSG00000223745	T	C	-39868	0.84375	23	30	1.69682e-13	1.17657	0.135229	1.69682e-13	9.37068e-07	1.43121e-05
1	93307414	1:93307414:T:C	ENSG00000223745	CCDC18-AS1	chr1:93339274:93339357:clu_27995_?:ENSG00000223745	T	C	-38492	0.84375	23	30	1.69682e-13	1.17657	0.135229	1.69682e-13	9.37068e-07	1.43121e-05
1	93311694	1:93311694:A:G	ENSG00000223745	CCDC18-AS1	chr1:93339274:93339357:clu_27995_?:ENSG00000223745	A	G	-34212	0.84375	23	30	1.69682e-13	1.17657	0.135229	1.69682e-13	9.37068e-07	1.43121e-05
1	93313748	1:93313748:G:C	ENSG00000223745	CCDC18-AS1	chr1:93339274:93339357:clu_27995_?:ENSG00000223745	G	C	-32158	0.84375	23	30	1.69682e-13	1.17657	0.135229	1.69682e-13	9.37068e-07	1.43121e-05
1	93316131	1:93316131:A:C	ENSG00000223745	CCDC18-AS1	chr1:93339274:93339357:clu_27995_?:ENSG00000223745	A	C	-29775	0.84375	23	30	1.69682e-13	1.17657	0.135229	1.69682e-13	9.37068e-07	1.43121e-05
1	93317421	1:93317421:G:A	ENSG00000223745	CCDC18-AS1	chr1:93339274:93339357:clu_27995_?:ENSG00000223745	A	G	-28485	0.15625	23	30	1.69685e-13	-1.17657	0.135229	1.69682e-13	9.37068e-07	1.43121e-05
1	93318238	1:93318238:A:G	ENSG00000223745	CCDC18-AS1	chr1:93339274:93339357:clu_27995_?:ENSG00000223745	A	G	-27668	0.947917	8	10	1.17001e-07	1.40885	0.244224	1.69682e-13	9.37068e-07	1.43121e-05
1	93323591	1:93323591:A:T	ENSG00000223745	CCDC18-AS1	chr1:93339274:93339357:clu_27995_?:ENSG00000223745	A	T	-22315	0.84375	23	30	1.69682e-13	1.17657	0.135229	1.69682e-13	9.37068e-07	1.43121e-05
1	93324516	1:93324516:C:A	ENSG00000223745	CCDC18-AS1	chr1:93339274:93339357:clu_27995_?:ENSG00000223745	C	A	-21390	0.84375	23	30	1.69682e-13	1.17657	0.135229	1.69682e-13	9.37068e-07	1.43121e-05
1	93338159	1:93338159:C:T	ENSG00000223745	CCDC18-AS1	chr1:93339274:93339357:clu_27995_?:ENSG00000223745	C	T	-7747	0.84375	23	30	1.69682e-13	1.17657	0.135229	1.69682e-13	9.37068e-07	1.43121e-05
1	93338620	1:93338620:C:G	ENSG00000223745	CCDC18-AS1	chr1:93339274:93339357:clu_27995_?:ENSG00000223745	C	G	-7286	0.84375	23	30	1.69682e-13	1.17657	0.135229	1.69682e-13	9.37068e-07	1.43121e-05
1	93339226	1:93339226:A:G	ENSG00000223745	CCDC18-AS1	chr1:93339274:93339357:clu_27995_?:ENSG00000223745	A	G	-6680	0.84375	23	30	1.69682e-13	1.17657	0.135229	1.69682e-13	9.37068e-07	1.43121e-05
1	93339430	1:93339430:C:G	ENSG00000223745	CCDC18-AS1	chr1:93339274:93339357:clu_27995_?:ENSG00000223745	C	G	-6476	0.78125	32	42	2.06824e-07	0.810939	0.143894	1.69682e-13	9.37068e-07	1.43121e-05
1	93340450	1:93340450:C:T	ENSG00000223745	CCDC18-AS1	chr1:93339274:93339357:clu_27995_?:ENSG00000223745	C	T	-5456	0.84375	23	30	1.69682e-13	1.17657	0.135229	1.69682e-13	9.37068e-07	1.43121e-05
1	93340918	1:93340918:T:C	ENSG00000223745	CCDC18-AS1	chr1:93339274:93339357:clu_27995_?:ENSG00000223745	T	C	-4988	0.84375	23	30	1.69682e-13	1.17657	0.135229	1.69682e-13	9.37068e-07	1.43121e-05
1	93341565	1:93341565:A:G	ENSG00000223745	CCDC18-AS1	chr1:93339274:93339357:clu_27995_?:ENSG00000223745	A	G	-4341	0.84375	23	30	1.69682e-13	1.17657	0.135229	1.69682e-13	9.37068e-07	1.43121e-05
1	93344670	1:93344670:A:G	ENSG00000223745	CCDC18-AS1	chr1:93339274:93339357:clu_27995_?:ENSG00000223745	A	G	-1236	0.84375	23	30	1.69682e-13	1.17657	0.135229	1.69682e-13	9.37068e-07	1.43121e-05
1	93345317	1:93345317:T:C	ENSG00000223745	CCDC18-AS1	chr1:93339274:93339357:clu_27995_?:ENSG00000223745	T	C	-589	0.78125	32	42	2.06824e-07	0.810939	0.143894	1.69682e-13	9.37068e-07	1.43121e-05
1	93345343	1:93345343:A:G	ENSG00000223745	CCDC18-AS1	chr1:93339274:93339357:clu_27995_?:ENSG00000223745	A	G	-563	0.84375	23	30	1.69682e-13	1.17657	0.135229	1.69682e-13	9.37068e-07	1.43121e-05
1	93347873	1:93347873:T:C	ENSG00000223745	CCDC18-AS1	chr1:93305470:93339357:clu_27995_?:ENSG00000223745	T	C	1967	0.869792	21	25	2.79633e-06	-0.670386	0.133839	1.69682e-13	9.37068e-07	1.43121e-05
1	93347873	1:93347873:T:C	ENSG00000223745	CCDC18-AS1	chr1:93339274:93339357:clu_27995_?:ENSG00000223745	T	C	1967	0.869792	21	25	4.9188e-13	1.31927	0.155654	1.69682e-13	9.37068e-07	1.43121e-05
1	93348854	1:93348854:A:G	ENSG00000117505	DR1	chr1:93346865:93353908:clu_28006_?:ENSG00000117505	G	A	2828	0.484375	64	93	1.29475e-05	-0.675739	0.146204	4.7965e-06	0.0252519	5.95215e-05
1	93349933	1:93349933:T:C	ENSG00000117505	DR1	chr1:93346865:93353908:clu_28006_?:ENSG00000117505	C	T	3907	0.494792	65	95	4.7965e-06	-0.694521	0.142482	4.7965e-06	0.0252519	5.95215e-05
1	93350843	1:93350843:A:G	ENSG00000117505	DR1	chr1:93346865:93353908:clu_28006_?:ENSG00000117505	G	A	4817	0.494792	65	95	4.7965e-06	-0.694521	0.142482	4.7965e-06	0.0252519	5.95215e-05
1	93352261	1:93352261:A:G	ENSG00000223745	CCDC18-AS1	chr1:93339274:93339357:clu_27995_?:ENSG00000223745	A	G	6355	0.869792	21	25	4.9188e-13	1.31927	0.155654	1.69682e-13	9.37068e-07	1.43121e-05
1	93352261	1:93352261:A:G	ENSG00000223745	CCDC18-AS1	chr1:93305470:93339357:clu_27995_?:ENSG00000223745	A	G	6355	0.869792	21	25	2.79633e-06	-0.670386	0.133839	1.69682e-13	9.37068e-07	1.43121e-05
1	93352389	1:93352389:A:G	ENSG00000117505	DR1	chr1:93346865:93353908:clu_28006_?:ENSG00000117505	G	A	6363	0.494792	65	95	4.7965e-06	-0.694521	0.142482	4.7965e-06	0.0252519	5.95215e-05
1	93355018	1:93355018:G:A	ENSG00000117505	DR1	chr1:93346865:93353908:clu_28006_?:ENSG00000117505	A	G	8992	0.494792	65	95	4.7965e-06	-0.694521	0.142482	4.7965e-06	0.0252519	5.95215e-05
1	93355127	1:93355127:A:G	ENSG00000117505	DR1	chr1:93346865:93353908:clu_28006_?:ENSG00000117505	G	A	9101	0.479167	64	92	4.31581e-05	-0.655951	0.152357	4.7965e-06	0.0252519	5.95215e-05
1	93356629	1:93356629:C:T	ENSG00000223745	CCDC18-AS1	chr1:93339274:93339357:clu_27995_?:ENSG00000223745	C	T	10723	0.807292	30	37	4.09893e-06	0.78387	0.159524	1.69682e-13	9.37068e-07	1.43121e-05
1	93360081	1:93360081:T:A	ENSG00000117505	DR1	chr1:93346865:93353908:clu_28006_?:ENSG00000117505	A	T	14055	0.494792	65	95	4.7965e-06	-0.694521	0.142482	4.7965e-06	0.0252519	5.95215e-05
1	93361899	1:93361899:T:A	ENSG00000223745	CCDC18-AS1	chr1:93305470:93339357:clu_27995_?:ENSG00000223745	T	A	15993	0.869792	21	25	2.79633e-06	-0.670386	0.133839	1.69682e-13	9.37068e-07	1.43121e-05
1	93361899	1:93361899:T:A	ENSG00000223745	CCDC18-AS1	chr1:93339274:93339357:clu_27995_?:ENSG00000223745	T	A	15993	0.869792	21	25	4.9188e-13	1.31927	0.155654	1.69682e-13	9.37068e-07	1.43121e-05
1	93362966	1:93362966:T:A	ENSG00000117505	DR1	chr1:93346865:93353908:clu_28006_?:ENSG00000117505	A	T	16940	0.494792	65	95	4.7965e-06	-0.694521	0.142482	4.7965e-06	0.0252519	5.95215e-05
1	93363350	1:93363350:C:T	ENSG00000223745	CCDC18-AS1	chr1:93339274:93339357:clu_27995_?:ENSG00000223745	C	T	17444	0.807292	30	37	4.09893e-06	0.78387	0.159524	1.69682e-13	9.37068e-07	1.43121e-05
1	93363691	1:93363691:C:G	ENSG00000117505	DR1	chr1:93346865:93353908:clu_28006_?:ENSG00000117505	G	C	17665	0.494792	65	95	4.7965e-06	-0.694521	0.142482	4.7965e-06	0.0252519	5.95215e-05
1	93364312	1:93364312:A:G	ENSG00000223745	CCDC18-AS1	chr1:93305470:93339357:clu_27995_?:ENSG00000223745	A	G	18406	0.869792	21	25	2.79633e-06	-0.670386	0.133839	1.69682e-13	9.37068e-07	1.43121e-05
1	93364312	1:93364312:A:G	ENSG00000223745	CCDC18-AS1	chr1:93339274:93339357:clu_27995_?:ENSG00000223745	A	G	18406	0.869792	21	25	4.9188e-13	1.31927	0.155654	1.69682e-13	9.37068e-07	1.43121e-05
1	93364923	1:93364923:G:C	ENSG00000223745	CCDC18-AS1	chr1:93305470:93339357:clu_27995_?:ENSG00000223745	G	C	19017	0.869792	21	25	2.79633e-06	-0.670386	0.133839	1.69682e-13	9.37068e-07	1.43121e-05
1	93364923	1:93364923:G:C	ENSG00000223745	CCDC18-AS1	chr1:93339274:93339357:clu_27995_?:ENSG00000223745	G	C	19017	0.869792	21	25	4.9188e-13	1.31927	0.155654	1.69682e-13	9.37068e-07	1.43121e-05
1	93366150	1:93366150:G:A	ENSG00000223745	CCDC18-AS1	chr1:93305470:93339357:clu_27995_?:ENSG00000223745	G	A	20244	0.869792	21	25	2.79633e-06	-0.670386	0.133839	1.69682e-13	9.37068e-07	1.43121e-05
1	93366150	1:93366150:G:A	ENSG00000223745	CCDC18-AS1	chr1:93339274:93339357:clu_27995_?:ENSG00000223745	G	A	20244	0.869792	21	25	4.9188e-13	1.31927	0.155654	1.69682e-13	9.37068e-07	1.43121e-05
1	93367969	1:93367969:A:C	ENSG00000223745	CCDC18-AS1	chr1:93339274:93339357:clu_27995_?:ENSG00000223745	A	C	22063	0.807292	30	37	4.09893e-06	0.78387	0.159524	1.69682e-13	9.37068e-07	1.43121e-05
1	93367980	1:93367980:C:T	ENSG00000117505	DR1	chr1:93346865:93353908:clu_28006_?:ENSG00000117505	T	C	21954	0.494792	65	95	4.7965e-06	-0.694521	0.142482	4.7965e-06	0.0252519	5.95215e-05
1	93371409	1:93371409:G:A	ENSG00000117505	DR1	chr1:93346865:93353908:clu_28006_?:ENSG00000117505	A	G	25383	0.494792	65	95	4.7965e-06	-0.694521	0.142482	4.7965e-06	0.0252519	5.95215e-05
1	93371576	1:93371576:T:C	ENSG00000117505	DR1	chr1:93346865:93353908:clu_28006_?:ENSG00000117505	C	T	25550	0.484375	64	93	1.29475e-05	-0.675739	0.146204	4.7965e-06	0.0252519	5.95215e-05
1	93375200	1:93375200:T:C	ENSG00000223745	CCDC18-AS1	chr1:93339274:93339357:clu_27995_?:ENSG00000223745	T	C	29294	0.807292	30	37	4.09893e-06	0.78387	0.159524	1.69682e-13	9.37068e-07	1.43121e-05
1	93375829	1:93375829:G:A	ENSG00000223745	CCDC18-AS1	chr1:93305470:93339357:clu_27995_?:ENSG00000223745	G	A	29923	0.869792	21	25	2.79633e-06	-0.670386	0.133839	1.69682e-13	9.37068e-07	1.43121e-05
1	93375829	1:93375829:G:A	ENSG00000223745	CCDC18-AS1	chr1:93339274:93339357:clu_27995_?:ENSG00000223745	G	A	29923	0.869792	21	25	4.9188e-13	1.31927	0.155654	1.69682e-13	9.37068e-07	1.43121e-05
1	93375908	1:93375908:T:C	ENSG00000223745	CCDC18-AS1	chr1:93339274:93339357:clu_27995_?:ENSG00000223745	T	C	30002	0.807292	30	37	4.09893e-06	0.78387	0.159524	1.69682e-13	9.37068e-07	1.43121e-05
1	93375977	1:93375977:T:G	ENSG00000223745	CCDC18-AS1	chr1:93339274:93339357:clu_27995_?:ENSG00000223745	T	G	30071	0.807292	30	37	4.09893e-06	0.78387	0.159524	1.69682e-13	9.37068e-07	1.43121e-05
1	93375983	1:93375983:A:G	ENSG00000223745	CCDC18-AS1	chr1:93339274:93339357:clu_27995_?:ENSG00000223745	A	G	30077	0.807292	30	37	4.09893e-06	0.78387	0.159524	1.69682e-13	9.37068e-07	1.43121e-05
1	93376466	1:93376466:A:C	ENSG00000117505	DR1	chr1:93346865:93353908:clu_28006_?:ENSG00000117505	C	A	30440	0.494792	65	95	4.7965e-06	-0.694521	0.142482	4.7965e-06	0.0252519	5.95215e-05
1	93380098	1:93380098:T:A	ENSG00000117505	DR1	chr1:93346865:93353908:clu_28006_?:ENSG00000117505	A	T	34072	0.494792	65	95	4.7965e-06	-0.694521	0.142482	4.7965e-06	0.0252519	5.95215e-05
1	93380117	1:93380117:A:C	ENSG00000117505	DR1	chr1:93346865:93353908:clu_28006_?:ENSG00000117505	C	A	34091	0.494792	65	95	4.7965e-06	-0.694521	0.142482	4.7965e-06	0.0252519	5.95215e-05
1	93380251	1:93380251:G:A	ENSG00000223745	CCDC18-AS1	chr1:93339274:93339357:clu_27995_?:ENSG00000223745	G	A	34345	0.807292	30	37	4.09893e-06	0.78387	0.159524	1.69682e-13	9.37068e-07	1.43121e-05
1	93381148	1:93381148:A:G	ENSG00000223745	CCDC18-AS1	chr1:93339274:93339357:clu_27995_?:ENSG00000223745	A	G	35242	0.807292	30	37	4.09893e-06	0.78387	0.159524	1.69682e-13	9.37068e-07	1.43121e-05
1	93381791	1:93381791:G:A	ENSG00000223745	CCDC18-AS1	chr1:93339274:93339357:clu_27995_?:ENSG00000223745	G	A	35885	0.869792	21	25	4.9188e-13	1.31927	0.155654	1.69682e-13	9.37068e-07	1.43121e-05
1	93381791	1:93381791:G:A	ENSG00000223745	CCDC18-AS1	chr1:93305470:93339357:clu_27995_?:ENSG00000223745	G	A	35885	0.869792	21	25	2.79633e-06	-0.670386	0.133839	1.69682e-13	9.37068e-07	1.43121e-05
1	93381863	1:93381863:A:G	ENSG00000117505	DR1	chr1:93346865:93353908:clu_28006_?:ENSG00000117505	G	A	35837	0.494792	65	95	4.7965e-06	-0.694521	0.142482	4.7965e-06	0.0252519	5.95215e-05
1	93382956	1:93382956:T:C	ENSG00000117505	DR1	chr1:93346865:93353908:clu_28006_?:ENSG00000117505	C	T	36930	0.494792	65	95	4.7965e-06	-0.694521	0.142482	4.7965e-06	0.0252519	5.95215e-05
1	93384726	1:93384726:C:A	ENSG00000117505	DR1	chr1:93346865:93353908:clu_28006_?:ENSG00000117505	A	C	38700	0.484375	64	93	1.29475e-05	-0.675739	0.146204	4.7965e-06	0.0252519	5.95215e-05
1	93385738	1:93385738:T:C	ENSG00000223745	CCDC18-AS1	chr1:93339274:93339357:clu_27995_?:ENSG00000223745	T	C	39832	0.807292	30	37	4.09893e-06	0.78387	0.159524	1.69682e-13	9.37068e-07	1.43121e-05
1	93387458	1:93387458:G:C	ENSG00000117505	DR1	chr1:93346865:93353908:clu_28006_?:ENSG00000117505	C	G	41432	0.484375	64	93	1.29475e-05	-0.675739	0.146204	4.7965e-06	0.0252519	5.95215e-05
1	93387890	1:93387890:T:A	ENSG00000223745	CCDC18-AS1	chr1:93339274:93339357:clu_27995_?:ENSG00000223745	T	A	41984	0.807292	30	37	4.09893e-06	0.78387	0.159524	1.69682e-13	9.37068e-07	1.43121e-05
1	93388277	1:93388277:T:G	ENSG00000223745	CCDC18-AS1	chr1:93305470:93339357:clu_27995_?:ENSG00000223745	T	G	42371	0.869792	21	25	2.79633e-06	-0.670386	0.133839	1.69682e-13	9.37068e-07	1.43121e-05
1	93388277	1:93388277:T:G	ENSG00000223745	CCDC18-AS1	chr1:93339274:93339357:clu_27995_?:ENSG00000223745	T	G	42371	0.869792	21	25	4.9188e-13	1.31927	0.155654	1.69682e-13	9.37068e-07	1.43121e-05
1	93388629	1:93388629:C:G	ENSG00000117505	DR1	chr1:93346865:93353908:clu_28006_?:ENSG00000117505	G	C	42603	0.494792	65	95	4.7965e-06	-0.694521	0.142482	4.7965e-06	0.0252519	5.95215e-05
1	93388868	1:93388868:T:A	ENSG00000223745	CCDC18-AS1	chr1:93339274:93339357:clu_27995_?:ENSG00000223745	T	A	42962	0.807292	30	37	4.09893e-06	0.78387	0.159524	1.69682e-13	9.37068e-07	1.43121e-05
1	93389131	1:93389131:C:T	ENSG00000223745	CCDC18-AS1	chr1:93339274:93339357:clu_27995_?:ENSG00000223745	C	T	43225	0.869792	21	25	4.9188e-13	1.31927	0.155654	1.69682e-13	9.37068e-07	1.43121e-05
1	93389131	1:93389131:C:T	ENSG00000223745	CCDC18-AS1	chr1:93305470:93339357:clu_27995_?:ENSG00000223745	C	T	43225	0.869792	21	25	2.79633e-06	-0.670386	0.133839	1.69682e-13	9.37068e-07	1.43121e-05
1	93389437	1:93389437:G:A	ENSG00000117505	DR1	chr1:93346865:93353908:clu_28006_?:ENSG00000117505	A	G	43411	0.479167	64	92	4.31581e-05	-0.655951	0.152357	4.7965e-06	0.0252519	5.95215e-05
1	93390523	1:93390523:C:A	ENSG00000223745	CCDC18-AS1	chr1:93305470:93339357:clu_27995_?:ENSG00000223745	C	A	44617	0.869792	21	25	2.79633e-06	-0.670386	0.133839	1.69682e-13	9.37068e-07	1.43121e-05
1	93390523	1:93390523:C:A	ENSG00000223745	CCDC18-AS1	chr1:93339274:93339357:clu_27995_?:ENSG00000223745	C	A	44617	0.869792	21	25	4.9188e-13	1.31927	0.155654	1.69682e-13	9.37068e-07	1.43121e-05
1	93391858	1:93391858:C:T	ENSG00000223745	CCDC18-AS1	chr1:93339274:93339357:clu_27995_?:ENSG00000223745	C	T	45952	0.807292	30	37	4.09893e-06	0.78387	0.159524	1.69682e-13	9.37068e-07	1.43121e-05
1	93392165	1:93392165:T:C	ENSG00000223745	CCDC18-AS1	chr1:93305470:93339357:clu_27995_?:ENSG00000223745	T	C	46259	0.869792	21	25	2.79633e-06	-0.670386	0.133839	1.69682e-13	9.37068e-07	1.43121e-05
1	93392165	1:93392165:T:C	ENSG00000223745	CCDC18-AS1	chr1:93339274:93339357:clu_27995_?:ENSG00000223745	T	C	46259	0.869792	21	25	4.9188e-13	1.31927	0.155654	1.69682e-13	9.37068e-07	1.43121e-05
1	93392817	1:93392817:G:A	ENSG00000117505	DR1	chr1:93346865:93353908:clu_28006_?:ENSG00000117505	A	G	46791	0.494792	65	95	4.7965e-06	-0.694521	0.142482	4.7965e-06	0.0252519	5.95215e-05
1	93392835	1:93392835:G:A	ENSG00000223745	CCDC18-AS1	chr1:93339274:93339357:clu_27995_?:ENSG00000223745	G	A	46929	0.807292	30	37	4.09893e-06	0.78387	0.159524	1.69682e-13	9.37068e-07	1.43121e-05
1	93394149	1:93394149:T:C	ENSG00000223745	CCDC18-AS1	chr1:93339274:93339357:clu_27995_?:ENSG00000223745	T	C	48243	0.807292	30	37	4.09893e-06	0.78387	0.159524	1.69682e-13	9.37068e-07	1.43121e-05
1	93395068	1:93395068:G:A	ENSG00000117505	DR1	chr1:93346865:93353908:clu_28006_?:ENSG00000117505	A	G	49042	0.494792	65	95	4.7965e-06	-0.694521	0.142482	4.7965e-06	0.0252519	5.95215e-05
1	93395415	1:93395415:C:G	ENSG00000223745	CCDC18-AS1	chr1:93339274:93339357:clu_27995_?:ENSG00000223745	C	G	49509	0.807292	30	37	4.09893e-06	0.78387	0.159524	1.69682e-13	9.37068e-07	1.43121e-05
1	93395514	1:93395514:C:T	ENSG00000223745	CCDC18-AS1	chr1:93339274:93339357:clu_27995_?:ENSG00000223745	C	T	49608	0.807292	30	37	4.09893e-06	0.78387	0.159524	1.69682e-13	9.37068e-07	1.43121e-05
1	93396032	1:93396032:T:G	ENSG00000117505	DR1	chr1:93346865:93353908:clu_28006_?:ENSG00000117505	G	T	50006	0.494792	65	95	4.7965e-06	-0.694521	0.142482	4.7965e-06	0.0252519	5.95215e-05
1	93396254	1:93396254:A:G	ENSG00000223745	CCDC18-AS1	chr1:93339274:93339357:clu_27995_?:ENSG00000223745	A	G	50348	0.869792	21	25	4.9188e-13	1.31927	0.155654	1.69682e-13	9.37068e-07	1.43121e-05
1	93396254	1:93396254:A:G	ENSG00000223745	CCDC18-AS1	chr1:93305470:93339357:clu_27995_?:ENSG00000223745	A	G	50348	0.869792	21	25	2.79633e-06	-0.670386	0.133839	1.69682e-13	9.37068e-07	1.43121e-05
1	93396463	1:93396463:T:C	ENSG00000117505	DR1	chr1:93346865:93353908:clu_28006_?:ENSG00000117505	C	T	50437	0.494792	65	95	4.7965e-06	-0.694521	0.142482	4.7965e-06	0.0252519	5.95215e-05
1	93398340	1:93398340:T:G	ENSG00000223745	CCDC18-AS1	chr1:93339274:93339357:clu_27995_?:ENSG00000223745	T	G	52434	0.869792	21	25	4.9188e-13	1.31927	0.155654	1.69682e-13	9.37068e-07	1.43121e-05
1	93398340	1:93398340:T:G	ENSG00000223745	CCDC18-AS1	chr1:93305470:93339357:clu_27995_?:ENSG00000223745	T	G	52434	0.869792	21	25	2.79633e-06	-0.670386	0.133839	1.69682e-13	9.37068e-07	1.43121e-05
1	93399834	1:93399834:C:T	ENSG00000117505	DR1	chr1:93346865:93353908:clu_28006_?:ENSG00000117505	C	T	53808	0.53125	64	90	5.92968e-05	-0.732384	0.173565	4.7965e-06	0.0252519	5.95215e-05
1	93400663	1:93400663:A:G	ENSG00000223745	CCDC18-AS1	chr1:93339274:93339357:clu_27995_?:ENSG00000223745	G	A	54757	0.0833333	14	16	1.48955e-06	-1.12142	0.217176	1.69682e-13	9.37068e-07	1.43121e-05
1	93413172	1:93413172:C:T	ENSG00000223745	CCDC18-AS1	chr1:93339274:93339357:clu_27995_?:ENSG00000223745	T	C	67266	0.0989583	17	19	1.40407e-05	-1.0055	0.218541	1.69682e-13	9.37068e-07	1.43121e-05
1	93413469	1:93413469:G:A	ENSG00000223745	CCDC18-AS1	chr1:93339274:93339357:clu_27995_?:ENSG00000223745	A	G	67563	0.0989583	17	19	1.40407e-05	-1.0055	0.218541	1.69682e-13	9.37068e-07	1.43121e-05
1	93418590	1:93418590:G:T	ENSG00000223745	CCDC18-AS1	chr1:93339274:93339357:clu_27995_?:ENSG00000223745	T	G	72684	0.0833333	14	16	1.48955e-06	-1.12142	0.217176	1.69682e-13	9.37068e-07	1.43121e-05
1	93429926	1:93429926:G:T	ENSG00000223745	CCDC18-AS1	chr1:93339274:93339357:clu_27995_?:ENSG00000223745	T	G	84020	0.0625	10	12	9.47093e-08	-1.41416	0.243078	1.69682e-13	9.37068e-07	1.43121e-05
1	93441463	1:93441463:A:G	ENSG00000223745	CCDC18-AS1	chr1:93339274:93339357:clu_27995_?:ENSG00000223745	G	A	95557	0.0833333	14	16	1.48955e-06	-1.12142	0.217176	1.69682e-13	9.37068e-07	1.43121e-05
1	93442318	1:93442318:C:T	ENSG00000223745	CCDC18-AS1	chr1:93339274:93339357:clu_27995_?:ENSG00000223745	T	C	96412	0.0833333	14	16	1.48955e-06	-1.12142	0.217176	1.69682e-13	9.37068e-07	1.43121e-05
1	93445060	1:93445060:A:G	ENSG00000223745	CCDC18-AS1	chr1:93339274:93339357:clu_27995_?:ENSG00000223745	G	A	99154	0.0833333	14	16	1.48955e-06	-1.12142	0.217176	1.69682e-13	9.37068e-07	1.43121e-05
1	111223429	1:111223429:A:T	ENSG00000064886	CHI3L2	chr1:111241443:111243217:clu_28197_?:ENSG00000064886	T	A	22658	0.291667	43	56	1.22784e-06	0.397479	0.0762814	4.66688e-08	0.0321558	1.35876e-05
1	111223540	1:111223540:G:C	ENSG00000064886	CHI3L2	chr1:111241443:111243217:clu_28197_?:ENSG00000064886	C	G	22769	0.291667	43	56	1.22784e-06	0.397479	0.0762814	4.66688e-08	0.0321558	1.35876e-05
1	111225954	1:111225954:G:A	ENSG00000064886	CHI3L2	chr1:111241443:111243217:clu_28197_?:ENSG00000064886	A	G	25183	0.276042	41	53	6.5503e-07	0.418645	0.0780717	4.66688e-08	0.0321558	1.35876e-05
1	111226769	1:111226769:C:T	ENSG00000064886	CHI3L2	chr1:111241443:111243217:clu_28197_?:ENSG00000064886	T	C	25998	0.276042	41	53	6.5503e-07	0.418645	0.0780717	4.66688e-08	0.0321558	1.35876e-05
1	111229637	1:111229637:A:G	ENSG00000064886	CHI3L2	chr1:111241443:111243217:clu_28197_?:ENSG00000064886	G	A	28866	0.286458	43	55	1.38166e-06	0.407073	0.0785553	4.66688e-08	0.0321558	1.35876e-05
1	111229639	1:111229639:A:G	ENSG00000064886	CHI3L2	chr1:111241443:111243217:clu_28197_?:ENSG00000064886	G	A	28868	0.328125	48	63	4.49954e-06	0.386535	0.0790385	4.66688e-08	0.0321558	1.35876e-05
1	111229660	1:111229660:C:A	ENSG00000064886	CHI3L2	chr1:111238932:111241327:clu_28197_?:ENSG00000064886	A	C	28889	0.203125	30	39	5.84225e-06	0.457416	0.0948045	4.66688e-08	0.0321558	1.35876e-05
1	111229660	1:111229660:C:A	ENSG00000064886	CHI3L2	chr1:111241443:111243217:clu_28197_?:ENSG00000064886	A	C	28889	0.203125	30	39	1.13416e-07	0.511538	0.0885639	4.66688e-08	0.0321558	1.35876e-05
1	111233053	1:111233053:C:T	ENSG00000064886	CHI3L2	chr1:111241443:111243217:clu_28197_?:ENSG00000064886	T	C	32282	0.197917	29	38	8.88066e-08	0.515615	0.0884018	4.66688e-08	0.0321558	1.35876e-05
1	111233053	1:111233053:C:T	ENSG00000064886	CHI3L2	chr1:111238932:111241327:clu_28197_?:ENSG00000064886	T	C	32282	0.197917	29	38	4.49592e-06	0.462735	0.0946158	4.66688e-08	0.0321558	1.35876e-05
1	111233170	1:111233170:A:G	ENSG00000064886	CHI3L2	chr1:111241443:111243217:clu_28197_?:ENSG00000064886	G	A	32399	0.197917	29	38	8.88066e-08	0.515615	0.0884018	4.66688e-08	0.0321558	1.35876e-05
1	111233170	1:111233170:A:G	ENSG00000064886	CHI3L2	chr1:111238932:111241327:clu_28197_?:ENSG00000064886	G	A	32399	0.197917	29	38	4.49592e-06	0.462735	0.0946158	4.66688e-08	0.0321558	1.35876e-05
1	111236476	1:111236476:T:G	ENSG00000064886	CHI3L2	chr1:111241443:111243217:clu_28197_?:ENSG00000064886	G	T	35705	0.192708	28	37	7.50945e-08	0.519501	0.0884801	4.66688e-08	0.0321558	1.35876e-05
1	111236476	1:111236476:T:G	ENSG00000064886	CHI3L2	chr1:111238932:111241327:clu_28197_?:ENSG00000064886	G	T	35705	0.192708	28	37	3.69455e-06	0.467652	0.0946717	4.66688e-08	0.0321558	1.35876e-05
1	111237142	1:111237142:A:T	ENSG00000064886	CHI3L2	chr1:111241443:111243217:clu_28197_?:ENSG00000064886	T	A	36371	0.192708	28	37	7.50945e-08	0.519501	0.0884801	4.66688e-08	0.0321558	1.35876e-05
1	111237142	1:111237142:A:T	ENSG00000064886	CHI3L2	chr1:111238932:111241327:clu_28197_?:ENSG00000064886	T	A	36371	0.192708	28	37	3.69455e-06	0.467652	0.0946717	4.66688e-08	0.0321558	1.35876e-05
1	111237712	1:111237712:C:T	ENSG00000064886	CHI3L2	chr1:111241443:111243217:clu_28197_?:ENSG00000064886	T	C	36941	0.192708	28	37	7.50945e-08	0.519501	0.0884801	4.66688e-08	0.0321558	1.35876e-05
1	111237712	1:111237712:C:T	ENSG00000064886	CHI3L2	chr1:111238932:111241327:clu_28197_?:ENSG00000064886	T	C	36941	0.192708	28	37	3.69455e-06	0.467652	0.0946717	4.66688e-08	0.0321558	1.35876e-05
1	111240649	1:111240649:G:A	ENSG00000064886	CHI3L2	chr1:111238932:111241327:clu_28197_?:ENSG00000064886	A	G	39878	0.213542	32	41	9.94451e-07	0.469799	0.0892849	4.66688e-08	0.0321558	1.35876e-05
1	111240649	1:111240649:G:A	ENSG00000064886	CHI3L2	chr1:111241443:111243217:clu_28197_?:ENSG00000064886	A	G	39878	0.213542	32	41	4.66688e-08	0.503653	0.0842118	4.66688e-08	0.0321558	1.35876e-05
1	111240819	1:111240819:G:A	ENSG00000064886	CHI3L2	chr1:111241443:111243217:clu_28197_?:ENSG00000064886	A	G	40048	0.192708	28	37	7.50945e-08	0.519501	0.0884801	4.66688e-08	0.0321558	1.35876e-05
1	111240819	1:111240819:G:A	ENSG00000064886	CHI3L2	chr1:111238932:111241327:clu_28197_?:ENSG00000064886	A	G	40048	0.192708	28	37	3.69455e-06	0.467652	0.0946717	4.66688e-08	0.0321558	1.35876e-05
1	111241360	1:111241360:C:A	ENSG00000064886	CHI3L2	chr1:111238932:111241327:clu_28197_?:ENSG00000064886	A	C	40589	0.192708	28	37	3.69455e-06	0.467652	0.0946717	4.66688e-08	0.0321558	1.35876e-05
1	111241360	1:111241360:C:A	ENSG00000064886	CHI3L2	chr1:111241443:111243217:clu_28197_?:ENSG00000064886	A	C	40589	0.192708	28	37	7.50945e-08	0.519501	0.0884801	4.66688e-08	0.0321558	1.35876e-05
1	111241516	1:111241516:T:C	ENSG00000064886	CHI3L2	chr1:111241443:111243217:clu_28197_?:ENSG00000064886	C	T	40745	0.192708	28	37	7.50945e-08	0.519501	0.0884801	4.66688e-08	0.0321558	1.35876e-05
1	111241516	1:111241516:T:C	ENSG00000064886	CHI3L2	chr1:111238932:111241327:clu_28197_?:ENSG00000064886	C	T	40745	0.192708	28	37	3.69455e-06	0.467652	0.0946717	4.66688e-08	0.0321558	1.35876e-05
1	111241536	1:111241536:T:C	ENSG00000064886	CHI3L2	chr1:111238932:111241327:clu_28197_?:ENSG00000064886	C	T	40765	0.192708	28	37	3.69455e-06	0.467652	0.0946717	4.66688e-08	0.0321558	1.35876e-05
1	111241536	1:111241536:T:C	ENSG00000064886	CHI3L2	chr1:111241443:111243217:clu_28197_?:ENSG00000064886	C	T	40765	0.192708	28	37	7.50945e-08	0.519501	0.0884801	4.66688e-08	0.0321558	1.35876e-05
1	111241605	1:111241605:C:T	ENSG00000064886	CHI3L2	chr1:111241443:111243217:clu_28197_?:ENSG00000064886	T	C	40834	0.192708	28	37	7.50945e-08	0.519501	0.0884801	4.66688e-08	0.0321558	1.35876e-05
1	111241605	1:111241605:C:T	ENSG00000064886	CHI3L2	chr1:111238932:111241327:clu_28197_?:ENSG00000064886	T	C	40834	0.192708	28	37	3.69455e-06	0.467652	0.0946717	4.66688e-08	0.0321558	1.35876e-05
1	111241727	1:111241727:A:G	ENSG00000064886	CHI3L2	chr1:111241443:111243217:clu_28197_?:ENSG00000064886	G	A	40956	0.192708	28	37	7.50945e-08	0.519501	0.0884801	4.66688e-08	0.0321558	1.35876e-05
1	111241727	1:111241727:A:G	ENSG00000064886	CHI3L2	chr1:111238932:111241327:clu_28197_?:ENSG00000064886	G	A	40956	0.192708	28	37	3.69455e-06	0.467652	0.0946717	4.66688e-08	0.0321558	1.35876e-05
1	111241783	1:111241783:G:A	ENSG00000064886	CHI3L2	chr1:111238932:111241327:clu_28197_?:ENSG00000064886	A	G	41012	0.192708	28	37	3.69455e-06	0.467652	0.0946717	4.66688e-08	0.0321558	1.35876e-05
1	111241783	1:111241783:G:A	ENSG00000064886	CHI3L2	chr1:111241443:111243217:clu_28197_?:ENSG00000064886	A	G	41012	0.192708	28	37	7.50945e-08	0.519501	0.0884801	4.66688e-08	0.0321558	1.35876e-05
1	111241887	1:111241887:T:G	ENSG00000064886	CHI3L2	chr1:111238932:111241327:clu_28197_?:ENSG00000064886	G	T	41116	0.192708	28	37	3.69455e-06	0.467652	0.0946717	4.66688e-08	0.0321558	1.35876e-05
1	111241887	1:111241887:T:G	ENSG00000064886	CHI3L2	chr1:111241443:111243217:clu_28197_?:ENSG00000064886	G	T	41116	0.192708	28	37	7.50945e-08	0.519501	0.0884801	4.66688e-08	0.0321558	1.35876e-05
1	111241888	1:111241888:G:C	ENSG00000064886	CHI3L2	chr1:111238932:111241327:clu_28197_?:ENSG00000064886	C	G	41117	0.192708	28	37	3.69455e-06	0.467652	0.0946717	4.66688e-08	0.0321558	1.35876e-05
1	111241888	1:111241888:G:C	ENSG00000064886	CHI3L2	chr1:111241443:111243217:clu_28197_?:ENSG00000064886	C	G	41117	0.192708	28	37	7.50945e-08	0.519501	0.0884801	4.66688e-08	0.0321558	1.35876e-05
1	111241894	1:111241894:A:G	ENSG00000064886	CHI3L2	chr1:111241443:111243217:clu_28197_?:ENSG00000064886	G	A	41123	0.192708	28	37	7.50945e-08	0.519501	0.0884801	4.66688e-08	0.0321558	1.35876e-05
1	111241894	1:111241894:A:G	ENSG00000064886	CHI3L2	chr1:111238932:111241327:clu_28197_?:ENSG00000064886	G	A	41123	0.192708	28	37	3.69455e-06	0.467652	0.0946717	4.66688e-08	0.0321558	1.35876e-05
1	111241895	1:111241895:A:G	ENSG00000064886	CHI3L2	chr1:111241443:111243217:clu_28197_?:ENSG00000064886	G	A	41124	0.192708	28	37	7.50945e-08	0.519501	0.0884801	4.66688e-08	0.0321558	1.35876e-05
1	111241895	1:111241895:A:G	ENSG00000064886	CHI3L2	chr1:111238932:111241327:clu_28197_?:ENSG00000064886	G	A	41124	0.192708	28	37	3.69455e-06	0.467652	0.0946717	4.66688e-08	0.0321558	1.35876e-05
1	111242845	1:111242845:C:T	ENSG00000064886	CHI3L2	chr1:111238932:111241327:clu_28197_?:ENSG00000064886	T	C	42074	0.213542	32	41	9.94451e-07	0.469799	0.0892849	4.66688e-08	0.0321558	1.35876e-05
1	111242845	1:111242845:C:T	ENSG00000064886	CHI3L2	chr1:111241443:111243217:clu_28197_?:ENSG00000064886	T	C	42074	0.213542	32	41	4.66688e-08	0.503653	0.0842118	4.66688e-08	0.0321558	1.35876e-05
1	111243390	1:111243390:T:A	ENSG00000064886	CHI3L2	chr1:111241443:111243217:clu_28197_?:ENSG00000064886	A	T	42619	0.192708	28	37	7.50945e-08	0.519501	0.0884801	4.66688e-08	0.0321558	1.35876e-05
1	111243390	1:111243390:T:A	ENSG00000064886	CHI3L2	chr1:111238932:111241327:clu_28197_?:ENSG00000064886	A	T	42619	0.192708	28	37	3.69455e-06	0.467652	0.0946717	4.66688e-08	0.0321558	1.35876e-05
1	111243606	1:111243606:A:G	ENSG00000064886	CHI3L2	chr1:111241443:111243217:clu_28197_?:ENSG00000064886	G	A	42835	0.192708	28	37	7.50945e-08	0.519501	0.0884801	4.66688e-08	0.0321558	1.35876e-05
1	111243606	1:111243606:A:G	ENSG00000064886	CHI3L2	chr1:111238932:111241327:clu_28197_?:ENSG00000064886	G	A	42835	0.192708	28	37	3.69455e-06	0.467652	0.0946717	4.66688e-08	0.0321558	1.35876e-05
1	111243987	1:111243987:G:A	ENSG00000064886	CHI3L2	chr1:111238932:111241327:clu_28197_?:ENSG00000064886	A	G	43216	0.192708	28	37	3.69455e-06	0.467652	0.0946717	4.66688e-08	0.0321558	1.35876e-05
1	111243987	1:111243987:G:A	ENSG00000064886	CHI3L2	chr1:111241443:111243217:clu_28197_?:ENSG00000064886	A	G	43216	0.192708	28	37	7.50945e-08	0.519501	0.0884801	4.66688e-08	0.0321558	1.35876e-05
1	111245692	1:111245692:C:T	ENSG00000064886	CHI3L2	chr1:111241443:111243217:clu_28197_?:ENSG00000064886	T	C	44921	0.192708	28	37	7.50945e-08	0.519501	0.0884801	4.66688e-08	0.0321558	1.35876e-05
1	111245692	1:111245692:C:T	ENSG00000064886	CHI3L2	chr1:111238932:111241327:clu_28197_?:ENSG00000064886	T	C	44921	0.192708	28	37	3.69455e-06	0.467652	0.0946717	4.66688e-08	0.0321558	1.35876e-05
1	111248181	1:111248181:T:G	ENSG00000064886	CHI3L2	chr1:111241443:111243217:clu_28197_?:ENSG00000064886	T	G	47410	0.770833	35	44	6.7201e-07	-0.450798	0.0841641	4.66688e-08	0.0321558	1.35876e-05
1	111248456	1:111248456:T:C	ENSG00000064886	CHI3L2	chr1:111241443:111243217:clu_28197_?:ENSG00000064886	T	C	47685	0.734375	39	51	2.64274e-07	-0.423481	0.0759195	4.66688e-08	0.0321558	1.35876e-05
1	111248569	1:111248569:T:G	ENSG00000064886	CHI3L2	chr1:111241443:111243217:clu_28197_?:ENSG00000064886	T	G	47798	0.729167	40	52	2.76413e-07	-0.421428	0.0756951	4.66688e-08	0.0321558	1.35876e-05
1	111248881	1:111248881:G:C	ENSG00000064886	CHI3L2	chr1:111241443:111243217:clu_28197_?:ENSG00000064886	G	C	48110	0.713542	42	55	1.24467e-07	-0.430365	0.0747901	4.66688e-08	0.0321558	1.35876e-05
1	111249022	1:111249022:T:C	ENSG00000064886	CHI3L2	chr1:111241443:111243217:clu_28197_?:ENSG00000064886	T	C	48251	0.765625	36	45	6.78185e-07	-0.449475	0.0839516	4.66688e-08	0.0321558	1.35876e-05
1	111249642	1:111249642:G:A	ENSG00000064886	CHI3L2	chr1:111241443:111243217:clu_28197_?:ENSG00000064886	G	A	48871	0.765625	36	45	6.78185e-07	-0.449475	0.0839516	4.66688e-08	0.0321558	1.35876e-05
1	111252111	1:111252111:G:A	ENSG00000064886	CHI3L2	chr1:111241443:111243217:clu_28197_?:ENSG00000064886	G	A	51340	0.588542	58	79	9.12651e-06	-0.352616	0.0748394	4.66688e-08	0.0321558	1.35876e-05
1	111252189	1:111252189:A:T	ENSG00000064886	CHI3L2	chr1:111241443:111243217:clu_28197_?:ENSG00000064886	A	T	51418	0.588542	58	79	9.12651e-06	-0.352616	0.0748394	4.66688e-08	0.0321558	1.35876e-05
1	111252192	1:111252192:G:A	ENSG00000064886	CHI3L2	chr1:111241443:111243217:clu_28197_?:ENSG00000064886	G	A	51421	0.588542	58	79	9.12651e-06	-0.352616	0.0748394	4.66688e-08	0.0321558	1.35876e-05
1	111252452	1:111252452:A:G	ENSG00000064886	CHI3L2	chr1:111241443:111243217:clu_28197_?:ENSG00000064886	A	G	51681	0.588542	58	79	9.12651e-06	-0.352616	0.0748394	4.66688e-08	0.0321558	1.35876e-05
1	111252858	1:111252858:C:A	ENSG00000064886	CHI3L2	chr1:111241443:111243217:clu_28197_?:ENSG00000064886	C	A	52087	0.588542	58	79	9.12651e-06	-0.352616	0.0748394	4.66688e-08	0.0321558	1.35876e-05
1	111253061	1:111253061:G:A	ENSG00000064886	CHI3L2	chr1:111241443:111243217:clu_28197_?:ENSG00000064886	G	A	52290	0.588542	58	79	9.12651e-06	-0.352616	0.0748394	4.66688e-08	0.0321558	1.35876e-05
1	111253121	1:111253121:G:A	ENSG00000064886	CHI3L2	chr1:111241443:111243217:clu_28197_?:ENSG00000064886	G	A	52350	0.588542	58	79	9.12651e-06	-0.352616	0.0748394	4.66688e-08	0.0321558	1.35876e-05
1	111253139	1:111253139:C:T	ENSG00000064886	CHI3L2	chr1:111241443:111243217:clu_28197_?:ENSG00000064886	C	T	52368	0.588542	58	79	9.12651e-06	-0.352616	0.0748394	4.66688e-08	0.0321558	1.35876e-05
1	111253143	1:111253143:C:T	ENSG00000064886	CHI3L2	chr1:111241443:111243217:clu_28197_?:ENSG00000064886	C	T	52372	0.588542	58	79	9.12651e-06	-0.352616	0.0748394	4.66688e-08	0.0321558	1.35876e-05
1	111253144	1:111253144:A:G	ENSG00000064886	CHI3L2	chr1:111241443:111243217:clu_28197_?:ENSG00000064886	A	G	52373	0.588542	58	79	9.12651e-06	-0.352616	0.0748394	4.66688e-08	0.0321558	1.35876e-05
1	111253581	1:111253581:A:G	ENSG00000064886	CHI3L2	chr1:111241443:111243217:clu_28197_?:ENSG00000064886	A	G	52810	0.588542	58	79	9.12651e-06	-0.352616	0.0748394	4.66688e-08	0.0321558	1.35876e-05
1	111253644	1:111253644:G:A	ENSG00000064886	CHI3L2	chr1:111241443:111243217:clu_28197_?:ENSG00000064886	G	A	52873	0.588542	58	79	9.12651e-06	-0.352616	0.0748394	4.66688e-08	0.0321558	1.35876e-05
1	111253917	1:111253917:T:C	ENSG00000064886	CHI3L2	chr1:111241443:111243217:clu_28197_?:ENSG00000064886	T	C	53146	0.588542	58	79	9.12651e-06	-0.352616	0.0748394	4.66688e-08	0.0321558	1.35876e-05
1	111254005	1:111254005:C:A	ENSG00000064886	CHI3L2	chr1:111241443:111243217:clu_28197_?:ENSG00000064886	C	A	53234	0.588542	58	79	9.12651e-06	-0.352616	0.0748394	4.66688e-08	0.0321558	1.35876e-05
1	111254044	1:111254044:G:A	ENSG00000064886	CHI3L2	chr1:111241443:111243217:clu_28197_?:ENSG00000064886	G	A	53273	0.588542	58	79	9.12651e-06	-0.352616	0.0748394	4.66688e-08	0.0321558	1.35876e-05
1	111254182	1:111254182:T:G	ENSG00000064886	CHI3L2	chr1:111241443:111243217:clu_28197_?:ENSG00000064886	T	G	53411	0.588542	58	79	9.12651e-06	-0.352616	0.0748394	4.66688e-08	0.0321558	1.35876e-05
1	112534134	1:112534134:T:C	ENSG00000007341	ST7L	chr1:112526111:112541951:clu_28224_?:ENSG00000007341	T	C	-86691	0.59375	63	78	3.51662e-07	0.905402	0.164304	6.43594e-08	0.00312123	2.29777e-05
1	112538554	1:112538554:G:A	ENSG00000007341	ST7L	chr1:112526111:112541951:clu_28224_?:ENSG00000007341	G	A	-82271	0.645833	56	68	9.71982e-06	0.838975	0.178675	6.43594e-08	0.00312123	2.29777e-05
1	112540817	1:112540817:C:T	ENSG00000007341	ST7L	chr1:112526111:112541951:clu_28224_?:ENSG00000007341	C	T	-80008	0.588542	63	79	6.61966e-07	0.876203	0.163477	6.43594e-08	0.00312123	2.29777e-05
1	112546384	1:112546384:C:T	ENSG00000007341	ST7L	chr1:112526111:112541951:clu_28224_?:ENSG00000007341	C	T	-74441	0.578125	65	81	6.96693e-08	0.959237	0.162895	6.43594e-08	0.00312123	2.29777e-05
1	112546698	1:112546698:A:T	ENSG00000007341	ST7L	chr1:112526111:112541951:clu_28224_?:ENSG00000007341	A	T	-74127	0.578125	65	81	6.96693e-08	0.959237	0.162895	6.43594e-08	0.00312123	2.29777e-05
1	112548865	1:112548865:C:T	ENSG00000007341	ST7L	chr1:112526111:112541951:clu_28224_?:ENSG00000007341	C	T	-71960	0.578125	65	81	6.96693e-08	0.959237	0.162895	6.43594e-08	0.00312123	2.29777e-05
1	112549905	1:112549905:A:G	ENSG00000007341	ST7L	chr1:112526111:112541951:clu_28224_?:ENSG00000007341	A	G	-70920	0.578125	65	81	6.96693e-08	0.959237	0.162895	6.43594e-08	0.00312123	2.29777e-05
1	112555384	1:112555384:G:T	ENSG00000007341	ST7L	chr1:112526111:112541951:clu_28224_?:ENSG00000007341	G	T	-65441	0.578125	65	81	6.96693e-08	0.959237	0.162895	6.43594e-08	0.00312123	2.29777e-05
1	112555393	1:112555393:A:G	ENSG00000007341	ST7L	chr1:112526111:112541951:clu_28224_?:ENSG00000007341	A	G	-65432	0.578125	65	81	6.96693e-08	0.959237	0.162895	6.43594e-08	0.00312123	2.29777e-05
1	112563747	1:112563747:A:G	ENSG00000007341	ST7L	chr1:112526111:112541951:clu_28224_?:ENSG00000007341	A	G	-57078	0.578125	65	81	6.96693e-08	0.959237	0.162895	6.43594e-08	0.00312123	2.29777e-05
1	112566652	1:112566652:T:C	ENSG00000007341	ST7L	chr1:112526111:112541951:clu_28224_?:ENSG00000007341	T	C	-54173	0.578125	65	81	6.96693e-08	0.959237	0.162895	6.43594e-08	0.00312123	2.29777e-05
1	112567997	1:112567997:T:C	ENSG00000007341	ST7L	chr1:112526111:112541951:clu_28224_?:ENSG00000007341	T	C	-52828	0.578125	65	81	6.96693e-08	0.959237	0.162895	6.43594e-08	0.00312123	2.29777e-05
1	112570124	1:112570124:G:A	ENSG00000007341	ST7L	chr1:112526111:112541951:clu_28224_?:ENSG00000007341	G	A	-50701	0.578125	65	81	6.96693e-08	0.959237	0.162895	6.43594e-08	0.00312123	2.29777e-05
1	112579051	1:112579051:G:C	ENSG00000007341	ST7L	chr1:112526111:112541951:clu_28224_?:ENSG00000007341	G	C	-41774	0.635417	58	70	1.51261e-06	0.919533	0.178207	6.43594e-08	0.00312123	2.29777e-05
1	112580334	1:112580334:T:G	ENSG00000007341	ST7L	chr1:112526111:112541951:clu_28224_?:ENSG00000007341	T	G	-40491	0.578125	65	81	6.96693e-08	0.959237	0.162895	6.43594e-08	0.00312123	2.29777e-05
1	112581112	1:112581112:A:C	ENSG00000007341	ST7L	chr1:112526111:112541951:clu_28224_?:ENSG00000007341	A	C	-39713	0.578125	65	81	6.96693e-08	0.959237	0.162895	6.43594e-08	0.00312123	2.29777e-05
1	112589739	1:112589739:T:C	ENSG00000007341	ST7L	chr1:112526111:112541951:clu_28224_?:ENSG00000007341	T	C	-31086	0.578125	65	81	6.96693e-08	0.959237	0.162895	6.43594e-08	0.00312123	2.29777e-05
1	112589771	1:112589771:A:G	ENSG00000007341	ST7L	chr1:112526111:112541951:clu_28224_?:ENSG00000007341	A	G	-31054	0.578125	65	81	6.96693e-08	0.959237	0.162895	6.43594e-08	0.00312123	2.29777e-05
1	112593607	1:112593607:T:C	ENSG00000007341	ST7L	chr1:112526111:112541951:clu_28224_?:ENSG00000007341	T	C	-27218	0.578125	65	81	6.96693e-08	0.959237	0.162895	6.43594e-08	0.00312123	2.29777e-05
1	112598304	1:112598304:C:T	ENSG00000007341	ST7L	chr1:112526111:112541951:clu_28224_?:ENSG00000007341	C	T	-22521	0.635417	58	70	1.51261e-06	0.919533	0.178207	6.43594e-08	0.00312123	2.29777e-05
1	112601641	1:112601641:T:C	ENSG00000007341	ST7L	chr1:112526111:112541951:clu_28224_?:ENSG00000007341	T	C	-19184	0.583333	65	80	7.70769e-08	0.977624	0.166677	6.43594e-08	0.00312123	2.29777e-05
1	112602772	1:112602772:A:G	ENSG00000007341	ST7L	chr1:112526111:112541951:clu_28224_?:ENSG00000007341	A	G	-18053	0.578125	65	81	6.96693e-08	0.959237	0.162895	6.43594e-08	0.00312123	2.29777e-05
1	112611778	1:112611778:C:T	ENSG00000007341	ST7L	chr1:112526111:112541951:clu_28224_?:ENSG00000007341	C	T	-9047	0.583333	65	80	7.70769e-08	0.977624	0.166677	6.43594e-08	0.00312123	2.29777e-05
1	112613804	1:112613804:C:T	ENSG00000007341	ST7L	chr1:112526111:112541951:clu_28224_?:ENSG00000007341	C	T	-7021	0.583333	65	80	7.70769e-08	0.977624	0.166677	6.43594e-08	0.00312123	2.29777e-05
1	112614432	1:112614432:C:T	ENSG00000007341	ST7L	chr1:112526111:112541951:clu_28224_?:ENSG00000007341	C	T	-6393	0.583333	65	80	7.70769e-08	0.977624	0.166677	6.43594e-08	0.00312123	2.29777e-05
1	112614750	1:112614750:T:C	ENSG00000007341	ST7L	chr1:112526111:112541951:clu_28224_?:ENSG00000007341	T	C	-6075	0.640625	57	69	3.22797e-06	0.893984	0.179756	6.43594e-08	0.00312123	2.29777e-05
1	112626827	1:112626827:G:A	ENSG00000007341	ST7L	chr1:112526111:112541951:clu_28224_?:ENSG00000007341	A	G	6002	0.421875	66	81	1.28153e-07	-0.97495	0.16963	6.43594e-08	0.00312123	2.29777e-05
1	112628967	1:112628967:C:T	ENSG00000007341	ST7L	chr1:112526111:112541951:clu_28224_?:ENSG00000007341	T	C	8142	0.359375	57	69	3.22797e-06	-0.893984	0.179756	6.43594e-08	0.00312123	2.29777e-05
1	112653167	1:112653167:G:A	ENSG00000007341	ST7L	chr1:112526111:112541951:clu_28224_?:ENSG00000007341	A	G	32342	0.421875	66	81	1.28153e-07	-0.97495	0.16963	6.43594e-08	0.00312123	2.29777e-05
1	112653575	1:112653575:A:T	ENSG00000007341	ST7L	chr1:112526111:112541951:clu_28224_?:ENSG00000007341	T	A	32750	0.5	73	96	3.78082e-07	-0.911054	0.165847	6.43594e-08	0.00312123	2.29777e-05
1	112655108	1:112655108:G:A	ENSG00000007341	ST7L	chr1:112526111:112541951:clu_28224_?:ENSG00000007341	A	G	34283	0.421875	66	81	1.28153e-07	-0.97495	0.16963	6.43594e-08	0.00312123	2.29777e-05
1	112655178	1:112655178:A:G	ENSG00000007341	ST7L	chr1:112526111:112541951:clu_28224_?:ENSG00000007341	G	A	34353	0.421875	66	81	1.28153e-07	-0.97495	0.16963	6.43594e-08	0.00312123	2.29777e-05
1	112658049	1:112658049:T:G	ENSG00000007341	ST7L	chr1:112526111:112541951:clu_28224_?:ENSG00000007341	G	T	37224	0.421875	66	81	1.28153e-07	-0.97495	0.16963	6.43594e-08	0.00312123	2.29777e-05
1	112659586	1:112659586:C:T	ENSG00000007341	ST7L	chr1:112526111:112541951:clu_28224_?:ENSG00000007341	C	T	38761	0.510417	70	94	1.58937e-06	-0.867877	0.168591	6.43594e-08	0.00312123	2.29777e-05
1	112659795	1:112659795:G:A	ENSG00000007341	ST7L	chr1:112526111:112541951:clu_28224_?:ENSG00000007341	A	G	38970	0.421875	66	81	1.28153e-07	-0.97495	0.16963	6.43594e-08	0.00312123	2.29777e-05
1	112664909	1:112664909:T:C	ENSG00000007341	ST7L	chr1:112526111:112541951:clu_28224_?:ENSG00000007341	C	T	44084	0.421875	66	81	1.28153e-07	-0.97495	0.16963	6.43594e-08	0.00312123	2.29777e-05
1	112665417	1:112665417:T:C	ENSG00000007341	ST7L	chr1:112526111:112541951:clu_28224_?:ENSG00000007341	C	T	44592	0.421875	66	81	1.28153e-07	-0.97495	0.16963	6.43594e-08	0.00312123	2.29777e-05
1	112679036	1:112679036:G:A	ENSG00000007341	ST7L	chr1:112526111:112541951:clu_28224_?:ENSG00000007341	A	G	58211	0.411458	65	79	6.43593e-08	-0.995275	0.168492	6.43594e-08	0.00312123	2.29777e-05
1	112679834	1:112679834:G:T	ENSG00000007341	ST7L	chr1:112526111:112541951:clu_28224_?:ENSG00000007341	T	G	59009	0.411458	65	79	6.43593e-08	-0.995275	0.168492	6.43594e-08	0.00312123	2.29777e-05
1	112680472	1:112680472:C:T	ENSG00000007341	ST7L	chr1:112526111:112541951:clu_28224_?:ENSG00000007341	T	C	59647	0.411458	65	79	6.43593e-08	-0.995275	0.168492	6.43594e-08	0.00312123	2.29777e-05
1	112690571	1:112690571:G:A	ENSG00000007341	ST7L	chr1:112526111:112541951:clu_28224_?:ENSG00000007341	A	G	69746	0.411458	65	79	6.43593e-08	-0.995275	0.168492	6.43594e-08	0.00312123	2.29777e-05
1	112691834	1:112691834:G:A	ENSG00000007341	ST7L	chr1:112526111:112541951:clu_28224_?:ENSG00000007341	A	G	71009	0.411458	65	79	6.43593e-08	-0.995275	0.168492	6.43594e-08	0.00312123	2.29777e-05
1	112693465	1:112693465:C:T	ENSG00000007341	ST7L	chr1:112526111:112541951:clu_28224_?:ENSG00000007341	T	C	72640	0.411458	65	79	6.43593e-08	-0.995275	0.168492	6.43594e-08	0.00312123	2.29777e-05
1	112693799	1:112693799:G:A	ENSG00000007341	ST7L	chr1:112526111:112541951:clu_28224_?:ENSG00000007341	A	G	72974	0.348958	56	67	1.41048e-06	-0.931039	0.179843	6.43594e-08	0.00312123	2.29777e-05
1	112699866	1:112699866:C:T	ENSG00000007341	ST7L	chr1:112526111:112541951:clu_28224_?:ENSG00000007341	T	C	79041	0.442708	67	85	4.29361e-06	-0.832211	0.169763	6.43594e-08	0.00312123	2.29777e-05
1	116490008	1:116490008:C:T	ENSG00000116815	CD58	chr1:116521983:116544311:clu_28324_?:ENSG00000116815	T	C	-81031	0.0885417	15	17	2.17913e-11	1.43838	0.187541	2.63381e-19	3.90595e-10	1.09282e-05
1	116492238	1:116492238:G:C	ENSG00000116815	CD58	chr1:116521983:116535965:clu_28324_?:ENSG00000116815	C	G	-78801	0.0989583	17	19	7.60494e-06	-1.01356	0.213018	2.63381e-19	3.90595e-10	1.09282e-05
1	116492238	1:116492238:G:C	ENSG00000116815	CD58	chr1:116521983:116544311:clu_28324_?:ENSG00000116815	C	G	-78801	0.0989583	17	19	2.26345e-12	1.44466	0.177209	2.63381e-19	3.90595e-10	1.09282e-05
1	116494556	1:116494556:G:A	ENSG00000116815	CD58	chr1:116521983:116544311:clu_28324_?:ENSG00000116815	A	G	-76483	0.0729167	13	14	6.21492e-08	1.43586	0.242749	2.63381e-19	3.90595e-10	1.09282e-05
1	116517087	1:116517087:A:G	ENSG00000116815	CD58	chr1:116521983:116544311:clu_28324_?:ENSG00000116815	G	A	-53952	0.104167	18	20	8.82619e-19	1.65218	0.146455	2.63381e-19	3.90595e-10	1.09282e-05
1	116517087	1:116517087:A:G	ENSG00000116815	CD58	chr1:116521983:116535965:clu_28324_?:ENSG00000116815	G	A	-53952	0.104167	18	20	6.00988e-07	-1.08803	0.202125	2.63381e-19	3.90595e-10	1.09282e-05
1	116526049	1:116526049:G:T	ENSG00000116815	CD58	chr1:116521983:116544311:clu_28324_?:ENSG00000116815	T	G	-44990	0.0729167	13	14	1.44801e-09	1.61595	0.23905	2.63381e-19	3.90595e-10	1.09282e-05
1	116531627	1:116531627:G:C	ENSG00000116815	CD58	chr1:116521983:116544311:clu_28324_?:ENSG00000116815	C	G	-39412	0.0729167	13	14	1.44801e-09	1.61595	0.23905	2.63381e-19	3.90595e-10	1.09282e-05
1	116536107	1:116536107:A:G	ENSG00000116815	CD58	chr1:116521983:116535965:clu_28324_?:ENSG00000116815	G	A	-34932	0.0989583	17	19	3.40765e-06	-1.03071	0.20781	2.63381e-19	3.90595e-10	1.09282e-05
1	116536107	1:116536107:A:G	ENSG00000116815	CD58	chr1:116521983:116544311:clu_28324_?:ENSG00000116815	G	A	-34932	0.0989583	17	19	2.6338e-19	1.68201	0.14573	2.63381e-19	3.90595e-10	1.09282e-05
1	119102912	1:119102912:C:T	ENSG00000231365	WARS2-AS1	chr1:119147069:119149394:clu_28354_?:ENSG00000231365	C	T	-37547	0.520833	68	92	2.64832e-06	0.848983	0.169041	6.43606e-08	0.00275064	2.75692e-05
1	119102912	1:119102912:C:T	ENSG00000231365	WARS2-AS1	chr1:119147069:119150565:clu_28354_?:ENSG00000231365	C	T	-37547	0.520833	68	92	3.29077e-06	-0.867745	0.174648	6.43606e-08	0.00275064	2.75692e-05
1	119105323	1:119105323:C:G	ENSG00000231365	WARS2-AS1	chr1:119147069:119150565:clu_28354_?:ENSG00000231365	C	G	-35136	0.520833	68	92	3.29077e-06	-0.867745	0.174648	6.43606e-08	0.00275064	2.75692e-05
1	119105323	1:119105323:C:G	ENSG00000231365	WARS2-AS1	chr1:119147069:119149394:clu_28354_?:ENSG00000231365	C	G	-35136	0.520833	68	92	2.64832e-06	0.848983	0.169041	6.43606e-08	0.00275064	2.75692e-05
1	119106033	1:119106033:T:C	ENSG00000231365	WARS2-AS1	chr1:119147069:119149394:clu_28354_?:ENSG00000231365	T	C	-34426	0.541667	66	88	2.24698e-06	0.838433	0.165603	6.43606e-08	0.00275064	2.75692e-05
1	119106033	1:119106033:T:C	ENSG00000231365	WARS2-AS1	chr1:119147069:119150565:clu_28354_?:ENSG00000231365	T	C	-34426	0.541667	66	88	1.86744e-06	-0.870178	0.170344	6.43606e-08	0.00275064	2.75692e-05
1	119108305	1:119108305:A:C	ENSG00000231365	WARS2-AS1	chr1:119147069:119150565:clu_28354_?:ENSG00000231365	A	C	-32154	0.510417	69	94	3.2447e-06	-0.845359	0.170023	6.43606e-08	0.00275064	2.75692e-05
1	119108305	1:119108305:A:C	ENSG00000231365	WARS2-AS1	chr1:119147069:119149394:clu_28354_?:ENSG00000231365	A	C	-32154	0.510417	69	94	2.34888e-06	0.830408	0.164373	6.43606e-08	0.00275064	2.75692e-05
1	119108308	1:119108308:A:T	ENSG00000231365	WARS2-AS1	chr1:119147069:119150565:clu_28354_?:ENSG00000231365	A	T	-32151	0.526042	67	91	1.36074e-06	-0.880662	0.169825	6.43606e-08	0.00275064	2.75692e-05
1	119108308	1:119108308:A:T	ENSG00000231365	WARS2-AS1	chr1:119147069:119149394:clu_28354_?:ENSG00000231365	A	T	-32151	0.526042	67	91	1.1203e-06	0.86036	0.164412	6.43606e-08	0.00275064	2.75692e-05
1	119113274	1:119113274:A:C	ENSG00000231365	WARS2-AS1	chr1:119147069:119149394:clu_28354_?:ENSG00000231365	A	C	-27185	0.552083	65	86	2.32033e-06	0.863128	0.170747	6.43606e-08	0.00275064	2.75692e-05
1	119113274	1:119113274:A:C	ENSG00000231365	WARS2-AS1	chr1:119147069:119150565:clu_28354_?:ENSG00000231365	A	C	-27185	0.552083	65	86	1.70475e-06	-0.899913	0.175398	6.43606e-08	0.00275064	2.75692e-05
1	119113870	1:119113870:T:G	ENSG00000231365	WARS2-AS1	chr1:119147069:119150565:clu_28354_?:ENSG00000231365	T	G	-26589	0.546875	65	87	4.59253e-06	-0.839173	0.171773	6.43606e-08	0.00275064	2.75692e-05
1	119113870	1:119113870:T:G	ENSG00000231365	WARS2-AS1	chr1:119147069:119149394:clu_28354_?:ENSG00000231365	T	G	-26589	0.546875	65	87	5.6221e-06	0.807478	0.167024	6.43606e-08	0.00275064	2.75692e-05
1	119114434	1:119114434:T:G	ENSG00000231365	WARS2-AS1	chr1:119147069:119149394:clu_28354_?:ENSG00000231365	T	G	-26025	0.552083	65	86	2.32033e-06	0.863128	0.170747	6.43606e-08	0.00275064	2.75692e-05
1	119114434	1:119114434:T:G	ENSG00000231365	WARS2-AS1	chr1:119147069:119150565:clu_28354_?:ENSG00000231365	T	G	-26025	0.552083	65	86	1.70475e-06	-0.899913	0.175398	6.43606e-08	0.00275064	2.75692e-05
1	119115120	1:119115120:T:A	ENSG00000231365	WARS2-AS1	chr1:119147069:119149394:clu_28354_?:ENSG00000231365	T	A	-25339	0.510417	69	94	2.34888e-06	0.830408	0.164373	6.43606e-08	0.00275064	2.75692e-05
1	119115120	1:119115120:T:A	ENSG00000231365	WARS2-AS1	chr1:119147069:119150565:clu_28354_?:ENSG00000231365	T	A	-25339	0.510417	69	94	3.2447e-06	-0.845359	0.170023	6.43606e-08	0.00275064	2.75692e-05
1	119116302	1:119116302:A:G	ENSG00000231365	WARS2-AS1	chr1:119147069:119150565:clu_28354_?:ENSG00000231365	A	G	-24157	0.526042	67	91	1.36074e-06	-0.880662	0.169825	6.43606e-08	0.00275064	2.75692e-05
1	119116302	1:119116302:A:G	ENSG00000231365	WARS2-AS1	chr1:119147069:119149394:clu_28354_?:ENSG00000231365	A	G	-24157	0.526042	67	91	1.1203e-06	0.86036	0.164412	6.43606e-08	0.00275064	2.75692e-05
1	119116796	1:119116796:C:T	ENSG00000231365	WARS2-AS1	chr1:119147069:119149394:clu_28354_?:ENSG00000231365	C	T	-23663	0.541667	66	88	2.24698e-06	0.838433	0.165603	6.43606e-08	0.00275064	2.75692e-05
1	119116796	1:119116796:C:T	ENSG00000231365	WARS2-AS1	chr1:119147069:119150565:clu_28354_?:ENSG00000231365	C	T	-23663	0.541667	66	88	1.86744e-06	-0.870178	0.170344	6.43606e-08	0.00275064	2.75692e-05
1	119117882	1:119117882:G:C	ENSG00000231365	WARS2-AS1	chr1:119147069:119150565:clu_28354_?:ENSG00000231365	G	C	-22577	0.510417	69	94	3.2447e-06	-0.845359	0.170023	6.43606e-08	0.00275064	2.75692e-05
1	119117882	1:119117882:G:C	ENSG00000231365	WARS2-AS1	chr1:119147069:119149394:clu_28354_?:ENSG00000231365	G	C	-22577	0.510417	69	94	2.34888e-06	0.830408	0.164373	6.43606e-08	0.00275064	2.75692e-05
1	119118196	1:119118196:G:T	ENSG00000231365	WARS2-AS1	chr1:119147069:119149394:clu_28354_?:ENSG00000231365	G	T	-22263	0.520833	68	92	2.64832e-06	0.848983	0.169041	6.43606e-08	0.00275064	2.75692e-05
1	119118196	1:119118196:G:T	ENSG00000231365	WARS2-AS1	chr1:119147069:119150565:clu_28354_?:ENSG00000231365	G	T	-22263	0.520833	68	92	3.29077e-06	-0.867745	0.174648	6.43606e-08	0.00275064	2.75692e-05
1	119121090	1:119121090:C:T	ENSG00000231365	WARS2-AS1	chr1:119147069:119150565:clu_28354_?:ENSG00000231365	C	T	-19369	0.552083	65	86	1.70475e-06	-0.899913	0.175398	6.43606e-08	0.00275064	2.75692e-05
1	119121090	1:119121090:C:T	ENSG00000231365	WARS2-AS1	chr1:119147069:119149394:clu_28354_?:ENSG00000231365	C	T	-19369	0.552083	65	86	2.32033e-06	0.863128	0.170747	6.43606e-08	0.00275064	2.75692e-05
1	119121625	1:119121625:T:C	ENSG00000231365	WARS2-AS1	chr1:119147069:119150565:clu_28354_?:ENSG00000231365	T	C	-18834	0.541667	66	88	1.86744e-06	-0.870178	0.170344	6.43606e-08	0.00275064	2.75692e-05
1	119121625	1:119121625:T:C	ENSG00000231365	WARS2-AS1	chr1:119147069:119149394:clu_28354_?:ENSG00000231365	T	C	-18834	0.541667	66	88	2.24698e-06	0.838433	0.165603	6.43606e-08	0.00275064	2.75692e-05
1	119123240	1:119123240:C:T	ENSG00000231365	WARS2-AS1	chr1:119147069:119149394:clu_28354_?:ENSG00000231365	C	T	-17219	0.552083	65	86	2.32033e-06	0.863128	0.170747	6.43606e-08	0.00275064	2.75692e-05
1	119123240	1:119123240:C:T	ENSG00000231365	WARS2-AS1	chr1:119147069:119150565:clu_28354_?:ENSG00000231365	C	T	-17219	0.552083	65	86	1.70475e-06	-0.899913	0.175398	6.43606e-08	0.00275064	2.75692e-05
1	119123942	1:119123942:A:G	ENSG00000231365	WARS2-AS1	chr1:119147069:119150565:clu_28354_?:ENSG00000231365	A	G	-16517	0.567708	63	83	9.44035e-06	-0.797338	0.169538	6.43606e-08	0.00275064	2.75692e-05
1	119123942	1:119123942:A:G	ENSG00000231365	WARS2-AS1	chr1:119147069:119149394:clu_28354_?:ENSG00000231365	A	G	-16517	0.567708	63	83	1.08146e-05	0.768992	0.16473	6.43606e-08	0.00275064	2.75692e-05
1	119126643	1:119126643:G:C	ENSG00000231365	WARS2-AS1	chr1:119147069:119149394:clu_28354_?:ENSG00000231365	G	C	-13816	0.567708	63	83	1.08146e-05	0.768992	0.16473	6.43606e-08	0.00275064	2.75692e-05
1	119126643	1:119126643:G:C	ENSG00000231365	WARS2-AS1	chr1:119147069:119150565:clu_28354_?:ENSG00000231365	G	C	-13816	0.567708	63	83	9.44035e-06	-0.797338	0.169538	6.43606e-08	0.00275064	2.75692e-05
1	119126648	1:119126648:A:G	ENSG00000231365	WARS2-AS1	chr1:119147069:119150565:clu_28354_?:ENSG00000231365	A	G	-13811	0.567708	63	83	9.44035e-06	-0.797338	0.169538	6.43606e-08	0.00275064	2.75692e-05
1	119126648	1:119126648:A:G	ENSG00000231365	WARS2-AS1	chr1:119147069:119149394:clu_28354_?:ENSG00000231365	A	G	-13811	0.567708	63	83	1.08146e-05	0.768992	0.16473	6.43606e-08	0.00275064	2.75692e-05
1	119127572	1:119127572:A:T	ENSG00000231365	WARS2-AS1	chr1:119147069:119149394:clu_28354_?:ENSG00000231365	A	T	-12887	0.583333	62	80	2.2477e-05	0.776189	0.173318	6.43606e-08	0.00275064	2.75692e-05
1	119127572	1:119127572:A:T	ENSG00000231365	WARS2-AS1	chr1:119147069:119150565:clu_28354_?:ENSG00000231365	A	T	-12887	0.583333	62	80	2.25263e-05	-0.799947	0.178646	6.43606e-08	0.00275064	2.75692e-05
1	119128182	1:119128182:A:C	ENSG00000231365	WARS2-AS1	chr1:119147069:119150565:clu_28354_?:ENSG00000231365	A	C	-12277	0.588542	61	79	1.03563e-05	-0.812255	0.173585	6.43606e-08	0.00275064	2.75692e-05
1	119128182	1:119128182:A:C	ENSG00000231365	WARS2-AS1	chr1:119147069:119149394:clu_28354_?:ENSG00000231365	A	C	-12277	0.588542	61	79	1.06057e-05	0.787226	0.168455	6.43606e-08	0.00275064	2.75692e-05
1	119128459	1:119128459:C:T	ENSG00000231365	WARS2-AS1	chr1:119147069:119149394:clu_28354_?:ENSG00000231365	C	T	-12000	0.572917	62	82	5.0376e-06	0.779803	0.160383	6.43606e-08	0.00275064	2.75692e-05
1	119128459	1:119128459:C:T	ENSG00000231365	WARS2-AS1	chr1:119147069:119150565:clu_28354_?:ENSG00000231365	C	T	-12000	0.572917	62	82	4.26677e-06	-0.809167	0.165009	6.43606e-08	0.00275064	2.75692e-05
1	119129800	1:119129800:A:C	ENSG00000231365	WARS2-AS1	chr1:119147069:119150565:clu_28354_?:ENSG00000231365	A	C	-10659	0.557292	63	85	1.13714e-05	-0.780686	0.167698	6.43606e-08	0.00275064	2.75692e-05
1	119129800	1:119129800:A:C	ENSG00000231365	WARS2-AS1	chr1:119147069:119149394:clu_28354_?:ENSG00000231365	A	C	-10659	0.557292	63	85	1.07775e-05	0.759217	0.162605	6.43606e-08	0.00275064	2.75692e-05
1	119131464	1:119131464:T:G	ENSG00000231365	WARS2-AS1	chr1:119147069:119149394:clu_28354_?:ENSG00000231365	T	G	-8995	0.557292	62	85	2.10703e-05	0.698694	0.155426	6.43606e-08	0.00275064	2.75692e-05
1	119135698	1:119135698:T:C	ENSG00000231365	WARS2-AS1	chr1:119147069:119149394:clu_28354_?:ENSG00000231365	T	C	-4761	0.578125	61	81	1.71714e-05	0.727031	0.159831	6.43606e-08	0.00275064	2.75692e-05
1	119135698	1:119135698:T:C	ENSG00000231365	WARS2-AS1	chr1:119147069:119150565:clu_28354_?:ENSG00000231365	T	C	-4761	0.578125	61	81	1.48192e-05	-0.754451	0.164476	6.43606e-08	0.00275064	2.75692e-05
1	119137515	1:119137515:C:T	ENSG00000231365	WARS2-AS1	chr1:119147069:119150565:clu_28354_?:ENSG00000231365	T	C	-2944	0.421875	61	81	1.48192e-05	0.754451	0.164476	6.43606e-08	0.00275064	2.75692e-05
1	119137515	1:119137515:C:T	ENSG00000231365	WARS2-AS1	chr1:119147069:119149394:clu_28354_?:ENSG00000231365	T	C	-2944	0.421875	61	81	1.71714e-05	-0.727031	0.159831	6.43606e-08	0.00275064	2.75692e-05
1	119137673	1:119137673:C:T	ENSG00000231365	WARS2-AS1	chr1:119147069:119150565:clu_28354_?:ENSG00000231365	T	C	-2786	0.442708	63	85	1.13714e-05	0.780686	0.167698	6.43606e-08	0.00275064	2.75692e-05
1	119137673	1:119137673:C:T	ENSG00000231365	WARS2-AS1	chr1:119147069:119149394:clu_28354_?:ENSG00000231365	T	C	-2786	0.442708	63	85	1.07775e-05	-0.759217	0.162605	6.43606e-08	0.00275064	2.75692e-05
1	119138344	1:119138344:A:G	ENSG00000231365	WARS2-AS1	chr1:119147069:119149394:clu_28354_?:ENSG00000231365	G	A	-2115	0.453125	64	87	2.34437e-05	-0.701476	0.157023	6.43606e-08	0.00275064	2.75692e-05
1	119138374	1:119138374:T:A	ENSG00000231365	WARS2-AS1	chr1:119147069:119150565:clu_28354_?:ENSG00000231365	A	T	-2085	0.473958	66	91	2.5208e-05	0.735148	0.165267	6.43606e-08	0.00275064	2.75692e-05
1	119138374	1:119138374:T:A	ENSG00000231365	WARS2-AS1	chr1:119147069:119149394:clu_28354_?:ENSG00000231365	A	T	-2085	0.473958	66	91	1.5672e-05	-0.729377	0.159514	6.43606e-08	0.00275064	2.75692e-05
1	119139605	1:119139605:T:A	ENSG00000231365	WARS2-AS1	chr1:119147069:119150565:clu_28354_?:ENSG00000231365	A	T	-854	0.421875	61	81	1.48192e-05	0.754451	0.164476	6.43606e-08	0.00275064	2.75692e-05
1	119139605	1:119139605:T:A	ENSG00000231365	WARS2-AS1	chr1:119147069:119149394:clu_28354_?:ENSG00000231365	A	T	-854	0.421875	61	81	1.71714e-05	-0.727031	0.159831	6.43606e-08	0.00275064	2.75692e-05
1	119144389	1:119144389:A:G	ENSG00000231365	WARS2-AS1	chr1:119147069:119150565:clu_28354_?:ENSG00000231365	G	A	3930	0.453125	65	87	2.12693e-06	0.855209	0.168467	6.43606e-08	0.00275064	2.75692e-05
1	119144389	1:119144389:A:G	ENSG00000231365	WARS2-AS1	chr1:119147069:119149394:clu_28354_?:ENSG00000231365	G	A	3930	0.453125	65	87	1.41777e-06	-0.842191	0.16272	6.43606e-08	0.00275064	2.75692e-05
1	119147735	1:119147735:C:G	ENSG00000231365	WARS2-AS1	chr1:119147069:119149394:clu_28354_?:ENSG00000231365	G	C	7276	0.479167	67	92	1.70349e-07	-0.916443	0.161314	6.43606e-08	0.00275064	2.75692e-05
1	119147735	1:119147735:C:G	ENSG00000231365	WARS2-AS1	chr1:119147069:119150565:clu_28354_?:ENSG00000231365	G	C	7276	0.479167	67	92	1.28537e-07	0.95255	0.165753	6.43606e-08	0.00275064	2.75692e-05
1	119149425	1:119149425:A:G	ENSG00000231365	WARS2-AS1	chr1:119147069:119150565:clu_28354_?:ENSG00000231365	G	A	8966	0.458333	65	88	2.45338e-07	0.907671	0.162213	6.43606e-08	0.00275064	2.75692e-05
1	119149425	1:119149425:A:G	ENSG00000231365	WARS2-AS1	chr1:119147069:119149394:clu_28354_?:ENSG00000231365	G	A	8966	0.458333	65	88	4.12301e-07	-0.86625	0.158283	6.43606e-08	0.00275064	2.75692e-05
1	119151807	1:119151807:T:A	ENSG00000231365	WARS2-AS1	chr1:119147069:119150565:clu_28354_?:ENSG00000231365	T	A	11348	0.567708	62	83	1.87925e-06	0.923834	0.180902	6.43606e-08	0.00275064	2.75692e-05
1	119151807	1:119151807:T:A	ENSG00000231365	WARS2-AS1	chr1:119147069:119149394:clu_28354_?:ENSG00000231365	T	A	11348	0.567708	62	83	2.02206e-06	-0.893866	0.175652	6.43606e-08	0.00275064	2.75692e-05
1	119153455	1:119153455:G:A	ENSG00000231365	WARS2-AS1	chr1:119147069:119149394:clu_28354_?:ENSG00000231365	A	G	12996	0.46875	65	90	3.32405e-07	-0.8643	0.156467	6.43606e-08	0.00275064	2.75692e-05
1	119153455	1:119153455:G:A	ENSG00000231365	WARS2-AS1	chr1:119147069:119150565:clu_28354_?:ENSG00000231365	A	G	12996	0.46875	65	90	2.00732e-07	0.904959	0.160378	6.43606e-08	0.00275064	2.75692e-05
1	119156803	1:119156803:A:G	ENSG00000231365	WARS2-AS1	chr1:119147069:119150565:clu_28354_?:ENSG00000231365	G	A	16344	0.489583	68	94	4.37403e-07	0.885357	0.162191	6.43606e-08	0.00275064	2.75692e-05
1	119156803	1:119156803:A:G	ENSG00000231365	WARS2-AS1	chr1:119147069:119149394:clu_28354_?:ENSG00000231365	G	A	16344	0.489583	68	94	4.22096e-07	-0.859967	0.157295	6.43606e-08	0.00275064	2.75692e-05
1	119157601	1:119157601:C:T	ENSG00000231365	WARS2-AS1	chr1:119147069:119149394:clu_28354_?:ENSG00000231365	T	C	17142	0.479167	67	92	1.70349e-07	-0.916443	0.161314	6.43606e-08	0.00275064	2.75692e-05
1	119157601	1:119157601:C:T	ENSG00000231365	WARS2-AS1	chr1:119147069:119150565:clu_28354_?:ENSG00000231365	T	C	17142	0.479167	67	92	1.28537e-07	0.95255	0.165753	6.43606e-08	0.00275064	2.75692e-05
1	119161697	1:119161697:A:T	ENSG00000231365	WARS2-AS1	chr1:119147069:119149394:clu_28354_?:ENSG00000231365	A	T	21238	0.510417	68	94	1.85e-07	-0.906645	0.160134	6.43606e-08	0.00275064	2.75692e-05
1	119161697	1:119161697:A:T	ENSG00000231365	WARS2-AS1	chr1:119147069:119150565:clu_28354_?:ENSG00000231365	A	T	21238	0.510417	68	94	2.50799e-07	0.925806	0.165608	6.43606e-08	0.00275064	2.75692e-05
1	119168743	1:119168743:A:G	ENSG00000231365	WARS2-AS1	chr1:119147069:119150565:clu_28354_?:ENSG00000231365	A	G	28284	0.510417	68	94	2.50799e-07	0.925806	0.165608	6.43606e-08	0.00275064	2.75692e-05
1	119168743	1:119168743:A:G	ENSG00000231365	WARS2-AS1	chr1:119147069:119149394:clu_28354_?:ENSG00000231365	A	G	28284	0.510417	68	94	1.85e-07	-0.906645	0.160134	6.43606e-08	0.00275064	2.75692e-05
1	119168768	1:119168768:T:C	ENSG00000231365	WARS2-AS1	chr1:119147069:119150565:clu_28354_?:ENSG00000231365	C	T	28309	0.489583	68	94	4.37403e-07	0.885357	0.162191	6.43606e-08	0.00275064	2.75692e-05
1	119168768	1:119168768:T:C	ENSG00000231365	WARS2-AS1	chr1:119147069:119149394:clu_28354_?:ENSG00000231365	C	T	28309	0.489583	68	94	4.22096e-07	-0.859967	0.157295	6.43606e-08	0.00275064	2.75692e-05
1	119168769	1:119168769:G:A	ENSG00000231365	WARS2-AS1	chr1:119147069:119150565:clu_28354_?:ENSG00000231365	A	G	28310	0.479167	67	92	4.37717e-07	0.907456	0.166244	6.43606e-08	0.00275064	2.75692e-05
1	119168769	1:119168769:G:A	ENSG00000231365	WARS2-AS1	chr1:119147069:119149394:clu_28354_?:ENSG00000231365	A	G	28310	0.479167	67	92	4.76919e-07	-0.877949	0.161443	6.43606e-08	0.00275064	2.75692e-05
1	119171614	1:119171614:A:G	ENSG00000231365	WARS2-AS1	chr1:119147069:119150565:clu_28354_?:ENSG00000231365	G	A	31155	0.479167	67	92	4.37717e-07	0.907456	0.166244	6.43606e-08	0.00275064	2.75692e-05
1	119171614	1:119171614:A:G	ENSG00000231365	WARS2-AS1	chr1:119147069:119149394:clu_28354_?:ENSG00000231365	G	A	31155	0.479167	67	92	4.76919e-07	-0.877949	0.161443	6.43606e-08	0.00275064	2.75692e-05
1	119173781	1:119173781:A:G	ENSG00000231365	WARS2-AS1	chr1:119147069:119149394:clu_28354_?:ENSG00000231365	G	A	33322	0.484375	68	93	2.76629e-07	-0.876229	0.15739	6.43606e-08	0.00275064	2.75692e-05
1	119173781	1:119173781:A:G	ENSG00000231365	WARS2-AS1	chr1:119147069:119150565:clu_28354_?:ENSG00000231365	G	A	33322	0.484375	68	93	2.46683e-07	0.906376	0.162019	6.43606e-08	0.00275064	2.75692e-05
1	119174111	1:119174111:A:C	ENSG00000231365	WARS2-AS1	chr1:119147069:119150565:clu_28354_?:ENSG00000231365	C	A	33652	0.489583	68	94	4.37403e-07	0.885357	0.162191	6.43606e-08	0.00275064	2.75692e-05
1	119174111	1:119174111:A:C	ENSG00000231365	WARS2-AS1	chr1:119147069:119149394:clu_28354_?:ENSG00000231365	C	A	33652	0.489583	68	94	4.22096e-07	-0.859967	0.157295	6.43606e-08	0.00275064	2.75692e-05
1	119174283	1:119174283:G:A	ENSG00000231365	WARS2-AS1	chr1:119147069:119149394:clu_28354_?:ENSG00000231365	A	G	33824	0.489583	68	94	4.22096e-07	-0.859967	0.157295	6.43606e-08	0.00275064	2.75692e-05
1	119174283	1:119174283:G:A	ENSG00000231365	WARS2-AS1	chr1:119147069:119150565:clu_28354_?:ENSG00000231365	A	G	33824	0.489583	68	94	4.37403e-07	0.885357	0.162191	6.43606e-08	0.00275064	2.75692e-05
1	119175188	1:119175188:C:G	ENSG00000231365	WARS2-AS1	chr1:119147069:119150565:clu_28354_?:ENSG00000231365	G	C	34729	0.489583	68	94	4.37403e-07	0.885357	0.162191	6.43606e-08	0.00275064	2.75692e-05
1	119175188	1:119175188:C:G	ENSG00000231365	WARS2-AS1	chr1:119147069:119149394:clu_28354_?:ENSG00000231365	G	C	34729	0.489583	68	94	4.22096e-07	-0.859967	0.157295	6.43606e-08	0.00275064	2.75692e-05
1	119175716	1:119175716:C:A	ENSG00000231365	WARS2-AS1	chr1:119147069:119150565:clu_28354_?:ENSG00000231365	A	C	35257	0.479167	67	92	4.37717e-07	0.907456	0.166244	6.43606e-08	0.00275064	2.75692e-05
1	119175716	1:119175716:C:A	ENSG00000231365	WARS2-AS1	chr1:119147069:119149394:clu_28354_?:ENSG00000231365	A	C	35257	0.479167	67	92	4.76919e-07	-0.877949	0.161443	6.43606e-08	0.00275064	2.75692e-05
1	119177541	1:119177541:T:G	ENSG00000231365	WARS2-AS1	chr1:119147069:119149394:clu_28354_?:ENSG00000231365	G	T	37082	0.458333	65	88	4.12301e-07	-0.86625	0.158283	6.43606e-08	0.00275064	2.75692e-05
1	119177541	1:119177541:T:G	ENSG00000231365	WARS2-AS1	chr1:119147069:119150565:clu_28354_?:ENSG00000231365	G	T	37082	0.458333	65	88	2.45338e-07	0.907671	0.162213	6.43606e-08	0.00275064	2.75692e-05
1	119179456	1:119179456:A:G	ENSG00000231365	WARS2-AS1	chr1:119147069:119150565:clu_28354_?:ENSG00000231365	G	A	38997	0.447917	64	86	2.18745e-07	0.936709	0.1666	6.43606e-08	0.00275064	2.75692e-05
1	119179456	1:119179456:A:G	ENSG00000231365	WARS2-AS1	chr1:119147069:119149394:clu_28354_?:ENSG00000231365	G	A	38997	0.447917	64	86	4.23648e-07	-0.890018	0.162818	6.43606e-08	0.00275064	2.75692e-05
1	119180155	1:119180155:A:G	ENSG00000231365	WARS2-AS1	chr1:119147069:119149394:clu_28354_?:ENSG00000231365	G	A	39696	0.489583	68	94	4.22096e-07	-0.859967	0.157295	6.43606e-08	0.00275064	2.75692e-05
1	119180155	1:119180155:A:G	ENSG00000231365	WARS2-AS1	chr1:119147069:119150565:clu_28354_?:ENSG00000231365	G	A	39696	0.489583	68	94	4.37403e-07	0.885357	0.162191	6.43606e-08	0.00275064	2.75692e-05
1	119182902	1:119182902:C:T	ENSG00000231365	WARS2-AS1	chr1:119147069:119149394:clu_28354_?:ENSG00000231365	T	C	42443	0.463542	66	89	6.68222e-08	-0.932715	0.158133	6.43606e-08	0.00275064	2.75692e-05
1	119182902	1:119182902:C:T	ENSG00000231365	WARS2-AS1	chr1:119147069:119150565:clu_28354_?:ENSG00000231365	T	C	42443	0.463542	66	89	6.43606e-08	0.962374	0.162922	6.43606e-08	0.00275064	2.75692e-05
1	119187700	1:119187700:C:T	ENSG00000231365	WARS2-AS1	chr1:119147069:119149394:clu_28354_?:ENSG00000231365	T	C	47241	0.442708	64	85	1.24285e-07	-0.899135	0.156245	6.43606e-08	0.00275064	2.75692e-05
1	119187700	1:119187700:C:T	ENSG00000231365	WARS2-AS1	chr1:119147069:119150565:clu_28354_?:ENSG00000231365	T	C	47241	0.442708	64	85	9.14918e-08	0.93503	0.1605	6.43606e-08	0.00275064	2.75692e-05
1	119188540	1:119188540:C:A	ENSG00000231365	WARS2-AS1	chr1:119147069:119149394:clu_28354_?:ENSG00000231365	A	C	48081	0.442708	64	85	1.24285e-07	-0.899135	0.156245	6.43606e-08	0.00275064	2.75692e-05
1	119188540	1:119188540:C:A	ENSG00000231365	WARS2-AS1	chr1:119147069:119150565:clu_28354_?:ENSG00000231365	A	C	48081	0.442708	64	85	9.14918e-08	0.93503	0.1605	6.43606e-08	0.00275064	2.75692e-05
1	119192607	1:119192607:C:T	ENSG00000231365	WARS2-AS1	chr1:119147069:119150565:clu_28354_?:ENSG00000231365	T	C	52148	0.442708	64	85	9.14918e-08	0.93503	0.1605	6.43606e-08	0.00275064	2.75692e-05
1	119192607	1:119192607:C:T	ENSG00000231365	WARS2-AS1	chr1:119147069:119149394:clu_28354_?:ENSG00000231365	T	C	52148	0.442708	64	85	1.24285e-07	-0.899135	0.156245	6.43606e-08	0.00275064	2.75692e-05
1	119193906	1:119193906:T:C	ENSG00000231365	WARS2-AS1	chr1:119147069:119150565:clu_28354_?:ENSG00000231365	T	C	53447	0.510417	68	94	2.50799e-07	0.925806	0.165608	6.43606e-08	0.00275064	2.75692e-05
1	119193906	1:119193906:T:C	ENSG00000231365	WARS2-AS1	chr1:119147069:119149394:clu_28354_?:ENSG00000231365	T	C	53447	0.510417	68	94	1.85e-07	-0.906645	0.160134	6.43606e-08	0.00275064	2.75692e-05
1	119194738	1:119194738:A:G	ENSG00000231365	WARS2-AS1	chr1:119147069:119150565:clu_28354_?:ENSG00000231365	G	A	54279	0.489583	68	94	4.37403e-07	0.885357	0.162191	6.43606e-08	0.00275064	2.75692e-05
1	119194738	1:119194738:A:G	ENSG00000231365	WARS2-AS1	chr1:119147069:119149394:clu_28354_?:ENSG00000231365	G	A	54279	0.489583	68	94	4.22096e-07	-0.859967	0.157295	6.43606e-08	0.00275064	2.75692e-05
1	119195348	1:119195348:T:G	ENSG00000231365	WARS2-AS1	chr1:119147069:119150565:clu_28354_?:ENSG00000231365	G	T	54889	0.458333	65	88	2.45338e-07	0.907671	0.162213	6.43606e-08	0.00275064	2.75692e-05
1	119195348	1:119195348:T:G	ENSG00000231365	WARS2-AS1	chr1:119147069:119149394:clu_28354_?:ENSG00000231365	G	T	54889	0.458333	65	88	4.12301e-07	-0.86625	0.158283	6.43606e-08	0.00275064	2.75692e-05
1	119200954	1:119200954:G:C	ENSG00000231365	WARS2-AS1	chr1:119147069:119150565:clu_28354_?:ENSG00000231365	C	G	60495	0.489583	68	94	4.37403e-07	0.885357	0.162191	6.43606e-08	0.00275064	2.75692e-05
1	119200954	1:119200954:G:C	ENSG00000231365	WARS2-AS1	chr1:119147069:119149394:clu_28354_?:ENSG00000231365	C	G	60495	0.489583	68	94	4.22096e-07	-0.859967	0.157295	6.43606e-08	0.00275064	2.75692e-05
1	119206737	1:119206737:A:G	ENSG00000231365	WARS2-AS1	chr1:119147069:119149394:clu_28354_?:ENSG00000231365	G	A	66278	0.494792	69	95	6.13381e-07	-0.864664	0.160776	6.43606e-08	0.00275064	2.75692e-05
1	119206737	1:119206737:A:G	ENSG00000231365	WARS2-AS1	chr1:119147069:119150565:clu_28354_?:ENSG00000231365	G	A	66278	0.494792	69	95	1.41708e-06	0.865648	0.167248	6.43606e-08	0.00275064	2.75692e-05
1	119210136	1:119210136:A:G	ENSG00000231365	WARS2-AS1	chr1:119147069:119149394:clu_28354_?:ENSG00000231365	G	A	69677	0.489583	68	94	4.22096e-07	-0.859967	0.157295	6.43606e-08	0.00275064	2.75692e-05
1	119210136	1:119210136:A:G	ENSG00000231365	WARS2-AS1	chr1:119147069:119150565:clu_28354_?:ENSG00000231365	G	A	69677	0.489583	68	94	4.37403e-07	0.885357	0.162191	6.43606e-08	0.00275064	2.75692e-05
1	119213500	1:119213500:T:C	ENSG00000231365	WARS2-AS1	chr1:119147069:119149394:clu_28354_?:ENSG00000231365	C	T	73041	0.489583	68	94	4.22096e-07	-0.859967	0.157295	6.43606e-08	0.00275064	2.75692e-05
1	119213500	1:119213500:T:C	ENSG00000231365	WARS2-AS1	chr1:119147069:119150565:clu_28354_?:ENSG00000231365	C	T	73041	0.489583	68	94	4.37403e-07	0.885357	0.162191	6.43606e-08	0.00275064	2.75692e-05
1	119214536	1:119214536:A:G	ENSG00000231365	WARS2-AS1	chr1:119147069:119150565:clu_28354_?:ENSG00000231365	A	G	74077	0.510417	68	94	2.50799e-07	0.925806	0.165608	6.43606e-08	0.00275064	2.75692e-05
1	119214536	1:119214536:A:G	ENSG00000231365	WARS2-AS1	chr1:119147069:119149394:clu_28354_?:ENSG00000231365	A	G	74077	0.510417	68	94	1.85e-07	-0.906645	0.160134	6.43606e-08	0.00275064	2.75692e-05
1	119214709	1:119214709:A:C	ENSG00000231365	WARS2-AS1	chr1:119147069:119149394:clu_28354_?:ENSG00000231365	C	A	74250	0.489583	68	94	4.22096e-07	-0.859967	0.157295	6.43606e-08	0.00275064	2.75692e-05
1	119214709	1:119214709:A:C	ENSG00000231365	WARS2-AS1	chr1:119147069:119150565:clu_28354_?:ENSG00000231365	C	A	74250	0.489583	68	94	4.37403e-07	0.885357	0.162191	6.43606e-08	0.00275064	2.75692e-05
1	119216160	1:119216160:A:G	ENSG00000231365	WARS2-AS1	chr1:119147069:119149394:clu_28354_?:ENSG00000231365	G	A	75701	0.489583	68	94	4.22096e-07	-0.859967	0.157295	6.43606e-08	0.00275064	2.75692e-05
1	119216160	1:119216160:A:G	ENSG00000231365	WARS2-AS1	chr1:119147069:119150565:clu_28354_?:ENSG00000231365	G	A	75701	0.489583	68	94	4.37403e-07	0.885357	0.162191	6.43606e-08	0.00275064	2.75692e-05
1	119219102	1:119219102:T:C	ENSG00000231365	WARS2-AS1	chr1:119147069:119150565:clu_28354_?:ENSG00000231365	C	T	78643	0.489583	68	94	4.37403e-07	0.885357	0.162191	6.43606e-08	0.00275064	2.75692e-05
1	119219102	1:119219102:T:C	ENSG00000231365	WARS2-AS1	chr1:119147069:119149394:clu_28354_?:ENSG00000231365	C	T	78643	0.489583	68	94	4.22096e-07	-0.859967	0.157295	6.43606e-08	0.00275064	2.75692e-05
1	149122618	1:149122618:A:G	ENSG00000274265	AC245297.3	chr1:149177212:149250565:clu_28479_?:ENSG00000274265	G	A	-53130	0.177083	32	34	7.28679e-06	0.773455	0.162186	7.31054e-08	0.00230897	3.27631e-05
1	149156358	1:149156358:G:C	ENSG00000274265	AC245297.3	chr1:149176250:149250565:clu_28479_?:ENSG00000274265	C	G	-19390	0.177083	32	34	1.61241e-05	-0.876667	0.192037	7.31054e-08	0.00230897	3.27631e-05
1	149156358	1:149156358:G:C	ENSG00000274265	AC245297.3	chr1:149177212:149250565:clu_28479_?:ENSG00000274265	C	G	-19390	0.177083	32	34	7.91723e-07	0.841249	0.158225	7.31054e-08	0.00230897	3.27631e-05
1	149156482	1:149156482:A:T	ENSG00000274265	AC245297.3	chr1:149176250:149250565:clu_28479_?:ENSG00000274265	T	A	-19266	0.177083	32	34	1.61241e-05	-0.876667	0.192037	7.31054e-08	0.00230897	3.27631e-05
1	149156482	1:149156482:A:T	ENSG00000274265	AC245297.3	chr1:149177212:149250565:clu_28479_?:ENSG00000274265	T	A	-19266	0.177083	32	34	7.91723e-07	0.841249	0.158225	7.31054e-08	0.00230897	3.27631e-05
1	149169688	1:149169688:G:A	ENSG00000274265	AC245297.3	chr1:149177212:149250565:clu_28479_?:ENSG00000274265	A	G	-6060	0.171875	30	33	1.19253e-05	0.729538	0.157124	7.31054e-08	0.00230897	3.27631e-05
1	149176373	1:149176373:A:G	ENSG00000274265	AC245297.3	chr1:149177212:149250565:clu_28479_?:ENSG00000274265	G	A	625	0.125	23	24	7.31054e-08	1.03747	0.176513	7.31054e-08	0.00230897	3.27631e-05
1	149177165	1:149177165:A:G	ENSG00000274265	AC245297.3	chr1:149177212:149250565:clu_28479_?:ENSG00000274265	G	A	1417	0.182292	32	35	2.35499e-05	0.703219	0.157455	7.31054e-08	0.00230897	3.27631e-05
1	149183004	1:149183004:C:T	ENSG00000274265	AC245297.3	chr1:149177212:149250565:clu_28479_?:ENSG00000274265	T	C	7256	0.182292	32	35	7.99813e-06	0.738011	0.155525	7.31054e-08	0.00230897	3.27631e-05
1	149195238	1:149195238:G:A	ENSG00000274265	AC245297.3	chr1:149177212:149250565:clu_28479_?:ENSG00000274265	A	G	19490	0.182292	32	35	7.99813e-06	0.738011	0.155525	7.31054e-08	0.00230897	3.27631e-05
1	155229524	1:155229524:C:G	ENSG00000160752	FDPS	chr1:155319688:155320409:clu_28785_?:ENSG00000160752	C	G	-79224	0.583333	68	80	7.79235e-06	0.69205	0.145637	1.72769e-34	4.92057e-24	1.90024e-05
1	155229875	1:155229875:T:C	ENSG00000160752	FDPS	chr1:155319688:155320409:clu_28785_?:ENSG00000160752	T	C	-78873	0.557292	71	85	7.16825e-06	0.677271	0.141893	1.72769e-34	4.92057e-24	1.90024e-05
1	155230533	1:155230533:G:T	ENSG00000160752	FDPS	chr1:155319688:155320409:clu_28785_?:ENSG00000160752	G	T	-78215	0.583333	68	80	7.79235e-06	0.69205	0.145637	1.72769e-34	4.92057e-24	1.90024e-05
1	155231399	1:155231399:G:A	ENSG00000160752	FDPS	chr1:155319688:155320409:clu_28785_?:ENSG00000160752	G	A	-77349	0.557292	71	85	7.16825e-06	0.677271	0.141893	1.72769e-34	4.92057e-24	1.90024e-05
1	155231444	1:155231444:G:A	ENSG00000160752	FDPS	chr1:155319688:155320409:clu_28785_?:ENSG00000160752	G	A	-77304	0.557292	71	85	7.16825e-06	0.677271	0.141893	1.72769e-34	4.92057e-24	1.90024e-05
1	155232202	1:155232202:A:G	ENSG00000160752	FDPS	chr1:155319688:155320409:clu_28785_?:ENSG00000160752	A	G	-76546	0.557292	71	85	7.16825e-06	0.677271	0.141893	1.72769e-34	4.92057e-24	1.90024e-05
1	155232898	1:155232898:A:C	ENSG00000160752	FDPS	chr1:155319688:155320409:clu_28785_?:ENSG00000160752	A	C	-75850	0.557292	71	85	7.16825e-06	0.677271	0.141893	1.72769e-34	4.92057e-24	1.90024e-05
1	155236550	1:155236550:T:G	ENSG00000160752	FDPS	chr1:155319688:155320409:clu_28785_?:ENSG00000160752	T	G	-72198	0.546875	73	87	8.8047e-07	0.744006	0.140612	1.72769e-34	4.92057e-24	1.90024e-05
1	155237758	1:155237758:T:C	ENSG00000160752	FDPS	chr1:155319688:155320409:clu_28785_?:ENSG00000160752	T	C	-70990	0.546875	73	87	8.8047e-07	0.744006	0.140612	1.72769e-34	4.92057e-24	1.90024e-05
1	155237835	1:155237835:G:A	ENSG00000160752	FDPS	chr1:155319688:155320409:clu_28785_?:ENSG00000160752	G	A	-70913	0.546875	73	87	8.8047e-07	0.744006	0.140612	1.72769e-34	4.92057e-24	1.90024e-05
1	155238856	1:155238856:T:C	ENSG00000160752	FDPS	chr1:155319688:155320409:clu_28785_?:ENSG00000160752	C	T	-69892	0.375	62	72	8.08701e-07	-0.787027	0.148169	1.72769e-34	4.92057e-24	1.90024e-05
1	155239569	1:155239569:C:T	ENSG00000160752	FDPS	chr1:155319688:155320409:clu_28785_?:ENSG00000160752	C	T	-69179	0.588542	68	79	2.71883e-06	0.732793	0.146095	1.72769e-34	4.92057e-24	1.90024e-05
1	155242309	1:155242309:A:G	ENSG00000160752	FDPS	chr1:155319688:155320409:clu_28785_?:ENSG00000160752	A	G	-66439	0.546875	73	87	8.8047e-07	0.744006	0.140612	1.72769e-34	4.92057e-24	1.90024e-05
1	155242420	1:155242420:A:G	ENSG00000160752	FDPS	chr1:155319688:155320409:clu_28785_?:ENSG00000160752	A	G	-66328	0.588542	68	79	2.71883e-06	0.732793	0.146095	1.72769e-34	4.92057e-24	1.90024e-05
1	155242497	1:155242497:C:T	ENSG00000160752	FDPS	chr1:155319688:155320409:clu_28785_?:ENSG00000160752	C	T	-66251	0.546875	73	87	8.8047e-07	0.744006	0.140612	1.72769e-34	4.92057e-24	1.90024e-05
1	155243333	1:155243333:T:A	ENSG00000160752	FDPS	chr1:155319688:155320409:clu_28785_?:ENSG00000160752	T	A	-65415	0.546875	73	87	8.8047e-07	0.744006	0.140612	1.72769e-34	4.92057e-24	1.90024e-05
1	155244275	1:155244275:C:T	ENSG00000160752	FDPS	chr1:155319688:155320409:clu_28785_?:ENSG00000160752	C	T	-64473	0.546875	73	87	8.8047e-07	0.744006	0.140612	1.72769e-34	4.92057e-24	1.90024e-05
1	155244682	1:155244682:A:G	ENSG00000160752	FDPS	chr1:155319688:155320409:clu_28785_?:ENSG00000160752	A	G	-64066	0.557292	72	85	1.0235e-05	0.664937	0.14201	1.72769e-34	4.92057e-24	1.90024e-05
1	155245471	1:155245471:T:C	ENSG00000160752	FDPS	chr1:155319688:155320409:clu_28785_?:ENSG00000160752	C	T	-63277	0.208333	29	40	9.28528e-06	1.08739	0.231004	1.72769e-34	4.92057e-24	1.90024e-05
1	155248377	1:155248377:T:C	ENSG00000160752	FDPS	chr1:155319688:155320409:clu_28785_?:ENSG00000160752	T	C	-60371	0.536458	72	89	1.93805e-08	0.838191	0.135608	1.72769e-34	4.92057e-24	1.90024e-05
1	155248574	1:155248574:T:C	ENSG00000160752	FDPS	chr1:155319928:155320409:clu_28785_?:ENSG00000160752	C	T	-60174	0.401042	62	77	1.80811e-05	-0.730197	0.161003	1.72769e-34	4.92057e-24	1.90024e-05
1	155248574	1:155248574:T:C	ENSG00000160752	FDPS	chr1:155319688:155320409:clu_28785_?:ENSG00000160752	C	T	-60174	0.401042	62	77	4.57563e-11	1.02359	0.136287	1.72769e-34	4.92057e-24	1.90024e-05
1	155248655	1:155248655:A:G	ENSG00000160752	FDPS	chr1:155319688:155320409:clu_28785_?:ENSG00000160752	A	G	-60093	0.557292	69	85	1.49773e-08	0.845883	0.135574	1.72769e-34	4.92057e-24	1.90024e-05
1	155248887	1:155248887:C:G	ENSG00000160752	FDPS	chr1:155319688:155320409:clu_28785_?:ENSG00000160752	C	G	-59861	0.557292	69	85	1.49773e-08	0.845883	0.135574	1.72769e-34	4.92057e-24	1.90024e-05
1	155249416	1:155249416:A:T	ENSG00000160752	FDPS	chr1:155319688:155320409:clu_28785_?:ENSG00000160752	A	T	-59332	0.536458	72	89	1.93805e-08	0.838191	0.135608	1.72769e-34	4.92057e-24	1.90024e-05
1	155249834	1:155249834:C:A	ENSG00000160752	FDPS	chr1:155319688:155320409:clu_28785_?:ENSG00000160752	C	A	-58914	0.536458	72	89	1.93805e-08	0.838191	0.135608	1.72769e-34	4.92057e-24	1.90024e-05
1	155250077	1:155250077:C:A	ENSG00000160752	FDPS	chr1:155319688:155320409:clu_28785_?:ENSG00000160752	C	A	-58671	0.536458	72	89	1.93805e-08	0.838191	0.135608	1.72769e-34	4.92057e-24	1.90024e-05
1	155252046	1:155252046:C:A	ENSG00000160752	FDPS	chr1:155319688:155320409:clu_28785_?:ENSG00000160752	C	A	-56702	0.53125	72	90	1.58127e-09	0.862438	0.127949	1.72769e-34	4.92057e-24	1.90024e-05
1	155252386	1:155252386:C:T	ENSG00000160752	FDPS	chr1:155319688:155320409:clu_28785_?:ENSG00000160752	C	T	-56362	0.536458	71	89	1.30555e-10	0.899561	0.123488	1.72769e-34	4.92057e-24	1.90024e-05
1	155252681	1:155252681:A:T	ENSG00000160752	FDPS	chr1:155319688:155320409:clu_28785_?:ENSG00000160752	A	T	-56067	0.53125	71	90	1.89032e-09	0.835606	0.124697	1.72769e-34	4.92057e-24	1.90024e-05
1	155252938	1:155252938:T:C	ENSG00000160752	FDPS	chr1:155319688:155320409:clu_28785_?:ENSG00000160752	T	C	-55810	0.536458	71	89	1.30555e-10	0.899561	0.123488	1.72769e-34	4.92057e-24	1.90024e-05
1	155252939	1:155252939:G:A	ENSG00000160752	FDPS	chr1:155319688:155320409:clu_28785_?:ENSG00000160752	G	A	-55809	0.536458	71	89	1.30555e-10	0.899561	0.123488	1.72769e-34	4.92057e-24	1.90024e-05
1	155253216	1:155253216:T:A	ENSG00000160752	FDPS	chr1:155319688:155320409:clu_28785_?:ENSG00000160752	T	A	-55532	0.536458	71	89	1.30555e-10	0.899561	0.123488	1.72769e-34	4.92057e-24	1.90024e-05
1	155254300	1:155254300:C:A	ENSG00000160752	FDPS	chr1:155319688:155320409:clu_28785_?:ENSG00000160752	C	A	-54448	0.536458	71	89	1.30555e-10	0.899561	0.123488	1.72769e-34	4.92057e-24	1.90024e-05
1	155254510	1:155254510:C:A	ENSG00000160752	FDPS	chr1:155319688:155320409:clu_28785_?:ENSG00000160752	C	A	-54238	0.53125	71	90	7.39931e-10	0.868555	0.125745	1.72769e-34	4.92057e-24	1.90024e-05
1	155258255	1:155258255:A:G	ENSG00000160752	FDPS	chr1:155319688:155320409:clu_28785_?:ENSG00000160752	A	G	-50493	0.541667	71	88	1.47046e-12	0.989283	0.120003	1.72769e-34	4.92057e-24	1.90024e-05
1	155258255	1:155258255:A:G	ENSG00000160752	FDPS	chr1:155319928:155320409:clu_28785_?:ENSG00000160752	A	G	-50493	0.541667	71	88	1.12417e-05	-0.682743	0.146566	1.72769e-34	4.92057e-24	1.90024e-05
1	155259431	1:155259431:G:A	ENSG00000160752	FDPS	chr1:155319688:155320409:clu_28785_?:ENSG00000160752	G	A	-49317	0.53125	72	90	1.38419e-11	0.939807	0.121004	1.72769e-34	4.92057e-24	1.90024e-05
1	155259975	1:155259975:T:C	ENSG00000160752	FDPS	chr1:155319688:155320409:clu_28785_?:ENSG00000160752	T	C	-48773	0.53125	72	90	1.38419e-11	0.939807	0.121004	1.72769e-34	4.92057e-24	1.90024e-05
1	155260124	1:155260124:G:T	ENSG00000160752	FDPS	chr1:155319688:155320409:clu_28785_?:ENSG00000160752	G	T	-48624	0.53125	72	90	1.38419e-11	0.939807	0.121004	1.72769e-34	4.92057e-24	1.90024e-05
1	155260340	1:155260340:C:T	ENSG00000160752	FDPS	chr1:155319688:155320409:clu_28785_?:ENSG00000160752	C	T	-48408	0.505208	75	95	8.08108e-13	0.975517	0.116541	1.72769e-34	4.92057e-24	1.90024e-05
1	155261754	1:155261754:T:G	ENSG00000160752	FDPS	chr1:155319688:155320409:clu_28785_?:ENSG00000160752	T	G	-46994	0.557292	69	85	2.13223e-12	1.00696	0.123327	1.72769e-34	4.92057e-24	1.90024e-05
1	155262283	1:155262283:C:T	ENSG00000160752	FDPS	chr1:155319688:155320409:clu_28785_?:ENSG00000160752	C	T	-46465	0.505208	75	95	8.08108e-13	0.975517	0.116541	1.72769e-34	4.92057e-24	1.90024e-05
1	155265030	1:155265030:A:G	ENSG00000160752	FDPS	chr1:155319688:155320409:clu_28785_?:ENSG00000160752	A	G	-43718	0.536458	71	89	3.36913e-12	0.952063	0.118008	1.72769e-34	4.92057e-24	1.90024e-05
1	155265702	1:155265702:T:C	ENSG00000160752	FDPS	chr1:155319688:155320409:clu_28785_?:ENSG00000160752	T	C	-43046	0.557292	69	85	2.13223e-12	1.00696	0.123327	1.72769e-34	4.92057e-24	1.90024e-05
1	155269833	1:155269833:G:A	ENSG00000160752	FDPS	chr1:155319688:155320409:clu_28785_?:ENSG00000160752	G	A	-38915	0.510417	74	94	1.66667e-13	0.967167	0.111113	1.72769e-34	4.92057e-24	1.90024e-05
1	155270286	1:155270286:G:A	ENSG00000160752	FDPS	chr1:155319688:155320409:clu_28785_?:ENSG00000160752	A	G	-38462	0.307292	47	59	2.42068e-11	-1.0999	0.143831	1.72769e-34	4.92057e-24	1.90024e-05
1	155271312	1:155271312:A:G	ENSG00000160752	FDPS	chr1:155319688:155320409:clu_28785_?:ENSG00000160752	A	G	-37436	0.536458	71	89	3.21248e-12	0.932313	0.115415	1.72769e-34	4.92057e-24	1.90024e-05
1	155271570	1:155271570:G:A	ENSG00000160752	FDPS	chr1:155319688:155320409:clu_28785_?:ENSG00000160752	G	A	-37178	0.510417	74	94	1.66667e-13	0.967167	0.111113	1.72769e-34	4.92057e-24	1.90024e-05
1	155272034	1:155272034:G:A	ENSG00000160752	FDPS	chr1:155319688:155320409:clu_28785_?:ENSG00000160752	G	A	-36714	0.510417	74	94	1.66667e-13	0.967167	0.111113	1.72769e-34	4.92057e-24	1.90024e-05
1	155274301	1:155274301:C:T	ENSG00000160752	FDPS	chr1:155319688:155320409:clu_28785_?:ENSG00000160752	C	T	-34447	0.510417	74	94	1.66667e-13	0.967167	0.111113	1.72769e-34	4.92057e-24	1.90024e-05
1	155274892	1:155274892:G:C	ENSG00000160752	FDPS	chr1:155319688:155320409:clu_28785_?:ENSG00000160752	G	C	-33856	0.510417	74	94	1.66667e-13	0.967167	0.111113	1.72769e-34	4.92057e-24	1.90024e-05
1	155275527	1:155275527:A:G	ENSG00000160752	FDPS	chr1:155319688:155320409:clu_28785_?:ENSG00000160752	A	G	-33221	0.510417	74	94	1.66667e-13	0.967167	0.111113	1.72769e-34	4.92057e-24	1.90024e-05
1	155277916	1:155277916:G:T	ENSG00000160752	FDPS	chr1:155319688:155320409:clu_28785_?:ENSG00000160752	T	G	-30832	0.427083	63	82	5.29431e-12	0.893525	0.112087	1.72769e-34	4.92057e-24	1.90024e-05
1	155278322	1:155278322:A:T	ENSG00000160752	FDPS	chr1:155319928:155320409:clu_28785_?:ENSG00000160752	T	A	-30426	0.401042	61	77	4.54952e-06	-0.701891	0.143603	1.72769e-34	4.92057e-24	1.90024e-05
1	155278322	1:155278322:A:T	ENSG00000160752	FDPS	chr1:155319688:155320409:clu_28785_?:ENSG00000160752	T	A	-30426	0.401042	61	77	4.03231e-14	1.02687	0.11405	1.72769e-34	4.92057e-24	1.90024e-05
1	155278784	1:155278784:G:A	ENSG00000160752	FDPS	chr1:155319688:155320409:clu_28785_?:ENSG00000160752	G	A	-29964	0.510417	74	94	1.66667e-13	0.967167	0.111113	1.72769e-34	4.92057e-24	1.90024e-05
1	155279907	1:155279907:G:T	ENSG00000160752	FDPS	chr1:155319688:155320409:clu_28785_?:ENSG00000160752	G	T	-28841	0.536458	71	89	3.21248e-12	0.932313	0.115415	1.72769e-34	4.92057e-24	1.90024e-05
1	155280900	1:155280900:A:T	ENSG00000160752	FDPS	chr1:155319688:155320409:clu_28785_?:ENSG00000160752	A	T	-27848	0.520833	73	92	1.77577e-11	0.914815	0.118599	1.72769e-34	4.92057e-24	1.90024e-05
1	155281858	1:155281858:T:C	ENSG00000160752	FDPS	chr1:155319688:155320409:clu_28785_?:ENSG00000160752	C	T	-26890	0.208333	29	40	9.28528e-06	1.08739	0.231004	1.72769e-34	4.92057e-24	1.90024e-05
1	155283042	1:155283042:G:A	ENSG00000160752	FDPS	chr1:155319688:155320409:clu_28785_?:ENSG00000160752	G	A	-25706	0.520833	73	92	1.77577e-11	0.914815	0.118599	1.72769e-34	4.92057e-24	1.90024e-05
1	155283517	1:155283517:C:T	ENSG00000160752	FDPS	chr1:155319928:155320409:clu_28785_?:ENSG00000160752	C	T	-25231	0.557292	68	85	1.36648e-05	-0.653914	0.141909	1.72769e-34	4.92057e-24	1.90024e-05
1	155283517	1:155283517:C:T	ENSG00000160752	FDPS	chr1:155319688:155320409:clu_28785_?:ENSG00000160752	C	T	-25231	0.557292	68	85	1.70812e-12	0.953729	0.116138	1.72769e-34	4.92057e-24	1.90024e-05
1	155283704	1:155283704:G:A	ENSG00000160752	FDPS	chr1:155319688:155320409:clu_28785_?:ENSG00000160752	A	G	-25044	0.208333	29	40	9.28528e-06	1.08739	0.231004	1.72769e-34	4.92057e-24	1.90024e-05
1	155283792	1:155283792:G:A	ENSG00000160752	FDPS	chr1:155319688:155320409:clu_28785_?:ENSG00000160752	A	G	-24956	0.489583	74	94	3.38972e-13	0.968606	0.113229	1.72769e-34	4.92057e-24	1.90024e-05
1	155286046	1:155286046:T:C	ENSG00000160752	FDPS	chr1:155319688:155320409:clu_28785_?:ENSG00000160752	C	T	-22702	0.494792	75	95	3.61622e-13	0.97974	0.114714	1.72769e-34	4.92057e-24	1.90024e-05
1	155286115	1:155286115:G:C	ENSG00000160752	FDPS	chr1:155319688:155320409:clu_28785_?:ENSG00000160752	C	G	-22633	0.494792	75	95	3.61622e-13	0.97974	0.114714	1.72769e-34	4.92057e-24	1.90024e-05
1	155286291	1:155286291:A:G	ENSG00000160752	FDPS	chr1:155319688:155320409:clu_28785_?:ENSG00000160752	G	A	-22457	0.494792	75	95	3.61622e-13	0.97974	0.114714	1.72769e-34	4.92057e-24	1.90024e-05
1	155286440	1:155286440:A:C	ENSG00000160752	FDPS	chr1:155319928:155320409:clu_28785_?:ENSG00000160752	A	C	-22308	0.5625	68	84	1.20691e-05	-0.672916	0.145025	1.72769e-34	4.92057e-24	1.90024e-05
1	155286440	1:155286440:A:C	ENSG00000160752	FDPS	chr1:155319688:155320409:clu_28785_?:ENSG00000160752	A	C	-22308	0.5625	68	84	5.2737e-13	0.992412	0.117294	1.72769e-34	4.92057e-24	1.90024e-05
1	155287701	1:155287701:C:G	ENSG00000160752	FDPS	chr1:155319688:155320409:clu_28785_?:ENSG00000160752	G	C	-21047	0.494792	75	95	3.61622e-13	0.97974	0.114714	1.72769e-34	4.92057e-24	1.90024e-05
1	155288961	1:155288961:G:A	ENSG00000160752	FDPS	chr1:155319688:155320409:clu_28785_?:ENSG00000160752	G	A	-19787	0.588542	64	79	4.71193e-11	0.894625	0.119215	1.72769e-34	4.92057e-24	1.90024e-05
1	155288965	1:155288965:C:T	ENSG00000160752	FDPS	chr1:155319688:155320409:clu_28785_?:ENSG00000160752	T	C	-19783	0.494792	75	95	3.61622e-13	0.97974	0.114714	1.72769e-34	4.92057e-24	1.90024e-05
1	155289532	1:155289532:C:T	ENSG00000160752	FDPS	chr1:155319688:155320409:clu_28785_?:ENSG00000160752	T	C	-19216	0.494792	75	95	3.61622e-13	0.97974	0.114714	1.72769e-34	4.92057e-24	1.90024e-05
1	155290305	1:155290305:G:A	ENSG00000160752	FDPS	chr1:155319688:155320409:clu_28785_?:ENSG00000160752	A	G	-18443	0.494792	75	95	3.61622e-13	0.97974	0.114714	1.72769e-34	4.92057e-24	1.90024e-05
1	155290559	1:155290559:A:G	ENSG00000160752	FDPS	chr1:155319688:155320409:clu_28785_?:ENSG00000160752	G	A	-18189	0.494792	75	95	3.61622e-13	0.97974	0.114714	1.72769e-34	4.92057e-24	1.90024e-05
1	155290592	1:155290592:G:T	ENSG00000160752	FDPS	chr1:155319688:155320409:clu_28785_?:ENSG00000160752	T	G	-18156	0.494792	75	95	3.61622e-13	0.97974	0.114714	1.72769e-34	4.92057e-24	1.90024e-05
1	155291986	1:155291986:C:T	ENSG00000160752	FDPS	chr1:155319688:155320409:clu_28785_?:ENSG00000160752	T	C	-16762	0.208333	29	40	9.28528e-06	1.08739	0.231004	1.72769e-34	4.92057e-24	1.90024e-05
1	155292822	1:155292822:C:G	ENSG00000160752	FDPS	chr1:155319688:155320409:clu_28785_?:ENSG00000160752	C	G	-15926	0.520833	73	92	1.77577e-11	0.914815	0.118599	1.72769e-34	4.92057e-24	1.90024e-05
1	155295386	1:155295386:A:G	ENSG00000160752	FDPS	chr1:155319688:155320409:clu_28785_?:ENSG00000160752	A	G	-13362	0.557292	68	85	1.1451e-11	0.919875	0.117823	1.72769e-34	4.92057e-24	1.90024e-05
1	155296544	1:155296544:C:T	ENSG00000160752	FDPS	chr1:155319688:155320409:clu_28785_?:ENSG00000160752	T	C	-12204	0.489583	75	94	4.82972e-12	0.957403	0.119807	1.72769e-34	4.92057e-24	1.90024e-05
1	155298329	1:155298329:T:C	ENSG00000160752	FDPS	chr1:155319928:155320409:clu_28785_?:ENSG00000160752	T	C	-10419	0.546875	69	87	7.15168e-07	-0.719008	0.134615	1.72769e-34	4.92057e-24	1.90024e-05
1	155298329	1:155298329:T:C	ENSG00000160752	FDPS	chr1:155319688:155320409:clu_28785_?:ENSG00000160752	T	C	-10419	0.546875	69	87	4.18785e-13	0.953157	0.112009	1.72769e-34	4.92057e-24	1.90024e-05
1	155298634	1:155298634:C:T	ENSG00000160752	FDPS	chr1:155319688:155320409:clu_28785_?:ENSG00000160752	C	T	-10114	0.505208	74	95	7.37026e-08	0.741555	0.126207	1.72769e-34	4.92057e-24	1.90024e-05
1	155299045	1:155299045:T:C	ENSG00000160752	FDPS	chr1:155319688:155320409:clu_28785_?:ENSG00000160752	C	T	-9703	0.385417	58	74	5.05329e-06	0.588578	0.121073	1.72769e-34	4.92057e-24	1.90024e-05
1	155299049	1:155299050:T:C	ENSG00000160752	FDPS	chr1:155319688:155320409:clu_28785_?:ENSG00000160752	C	T	-9699	0.484375	73	93	8.81871e-09	0.791348	0.124456	1.72769e-34	4.92057e-24	1.90024e-05
1	155299167	1:155299167:C:T	ENSG00000160752	FDPS	chr1:155319688:155320409:clu_28785_?:ENSG00000160752	C	T	-9581	0.557292	67	85	1.47509e-10	0.85699	0.118072	1.72769e-34	4.92057e-24	1.90024e-05
1	155299985	1:155299985:A:G	ENSG00000160752	FDPS	chr1:155319688:155320409:clu_28785_?:ENSG00000160752	A	G	-8763	0.541667	70	88	5.56319e-12	0.915605	0.115009	1.72769e-34	4.92057e-24	1.90024e-05
1	155302483	1:155302483:C:T	ENSG00000160752	FDPS	chr1:155319688:155320409:clu_28785_?:ENSG00000160752	T	C	-6265	0.46875	72	90	1.03081e-12	0.980182	0.117824	1.72769e-34	4.92057e-24	1.90024e-05
1	155304078	1:155304078:G:A	ENSG00000160752	FDPS	chr1:155319688:155320409:clu_28785_?:ENSG00000160752	A	G	-4670	0.317708	48	61	5.38745e-13	-1.19158	0.140909	1.72769e-34	4.92057e-24	1.90024e-05
1	155305169	1:155305169:G:C	ENSG00000160752	FDPS	chr1:155319688:155320409:clu_28785_?:ENSG00000160752	C	G	-3579	0.447917	67	86	2.91585e-10	0.841456	0.118341	1.72769e-34	4.92057e-24	1.90024e-05
1	155305169	1:155305169:G:C	ENSG00000160752	FDPS	chr1:155319928:155320409:clu_28785_?:ENSG00000160752	C	G	-3579	0.447917	67	86	9.60787e-06	-0.639	0.136001	1.72769e-34	4.92057e-24	1.90024e-05
1	155305762	1:155305762:C:T	ENSG00000160752	FDPS	chr1:155319928:155320409:clu_28785_?:ENSG00000160752	C	T	-2986	0.5625	68	84	8.8468e-06	-0.700207	0.148362	1.72769e-34	4.92057e-24	1.90024e-05
1	155305762	1:155305762:C:T	ENSG00000160752	FDPS	chr1:155319688:155320409:clu_28785_?:ENSG00000160752	C	T	-2986	0.5625	68	84	3.40856e-12	0.991588	0.122944	1.72769e-34	4.92057e-24	1.90024e-05
1	155305936	1:155305936:C:T	ENSG00000160752	FDPS	chr1:155319688:155320409:clu_28785_?:ENSG00000160752	T	C	-2812	0.421875	64	81	1.6078e-12	0.954601	0.116063	1.72769e-34	4.92057e-24	1.90024e-05
1	155305936	1:155305936:C:T	ENSG00000160752	FDPS	chr1:155319928:155320409:clu_28785_?:ENSG00000160752	T	C	-2812	0.421875	64	81	5.94451e-06	-0.677899	0.14063	1.72769e-34	4.92057e-24	1.90024e-05
1	155308172	1:155308172:C:T	ENSG00000160752	FDPS	chr1:155319928:155320409:clu_28785_?:ENSG00000160752	C	T	-576	0.567708	67	83	5.07258e-06	-0.69326	0.142635	1.72769e-34	4.92057e-24	1.90024e-05
1	155308172	1:155308172:C:T	ENSG00000160752	FDPS	chr1:155319688:155320409:clu_28785_?:ENSG00000160752	C	T	-576	0.567708	67	83	8.04617e-13	0.979556	0.11701	1.72769e-34	4.92057e-24	1.90024e-05
1	155309691	1:155309691:T:G	ENSG00000160752	FDPS	chr1:155319688:155320409:clu_28785_?:ENSG00000160752	G	T	943	0.421875	64	81	9.07463e-15	1.01682	0.109121	1.72769e-34	4.92057e-24	1.90024e-05
1	155309691	1:155309691:T:G	ENSG00000160752	FDPS	chr1:155319928:155320409:clu_28785_?:ENSG00000160752	G	T	943	0.421875	64	81	7.05751e-09	-0.833668	0.13009	1.72769e-34	4.92057e-24	1.90024e-05
1	155310373	1:155310373:T:C	ENSG00000160752	FDPS	chr1:155319688:155320409:clu_28785_?:ENSG00000160752	C	T	1625	0.421875	64	81	9.07463e-15	1.01682	0.109121	1.72769e-34	4.92057e-24	1.90024e-05
1	155310373	1:155310373:T:C	ENSG00000160752	FDPS	chr1:155319928:155320409:clu_28785_?:ENSG00000160752	C	T	1625	0.421875	64	81	7.05751e-09	-0.833668	0.13009	1.72769e-34	4.92057e-24	1.90024e-05
1	155313038	1:155313038:A:G	ENSG00000160752	FDPS	chr1:155319688:155320409:clu_28785_?:ENSG00000160752	A	G	4290	0.572917	65	82	8.62394e-14	0.981661	0.111005	1.72769e-34	4.92057e-24	1.90024e-05
1	155313038	1:155313038:A:G	ENSG00000160752	FDPS	chr1:155319928:155320409:clu_28785_?:ENSG00000160752	A	G	4290	0.572917	65	82	3.58511e-06	-0.683807	0.138221	1.72769e-34	4.92057e-24	1.90024e-05
1	155314470	1:155314470:C:T	ENSG00000160752	FDPS	chr1:155319928:155320409:clu_28785_?:ENSG00000160752	T	C	5722	0.390625	59	75	7.63294e-12	-1.00192	0.126926	1.72769e-34	4.92057e-24	1.90024e-05
1	155314470	1:155314470:C:T	ENSG00000160752	FDPS	chr1:155319688:155320409:clu_28785_?:ENSG00000160752	T	C	5722	0.390625	59	75	1.72769e-34	1.3754	0.0687702	1.72769e-34	4.92057e-24	1.90024e-05
1	155314795	1:155314795:T:A	ENSG00000160752	FDPS	chr1:155319688:155320409:clu_28785_?:ENSG00000160752	A	T	6047	0.390625	59	75	1.72769e-34	1.3754	0.0687702	1.72769e-34	4.92057e-24	1.90024e-05
1	155314795	1:155314795:T:A	ENSG00000160752	FDPS	chr1:155319928:155320409:clu_28785_?:ENSG00000160752	A	T	6047	0.390625	59	75	7.63294e-12	-1.00192	0.126926	1.72769e-34	4.92057e-24	1.90024e-05
1	155316063	1:155316063:T:C	ENSG00000160752	FDPS	chr1:155319928:155320409:clu_28785_?:ENSG00000160752	T	C	7315	0.526042	71	91	2.95668e-07	-0.717984	0.129331	1.72769e-34	4.92057e-24	1.90024e-05
1	155316063	1:155316063:T:C	ENSG00000160752	FDPS	chr1:155319688:155320409:clu_28785_?:ENSG00000160752	T	C	7315	0.526042	71	91	1.89989e-16	1.01004	0.0996582	1.72769e-34	4.92057e-24	1.90024e-05
1	155316467	1:155316467:C:T	ENSG00000160752	FDPS	chr1:155319688:155320409:clu_28785_?:ENSG00000160752	T	C	7719	0.390625	59	75	1.72769e-34	1.3754	0.0687702	1.72769e-34	4.92057e-24	1.90024e-05
1	155316467	1:155316467:C:T	ENSG00000160752	FDPS	chr1:155319928:155320409:clu_28785_?:ENSG00000160752	T	C	7719	0.390625	59	75	7.63294e-12	-1.00192	0.126926	1.72769e-34	4.92057e-24	1.90024e-05
1	155319754	1:155319754:T:G	ENSG00000160752	FDPS	chr1:155319928:155320409:clu_28785_?:ENSG00000160752	G	T	11006	0.390625	59	75	7.63294e-12	-1.00192	0.126926	1.72769e-34	4.92057e-24	1.90024e-05
1	155319754	1:155319754:T:G	ENSG00000160752	FDPS	chr1:155319688:155320409:clu_28785_?:ENSG00000160752	G	T	11006	0.390625	59	75	1.72769e-34	1.3754	0.0687702	1.72769e-34	4.92057e-24	1.90024e-05
1	155334451	1:155334451:A:G	ENSG00000160752	FDPS	chr1:155319688:155320409:clu_28785_?:ENSG00000160752	G	A	25703	0.338542	52	65	1.11586e-17	1.17416	0.10935	1.72769e-34	4.92057e-24	1.90024e-05
1	155334451	1:155334451:A:G	ENSG00000160752	FDPS	chr1:155319928:155320409:clu_28785_?:ENSG00000160752	G	A	25703	0.338542	52	65	3.86979e-07	-0.80643	0.146949	1.72769e-34	4.92057e-24	1.90024e-05
1	155334536	1:155334536:T:G	ENSG00000160752	FDPS	chr1:155319928:155320409:clu_28785_?:ENSG00000160752	G	T	25788	0.453125	69	87	9.40078e-07	-0.718846	0.136264	1.72769e-34	4.92057e-24	1.90024e-05
1	155334536	1:155334536:T:G	ENSG00000160752	FDPS	chr1:155319688:155320409:clu_28785_?:ENSG00000160752	G	T	25788	0.453125	69	87	4.57115e-15	1.01677	0.107449	1.72769e-34	4.92057e-24	1.90024e-05
1	155334790	1:155334790:C:A	ENSG00000160752	FDPS	chr1:155319688:155320409:clu_28785_?:ENSG00000160752	A	C	26042	0.458333	69	88	1.9747e-14	0.978609	0.106902	1.72769e-34	4.92057e-24	1.90024e-05
1	155334790	1:155334790:C:A	ENSG00000160752	FDPS	chr1:155319928:155320409:clu_28785_?:ENSG00000160752	A	C	26042	0.458333	69	88	5.68999e-07	-0.715643	0.132624	1.72769e-34	4.92057e-24	1.90024e-05
1	155345824	1:155345824:C:T	ENSG00000160752	FDPS	chr1:155319688:155320409:clu_28785_?:ENSG00000160752	T	C	37076	0.364583	56	70	6.69325e-11	-0.917687	0.123531	1.72769e-34	4.92057e-24	1.90024e-05
1	155348517	1:155348517:G:C	ENSG00000160752	FDPS	chr1:155319688:155320409:clu_28785_?:ENSG00000160752	C	G	39769	0.348958	53	67	3.57505e-12	-0.98705	0.122536	1.72769e-34	4.92057e-24	1.90024e-05
1	155348517	1:155348517:G:C	ENSG00000160752	FDPS	chr1:155319928:155320409:clu_28785_?:ENSG00000160752	C	G	39769	0.348958	53	67	6.54092e-06	0.70651	0.147303	1.72769e-34	4.92057e-24	1.90024e-05
1	155349877	1:155349877:C:T	ENSG00000160752	FDPS	chr1:155319688:155320409:clu_28785_?:ENSG00000160752	T	C	41129	0.364583	56	70	6.69325e-11	-0.917687	0.123531	1.72769e-34	4.92057e-24	1.90024e-05
1	155350701	1:155350701:T:A	ENSG00000160752	FDPS	chr1:155319928:155320409:clu_28785_?:ENSG00000160752	A	T	41953	0.348958	54	67	5.90686e-08	-0.928159	0.156607	1.72769e-34	4.92057e-24	1.90024e-05
1	155350701	1:155350701:T:A	ENSG00000160752	FDPS	chr1:155319688:155320409:clu_28785_?:ENSG00000160752	A	T	41953	0.348958	54	67	6.41081e-20	1.33007	0.112257	1.72769e-34	4.92057e-24	1.90024e-05
1	155351758	1:155351758:G:A	ENSG00000160752	FDPS	chr1:155319688:155320409:clu_28785_?:ENSG00000160752	A	G	43010	0.354167	53	68	7.16178e-22	1.29261	0.100695	1.72769e-34	4.92057e-24	1.90024e-05
1	155351758	1:155351758:G:A	ENSG00000160752	FDPS	chr1:155319928:155320409:clu_28785_?:ENSG00000160752	A	G	43010	0.354167	53	68	2.02783e-07	-0.845024	0.149819	1.72769e-34	4.92057e-24	1.90024e-05
1	155351887	1:155351887:A:T	ENSG00000160752	FDPS	chr1:155319688:155320409:clu_28785_?:ENSG00000160752	T	A	43139	0.359375	55	69	4.07983e-23	1.36231	0.101065	1.72769e-34	4.92057e-24	1.90024e-05
1	155351887	1:155351887:A:T	ENSG00000160752	FDPS	chr1:155319928:155320409:clu_28785_?:ENSG00000160752	T	A	43139	0.359375	55	69	1.86166e-08	-0.936358	0.151267	1.72769e-34	4.92057e-24	1.90024e-05
1	155352351	1:155352351:G:A	ENSG00000160752	FDPS	chr1:155319928:155320409:clu_28785_?:ENSG00000160752	A	G	43603	0.364583	55	70	1.39358e-08	-0.903284	0.144398	1.72769e-34	4.92057e-24	1.90024e-05
1	155352351	1:155352351:G:A	ENSG00000160752	FDPS	chr1:155319688:155320409:clu_28785_?:ENSG00000160752	A	G	43603	0.364583	55	70	1.93424e-23	1.3099	0.0959731	1.72769e-34	4.92057e-24	1.90024e-05
1	155358605	1:155358605:G:A	ENSG00000160752	FDPS	chr1:155319928:155320409:clu_28785_?:ENSG00000160752	A	G	49857	0.364583	56	70	3.16227e-08	-0.908182	0.149624	1.72769e-34	4.92057e-24	1.90024e-05
1	155358605	1:155358605:G:A	ENSG00000160752	FDPS	chr1:155319688:155320409:clu_28785_?:ENSG00000160752	A	G	49857	0.364583	56	70	1.54719e-21	1.31155	0.10355	1.72769e-34	4.92057e-24	1.90024e-05
1	155363203	1:155363203:G:A	ENSG00000160752	FDPS	chr1:155319928:155320409:clu_28785_?:ENSG00000160752	A	G	54455	0.375	57	72	9.41237e-08	-0.8464	0.14545	1.72769e-34	4.92057e-24	1.90024e-05
1	155363203	1:155363203:G:A	ENSG00000160752	FDPS	chr1:155319688:155320409:clu_28785_?:ENSG00000160752	A	G	54455	0.375	57	72	1.58018e-20	1.2409	0.102097	1.72769e-34	4.92057e-24	1.90024e-05
1	155364745	1:155364745:G:A	ENSG00000160752	FDPS	chr1:155319928:155320409:clu_28785_?:ENSG00000160752	A	G	55997	0.375	57	72	9.41237e-08	-0.8464	0.14545	1.72769e-34	4.92057e-24	1.90024e-05
1	155364745	1:155364745:G:A	ENSG00000160752	FDPS	chr1:155319688:155320409:clu_28785_?:ENSG00000160752	A	G	55997	0.375	57	72	1.58018e-20	1.2409	0.102097	1.72769e-34	4.92057e-24	1.90024e-05
1	155365620	1:155365620:A:T	ENSG00000160752	FDPS	chr1:155319928:155320409:clu_28785_?:ENSG00000160752	T	A	56872	0.458333	70	88	2.79808e-06	-0.691545	0.138067	1.72769e-34	4.92057e-24	1.90024e-05
1	155365620	1:155365620:A:T	ENSG00000160752	FDPS	chr1:155319688:155320409:clu_28785_?:ENSG00000160752	T	A	56872	0.458333	70	88	3.049e-14	0.995924	0.109893	1.72769e-34	4.92057e-24	1.90024e-05
1	155367547	1:155367547:T:C	ENSG00000160752	FDPS	chr1:155319928:155320409:clu_28785_?:ENSG00000160752	C	T	58799	0.375	57	72	9.41237e-08	-0.8464	0.14545	1.72769e-34	4.92057e-24	1.90024e-05
1	155367547	1:155367547:T:C	ENSG00000160752	FDPS	chr1:155319688:155320409:clu_28785_?:ENSG00000160752	C	T	58799	0.375	57	72	1.58018e-20	1.2409	0.102097	1.72769e-34	4.92057e-24	1.90024e-05
1	155375252	1:155375252:A:G	ENSG00000160752	FDPS	chr1:155319688:155320409:clu_28785_?:ENSG00000160752	G	A	66504	0.375	57	72	1.58018e-20	1.2409	0.102097	1.72769e-34	4.92057e-24	1.90024e-05
1	155375252	1:155375252:A:G	ENSG00000160752	FDPS	chr1:155319928:155320409:clu_28785_?:ENSG00000160752	G	A	66504	0.375	57	72	9.41237e-08	-0.8464	0.14545	1.72769e-34	4.92057e-24	1.90024e-05
1	155376951	1:155376951:A:G	ENSG00000160752	FDPS	chr1:155319928:155320409:clu_28785_?:ENSG00000160752	G	A	68203	0.375	57	72	9.41237e-08	-0.8464	0.14545	1.72769e-34	4.92057e-24	1.90024e-05
1	155376951	1:155376951:A:G	ENSG00000160752	FDPS	chr1:155319688:155320409:clu_28785_?:ENSG00000160752	G	A	68203	0.375	57	72	1.58018e-20	1.2409	0.102097	1.72769e-34	4.92057e-24	1.90024e-05
1	155386573	1:155386573:T:C	ENSG00000160752	FDPS	chr1:155319688:155320409:clu_28785_?:ENSG00000160752	C	T	77825	0.359375	56	69	2.01831e-10	-0.905538	0.125939	1.72769e-34	4.92057e-24	1.90024e-05
1	155387818	1:155387818:G:A	ENSG00000160752	FDPS	chr1:155319688:155320409:clu_28785_?:ENSG00000160752	A	G	79070	0.380208	58	73	1.19427e-21	1.24858	0.0981339	1.72769e-34	4.92057e-24	1.90024e-05
1	155387818	1:155387818:G:A	ENSG00000160752	FDPS	chr1:155319928:155320409:clu_28785_?:ENSG00000160752	A	G	79070	0.380208	58	73	3.88427e-08	-0.858479	0.142538	1.72769e-34	4.92057e-24	1.90024e-05
1	155389191	1:155389191:A:G	ENSG00000160752	FDPS	chr1:155319688:155320409:clu_28785_?:ENSG00000160752	G	A	80443	0.380208	58	73	1.19427e-21	1.24858	0.0981339	1.72769e-34	4.92057e-24	1.90024e-05
1	155389191	1:155389191:A:G	ENSG00000160752	FDPS	chr1:155319928:155320409:clu_28785_?:ENSG00000160752	G	A	80443	0.380208	58	73	3.88427e-08	-0.858479	0.142538	1.72769e-34	4.92057e-24	1.90024e-05
1	155389659	1:155389659:C:T	ENSG00000160752	FDPS	chr1:155319688:155320409:clu_28785_?:ENSG00000160752	T	C	80911	0.375	57	72	1.58018e-20	1.2409	0.102097	1.72769e-34	4.92057e-24	1.90024e-05
1	155389659	1:155389659:C:T	ENSG00000160752	FDPS	chr1:155319928:155320409:clu_28785_?:ENSG00000160752	T	C	80911	0.375	57	72	9.41237e-08	-0.8464	0.14545	1.72769e-34	4.92057e-24	1.90024e-05
1	155390039	1:155390039:T:C	ENSG00000160752	FDPS	chr1:155319688:155320409:clu_28785_?:ENSG00000160752	C	T	81291	0.359375	56	69	2.01831e-10	-0.905538	0.125939	1.72769e-34	4.92057e-24	1.90024e-05
1	155390787	1:155390787:G:A	ENSG00000160752	FDPS	chr1:155319928:155320409:clu_28785_?:ENSG00000160752	A	G	82039	0.5	74	96	3.9459e-07	-0.709314	0.129361	1.72769e-34	4.92057e-24	1.90024e-05
1	155390787	1:155390787:G:A	ENSG00000160752	FDPS	chr1:155319688:155320409:clu_28785_?:ENSG00000160752	A	G	82039	0.5	74	96	5.42284e-14	0.946767	0.105887	1.72769e-34	4.92057e-24	1.90024e-05
1	155394536	1:155394536:T:C	ENSG00000160752	FDPS	chr1:155319688:155320409:clu_28785_?:ENSG00000160752	C	T	85788	0.385417	57	74	9.3294e-18	1.17187	0.108751	1.72769e-34	4.92057e-24	1.90024e-05
1	155394536	1:155394536:T:C	ENSG00000160752	FDPS	chr1:155319928:155320409:clu_28785_?:ENSG00000160752	C	T	85788	0.385417	57	74	1.81298e-07	-0.822879	0.145217	1.72769e-34	4.92057e-24	1.90024e-05
1	155398412	1:155398412:C:A	ENSG00000160752	FDPS	chr1:155319688:155320409:clu_28785_?:ENSG00000160752	A	C	89664	0.333333	51	64	3.203e-10	-0.910947	0.128483	1.72769e-34	4.92057e-24	1.90024e-05
1	155399511	1:155399511:C:T	ENSG00000160752	FDPS	chr1:155319688:155320409:clu_28785_?:ENSG00000160752	T	C	90763	0.364583	55	70	4.43043e-19	1.2173	0.106504	1.72769e-34	4.92057e-24	1.90024e-05
1	155399511	1:155399511:C:T	ENSG00000160752	FDPS	chr1:155319928:155320409:clu_28785_?:ENSG00000160752	T	C	90763	0.364583	55	70	1.14619e-06	-0.785208	0.15021	1.72769e-34	4.92057e-24	1.90024e-05
1	155401656	1:155401656:T:C	ENSG00000160752	FDPS	chr1:155319688:155320409:clu_28785_?:ENSG00000160752	T	C	92908	0.510417	72	94	2.11338e-12	0.892257	0.109254	1.72769e-34	4.92057e-24	1.90024e-05
1	155401656	1:155401656:T:C	ENSG00000160752	FDPS	chr1:155319928:155320409:clu_28785_?:ENSG00000160752	T	C	92908	0.510417	72	94	7.08717e-07	-0.688924	0.12893	1.72769e-34	4.92057e-24	1.90024e-05
1	155402881	1:155402881:T:C	ENSG00000160752	FDPS	chr1:155319688:155320409:clu_28785_?:ENSG00000160752	C	T	94133	0.348958	54	67	3.64197e-09	-0.843312	0.128635	1.72769e-34	4.92057e-24	1.90024e-05
1	159110266	1:159110266:C:T	ENSG00000163568	AIM2	chr1:159062718:159063486:clu_28976_?:ENSG00000163568	T	C	-36830	0.0572917	9	11	2.922e-09	-0.804976	0.121878	2.922e-09	0.0311677	6.30741e-06
1	159110453	1:159110453:C:T	ENSG00000163568	AIM2	chr1:159062718:159063486:clu_28976_?:ENSG00000163568	T	C	-36643	0.0572917	9	11	2.922e-09	-0.804976	0.121878	2.922e-09	0.0311677	6.30741e-06
1	159112580	1:159112580:C:T	ENSG00000163568	AIM2	chr1:159062718:159063486:clu_28976_?:ENSG00000163568	T	C	-34516	0.0572917	9	11	2.922e-09	-0.804976	0.121878	2.922e-09	0.0311677	6.30741e-06
1	159114938	1:159114938:C:T	ENSG00000163568	AIM2	chr1:159062718:159063486:clu_28976_?:ENSG00000163568	T	C	-32158	0.0572917	9	11	2.922e-09	-0.804976	0.121878	2.922e-09	0.0311677	6.30741e-06
1	159115901	1:159115901:C:G	ENSG00000163568	AIM2	chr1:159062718:159063486:clu_28976_?:ENSG00000163568	G	C	-31195	0.0572917	9	11	2.922e-09	-0.804976	0.121878	2.922e-09	0.0311677	6.30741e-06
1	159116642	1:159116642:G:A	ENSG00000163568	AIM2	chr1:159062718:159063486:clu_28976_?:ENSG00000163568	A	G	-30454	0.0625	10	12	2.15522e-08	-0.735247	0.119418	2.922e-09	0.0311677	6.30741e-06
1	159117287	1:159117287:T:A	ENSG00000163568	AIM2	chr1:159062718:159063486:clu_28976_?:ENSG00000163568	A	T	-29809	0.0572917	9	11	2.922e-09	-0.804976	0.121878	2.922e-09	0.0311677	6.30741e-06
1	159119765	1:159119765:A:T	ENSG00000163568	AIM2	chr1:159062718:159063486:clu_28976_?:ENSG00000163568	T	A	-27331	0.0572917	9	11	2.922e-09	-0.804976	0.121878	2.922e-09	0.0311677	6.30741e-06
1	159120767	1:159120767:A:G	ENSG00000163568	AIM2	chr1:159062718:159063486:clu_28976_?:ENSG00000163568	G	A	-26329	0.0572917	9	11	2.922e-09	-0.804976	0.121878	2.922e-09	0.0311677	6.30741e-06
1	159121308	1:159121308:G:A	ENSG00000163568	AIM2	chr1:159062718:159063486:clu_28976_?:ENSG00000163568	A	G	-25788	0.0572917	9	11	2.922e-09	-0.804976	0.121878	2.922e-09	0.0311677	6.30741e-06
1	159122571	1:159122571:A:G	ENSG00000163568	AIM2	chr1:159062718:159063486:clu_28976_?:ENSG00000163568	G	A	-24525	0.0572917	9	11	2.922e-09	-0.804976	0.121878	2.922e-09	0.0311677	6.30741e-06
1	159123842	1:159123842:C:T	ENSG00000163568	AIM2	chr1:159062718:159063486:clu_28976_?:ENSG00000163568	T	C	-23254	0.0572917	9	11	2.922e-09	-0.804976	0.121878	2.922e-09	0.0311677	6.30741e-06
1	159163163	1:159163163:A:T	ENSG00000163568	AIM2	chr1:159062718:159063486:clu_28976_?:ENSG00000163568	T	A	16067	0.0833333	14	16	3.382e-06	-0.646253	0.130248	2.922e-09	0.0311677	6.30741e-06
1	159167143	1:159167143:C:T	ENSG00000163568	AIM2	chr1:159062718:159063486:clu_28976_?:ENSG00000163568	T	C	20047	0.0833333	14	16	3.382e-06	-0.646253	0.130248	2.922e-09	0.0311677	6.30741e-06
1	161658550	1:161658550:C:T	ENSG00000072694	FCGR2B	chr1:161674073:161675257:clu_29106_?:ENSG00000072694	T	C	-4597	0.0520833	10	10	1.01087e-05	-1.49133	0.318285	6.24285e-08	0.00639564	1.77523e-05
1	161672103	1:161672103:G:A	ENSG00000072694	FCGR2B	chr1:161674073:161675257:clu_29106_?:ENSG00000072694	A	G	8956	0.09375	17	18	2.33705e-07	-1.3005	0.231945	6.24285e-08	0.00639564	1.77523e-05
1	161673195	1:161673195:G:A	ENSG00000072694	FCGR2B	chr1:161674073:161675257:clu_29106_?:ENSG00000072694	A	G	10048	0.09375	17	18	1.15791e-05	-1.12273	0.241412	6.24285e-08	0.00639564	1.77523e-05
1	161676104	1:161676104:T:C	ENSG00000072694	FCGR2B	chr1:161674073:161675257:clu_29106_?:ENSG00000072694	C	T	12957	0.0989583	18	19	6.24284e-08	-1.32701	0.224387	6.24285e-08	0.00639564	1.77523e-05
1	161676105	1:161676105:C:T	ENSG00000072694	FCGR2B	chr1:161674073:161675257:clu_29106_?:ENSG00000072694	T	C	12958	0.0989583	18	19	6.24284e-08	-1.32701	0.224387	6.24285e-08	0.00639564	1.77523e-05
1	161677017	1:161677017:C:T	ENSG00000072694	FCGR2B	chr1:161674073:161675257:clu_29106_?:ENSG00000072694	T	C	13870	0.0989583	18	19	6.24284e-08	-1.32701	0.224387	6.24285e-08	0.00639564	1.77523e-05
1	161682517	1:161682517:C:T	ENSG00000072694	FCGR2B	chr1:161674073:161675257:clu_29106_?:ENSG00000072694	T	C	19370	0.078125	14	15	4.04046e-06	-1.30793	0.265981	6.24285e-08	0.00639564	1.77523e-05
1	173769156	1:173769156:A:C	ENSG00000234741	GAS5	chr1:173865282:173865510:clu_29259_?:ENSG00000234741	C	A	-99726	0.182292	29	35	3.09098e-11	1.27574	0.167975	8.53911e-15	6.67115e-09	3.00025e-05
1	173769156	1:173769156:A:C	ENSG00000234741	GAS5	chr1:173865282:173865471:clu_29259_?:ENSG00000234741	C	A	-99726	0.182292	29	35	1.06751e-12	-1.4425	0.173552	8.53911e-15	6.67115e-09	3.00025e-05
1	173769560	1:173769560:G:C	ENSG00000234741	GAS5	chr1:173865282:173865471:clu_29259_?:ENSG00000234741	C	G	-99322	0.21875	33	42	3.51911e-06	0.776078	0.156725	8.53911e-15	6.67115e-09	3.00025e-05
1	173770809	1:173770809:G:A	ENSG00000234741	GAS5	chr1:173865282:173865471:clu_29259_?:ENSG00000234741	A	G	-98073	0.119792	19	23	2.94542e-05	0.907368	0.205885	8.53911e-15	6.67115e-09	3.00025e-05
1	173771151	1:173771151:C:G	ENSG00000234741	GAS5	chr1:173865282:173865471:clu_29259_?:ENSG00000234741	G	C	-97731	0.182292	29	35	1.06751e-12	-1.4425	0.173552	8.53911e-15	6.67115e-09	3.00025e-05
1	173771151	1:173771151:C:G	ENSG00000234741	GAS5	chr1:173865282:173865510:clu_29259_?:ENSG00000234741	G	C	-97731	0.182292	29	35	3.09098e-11	1.27574	0.167975	8.53911e-15	6.67115e-09	3.00025e-05
1	173775090	1:173775090:T:C	ENSG00000234741	GAS5	chr1:173865282:173865471:clu_29259_?:ENSG00000234741	C	T	-93792	0.395833	55	76	2.86161e-06	0.642497	0.128417	8.53911e-15	6.67115e-09	3.00025e-05
1	173775163	1:173775163:A:G	ENSG00000234741	GAS5	chr1:173865282:173865471:clu_29259_?:ENSG00000234741	G	A	-93719	0.21875	33	42	3.51911e-06	0.776078	0.156725	8.53911e-15	6.67115e-09	3.00025e-05
1	173776303	1:173776303:T:G	ENSG00000234741	GAS5	chr1:173865282:173865471:clu_29259_?:ENSG00000234741	G	T	-92579	0.182292	29	35	1.06751e-12	-1.4425	0.173552	8.53911e-15	6.67115e-09	3.00025e-05
1	173776303	1:173776303:T:G	ENSG00000234741	GAS5	chr1:173865282:173865510:clu_29259_?:ENSG00000234741	G	T	-92579	0.182292	29	35	3.09098e-11	1.27574	0.167975	8.53911e-15	6.67115e-09	3.00025e-05
1	173778137	1:173778137:A:G	ENSG00000234741	GAS5	chr1:173865282:173865471:clu_29259_?:ENSG00000234741	G	A	-90745	0.21875	33	42	3.51911e-06	0.776078	0.156725	8.53911e-15	6.67115e-09	3.00025e-05
1	173779411	1:173779411:T:C	ENSG00000234741	GAS5	chr1:173865282:173865471:clu_29259_?:ENSG00000234741	C	T	-89471	0.395833	55	76	2.86161e-06	0.642497	0.128417	8.53911e-15	6.67115e-09	3.00025e-05
1	173779498	1:173779498:G:A	ENSG00000234741	GAS5	chr1:173865282:173865471:clu_29259_?:ENSG00000234741	A	G	-89384	0.21875	33	42	3.51911e-06	0.776078	0.156725	8.53911e-15	6.67115e-09	3.00025e-05
1	173780806	1:173780806:T:C	ENSG00000234741	GAS5	chr1:173865282:173865471:clu_29259_?:ENSG00000234741	C	T	-88076	0.21875	33	42	3.51911e-06	0.776078	0.156725	8.53911e-15	6.67115e-09	3.00025e-05
1	173788886	1:173788886:T:C	ENSG00000234741	GAS5	chr1:173865282:173865471:clu_29259_?:ENSG00000234741	C	T	-79996	0.395833	55	76	2.86161e-06	0.642497	0.128417	8.53911e-15	6.67115e-09	3.00025e-05
1	173792170	1:173792170:C:T	ENSG00000234741	GAS5	chr1:173865282:173865471:clu_29259_?:ENSG00000234741	T	C	-76712	0.21875	33	42	3.51911e-06	0.776078	0.156725	8.53911e-15	6.67115e-09	3.00025e-05
1	173795276	1:173795276:A:G	ENSG00000234741	GAS5	chr1:173865282:173865471:clu_29259_?:ENSG00000234741	G	A	-73606	0.182292	29	35	1.06751e-12	-1.4425	0.173552	8.53911e-15	6.67115e-09	3.00025e-05
1	173795276	1:173795276:A:G	ENSG00000234741	GAS5	chr1:173865282:173865510:clu_29259_?:ENSG00000234741	G	A	-73606	0.182292	29	35	3.09098e-11	1.27574	0.167975	8.53911e-15	6.67115e-09	3.00025e-05
1	173796530	1:173796530:C:T	ENSG00000234741	GAS5	chr1:173865282:173865471:clu_29259_?:ENSG00000234741	T	C	-72352	0.489583	61	94	1.92056e-06	0.719133	0.140965	8.53911e-15	6.67115e-09	3.00025e-05
1	173796548	1:173796548:T:C	ENSG00000234741	GAS5	chr1:173865282:173865471:clu_29259_?:ENSG00000234741	C	T	-72334	0.21875	33	42	3.51911e-06	0.776078	0.156725	8.53911e-15	6.67115e-09	3.00025e-05
1	173797401	1:173797401:T:G	ENSG00000234741	GAS5	chr1:173865282:173865471:clu_29259_?:ENSG00000234741	G	T	-71481	0.244792	38	47	6.20042e-06	0.7254	0.150817	8.53911e-15	6.67115e-09	3.00025e-05
1	173797886	1:173797886:T:A	ENSG00000234741	GAS5	chr1:173865282:173865471:clu_29259_?:ENSG00000234741	A	T	-70996	0.395833	55	76	2.86161e-06	0.642497	0.128417	8.53911e-15	6.67115e-09	3.00025e-05
1	173799688	1:173799688:C:G	ENSG00000234741	GAS5	chr1:173865282:173865510:clu_29259_?:ENSG00000234741	G	C	-69194	0.182292	29	35	3.09098e-11	1.27574	0.167975	8.53911e-15	6.67115e-09	3.00025e-05
1	173799688	1:173799688:C:G	ENSG00000234741	GAS5	chr1:173865282:173865471:clu_29259_?:ENSG00000234741	G	C	-69194	0.182292	29	35	1.06751e-12	-1.4425	0.173552	8.53911e-15	6.67115e-09	3.00025e-05
1	173804518	1:173804518:C:G	ENSG00000234741	GAS5	chr1:173865282:173865471:clu_29259_?:ENSG00000234741	G	C	-64364	0.489583	61	94	1.92056e-06	0.719133	0.140965	8.53911e-15	6.67115e-09	3.00025e-05
1	173805138	1:173805138:C:A	ENSG00000234741	GAS5	chr1:173865282:173865471:clu_29259_?:ENSG00000234741	A	C	-63744	0.21875	33	42	3.51911e-06	0.776078	0.156725	8.53911e-15	6.67115e-09	3.00025e-05
1	173805814	1:173805814:C:T	ENSG00000234741	GAS5	chr1:173865282:173865471:clu_29259_?:ENSG00000234741	T	C	-63068	0.213542	32	41	6.98159e-06	0.759836	0.158969	8.53911e-15	6.67115e-09	3.00025e-05
1	173806351	1:173806351:C:T	ENSG00000234741	GAS5	chr1:173865282:173865510:clu_29259_?:ENSG00000234741	T	C	-62531	0.182292	29	35	3.09098e-11	1.27574	0.167975	8.53911e-15	6.67115e-09	3.00025e-05
1	173806351	1:173806351:C:T	ENSG00000234741	GAS5	chr1:173865282:173865471:clu_29259_?:ENSG00000234741	T	C	-62531	0.182292	29	35	1.06751e-12	-1.4425	0.173552	8.53911e-15	6.67115e-09	3.00025e-05
1	173810981	1:173810981:A:G	ENSG00000234741	GAS5	chr1:173865282:173865471:clu_29259_?:ENSG00000234741	G	A	-57901	0.489583	61	94	1.92056e-06	0.719133	0.140965	8.53911e-15	6.67115e-09	3.00025e-05
1	173811688	1:173811688:T:G	ENSG00000234741	GAS5	chr1:173865282:173865471:clu_29259_?:ENSG00000234741	G	T	-57194	0.395833	55	76	2.86161e-06	0.642497	0.128417	8.53911e-15	6.67115e-09	3.00025e-05
1	173812869	1:173812869:A:C	ENSG00000234741	GAS5	chr1:173865282:173865471:clu_29259_?:ENSG00000234741	C	A	-56013	0.21875	33	42	3.51911e-06	0.776078	0.156725	8.53911e-15	6.67115e-09	3.00025e-05
1	173813143	1:173813143:C:T	ENSG00000234741	GAS5	chr1:173865282:173865471:clu_29259_?:ENSG00000234741	T	C	-55739	0.21875	33	42	3.51911e-06	0.776078	0.156725	8.53911e-15	6.67115e-09	3.00025e-05
1	173814279	1:173814279:C:T	ENSG00000234741	GAS5	chr1:173865282:173865471:clu_29259_?:ENSG00000234741	T	C	-54603	0.21875	33	42	3.51911e-06	0.776078	0.156725	8.53911e-15	6.67115e-09	3.00025e-05
1	173815386	1:173815386:A:T	ENSG00000234741	GAS5	chr1:173865282:173865471:clu_29259_?:ENSG00000234741	T	A	-53496	0.21875	33	42	3.51911e-06	0.776078	0.156725	8.53911e-15	6.67115e-09	3.00025e-05
1	173820226	1:173820226:C:T	ENSG00000234741	GAS5	chr1:173865282:173865471:clu_29259_?:ENSG00000234741	T	C	-48656	0.21875	33	42	3.51911e-06	0.776078	0.156725	8.53911e-15	6.67115e-09	3.00025e-05
1	173821939	1:173821939:A:G	ENSG00000234741	GAS5	chr1:173865282:173865471:clu_29259_?:ENSG00000234741	G	A	-46943	0.395833	55	76	2.86161e-06	0.642497	0.128417	8.53911e-15	6.67115e-09	3.00025e-05
1	173823772	1:173823772:C:G	ENSG00000234741	GAS5	chr1:173865282:173865471:clu_29259_?:ENSG00000234741	G	C	-45110	0.21875	33	42	3.51911e-06	0.776078	0.156725	8.53911e-15	6.67115e-09	3.00025e-05
1	173825659	1:173825659:C:T	ENSG00000234741	GAS5	chr1:173865282:173865471:clu_29259_?:ENSG00000234741	T	C	-43223	0.21875	33	42	3.51911e-06	0.776078	0.156725	8.53911e-15	6.67115e-09	3.00025e-05
1	173827031	1:173827031:A:G	ENSG00000234741	GAS5	chr1:173865282:173865510:clu_29259_?:ENSG00000234741	G	A	-41851	0.182292	29	35	3.09098e-11	1.27574	0.167975	8.53911e-15	6.67115e-09	3.00025e-05
1	173827031	1:173827031:A:G	ENSG00000234741	GAS5	chr1:173865282:173865471:clu_29259_?:ENSG00000234741	G	A	-41851	0.182292	29	35	1.06751e-12	-1.4425	0.173552	8.53911e-15	6.67115e-09	3.00025e-05
1	173828313	1:173828313:T:C	ENSG00000234741	GAS5	chr1:173865282:173865471:clu_29259_?:ENSG00000234741	C	T	-40569	0.21875	33	42	3.70981e-06	0.774685	0.15686	8.53911e-15	6.67115e-09	3.00025e-05
1	173828614	1:173828614:A:G	ENSG00000234741	GAS5	chr1:173865282:173865471:clu_29259_?:ENSG00000234741	G	A	-40268	0.182292	29	35	1.06751e-12	-1.4425	0.173552	8.53911e-15	6.67115e-09	3.00025e-05
1	173828614	1:173828614:A:G	ENSG00000234741	GAS5	chr1:173865282:173865510:clu_29259_?:ENSG00000234741	G	A	-40268	0.182292	29	35	3.09098e-11	1.27574	0.167975	8.53911e-15	6.67115e-09	3.00025e-05
1	173829600	1:173829600:C:T	ENSG00000234741	GAS5	chr1:173865282:173865471:clu_29259_?:ENSG00000234741	T	C	-39282	0.119792	19	23	2.94542e-05	0.907368	0.205885	8.53911e-15	6.67115e-09	3.00025e-05
1	173835332	1:173835332:C:T	ENSG00000234741	GAS5	chr1:173865282:173865471:clu_29259_?:ENSG00000234741	T	C	-33550	0.21875	33	42	3.51911e-06	0.776078	0.156725	8.53911e-15	6.67115e-09	3.00025e-05
1	173835419	1:173835419:A:C	ENSG00000234741	GAS5	chr1:173865282:173865471:clu_29259_?:ENSG00000234741	C	A	-33463	0.395833	55	76	2.86161e-06	0.642497	0.128417	8.53911e-15	6.67115e-09	3.00025e-05
1	173838981	1:173838981:C:T	ENSG00000234741	GAS5	chr1:173865282:173865510:clu_29259_?:ENSG00000234741	T	C	-29901	0.182292	29	35	3.09098e-11	1.27574	0.167975	8.53911e-15	6.67115e-09	3.00025e-05
1	173838981	1:173838981:C:T	ENSG00000234741	GAS5	chr1:173865282:173865471:clu_29259_?:ENSG00000234741	T	C	-29901	0.182292	29	35	1.06751e-12	-1.4425	0.173552	8.53911e-15	6.67115e-09	3.00025e-05
1	173842110	1:173842110:C:T	ENSG00000234741	GAS5	chr1:173865282:173865471:clu_29259_?:ENSG00000234741	T	C	-26772	0.182292	29	35	1.06751e-12	-1.4425	0.173552	8.53911e-15	6.67115e-09	3.00025e-05
1	173842110	1:173842110:C:T	ENSG00000234741	GAS5	chr1:173865282:173865510:clu_29259_?:ENSG00000234741	T	C	-26772	0.182292	29	35	3.09098e-11	1.27574	0.167975	8.53911e-15	6.67115e-09	3.00025e-05
1	173843327	1:173843327:G:C	ENSG00000234741	GAS5	chr1:173865282:173865471:clu_29259_?:ENSG00000234741	C	G	-25555	0.1875	30	36	1.05578e-13	-1.51631	0.172294	8.53911e-15	6.67115e-09	3.00025e-05
1	173843327	1:173843327:G:C	ENSG00000234741	GAS5	chr1:173865282:173865510:clu_29259_?:ENSG00000234741	C	G	-25555	0.1875	30	36	2.73446e-12	1.35116	0.16656	8.53911e-15	6.67115e-09	3.00025e-05
1	173844059	1:173844059:G:A	ENSG00000234741	GAS5	chr1:173865282:173865471:clu_29259_?:ENSG00000234741	A	G	-24823	0.197917	29	38	2.8421e-05	0.699078	0.158284	8.53911e-15	6.67115e-09	3.00025e-05
1	173845120	1:173845120:T:C	ENSG00000234741	GAS5	chr1:173865282:173865510:clu_29259_?:ENSG00000234741	C	T	-23762	0.1875	30	36	2.73446e-12	1.35116	0.16656	8.53911e-15	6.67115e-09	3.00025e-05
1	173845120	1:173845120:T:C	ENSG00000234741	GAS5	chr1:173865282:173865471:clu_29259_?:ENSG00000234741	C	T	-23762	0.1875	30	36	1.05578e-13	-1.51631	0.172294	8.53911e-15	6.67115e-09	3.00025e-05
1	173847448	1:173847448:C:T	ENSG00000234741	GAS5	chr1:173865282:173865471:clu_29259_?:ENSG00000234741	T	C	-21434	0.375	51	72	1.64825e-05	0.590809	0.129581	8.53911e-15	6.67115e-09	3.00025e-05
1	173849938	1:173849938:T:G	ENSG00000234741	GAS5	chr1:173865282:173865471:clu_29259_?:ENSG00000234741	G	T	-18944	0.380208	51	73	2.40541e-05	0.578734	0.129744	8.53911e-15	6.67115e-09	3.00025e-05
1	173851193	1:173851193:G:A	ENSG00000234741	GAS5	chr1:173865282:173865510:clu_29259_?:ENSG00000234741	A	G	-17689	0.192708	31	37	3.8491e-11	1.26871	0.168092	8.53911e-15	6.67115e-09	3.00025e-05
1	173851193	1:173851193:G:A	ENSG00000234741	GAS5	chr1:173865282:173865471:clu_29259_?:ENSG00000234741	A	G	-17689	0.192708	31	37	2.68256e-12	-1.4207	0.175045	8.53911e-15	6.67115e-09	3.00025e-05
1	173851455	1:173851455:G:A	ENSG00000234741	GAS5	chr1:173865282:173865510:clu_29259_?:ENSG00000234741	A	G	-17427	0.1875	30	36	2.73446e-12	1.35116	0.16656	8.53911e-15	6.67115e-09	3.00025e-05
1	173851455	1:173851455:G:A	ENSG00000234741	GAS5	chr1:173865282:173865471:clu_29259_?:ENSG00000234741	A	G	-17427	0.1875	30	36	1.05578e-13	-1.51631	0.172294	8.53911e-15	6.67115e-09	3.00025e-05
1	173852564	1:173852564:T:C	ENSG00000234741	GAS5	chr1:173865282:173865471:clu_29259_?:ENSG00000234741	C	T	-16318	0.375	51	72	1.64825e-05	0.590809	0.129581	8.53911e-15	6.67115e-09	3.00025e-05
1	173853083	1:173853083:A:G	ENSG00000234741	GAS5	chr1:173865282:173865471:clu_29259_?:ENSG00000234741	G	A	-15799	0.197917	29	38	2.8421e-05	0.699078	0.158284	8.53911e-15	6.67115e-09	3.00025e-05
1	173854900	1:173854900:T:G	ENSG00000234741	GAS5	chr1:173865282:173865471:clu_29259_?:ENSG00000234741	G	T	-13982	0.197917	29	38	2.8421e-05	0.699078	0.158284	8.53911e-15	6.67115e-09	3.00025e-05
1	173856554	1:173856554:T:G	ENSG00000234741	GAS5	chr1:173865282:173865471:clu_29259_?:ENSG00000234741	G	T	-12328	0.375	51	72	1.64825e-05	0.590809	0.129581	8.53911e-15	6.67115e-09	3.00025e-05
1	173861079	1:173861079:C:T	ENSG00000234741	GAS5	chr1:173865282:173865510:clu_29259_?:ENSG00000234741	T	C	-7803	0.192708	31	37	1.54434e-13	1.3801	0.15826	8.53911e-15	6.67115e-09	3.00025e-05
1	173861079	1:173861079:C:T	ENSG00000234741	GAS5	chr1:173865282:173865471:clu_29259_?:ENSG00000234741	T	C	-7803	0.192708	31	37	2.40657e-14	-1.5153	0.166286	8.53911e-15	6.67115e-09	3.00025e-05
1	173862161	1:173862161:A:C	ENSG00000234741	GAS5	chr1:173865282:173865510:clu_29259_?:ENSG00000234741	C	A	-6721	0.192708	31	37	1.54434e-13	1.3801	0.15826	8.53911e-15	6.67115e-09	3.00025e-05
1	173862161	1:173862161:A:C	ENSG00000234741	GAS5	chr1:173865282:173865471:clu_29259_?:ENSG00000234741	C	A	-6721	0.192708	31	37	2.40657e-14	-1.5153	0.166286	8.53911e-15	6.67115e-09	3.00025e-05
1	173862207	1:173862207:G:A	ENSG00000234741	GAS5	chr1:173865282:173865510:clu_29259_?:ENSG00000234741	A	G	-6675	0.192708	31	37	1.54434e-13	1.3801	0.15826	8.53911e-15	6.67115e-09	3.00025e-05
1	173862207	1:173862207:G:A	ENSG00000234741	GAS5	chr1:173865282:173865471:clu_29259_?:ENSG00000234741	A	G	-6675	0.192708	31	37	2.40657e-14	-1.5153	0.166286	8.53911e-15	6.67115e-09	3.00025e-05
1	173862569	1:173862569:A:C	ENSG00000234741	GAS5	chr1:173865282:173865471:clu_29259_?:ENSG00000234741	C	A	-6313	0.369792	50	71	7.61462e-06	0.610557	0.128329	8.53911e-15	6.67115e-09	3.00025e-05
1	173862619	1:173862619:A:T	ENSG00000234741	GAS5	chr1:173865282:173865471:clu_29259_?:ENSG00000234741	T	A	-6263	0.192708	28	37	1.1571e-05	0.727463	0.156416	8.53911e-15	6.67115e-09	3.00025e-05
1	173863509	1:173863509:A:T	ENSG00000234741	GAS5	chr1:173865282:173865471:clu_29259_?:ENSG00000234741	T	A	-5373	0.192708	31	37	2.40657e-14	-1.5153	0.166286	8.53911e-15	6.67115e-09	3.00025e-05
1	173863509	1:173863509:A:T	ENSG00000234741	GAS5	chr1:173865282:173865510:clu_29259_?:ENSG00000234741	T	A	-5373	0.192708	31	37	1.54434e-13	1.3801	0.15826	8.53911e-15	6.67115e-09	3.00025e-05
1	173863639	1:173863639:A:G	ENSG00000234741	GAS5	chr1:173865282:173865510:clu_29259_?:ENSG00000234741	G	A	-5243	0.192708	31	37	1.54434e-13	1.3801	0.15826	8.53911e-15	6.67115e-09	3.00025e-05
1	173863639	1:173863639:A:G	ENSG00000234741	GAS5	chr1:173865282:173865471:clu_29259_?:ENSG00000234741	G	A	-5243	0.192708	31	37	2.40657e-14	-1.5153	0.166286	8.53911e-15	6.67115e-09	3.00025e-05
1	173865467	1:173865467:G:A	ENSG00000234741	GAS5	chr1:173865282:173865471:clu_29259_?:ENSG00000234741	A	G	-3415	0.192708	31	37	2.40657e-14	-1.5153	0.166286	8.53911e-15	6.67115e-09	3.00025e-05
1	173865467	1:173865467:G:A	ENSG00000234741	GAS5	chr1:173865282:173865510:clu_29259_?:ENSG00000234741	A	G	-3415	0.192708	31	37	1.54434e-13	1.3801	0.15826	8.53911e-15	6.67115e-09	3.00025e-05
1	173865494	1:173865494:G:A	ENSG00000234741	GAS5	chr1:173865282:173865510:clu_29259_?:ENSG00000234741	A	G	-3388	0.192708	31	37	1.54434e-13	1.3801	0.15826	8.53911e-15	6.67115e-09	3.00025e-05
1	173865494	1:173865494:G:A	ENSG00000234741	GAS5	chr1:173865282:173865471:clu_29259_?:ENSG00000234741	A	G	-3388	0.192708	31	37	2.40657e-14	-1.5153	0.166286	8.53911e-15	6.67115e-09	3.00025e-05
1	173866073	1:173866073:C:T	ENSG00000234741	GAS5	chr1:173865282:173865471:clu_29259_?:ENSG00000234741	T	C	-2809	0.192708	28	37	1.1571e-05	0.727463	0.156416	8.53911e-15	6.67115e-09	3.00025e-05
1	173867378	1:173867378:T:C	ENSG00000234741	GAS5	chr1:173865282:173865471:clu_29259_?:ENSG00000234741	C	T	-1504	0.192708	28	37	1.1571e-05	0.727463	0.156416	8.53911e-15	6.67115e-09	3.00025e-05
1	173867464	1:173867464:G:A	ENSG00000234741	GAS5	chr1:173865282:173865471:clu_29259_?:ENSG00000234741	A	G	-1418	0.369792	50	71	7.61462e-06	0.610557	0.128329	8.53911e-15	6.67115e-09	3.00025e-05
1	173867913	1:173867913:G:A	ENSG00000234741	GAS5	chr1:173865282:173865510:clu_29259_?:ENSG00000234741	A	G	-969	0.192708	31	37	1.54434e-13	1.3801	0.15826	8.53911e-15	6.67115e-09	3.00025e-05
1	173867913	1:173867913:G:A	ENSG00000234741	GAS5	chr1:173865282:173865471:clu_29259_?:ENSG00000234741	A	G	-969	0.192708	31	37	2.40657e-14	-1.5153	0.166286	8.53911e-15	6.67115e-09	3.00025e-05
1	173868168	1:173868168:T:C	ENSG00000234741	GAS5	chr1:173865282:173865471:clu_29259_?:ENSG00000234741	C	T	-714	0.192708	28	37	1.1571e-05	0.727463	0.156416	8.53911e-15	6.67115e-09	3.00025e-05
1	173870102	1:173870102:C:T	ENSG00000234741	GAS5	chr1:173865282:173865471:clu_29259_?:ENSG00000234741	T	C	1220	0.369792	50	71	7.61462e-06	0.610557	0.128329	8.53911e-15	6.67115e-09	3.00025e-05
1	173871661	1:173871661:C:T	ENSG00000234741	GAS5	chr1:173865282:173865510:clu_29259_?:ENSG00000234741	T	C	2779	0.182292	30	35	3.43538e-09	1.12689	0.171551	8.53911e-15	6.67115e-09	3.00025e-05
1	173871661	1:173871661:C:T	ENSG00000234741	GAS5	chr1:173865282:173865471:clu_29259_?:ENSG00000234741	T	C	2779	0.182292	30	35	1.35828e-10	-1.29182	0.177544	8.53911e-15	6.67115e-09	3.00025e-05
1	173871731	1:173871731:T:C	ENSG00000234741	GAS5	chr1:173865282:173865471:clu_29259_?:ENSG00000234741	C	T	2849	0.1875	30	36	1.56566e-08	-1.09771	0.176219	8.53911e-15	6.67115e-09	3.00025e-05
1	173871731	1:173871731:T:C	ENSG00000234741	GAS5	chr1:173865282:173865510:clu_29259_?:ENSG00000234741	C	T	2849	0.1875	30	36	3.30819e-07	0.93863	0.169888	8.53911e-15	6.67115e-09	3.00025e-05
1	173872214	1:173872214:C:G	ENSG00000234741	GAS5	chr1:173865282:173865471:clu_29259_?:ENSG00000234741	G	C	3332	0.28125	41	54	1.38409e-05	0.70965	0.154116	8.53911e-15	6.67115e-09	3.00025e-05
1	173875157	1:173875157:T:C	ENSG00000234741	GAS5	chr1:173865282:173865510:clu_29259_?:ENSG00000234741	C	T	6275	0.291667	46	56	7.87217e-08	0.828789	0.14142	8.53911e-15	6.67115e-09	3.00025e-05
1	173875157	1:173875157:T:C	ENSG00000234741	GAS5	chr1:173865282:173865471:clu_29259_?:ENSG00000234741	C	T	6275	0.291667	46	56	3.13941e-10	-1.0123	0.14269	8.53911e-15	6.67115e-09	3.00025e-05
1	173875159	1:173875159:T:C	ENSG00000234741	GAS5	chr1:173865282:173865510:clu_29259_?:ENSG00000234741	C	T	6277	0.291667	46	56	7.87217e-08	0.828789	0.14142	8.53911e-15	6.67115e-09	3.00025e-05
1	173875159	1:173875159:T:C	ENSG00000234741	GAS5	chr1:173865282:173865471:clu_29259_?:ENSG00000234741	C	T	6277	0.291667	46	56	3.13941e-10	-1.0123	0.14269	8.53911e-15	6.67115e-09	3.00025e-05
1	173875335	1:173875335:T:A	ENSG00000234741	GAS5	chr1:173865282:173865510:clu_29259_?:ENSG00000234741	A	T	6453	0.28125	45	54	1.58239e-06	0.755418	0.146714	8.53911e-15	6.67115e-09	3.00025e-05
1	173875335	1:173875335:T:A	ENSG00000234741	GAS5	chr1:173865282:173865471:clu_29259_?:ENSG00000234741	A	T	6453	0.28125	45	54	7.29855e-09	-0.949374	0.14832	8.53911e-15	6.67115e-09	3.00025e-05
1	173876094	1:173876094:T:C	ENSG00000234741	GAS5	chr1:173865282:173865510:clu_29259_?:ENSG00000234741	C	T	7212	0.197917	32	38	7.75306e-12	1.22814	0.155649	8.53911e-15	6.67115e-09	3.00025e-05
1	173876094	1:173876094:T:C	ENSG00000234741	GAS5	chr1:173865282:173865471:clu_29259_?:ENSG00000234741	C	T	7212	0.197917	32	38	1.73158e-13	-1.39163	0.160026	8.53911e-15	6.67115e-09	3.00025e-05
1	173877392	1:173877392:T:C	ENSG00000234741	GAS5	chr1:173865282:173865471:clu_29259_?:ENSG00000234741	C	T	8510	0.28125	40	54	7.87789e-06	0.721334	0.151888	8.53911e-15	6.67115e-09	3.00025e-05
1	173877882	1:173877882:G:T	ENSG00000234741	GAS5	chr1:173865282:173865510:clu_29259_?:ENSG00000234741	T	G	9000	0.291667	46	56	7.87217e-08	0.828789	0.14142	8.53911e-15	6.67115e-09	3.00025e-05
1	173877882	1:173877882:G:T	ENSG00000234741	GAS5	chr1:173865282:173865471:clu_29259_?:ENSG00000234741	T	G	9000	0.291667	46	56	3.13941e-10	-1.0123	0.14269	8.53911e-15	6.67115e-09	3.00025e-05
1	173878631	1:173878631:C:T	ENSG00000234741	GAS5	chr1:173865282:173865471:clu_29259_?:ENSG00000234741	T	C	9749	0.28125	40	54	7.87789e-06	0.721334	0.151888	8.53911e-15	6.67115e-09	3.00025e-05
1	173879670	1:173879670:G:A	ENSG00000234741	GAS5	chr1:173865282:173865471:clu_29259_?:ENSG00000234741	A	G	10788	0.375	56	72	1.87974e-05	-0.623027	0.13768	8.53911e-15	6.67115e-09	3.00025e-05
1	173879968	1:173879968:G:C	ENSG00000234741	GAS5	chr1:173865282:173865471:clu_29259_?:ENSG00000234741	C	G	11086	0.28125	40	54	7.87789e-06	0.721334	0.151888	8.53911e-15	6.67115e-09	3.00025e-05
1	173880858	1:173880858:T:C	ENSG00000234741	GAS5	chr1:173865282:173865471:clu_29259_?:ENSG00000234741	C	T	11976	0.130208	21	25	7.81329e-06	0.906929	0.190883	8.53911e-15	6.67115e-09	3.00025e-05
1	173881640	1:173881640:C:T	ENSG00000234741	GAS5	chr1:173865282:173865471:clu_29259_?:ENSG00000234741	T	C	12758	0.28125	40	54	7.87789e-06	0.721334	0.151888	8.53911e-15	6.67115e-09	3.00025e-05
1	173882300	1:173882300:G:A	ENSG00000234741	GAS5	chr1:173865282:173865471:clu_29259_?:ENSG00000234741	A	G	13418	0.171875	28	33	1.21896e-05	0.796671	0.171791	8.53911e-15	6.67115e-09	3.00025e-05
1	173882589	1:173882589:C:A	ENSG00000234741	GAS5	chr1:173865282:173865471:clu_29259_?:ENSG00000234741	A	C	13707	0.104167	16	20	1.51697e-06	1.06071	0.205595	8.53911e-15	6.67115e-09	3.00025e-05
1	173884136	1:173884136:C:T	ENSG00000234741	GAS5	chr1:173865282:173865471:clu_29259_?:ENSG00000234741	T	C	15254	0.145833	23	28	4.82603e-06	0.859343	0.176351	8.53911e-15	6.67115e-09	3.00025e-05
1	173885521	1:173885521:C:T	ENSG00000234741	GAS5	chr1:173865282:173865471:clu_29259_?:ENSG00000234741	T	C	16639	0.28125	40	54	7.87789e-06	0.721334	0.151888	8.53911e-15	6.67115e-09	3.00025e-05
1	173887099	1:173887099:G:A	ENSG00000234741	GAS5	chr1:173865282:173865471:clu_29259_?:ENSG00000234741	A	G	18217	0.197917	32	38	1.73158e-13	-1.39163	0.160026	8.53911e-15	6.67115e-09	3.00025e-05
1	173887099	1:173887099:G:A	ENSG00000234741	GAS5	chr1:173865282:173865510:clu_29259_?:ENSG00000234741	A	G	18217	0.197917	32	38	7.75306e-12	1.22814	0.155649	8.53911e-15	6.67115e-09	3.00025e-05
1	173888854	1:173888854:G:C	ENSG00000234741	GAS5	chr1:173865282:173865471:clu_29259_?:ENSG00000234741	C	G	19972	0.130208	21	25	7.81329e-06	0.906929	0.190883	8.53911e-15	6.67115e-09	3.00025e-05
1	173889386	1:173889386:C:T	ENSG00000234741	GAS5	chr1:173865282:173865471:clu_29259_?:ENSG00000234741	T	C	20504	0.28125	40	54	7.87789e-06	0.721334	0.151888	8.53911e-15	6.67115e-09	3.00025e-05
1	173889940	1:173889940:T:C	ENSG00000234741	GAS5	chr1:173865282:173865471:clu_29259_?:ENSG00000234741	C	T	21058	0.104167	16	20	1.51697e-06	1.06071	0.205595	8.53911e-15	6.67115e-09	3.00025e-05
1	173890049	1:173890049:A:G	ENSG00000234741	GAS5	chr1:173865282:173865471:clu_29259_?:ENSG00000234741	G	A	21167	0.130208	21	25	7.81329e-06	0.906929	0.190883	8.53911e-15	6.67115e-09	3.00025e-05
1	173891044	1:173891044:T:C	ENSG00000234741	GAS5	chr1:173865282:173865471:clu_29259_?:ENSG00000234741	C	T	22162	0.291667	46	56	3.13941e-10	-1.0123	0.14269	8.53911e-15	6.67115e-09	3.00025e-05
1	173891044	1:173891044:T:C	ENSG00000234741	GAS5	chr1:173865282:173865510:clu_29259_?:ENSG00000234741	C	T	22162	0.291667	46	56	7.87217e-08	0.828789	0.14142	8.53911e-15	6.67115e-09	3.00025e-05
1	173893488	1:173893488:C:T	ENSG00000234741	GAS5	chr1:173865282:173865471:clu_29259_?:ENSG00000234741	T	C	24606	0.28125	40	54	7.87789e-06	0.721334	0.151888	8.53911e-15	6.67115e-09	3.00025e-05
1	173893527	1:173893527:T:C	ENSG00000234741	GAS5	chr1:173865282:173865471:clu_29259_?:ENSG00000234741	C	T	24645	0.104167	16	20	1.51697e-06	1.06071	0.205595	8.53911e-15	6.67115e-09	3.00025e-05
1	173894361	1:173894361:C:T	ENSG00000234741	GAS5	chr1:173865282:173865471:clu_29259_?:ENSG00000234741	T	C	25479	0.28125	40	54	7.87789e-06	0.721334	0.151888	8.53911e-15	6.67115e-09	3.00025e-05
1	173894831	1:173894831:C:G	ENSG00000234741	GAS5	chr1:173865282:173865471:clu_29259_?:ENSG00000234741	G	C	25949	0.140625	23	27	2.77491e-06	0.925406	0.184682	8.53911e-15	6.67115e-09	3.00025e-05
1	173895742	1:173895742:C:T	ENSG00000234741	GAS5	chr1:173865282:173865471:clu_29259_?:ENSG00000234741	T	C	26860	0.28125	40	54	7.87789e-06	0.721334	0.151888	8.53911e-15	6.67115e-09	3.00025e-05
1	173896268	1:173896268:A:G	ENSG00000234741	GAS5	chr1:173865282:173865471:clu_29259_?:ENSG00000234741	G	A	27386	0.28125	40	54	7.87789e-06	0.721334	0.151888	8.53911e-15	6.67115e-09	3.00025e-05
1	173896523	1:173896523:T:C	ENSG00000234741	GAS5	chr1:173865282:173865471:clu_29259_?:ENSG00000234741	C	T	27641	0.28125	40	54	7.87789e-06	0.721334	0.151888	8.53911e-15	6.67115e-09	3.00025e-05
1	173897958	1:173897958:G:C	ENSG00000234741	GAS5	chr1:173865282:173865471:clu_29259_?:ENSG00000234741	C	G	29076	0.28125	40	54	7.87789e-06	0.721334	0.151888	8.53911e-15	6.67115e-09	3.00025e-05
1	173898583	1:173898583:T:C	ENSG00000234741	GAS5	chr1:173865282:173865471:clu_29259_?:ENSG00000234741	C	T	29701	0.130208	21	25	7.81329e-06	0.906929	0.190883	8.53911e-15	6.67115e-09	3.00025e-05
1	173899817	1:173899817:C:T	ENSG00000234741	GAS5	chr1:173865282:173865471:clu_29259_?:ENSG00000234741	T	C	30935	0.375	56	72	1.87974e-05	-0.623027	0.13768	8.53911e-15	6.67115e-09	3.00025e-05
1	173899973	1:173899973:C:G	ENSG00000234741	GAS5	chr1:173865282:173865510:clu_29259_?:ENSG00000234741	G	C	31091	0.291667	46	56	7.87217e-08	0.828789	0.14142	8.53911e-15	6.67115e-09	3.00025e-05
1	173899973	1:173899973:C:G	ENSG00000234741	GAS5	chr1:173865282:173865471:clu_29259_?:ENSG00000234741	G	C	31091	0.291667	46	56	3.13941e-10	-1.0123	0.14269	8.53911e-15	6.67115e-09	3.00025e-05
1	173900431	1:173900431:G:C	ENSG00000234741	GAS5	chr1:173865282:173865510:clu_29259_?:ENSG00000234741	C	G	31549	0.192708	31	37	1.20062e-10	1.15149	0.157679	8.53911e-15	6.67115e-09	3.00025e-05
1	173900431	1:173900431:G:C	ENSG00000234741	GAS5	chr1:173865282:173865471:clu_29259_?:ENSG00000234741	C	G	31549	0.192708	31	37	2.66378e-12	-1.31601	0.162115	8.53911e-15	6.67115e-09	3.00025e-05
1	173900492	1:173900492:A:G	ENSG00000234741	GAS5	chr1:173865282:173865471:clu_29259_?:ENSG00000234741	G	A	31610	0.28125	40	54	7.87789e-06	0.721334	0.151888	8.53911e-15	6.67115e-09	3.00025e-05
1	173901226	1:173901226:G:A	ENSG00000234741	GAS5	chr1:173865282:173865471:clu_29259_?:ENSG00000234741	A	G	32344	0.28125	40	54	7.87789e-06	0.721334	0.151888	8.53911e-15	6.67115e-09	3.00025e-05
1	173901763	1:173901763:A:G	ENSG00000234741	GAS5	chr1:173865282:173865471:clu_29259_?:ENSG00000234741	G	A	32881	0.140625	23	27	2.77491e-06	0.925406	0.184682	8.53911e-15	6.67115e-09	3.00025e-05
1	173906263	1:173906263:T:G	ENSG00000234741	GAS5	chr1:173865282:173865471:clu_29259_?:ENSG00000234741	G	T	37381	0.130208	21	25	7.81329e-06	0.906929	0.190883	8.53911e-15	6.67115e-09	3.00025e-05
1	173907423	1:173907423:C:G	ENSG00000234741	GAS5	chr1:173865282:173865471:clu_29259_?:ENSG00000234741	G	C	38541	0.104167	16	20	1.51697e-06	1.06071	0.205595	8.53911e-15	6.67115e-09	3.00025e-05
1	173907567	1:173907567:C:T	ENSG00000234741	GAS5	chr1:173865282:173865510:clu_29259_?:ENSG00000234741	T	C	38685	0.197917	32	38	7.75306e-12	1.22814	0.155649	8.53911e-15	6.67115e-09	3.00025e-05
1	173907567	1:173907567:C:T	ENSG00000234741	GAS5	chr1:173865282:173865471:clu_29259_?:ENSG00000234741	T	C	38685	0.197917	32	38	1.73158e-13	-1.39163	0.160026	8.53911e-15	6.67115e-09	3.00025e-05
1	173908748	1:173908748:G:C	ENSG00000234741	GAS5	chr1:173865282:173865471:clu_29259_?:ENSG00000234741	C	G	39866	0.130208	21	25	7.81329e-06	0.906929	0.190883	8.53911e-15	6.67115e-09	3.00025e-05
1	173912755	1:173912755:C:T	ENSG00000234741	GAS5	chr1:173865282:173865510:clu_29259_?:ENSG00000234741	T	C	43873	0.197917	32	38	7.75306e-12	1.22814	0.155649	8.53911e-15	6.67115e-09	3.00025e-05
1	173912755	1:173912755:C:T	ENSG00000234741	GAS5	chr1:173865282:173865471:clu_29259_?:ENSG00000234741	T	C	43873	0.197917	32	38	1.73158e-13	-1.39163	0.160026	8.53911e-15	6.67115e-09	3.00025e-05
1	173913842	1:173913842:G:A	ENSG00000234741	GAS5	chr1:173865282:173865471:clu_29259_?:ENSG00000234741	A	G	44960	0.213542	36	41	1.61835e-06	0.884018	0.171874	8.53911e-15	6.67115e-09	3.00025e-05
1	173915601	1:173915601:C:G	ENSG00000234741	GAS5	chr1:173865282:173865471:clu_29259_?:ENSG00000234741	G	C	46719	0.255208	38	49	9.51173e-06	0.725546	0.154336	8.53911e-15	6.67115e-09	3.00025e-05
1	173915655	1:173915655:T:C	ENSG00000234741	GAS5	chr1:173865282:173865471:clu_29259_?:ENSG00000234741	C	T	46773	0.401042	48	77	8.09863e-07	0.836499	0.157493	8.53911e-15	6.67115e-09	3.00025e-05
1	173916137	1:173916137:A:T	ENSG00000234741	GAS5	chr1:173865282:173865471:clu_29259_?:ENSG00000234741	T	A	47255	0.119792	19	23	1.50366e-06	0.992718	0.192336	8.53911e-15	6.67115e-09	3.00025e-05
1	173916343	1:173916343:C:T	ENSG00000234741	GAS5	chr1:173865282:173865471:clu_29259_?:ENSG00000234741	T	C	47461	0.255208	38	49	9.51173e-06	0.725546	0.154336	8.53911e-15	6.67115e-09	3.00025e-05
1	173916398	1:173916398:G:T	ENSG00000234741	GAS5	chr1:173865282:173865471:clu_29259_?:ENSG00000234741	T	G	47516	0.255208	38	49	9.51173e-06	0.725546	0.154336	8.53911e-15	6.67115e-09	3.00025e-05
1	173916574	1:173916574:C:T	ENSG00000234741	GAS5	chr1:173865282:173865510:clu_29259_?:ENSG00000234741	T	C	47692	0.192708	31	37	1.6699e-13	1.31715	0.151329	8.53911e-15	6.67115e-09	3.00025e-05
1	173916574	1:173916574:C:T	ENSG00000234741	GAS5	chr1:173865282:173865471:clu_29259_?:ENSG00000234741	T	C	47692	0.192708	31	37	8.53911e-15	-1.46521	0.157024	8.53911e-15	6.67115e-09	3.00025e-05
1	173916899	1:173916899:G:A	ENSG00000234741	GAS5	chr1:173865282:173865471:clu_29259_?:ENSG00000234741	A	G	48017	0.260417	39	50	1.49114e-05	0.71979	0.156975	8.53911e-15	6.67115e-09	3.00025e-05
1	173917078	1:173917078:C:T	ENSG00000234741	GAS5	chr1:173865282:173865471:clu_29259_?:ENSG00000234741	T	C	48196	0.192708	31	37	8.53911e-15	-1.46521	0.157024	8.53911e-15	6.67115e-09	3.00025e-05
1	173917078	1:173917078:C:T	ENSG00000234741	GAS5	chr1:173865282:173865510:clu_29259_?:ENSG00000234741	T	C	48196	0.192708	31	37	1.6699e-13	1.31715	0.151329	8.53911e-15	6.67115e-09	3.00025e-05
1	173918305	1:173918305:T:C	ENSG00000234741	GAS5	chr1:173865282:173865471:clu_29259_?:ENSG00000234741	C	T	49423	0.114583	18	22	1.11162e-05	0.916018	0.196522	8.53911e-15	6.67115e-09	3.00025e-05
1	173918759	1:173918759:G:A	ENSG00000234741	GAS5	chr1:173865282:173865471:clu_29259_?:ENSG00000234741	A	G	49877	0.114583	18	22	1.11162e-05	0.916018	0.196522	8.53911e-15	6.67115e-09	3.00025e-05
1	173921547	1:173921547:C:A	ENSG00000234741	GAS5	chr1:173865282:173865471:clu_29259_?:ENSG00000234741	A	C	52665	0.385417	47	74	1.73115e-06	0.783591	0.152838	8.53911e-15	6.67115e-09	3.00025e-05
1	173922093	1:173922093:T:A	ENSG00000234741	GAS5	chr1:173865282:173865510:clu_29259_?:ENSG00000234741	A	T	53211	0.192708	31	37	1.6699e-13	1.31715	0.151329	8.53911e-15	6.67115e-09	3.00025e-05
1	173922093	1:173922093:T:A	ENSG00000234741	GAS5	chr1:173865282:173865471:clu_29259_?:ENSG00000234741	A	T	53211	0.192708	31	37	8.53911e-15	-1.46521	0.157024	8.53911e-15	6.67115e-09	3.00025e-05
1	173922557	1:173922557:T:C	ENSG00000234741	GAS5	chr1:173865282:173865471:clu_29259_?:ENSG00000234741	C	T	53675	0.234375	37	45	1.96682e-06	0.815571	0.160052	8.53911e-15	6.67115e-09	3.00025e-05
1	173922936	1:173922936:T:C	ENSG00000234741	GAS5	chr1:173865282:173865471:clu_29259_?:ENSG00000234741	C	T	54054	0.385417	46	74	1.83347e-06	0.864229	0.16903	8.53911e-15	6.67115e-09	3.00025e-05
1	173922963	1:173922963:G:A	ENSG00000234741	GAS5	chr1:173865282:173865471:clu_29259_?:ENSG00000234741	A	G	54081	0.3125	46	60	1.08019e-07	-0.785624	0.135751	8.53911e-15	6.67115e-09	3.00025e-05
1	173923522	1:173923522:A:C	ENSG00000234741	GAS5	chr1:173865282:173865471:clu_29259_?:ENSG00000234741	C	A	54640	0.401042	47	77	2.46634e-06	0.862353	0.171104	8.53911e-15	6.67115e-09	3.00025e-05
1	173923538	1:173923538:A:C	ENSG00000234741	GAS5	chr1:173865282:173865510:clu_29259_?:ENSG00000234741	C	A	54656	0.208333	33	40	1.01177e-09	1.1136	0.162838	8.53911e-15	6.67115e-09	3.00025e-05
1	173923538	1:173923538:A:C	ENSG00000234741	GAS5	chr1:173865282:173865471:clu_29259_?:ENSG00000234741	C	A	54656	0.208333	33	40	7.61186e-10	-1.20184	0.174152	8.53911e-15	6.67115e-09	3.00025e-05
1	173923880	1:173923880:G:A	ENSG00000234741	GAS5	chr1:173865282:173865471:clu_29259_?:ENSG00000234741	A	G	54998	0.375	46	72	2.12444e-05	0.73589	0.163779	8.53911e-15	6.67115e-09	3.00025e-05
1	173924849	1:173924849:C:T	ENSG00000234741	GAS5	chr1:173865282:173865510:clu_29259_?:ENSG00000234741	T	C	55967	0.234375	38	45	4.1095e-06	0.798767	0.162577	8.53911e-15	6.67115e-09	3.00025e-05
1	173924849	1:173924849:C:T	ENSG00000234741	GAS5	chr1:173865282:173865471:clu_29259_?:ENSG00000234741	T	C	55967	0.234375	38	45	2.43851e-08	-1.01027	0.164837	8.53911e-15	6.67115e-09	3.00025e-05
1	173924850	1:173924850:G:A	ENSG00000234741	GAS5	chr1:173865282:173865471:clu_29259_?:ENSG00000234741	G	A	55968	0.75	41	48	3.26771e-07	0.904615	0.163645	8.53911e-15	6.67115e-09	3.00025e-05
1	173924851	1:173924851:T:C	ENSG00000234741	GAS5	chr1:173865282:173865510:clu_29259_?:ENSG00000234741	C	T	55969	0.234375	38	45	4.1095e-06	0.798767	0.162577	8.53911e-15	6.67115e-09	3.00025e-05
1	173924851	1:173924851:T:C	ENSG00000234741	GAS5	chr1:173865282:173865471:clu_29259_?:ENSG00000234741	C	T	55969	0.234375	38	45	2.43851e-08	-1.01027	0.164837	8.53911e-15	6.67115e-09	3.00025e-05
1	173924854	1:173924854:T:G	ENSG00000234741	GAS5	chr1:173865282:173865510:clu_29259_?:ENSG00000234741	T	G	55972	0.760417	39	46	1.10597e-06	-0.848582	0.162065	8.53911e-15	6.67115e-09	3.00025e-05
1	173924854	1:173924854:T:G	ENSG00000234741	GAS5	chr1:173865282:173865471:clu_29259_?:ENSG00000234741	T	G	55972	0.760417	39	46	9.41824e-09	1.0464	0.164951	8.53911e-15	6.67115e-09	3.00025e-05
1	173929079	1:173929079:C:G	ENSG00000234741	GAS5	chr1:173865282:173865510:clu_29259_?:ENSG00000234741	G	C	60197	0.203125	31	39	5.40221e-06	0.87547	0.180712	8.53911e-15	6.67115e-09	3.00025e-05
1	173948841	1:173948841:C:A	ENSG00000234741	GAS5	chr1:173865282:173865471:clu_29259_?:ENSG00000234741	A	C	79959	0.197917	30	38	2.30485e-05	-0.897753	0.200758	8.53911e-15	6.67115e-09	3.00025e-05
1	173948841	1:173948841:C:A	ENSG00000234741	GAS5	chr1:173865282:173865510:clu_29259_?:ENSG00000234741	A	C	79959	0.197917	30	38	7.23069e-07	0.96182	0.180163	8.53911e-15	6.67115e-09	3.00025e-05
1	173955043	1:173955043:G:A	ENSG00000234741	GAS5	chr1:173865282:173865510:clu_29259_?:ENSG00000234741	A	G	86161	0.203125	31	39	5.40221e-06	0.87547	0.180712	8.53911e-15	6.67115e-09	3.00025e-05
1	173964763	1:173964763:C:T	ENSG00000234741	GAS5	chr1:173865282:173865510:clu_29259_?:ENSG00000234741	T	C	95881	0.197917	30	38	7.23069e-07	0.96182	0.180163	8.53911e-15	6.67115e-09	3.00025e-05
1	173964763	1:173964763:C:T	ENSG00000234741	GAS5	chr1:173865282:173865471:clu_29259_?:ENSG00000234741	T	C	95881	0.197917	30	38	2.30485e-05	-0.897753	0.200758	8.53911e-15	6.67115e-09	3.00025e-05
1	173967246	1:173967246:G:A	ENSG00000234741	GAS5	chr1:173865282:173865510:clu_29259_?:ENSG00000234741	A	G	98364	0.197917	30	38	7.23069e-07	0.96182	0.180163	8.53911e-15	6.67115e-09	3.00025e-05
1	173967246	1:173967246:G:A	ENSG00000234741	GAS5	chr1:173865282:173865471:clu_29259_?:ENSG00000234741	A	G	98364	0.197917	30	38	2.30485e-05	-0.897753	0.200758	8.53911e-15	6.67115e-09	3.00025e-05
1	174079508	1:174079508:C:T	ENSG00000227373	AL121983.2	chr1:174155697:174158887:clu_29280_?:ENSG00000227373	T	C	-80657	0.463542	64	89	2.52281e-05	-0.715991	0.160967	1.36398e-19	1.24995e-12	3.3146e-05
1	174080447	1:174080447:C:G	ENSG00000227373	AL121983.2	chr1:174155697:174158887:clu_29280_?:ENSG00000227373	G	C	-79718	0.463542	64	89	2.52281e-05	-0.715991	0.160967	1.36398e-19	1.24995e-12	3.3146e-05
1	174081285	1:174081285:A:G	ENSG00000227373	AL121983.2	chr1:174155697:174158887:clu_29280_?:ENSG00000227373	G	A	-78880	0.463542	64	89	2.52281e-05	-0.715991	0.160967	1.36398e-19	1.24995e-12	3.3146e-05
1	174083146	1:174083146:G:A	ENSG00000227373	AL121983.2	chr1:174155697:174158887:clu_29280_?:ENSG00000227373	A	G	-77019	0.458333	64	88	1.99554e-05	-0.725955	0.160981	1.36398e-19	1.24995e-12	3.3146e-05
1	174085103	1:174085103:C:T	ENSG00000227373	AL121983.2	chr1:174155697:174158887:clu_29280_?:ENSG00000227373	T	C	-75062	0.458333	64	88	1.99554e-05	-0.725955	0.160981	1.36398e-19	1.24995e-12	3.3146e-05
1	174089454	1:174089454:A:G	ENSG00000227373	AL121983.2	chr1:174155697:174158887:clu_29280_?:ENSG00000227373	G	A	-70711	0.114583	16	22	1.05363e-11	1.17221	0.149803	1.36398e-19	1.24995e-12	3.3146e-05
1	174090876	1:174090876:A:G	ENSG00000227373	AL121983.2	chr1:174155697:174158887:clu_29280_?:ENSG00000227373	G	A	-69289	0.229167	35	44	9.29477e-19	1.25914	0.111724	1.36398e-19	1.24995e-12	3.3146e-05
1	174090876	1:174090876:A:G	ENSG00000227373	AL121983.2	chr1:174155697:174159917:clu_29280_?:ENSG00000227373	G	A	-69289	0.229167	35	44	1.41616e-06	-0.862899	0.166712	1.36398e-19	1.24995e-12	3.3146e-05
1	174093234	1:174093234:C:T	ENSG00000227373	AL121983.2	chr1:174155697:174158887:clu_29280_?:ENSG00000227373	T	C	-66931	0.229167	35	44	9.29477e-19	1.25914	0.111724	1.36398e-19	1.24995e-12	3.3146e-05
1	174093234	1:174093234:C:T	ENSG00000227373	AL121983.2	chr1:174155697:174159917:clu_29280_?:ENSG00000227373	T	C	-66931	0.229167	35	44	1.41616e-06	-0.862899	0.166712	1.36398e-19	1.24995e-12	3.3146e-05
1	174093863	1:174093863:G:A	ENSG00000227373	AL121983.2	chr1:174155697:174158887:clu_29280_?:ENSG00000227373	A	G	-66302	0.114583	16	22	1.05363e-11	1.17221	0.149803	1.36398e-19	1.24995e-12	3.3146e-05
1	174095077	1:174095077:C:T	ENSG00000227373	AL121983.2	chr1:174155697:174158887:clu_29280_?:ENSG00000227373	T	C	-65088	0.229167	35	44	9.29477e-19	1.25914	0.111724	1.36398e-19	1.24995e-12	3.3146e-05
1	174095077	1:174095077:C:T	ENSG00000227373	AL121983.2	chr1:174155697:174159917:clu_29280_?:ENSG00000227373	T	C	-65088	0.229167	35	44	1.41616e-06	-0.862899	0.166712	1.36398e-19	1.24995e-12	3.3146e-05
1	174096823	1:174096823:C:T	ENSG00000227373	AL121983.2	chr1:174155697:174159917:clu_29280_?:ENSG00000227373	T	C	-63342	0.270833	37	52	1.94839e-05	-0.727443	0.161088	1.36398e-19	1.24995e-12	3.3146e-05
1	174096823	1:174096823:C:T	ENSG00000227373	AL121983.2	chr1:174155697:174158887:clu_29280_?:ENSG00000227373	T	C	-63342	0.270833	37	52	1.37385e-16	1.1324	0.110979	1.36398e-19	1.24995e-12	3.3146e-05
1	174097622	1:174097622:T:A	ENSG00000227373	AL121983.2	chr1:174155697:174158887:clu_29280_?:ENSG00000227373	T	A	-62543	0.53125	68	90	1.7352e-06	-0.681089	0.13286	1.36398e-19	1.24995e-12	3.3146e-05
1	174099231	1:174099231:C:T	ENSG00000227373	AL121983.2	chr1:174155697:174158887:clu_29280_?:ENSG00000227373	T	C	-60934	0.229167	35	44	9.29477e-19	1.25914	0.111724	1.36398e-19	1.24995e-12	3.3146e-05
1	174099231	1:174099231:C:T	ENSG00000227373	AL121983.2	chr1:174155697:174159917:clu_29280_?:ENSG00000227373	T	C	-60934	0.229167	35	44	1.41616e-06	-0.862899	0.166712	1.36398e-19	1.24995e-12	3.3146e-05
1	174099675	1:174099675:T:A	ENSG00000227373	AL121983.2	chr1:174155697:174158887:clu_29280_?:ENSG00000227373	A	T	-60490	0.114583	16	22	1.05363e-11	1.17221	0.149803	1.36398e-19	1.24995e-12	3.3146e-05
1	174102505	1:174102505:G:A	ENSG00000227373	AL121983.2	chr1:174155697:174158887:clu_29280_?:ENSG00000227373	A	G	-57660	0.0989583	15	19	7.71413e-09	1.13074	0.176997	1.36398e-19	1.24995e-12	3.3146e-05
1	174106480	1:174106480:A:T	ENSG00000227373	AL121983.2	chr1:174155697:174158887:clu_29280_?:ENSG00000227373	T	A	-53685	0.114583	16	22	1.05363e-11	1.17221	0.149803	1.36398e-19	1.24995e-12	3.3146e-05
1	174107185	1:174107185:G:C	ENSG00000227373	AL121983.2	chr1:174155697:174158887:clu_29280_?:ENSG00000227373	C	G	-52980	0.114583	16	22	1.05363e-11	1.17221	0.149803	1.36398e-19	1.24995e-12	3.3146e-05
1	174107439	1:174107439:T:G	ENSG00000227373	AL121983.2	chr1:174155697:174158887:clu_29280_?:ENSG00000227373	G	T	-52726	0.114583	16	22	1.05363e-11	1.17221	0.149803	1.36398e-19	1.24995e-12	3.3146e-05
1	174110315	1:174110315:T:C	ENSG00000227373	AL121983.2	chr1:174155697:174158887:clu_29280_?:ENSG00000227373	C	T	-49850	0.0833333	12	16	1.39568e-06	1.03783	0.200371	1.36398e-19	1.24995e-12	3.3146e-05
1	174111759	1:174111759:T:G	ENSG00000227373	AL121983.2	chr1:174155697:174159917:clu_29280_?:ENSG00000227373	G	T	-48406	0.229167	35	44	1.41616e-06	-0.862899	0.166712	1.36398e-19	1.24995e-12	3.3146e-05
1	174111759	1:174111759:T:G	ENSG00000227373	AL121983.2	chr1:174155697:174158887:clu_29280_?:ENSG00000227373	G	T	-48406	0.229167	35	44	9.29477e-19	1.25914	0.111724	1.36398e-19	1.24995e-12	3.3146e-05
1	174114330	1:174114330:G:T	ENSG00000227373	AL121983.2	chr1:174155697:174158887:clu_29280_?:ENSG00000227373	T	G	-45835	0.114583	16	22	1.05363e-11	1.17221	0.149803	1.36398e-19	1.24995e-12	3.3146e-05
1	174115504	1:174115504:C:A	ENSG00000227373	AL121983.2	chr1:174155697:174158887:clu_29280_?:ENSG00000227373	A	C	-44661	0.114583	16	22	1.05363e-11	1.17221	0.149803	1.36398e-19	1.24995e-12	3.3146e-05
1	174118986	1:174118986:C:T	ENSG00000227373	AL121983.2	chr1:174155697:174158887:clu_29280_?:ENSG00000227373	T	C	-41179	0.229167	35	44	9.29477e-19	1.25914	0.111724	1.36398e-19	1.24995e-12	3.3146e-05
1	174118986	1:174118986:C:T	ENSG00000227373	AL121983.2	chr1:174155697:174159917:clu_29280_?:ENSG00000227373	T	C	-41179	0.229167	35	44	1.41616e-06	-0.862899	0.166712	1.36398e-19	1.24995e-12	3.3146e-05
1	174119548	1:174119548:T:C	ENSG00000227373	AL121983.2	chr1:174155697:174158887:clu_29280_?:ENSG00000227373	C	T	-40617	0.114583	16	22	1.05363e-11	1.17221	0.149803	1.36398e-19	1.24995e-12	3.3146e-05
1	174120020	1:174120020:T:C	ENSG00000227373	AL121983.2	chr1:174155697:174158887:clu_29280_?:ENSG00000227373	C	T	-40145	0.229167	35	44	9.29477e-19	1.25914	0.111724	1.36398e-19	1.24995e-12	3.3146e-05
1	174120020	1:174120020:T:C	ENSG00000227373	AL121983.2	chr1:174155697:174159917:clu_29280_?:ENSG00000227373	C	T	-40145	0.229167	35	44	1.41616e-06	-0.862899	0.166712	1.36398e-19	1.24995e-12	3.3146e-05
1	174120909	1:174120909:C:T	ENSG00000227373	AL121983.2	chr1:174155697:174159917:clu_29280_?:ENSG00000227373	T	C	-39256	0.229167	35	44	1.41616e-06	-0.862899	0.166712	1.36398e-19	1.24995e-12	3.3146e-05
1	174120909	1:174120909:C:T	ENSG00000227373	AL121983.2	chr1:174155697:174158887:clu_29280_?:ENSG00000227373	T	C	-39256	0.229167	35	44	9.29477e-19	1.25914	0.111724	1.36398e-19	1.24995e-12	3.3146e-05
1	174125295	1:174125295:G:A	ENSG00000227373	AL121983.2	chr1:174155697:174158887:clu_29280_?:ENSG00000227373	A	G	-34870	0.229167	35	44	9.29477e-19	1.25914	0.111724	1.36398e-19	1.24995e-12	3.3146e-05
1	174125295	1:174125295:G:A	ENSG00000227373	AL121983.2	chr1:174155697:174159917:clu_29280_?:ENSG00000227373	A	G	-34870	0.229167	35	44	1.41616e-06	-0.862899	0.166712	1.36398e-19	1.24995e-12	3.3146e-05
1	174126132	1:174126132:A:G	ENSG00000227373	AL121983.2	chr1:174155697:174159917:clu_29280_?:ENSG00000227373	G	A	-34033	0.229167	35	44	1.41616e-06	-0.862899	0.166712	1.36398e-19	1.24995e-12	3.3146e-05
1	174126132	1:174126132:A:G	ENSG00000227373	AL121983.2	chr1:174155697:174158887:clu_29280_?:ENSG00000227373	G	A	-34033	0.229167	35	44	9.29477e-19	1.25914	0.111724	1.36398e-19	1.24995e-12	3.3146e-05
1	174126707	1:174126707:T:G	ENSG00000227373	AL121983.2	chr1:174155697:174158887:clu_29280_?:ENSG00000227373	G	T	-33458	0.114583	16	22	1.05363e-11	1.17221	0.149803	1.36398e-19	1.24995e-12	3.3146e-05
1	174127193	1:174127193:T:C	ENSG00000227373	AL121983.2	chr1:174155697:174158887:clu_29280_?:ENSG00000227373	C	T	-32972	0.114583	16	22	1.05363e-11	1.17221	0.149803	1.36398e-19	1.24995e-12	3.3146e-05
1	174127216	1:174127216:C:T	ENSG00000227373	AL121983.2	chr1:174155697:174158887:clu_29280_?:ENSG00000227373	T	C	-32949	0.114583	16	22	1.05363e-11	1.17221	0.149803	1.36398e-19	1.24995e-12	3.3146e-05
1	174127524	1:174127524:G:A	ENSG00000227373	AL121983.2	chr1:174155697:174158887:clu_29280_?:ENSG00000227373	A	G	-32641	0.114583	16	22	1.05363e-11	1.17221	0.149803	1.36398e-19	1.24995e-12	3.3146e-05
1	174127631	1:174127631:A:G	ENSG00000227373	AL121983.2	chr1:174155697:174158887:clu_29280_?:ENSG00000227373	G	A	-32534	0.229167	35	44	9.29477e-19	1.25914	0.111724	1.36398e-19	1.24995e-12	3.3146e-05
1	174127631	1:174127631:A:G	ENSG00000227373	AL121983.2	chr1:174155697:174159917:clu_29280_?:ENSG00000227373	G	A	-32534	0.229167	35	44	1.41616e-06	-0.862899	0.166712	1.36398e-19	1.24995e-12	3.3146e-05
1	174132729	1:174132729:C:T	ENSG00000227373	AL121983.2	chr1:174155697:174159917:clu_29280_?:ENSG00000227373	T	C	-27436	0.229167	35	44	1.41616e-06	-0.862899	0.166712	1.36398e-19	1.24995e-12	3.3146e-05
1	174132729	1:174132729:C:T	ENSG00000227373	AL121983.2	chr1:174155697:174158887:clu_29280_?:ENSG00000227373	T	C	-27436	0.229167	35	44	9.29477e-19	1.25914	0.111724	1.36398e-19	1.24995e-12	3.3146e-05
1	174134264	1:174134264:G:A	ENSG00000227373	AL121983.2	chr1:174155697:174159917:clu_29280_?:ENSG00000227373	A	G	-25901	0.229167	35	44	1.41616e-06	-0.862899	0.166712	1.36398e-19	1.24995e-12	3.3146e-05
1	174134264	1:174134264:G:A	ENSG00000227373	AL121983.2	chr1:174155697:174158887:clu_29280_?:ENSG00000227373	A	G	-25901	0.229167	35	44	9.29477e-19	1.25914	0.111724	1.36398e-19	1.24995e-12	3.3146e-05
1	174134368	1:174134368:A:G	ENSG00000227373	AL121983.2	chr1:174155697:174158887:clu_29280_?:ENSG00000227373	G	A	-25797	0.229167	35	44	9.29477e-19	1.25914	0.111724	1.36398e-19	1.24995e-12	3.3146e-05
1	174134368	1:174134368:A:G	ENSG00000227373	AL121983.2	chr1:174155697:174159917:clu_29280_?:ENSG00000227373	G	A	-25797	0.229167	35	44	1.41616e-06	-0.862899	0.166712	1.36398e-19	1.24995e-12	3.3146e-05
1	174135385	1:174135385:T:G	ENSG00000227373	AL121983.2	chr1:174155697:174158887:clu_29280_?:ENSG00000227373	G	T	-24780	0.114583	16	22	1.05363e-11	1.17221	0.149803	1.36398e-19	1.24995e-12	3.3146e-05
1	174135473	1:174135473:A:T	ENSG00000227373	AL121983.2	chr1:174155697:174158887:clu_29280_?:ENSG00000227373	T	A	-24692	0.229167	35	44	9.29477e-19	1.25914	0.111724	1.36398e-19	1.24995e-12	3.3146e-05
1	174135473	1:174135473:A:T	ENSG00000227373	AL121983.2	chr1:174155697:174159917:clu_29280_?:ENSG00000227373	T	A	-24692	0.229167	35	44	1.41616e-06	-0.862899	0.166712	1.36398e-19	1.24995e-12	3.3146e-05
1	174135605	1:174135605:G:A	ENSG00000227373	AL121983.2	chr1:174155697:174158887:clu_29280_?:ENSG00000227373	G	A	-24560	0.578125	59	81	2.36351e-05	0.570533	0.127773	1.36398e-19	1.24995e-12	3.3146e-05
1	174138555	1:174138555:G:A	ENSG00000227373	AL121983.2	chr1:174155697:174159917:clu_29280_?:ENSG00000227373	A	G	-21610	0.229167	35	44	1.41616e-06	-0.862899	0.166712	1.36398e-19	1.24995e-12	3.3146e-05
1	174138555	1:174138555:G:A	ENSG00000227373	AL121983.2	chr1:174155697:174158887:clu_29280_?:ENSG00000227373	A	G	-21610	0.229167	35	44	9.29477e-19	1.25914	0.111724	1.36398e-19	1.24995e-12	3.3146e-05
1	174138752	1:174138752:T:A	ENSG00000227373	AL121983.2	chr1:174155697:174158887:clu_29280_?:ENSG00000227373	A	T	-21413	0.114583	16	22	1.05363e-11	1.17221	0.149803	1.36398e-19	1.24995e-12	3.3146e-05
1	174142049	1:174142049:A:C	ENSG00000227373	AL121983.2	chr1:174155697:174158887:clu_29280_?:ENSG00000227373	C	A	-18116	0.109375	15	21	4.93347e-10	1.11387	0.159218	1.36398e-19	1.24995e-12	3.3146e-05
1	174142053	1:174142053:A:C	ENSG00000227373	AL121983.2	chr1:174155697:174158887:clu_29280_?:ENSG00000227373	C	A	-18112	0.109375	15	21	4.93347e-10	1.11387	0.159218	1.36398e-19	1.24995e-12	3.3146e-05
1	174142054	1:174142054:C:A	ENSG00000227373	AL121983.2	chr1:174155697:174158887:clu_29280_?:ENSG00000227373	A	C	-18111	0.125	18	24	5.19665e-08	0.970308	0.162909	1.36398e-19	1.24995e-12	3.3146e-05
1	174144204	1:174144204:C:T	ENSG00000227373	AL121983.2	chr1:174155697:174159917:clu_29280_?:ENSG00000227373	T	C	-15961	0.229167	35	44	1.41616e-06	-0.862899	0.166712	1.36398e-19	1.24995e-12	3.3146e-05
1	174144204	1:174144204:C:T	ENSG00000227373	AL121983.2	chr1:174155697:174158887:clu_29280_?:ENSG00000227373	T	C	-15961	0.229167	35	44	9.29477e-19	1.25914	0.111724	1.36398e-19	1.24995e-12	3.3146e-05
1	174144237	1:174144237:A:G	ENSG00000227373	AL121983.2	chr1:174155697:174159917:clu_29280_?:ENSG00000227373	G	A	-15928	0.229167	35	44	1.41616e-06	-0.862899	0.166712	1.36398e-19	1.24995e-12	3.3146e-05
1	174144237	1:174144237:A:G	ENSG00000227373	AL121983.2	chr1:174155697:174158887:clu_29280_?:ENSG00000227373	G	A	-15928	0.229167	35	44	9.29477e-19	1.25914	0.111724	1.36398e-19	1.24995e-12	3.3146e-05
1	174144554	1:174144554:T:C	ENSG00000227373	AL121983.2	chr1:174155697:174158887:clu_29280_?:ENSG00000227373	C	T	-15611	0.229167	35	44	9.29477e-19	1.25914	0.111724	1.36398e-19	1.24995e-12	3.3146e-05
1	174144554	1:174144554:T:C	ENSG00000227373	AL121983.2	chr1:174155697:174159917:clu_29280_?:ENSG00000227373	C	T	-15611	0.229167	35	44	1.41616e-06	-0.862899	0.166712	1.36398e-19	1.24995e-12	3.3146e-05
1	174147434	1:174147434:C:G	ENSG00000227373	AL121983.2	chr1:174155697:174158887:clu_29280_?:ENSG00000227373	G	C	-12731	0.114583	16	22	1.05363e-11	1.17221	0.149803	1.36398e-19	1.24995e-12	3.3146e-05
1	174148051	1:174148051:A:G	ENSG00000227373	AL121983.2	chr1:174155697:174158887:clu_29280_?:ENSG00000227373	G	A	-12114	0.229167	35	44	9.29477e-19	1.25914	0.111724	1.36398e-19	1.24995e-12	3.3146e-05
1	174148051	1:174148051:A:G	ENSG00000227373	AL121983.2	chr1:174155697:174159917:clu_29280_?:ENSG00000227373	G	A	-12114	0.229167	35	44	1.41616e-06	-0.862899	0.166712	1.36398e-19	1.24995e-12	3.3146e-05
1	174149572	1:174149572:C:T	ENSG00000227373	AL121983.2	chr1:174155697:174159917:clu_29280_?:ENSG00000227373	T	C	-10593	0.234375	36	45	9.1747e-07	-0.887628	0.168071	1.36398e-19	1.24995e-12	3.3146e-05
1	174149572	1:174149572:C:T	ENSG00000227373	AL121983.2	chr1:174155697:174158887:clu_29280_?:ENSG00000227373	T	C	-10593	0.234375	36	45	3.40606e-18	1.26228	0.114844	1.36398e-19	1.24995e-12	3.3146e-05
1	174150682	1:174150682:G:A	ENSG00000227373	AL121983.2	chr1:174155697:174158887:clu_29280_?:ENSG00000227373	A	G	-9483	0.114583	16	22	1.05363e-11	1.17221	0.149803	1.36398e-19	1.24995e-12	3.3146e-05
1	174151296	1:174151296:A:G	ENSG00000227373	AL121983.2	chr1:174155697:174158887:clu_29280_?:ENSG00000227373	G	A	-8869	0.234375	36	45	3.40606e-18	1.26228	0.114844	1.36398e-19	1.24995e-12	3.3146e-05
1	174151296	1:174151296:A:G	ENSG00000227373	AL121983.2	chr1:174155697:174159917:clu_29280_?:ENSG00000227373	G	A	-8869	0.234375	36	45	9.1747e-07	-0.887628	0.168071	1.36398e-19	1.24995e-12	3.3146e-05
1	174152180	1:174152180:G:A	ENSG00000227373	AL121983.2	chr1:174155697:174159917:clu_29280_?:ENSG00000227373	A	G	-7985	0.229167	35	44	1.41616e-06	-0.862899	0.166712	1.36398e-19	1.24995e-12	3.3146e-05
1	174152180	1:174152180:G:A	ENSG00000227373	AL121983.2	chr1:174155697:174158887:clu_29280_?:ENSG00000227373	A	G	-7985	0.229167	35	44	9.29477e-19	1.25914	0.111724	1.36398e-19	1.24995e-12	3.3146e-05
1	174152782	1:174152782:T:C	ENSG00000227373	AL121983.2	chr1:174155697:174158887:clu_29280_?:ENSG00000227373	C	T	-7383	0.229167	35	44	9.29477e-19	1.25914	0.111724	1.36398e-19	1.24995e-12	3.3146e-05
1	174152782	1:174152782:T:C	ENSG00000227373	AL121983.2	chr1:174155697:174159917:clu_29280_?:ENSG00000227373	C	T	-7383	0.229167	35	44	1.41616e-06	-0.862899	0.166712	1.36398e-19	1.24995e-12	3.3146e-05
1	174159002	1:174159002:C:A	ENSG00000227373	AL121983.2	chr1:174155697:174159917:clu_29280_?:ENSG00000227373	A	C	-1163	0.229167	35	44	1.41616e-06	-0.862899	0.166712	1.36398e-19	1.24995e-12	3.3146e-05
1	174159002	1:174159002:C:A	ENSG00000227373	AL121983.2	chr1:174155697:174158887:clu_29280_?:ENSG00000227373	A	C	-1163	0.229167	35	44	9.29477e-19	1.25914	0.111724	1.36398e-19	1.24995e-12	3.3146e-05
1	174166078	1:174166078:G:A	ENSG00000227373	AL121983.2	chr1:174155697:174158887:clu_29280_?:ENSG00000227373	A	G	5913	0.229167	35	44	9.29477e-19	1.25914	0.111724	1.36398e-19	1.24995e-12	3.3146e-05
1	174166078	1:174166078:G:A	ENSG00000227373	AL121983.2	chr1:174155697:174159917:clu_29280_?:ENSG00000227373	A	G	5913	0.229167	35	44	1.41616e-06	-0.862899	0.166712	1.36398e-19	1.24995e-12	3.3146e-05
1	174166437	1:174166437:G:A	ENSG00000227373	AL121983.2	chr1:174155697:174158887:clu_29280_?:ENSG00000227373	A	G	6272	0.114583	16	22	1.05363e-11	1.17221	0.149803	1.36398e-19	1.24995e-12	3.3146e-05
1	174167236	1:174167236:A:C	ENSG00000227373	AL121983.2	chr1:174155697:174158887:clu_29280_?:ENSG00000227373	C	A	7071	0.229167	35	44	9.29477e-19	1.25914	0.111724	1.36398e-19	1.24995e-12	3.3146e-05
1	174167236	1:174167236:A:C	ENSG00000227373	AL121983.2	chr1:174155697:174159917:clu_29280_?:ENSG00000227373	C	A	7071	0.229167	35	44	1.41616e-06	-0.862899	0.166712	1.36398e-19	1.24995e-12	3.3146e-05
1	174168135	1:174168135:T:C	ENSG00000227373	AL121983.2	chr1:174155697:174158887:clu_29280_?:ENSG00000227373	C	T	7970	0.229167	35	44	9.29477e-19	1.25914	0.111724	1.36398e-19	1.24995e-12	3.3146e-05
1	174168135	1:174168135:T:C	ENSG00000227373	AL121983.2	chr1:174155697:174159917:clu_29280_?:ENSG00000227373	C	T	7970	0.229167	35	44	1.41616e-06	-0.862899	0.166712	1.36398e-19	1.24995e-12	3.3146e-05
1	174169373	1:174169373:C:T	ENSG00000227373	AL121983.2	chr1:174155697:174158887:clu_29280_?:ENSG00000227373	T	C	9208	0.114583	16	22	1.05363e-11	1.17221	0.149803	1.36398e-19	1.24995e-12	3.3146e-05
1	174169876	1:174169876:G:A	ENSG00000227373	AL121983.2	chr1:174155697:174159917:clu_29280_?:ENSG00000227373	A	G	9711	0.229167	35	44	1.41616e-06	-0.862899	0.166712	1.36398e-19	1.24995e-12	3.3146e-05
1	174169876	1:174169876:G:A	ENSG00000227373	AL121983.2	chr1:174155697:174158887:clu_29280_?:ENSG00000227373	A	G	9711	0.229167	35	44	9.29477e-19	1.25914	0.111724	1.36398e-19	1.24995e-12	3.3146e-05
1	174171090	1:174171090:G:C	ENSG00000227373	AL121983.2	chr1:174155697:174158887:clu_29280_?:ENSG00000227373	C	G	10925	0.114583	16	22	1.05363e-11	1.17221	0.149803	1.36398e-19	1.24995e-12	3.3146e-05
1	174171862	1:174171862:A:G	ENSG00000227373	AL121983.2	chr1:174155697:174158887:clu_29280_?:ENSG00000227373	G	A	11697	0.114583	16	22	1.05363e-11	1.17221	0.149803	1.36398e-19	1.24995e-12	3.3146e-05
1	174172214	1:174172215:G:A	ENSG00000227373	AL121983.2	chr1:174155697:174158887:clu_29280_?:ENSG00000227373	A	G	12049	0.114583	16	22	1.05363e-11	1.17221	0.149803	1.36398e-19	1.24995e-12	3.3146e-05
1	174172999	1:174172999:G:A	ENSG00000227373	AL121983.2	chr1:174155697:174158887:clu_29280_?:ENSG00000227373	A	G	12834	0.229167	35	44	9.29477e-19	1.25914	0.111724	1.36398e-19	1.24995e-12	3.3146e-05
1	174172999	1:174172999:G:A	ENSG00000227373	AL121983.2	chr1:174155697:174159917:clu_29280_?:ENSG00000227373	A	G	12834	0.229167	35	44	1.41616e-06	-0.862899	0.166712	1.36398e-19	1.24995e-12	3.3146e-05
1	174175545	1:174175545:T:C	ENSG00000227373	AL121983.2	chr1:174155697:174158887:clu_29280_?:ENSG00000227373	C	T	15380	0.229167	35	44	9.29477e-19	1.25914	0.111724	1.36398e-19	1.24995e-12	3.3146e-05
1	174175545	1:174175545:T:C	ENSG00000227373	AL121983.2	chr1:174155697:174159917:clu_29280_?:ENSG00000227373	C	T	15380	0.229167	35	44	1.41616e-06	-0.862899	0.166712	1.36398e-19	1.24995e-12	3.3146e-05
1	174176206	1:174176206:G:A	ENSG00000227373	AL121983.2	chr1:174155697:174158887:clu_29280_?:ENSG00000227373	A	G	16041	0.114583	16	22	1.05363e-11	1.17221	0.149803	1.36398e-19	1.24995e-12	3.3146e-05
1	174176323	1:174176323:A:C	ENSG00000227373	AL121983.2	chr1:174155697:174158887:clu_29280_?:ENSG00000227373	C	A	16158	0.119792	17	23	1.46345e-11	1.15376	0.148779	1.36398e-19	1.24995e-12	3.3146e-05
1	174176323	1:174176323:A:C	ENSG00000227373	AL121983.2	chr1:174155697:174159917:clu_29280_?:ENSG00000227373	C	A	16158	0.119792	17	23	2.01864e-05	-0.854919	0.189706	1.36398e-19	1.24995e-12	3.3146e-05
1	174178378	1:174178378:G:A	ENSG00000227373	AL121983.2	chr1:174155697:174158887:clu_29280_?:ENSG00000227373	A	G	18213	0.338542	42	65	1.21308e-09	0.967468	0.142299	1.36398e-19	1.24995e-12	3.3146e-05
1	174178465	1:174178465:A:G	ENSG00000227373	AL121983.2	chr1:174155697:174158887:clu_29280_?:ENSG00000227373	G	A	18300	0.229167	35	44	9.29477e-19	1.25914	0.111724	1.36398e-19	1.24995e-12	3.3146e-05
1	174178465	1:174178465:A:G	ENSG00000227373	AL121983.2	chr1:174155697:174159917:clu_29280_?:ENSG00000227373	G	A	18300	0.229167	35	44	1.41616e-06	-0.862899	0.166712	1.36398e-19	1.24995e-12	3.3146e-05
1	174178848	1:174178848:G:A	ENSG00000227373	AL121983.2	chr1:174155697:174159917:clu_29280_?:ENSG00000227373	A	G	18683	0.229167	35	44	1.41616e-06	-0.862899	0.166712	1.36398e-19	1.24995e-12	3.3146e-05
1	174178848	1:174178848:G:A	ENSG00000227373	AL121983.2	chr1:174155697:174158887:clu_29280_?:ENSG00000227373	A	G	18683	0.229167	35	44	9.29477e-19	1.25914	0.111724	1.36398e-19	1.24995e-12	3.3146e-05
1	174179346	1:174179346:C:T	ENSG00000227373	AL121983.2	chr1:174155697:174159917:clu_29280_?:ENSG00000227373	T	C	19181	0.119792	17	23	2.01864e-05	-0.854919	0.189706	1.36398e-19	1.24995e-12	3.3146e-05
1	174179346	1:174179346:C:T	ENSG00000227373	AL121983.2	chr1:174155697:174158887:clu_29280_?:ENSG00000227373	T	C	19181	0.119792	17	23	1.46345e-11	1.15376	0.148779	1.36398e-19	1.24995e-12	3.3146e-05
1	174180224	1:174180224:A:T	ENSG00000227373	AL121983.2	chr1:174155697:174158887:clu_29280_?:ENSG00000227373	T	A	20059	0.229167	35	44	9.29477e-19	1.25914	0.111724	1.36398e-19	1.24995e-12	3.3146e-05
1	174180224	1:174180224:A:T	ENSG00000227373	AL121983.2	chr1:174155697:174159917:clu_29280_?:ENSG00000227373	T	A	20059	0.229167	35	44	1.41616e-06	-0.862899	0.166712	1.36398e-19	1.24995e-12	3.3146e-05
1	174180326	1:174180326:C:T	ENSG00000227373	AL121983.2	chr1:174155697:174158887:clu_29280_?:ENSG00000227373	T	C	20161	0.229167	35	44	9.29477e-19	1.25914	0.111724	1.36398e-19	1.24995e-12	3.3146e-05
1	174180326	1:174180326:C:T	ENSG00000227373	AL121983.2	chr1:174155697:174159917:clu_29280_?:ENSG00000227373	T	C	20161	0.229167	35	44	1.41616e-06	-0.862899	0.166712	1.36398e-19	1.24995e-12	3.3146e-05
1	174180403	1:174180403:T:G	ENSG00000227373	AL121983.2	chr1:174155697:174158887:clu_29280_?:ENSG00000227373	G	T	20238	0.229167	35	44	9.29477e-19	1.25914	0.111724	1.36398e-19	1.24995e-12	3.3146e-05
1	174180403	1:174180403:T:G	ENSG00000227373	AL121983.2	chr1:174155697:174159917:clu_29280_?:ENSG00000227373	G	T	20238	0.229167	35	44	1.41616e-06	-0.862899	0.166712	1.36398e-19	1.24995e-12	3.3146e-05
1	174180977	1:174180977:A:C	ENSG00000227373	AL121983.2	chr1:174155697:174159917:clu_29280_?:ENSG00000227373	C	A	20812	0.223958	34	43	1.4836e-05	-0.776262	0.169242	1.36398e-19	1.24995e-12	3.3146e-05
1	174180977	1:174180977:A:C	ENSG00000227373	AL121983.2	chr1:174155697:174158887:clu_29280_?:ENSG00000227373	C	A	20812	0.223958	34	43	5.61388e-18	1.22781	0.112806	1.36398e-19	1.24995e-12	3.3146e-05
1	174184032	1:174184032:A:G	ENSG00000227373	AL121983.2	chr1:174155697:174158887:clu_29280_?:ENSG00000227373	G	A	23867	0.229167	35	44	9.29477e-19	1.25914	0.111724	1.36398e-19	1.24995e-12	3.3146e-05
1	174184032	1:174184032:A:G	ENSG00000227373	AL121983.2	chr1:174155697:174159917:clu_29280_?:ENSG00000227373	G	A	23867	0.229167	35	44	1.41616e-06	-0.862899	0.166712	1.36398e-19	1.24995e-12	3.3146e-05
1	174184146	1:174184146:T:C	ENSG00000227373	AL121983.2	chr1:174155697:174158887:clu_29280_?:ENSG00000227373	C	T	23981	0.229167	35	44	9.29477e-19	1.25914	0.111724	1.36398e-19	1.24995e-12	3.3146e-05
1	174184146	1:174184146:T:C	ENSG00000227373	AL121983.2	chr1:174155697:174159917:clu_29280_?:ENSG00000227373	C	T	23981	0.229167	35	44	1.41616e-06	-0.862899	0.166712	1.36398e-19	1.24995e-12	3.3146e-05
1	174185943	1:174185943:C:A	ENSG00000227373	AL121983.2	chr1:174155697:174158887:clu_29280_?:ENSG00000227373	A	C	25778	0.229167	35	44	9.29477e-19	1.25914	0.111724	1.36398e-19	1.24995e-12	3.3146e-05
1	174185943	1:174185943:C:A	ENSG00000227373	AL121983.2	chr1:174155697:174159917:clu_29280_?:ENSG00000227373	A	C	25778	0.229167	35	44	1.41616e-06	-0.862899	0.166712	1.36398e-19	1.24995e-12	3.3146e-05
1	174189002	1:174189002:G:A	ENSG00000227373	AL121983.2	chr1:174155697:174158887:clu_29280_?:ENSG00000227373	A	G	28837	0.229167	35	44	9.29477e-19	1.25914	0.111724	1.36398e-19	1.24995e-12	3.3146e-05
1	174189002	1:174189002:G:A	ENSG00000227373	AL121983.2	chr1:174155697:174159917:clu_29280_?:ENSG00000227373	A	G	28837	0.229167	35	44	1.41616e-06	-0.862899	0.166712	1.36398e-19	1.24995e-12	3.3146e-05
1	174189975	1:174189975:G:C	ENSG00000227373	AL121983.2	chr1:174155697:174159917:clu_29280_?:ENSG00000227373	C	G	29810	0.229167	35	44	1.41616e-06	-0.862899	0.166712	1.36398e-19	1.24995e-12	3.3146e-05
1	174189975	1:174189975:G:C	ENSG00000227373	AL121983.2	chr1:174155697:174158887:clu_29280_?:ENSG00000227373	C	G	29810	0.229167	35	44	9.29477e-19	1.25914	0.111724	1.36398e-19	1.24995e-12	3.3146e-05
1	174191901	1:174191901:A:G	ENSG00000227373	AL121983.2	chr1:174155697:174159917:clu_29280_?:ENSG00000227373	G	A	31736	0.119792	17	23	2.01864e-05	-0.854919	0.189706	1.36398e-19	1.24995e-12	3.3146e-05
1	174191901	1:174191901:A:G	ENSG00000227373	AL121983.2	chr1:174155697:174158887:clu_29280_?:ENSG00000227373	G	A	31736	0.119792	17	23	1.46345e-11	1.15376	0.148779	1.36398e-19	1.24995e-12	3.3146e-05
1	174195464	1:174195464:C:T	ENSG00000227373	AL121983.2	chr1:174155697:174158887:clu_29280_?:ENSG00000227373	T	C	35299	0.114583	16	22	1.05363e-11	1.17221	0.149803	1.36398e-19	1.24995e-12	3.3146e-05
1	174195914	1:174195914:C:T	ENSG00000227373	AL121983.2	chr1:174155697:174159917:clu_29280_?:ENSG00000227373	T	C	35749	0.229167	35	44	1.41616e-06	-0.862899	0.166712	1.36398e-19	1.24995e-12	3.3146e-05
1	174195914	1:174195914:C:T	ENSG00000227373	AL121983.2	chr1:174155697:174158887:clu_29280_?:ENSG00000227373	T	C	35749	0.229167	35	44	9.29477e-19	1.25914	0.111724	1.36398e-19	1.24995e-12	3.3146e-05
1	174199667	1:174199667:G:T	ENSG00000227373	AL121983.2	chr1:174155697:174158887:clu_29280_?:ENSG00000227373	T	G	39502	0.484375	59	93	6.94348e-06	0.691981	0.14473	1.36398e-19	1.24995e-12	3.3146e-05
1	174200481	1:174200481:A:G	ENSG00000227373	AL121983.2	chr1:174155697:174159917:clu_29280_?:ENSG00000227373	G	A	40316	0.229167	35	44	1.41616e-06	-0.862899	0.166712	1.36398e-19	1.24995e-12	3.3146e-05
1	174200481	1:174200481:A:G	ENSG00000227373	AL121983.2	chr1:174155697:174158887:clu_29280_?:ENSG00000227373	G	A	40316	0.229167	35	44	9.29477e-19	1.25914	0.111724	1.36398e-19	1.24995e-12	3.3146e-05
1	174200867	1:174200867:T:C	ENSG00000227373	AL121983.2	chr1:174155697:174158887:clu_29280_?:ENSG00000227373	C	T	40702	0.484375	59	93	6.94348e-06	0.691981	0.14473	1.36398e-19	1.24995e-12	3.3146e-05
1	174203246	1:174203246:T:C	ENSG00000227373	AL121983.2	chr1:174155697:174158887:clu_29280_?:ENSG00000227373	C	T	43081	0.338542	42	65	1.21308e-09	0.967468	0.142299	1.36398e-19	1.24995e-12	3.3146e-05
1	174204917	1:174204917:A:C	ENSG00000227373	AL121983.2	chr1:174155697:174158887:clu_29280_?:ENSG00000227373	C	A	44752	0.229167	35	44	9.29477e-19	1.25914	0.111724	1.36398e-19	1.24995e-12	3.3146e-05
1	174204917	1:174204917:A:C	ENSG00000227373	AL121983.2	chr1:174155697:174159917:clu_29280_?:ENSG00000227373	C	A	44752	0.229167	35	44	1.41616e-06	-0.862899	0.166712	1.36398e-19	1.24995e-12	3.3146e-05
1	174210205	1:174210205:C:T	ENSG00000227373	AL121983.2	chr1:174155697:174159917:clu_29280_?:ENSG00000227373	T	C	50040	0.229167	35	44	1.41616e-06	-0.862899	0.166712	1.36398e-19	1.24995e-12	3.3146e-05
1	174210205	1:174210205:C:T	ENSG00000227373	AL121983.2	chr1:174155697:174158887:clu_29280_?:ENSG00000227373	T	C	50040	0.229167	35	44	9.29477e-19	1.25914	0.111724	1.36398e-19	1.24995e-12	3.3146e-05
1	174212218	1:174212218:G:A	ENSG00000227373	AL121983.2	chr1:174155697:174158887:clu_29280_?:ENSG00000227373	A	G	52053	0.338542	42	65	1.21308e-09	0.967468	0.142299	1.36398e-19	1.24995e-12	3.3146e-05
1	174212747	1:174212747:C:T	ENSG00000227373	AL121983.2	chr1:174155697:174158887:clu_29280_?:ENSG00000227373	T	C	52582	0.484375	59	93	6.94348e-06	0.691981	0.14473	1.36398e-19	1.24995e-12	3.3146e-05
1	174213771	1:174213771:C:T	ENSG00000227373	AL121983.2	chr1:174155697:174158887:clu_29280_?:ENSG00000227373	T	C	53606	0.229167	35	44	9.29477e-19	1.25914	0.111724	1.36398e-19	1.24995e-12	3.3146e-05
1	174213771	1:174213771:C:T	ENSG00000227373	AL121983.2	chr1:174155697:174159917:clu_29280_?:ENSG00000227373	T	C	53606	0.229167	35	44	1.41616e-06	-0.862899	0.166712	1.36398e-19	1.24995e-12	3.3146e-05
1	174215470	1:174215470:T:A	ENSG00000227373	AL121983.2	chr1:174155697:174158887:clu_29280_?:ENSG00000227373	A	T	55305	0.223958	34	43	6.28318e-18	1.2262	0.112907	1.36398e-19	1.24995e-12	3.3146e-05
1	174215470	1:174215470:T:A	ENSG00000227373	AL121983.2	chr1:174155697:174159917:clu_29280_?:ENSG00000227373	A	T	55305	0.223958	34	43	1.80841e-06	-0.845864	0.165329	1.36398e-19	1.24995e-12	3.3146e-05
1	174219147	1:174219147:G:A	ENSG00000227373	AL121983.2	chr1:174155697:174159917:clu_29280_?:ENSG00000227373	A	G	58982	0.229167	35	44	1.41616e-06	-0.862899	0.166712	1.36398e-19	1.24995e-12	3.3146e-05
1	174219147	1:174219147:G:A	ENSG00000227373	AL121983.2	chr1:174155697:174158887:clu_29280_?:ENSG00000227373	A	G	58982	0.229167	35	44	9.29477e-19	1.25914	0.111724	1.36398e-19	1.24995e-12	3.3146e-05
1	174220131	1:174220131:T:C	ENSG00000227373	AL121983.2	chr1:174155697:174158887:clu_29280_?:ENSG00000227373	C	T	59966	0.484375	59	93	6.94348e-06	0.691981	0.14473	1.36398e-19	1.24995e-12	3.3146e-05
1	174220266	1:174220266:T:G	ENSG00000227373	AL121983.2	chr1:174155697:174159917:clu_29280_?:ENSG00000227373	G	T	60101	0.229167	35	44	1.41616e-06	-0.862899	0.166712	1.36398e-19	1.24995e-12	3.3146e-05
1	174220266	1:174220266:T:G	ENSG00000227373	AL121983.2	chr1:174155697:174158887:clu_29280_?:ENSG00000227373	G	T	60101	0.229167	35	44	9.29477e-19	1.25914	0.111724	1.36398e-19	1.24995e-12	3.3146e-05
1	174223322	1:174223322:A:G	ENSG00000227373	AL121983.2	chr1:174155697:174158887:clu_29280_?:ENSG00000227373	G	A	63157	0.114583	16	22	1.05363e-11	1.17221	0.149803	1.36398e-19	1.24995e-12	3.3146e-05
1	174223973	1:174223973:G:T	ENSG00000227373	AL121983.2	chr1:174155697:174159917:clu_29280_?:ENSG00000227373	T	G	63808	0.229167	35	44	1.41616e-06	-0.862899	0.166712	1.36398e-19	1.24995e-12	3.3146e-05
1	174223973	1:174223973:G:T	ENSG00000227373	AL121983.2	chr1:174155697:174158887:clu_29280_?:ENSG00000227373	T	G	63808	0.229167	35	44	9.29477e-19	1.25914	0.111724	1.36398e-19	1.24995e-12	3.3146e-05
1	174224564	1:174224564:T:C	ENSG00000227373	AL121983.2	chr1:174155697:174158887:clu_29280_?:ENSG00000227373	C	T	64399	0.338542	42	65	1.21308e-09	0.967468	0.142299	1.36398e-19	1.24995e-12	3.3146e-05
1	174226923	1:174226923:C:G	ENSG00000227373	AL121983.2	chr1:174155697:174159917:clu_29280_?:ENSG00000227373	G	C	66758	0.229167	35	44	1.41616e-06	-0.862899	0.166712	1.36398e-19	1.24995e-12	3.3146e-05
1	174226923	1:174226923:C:G	ENSG00000227373	AL121983.2	chr1:174155697:174158887:clu_29280_?:ENSG00000227373	G	C	66758	0.229167	35	44	9.29477e-19	1.25914	0.111724	1.36398e-19	1.24995e-12	3.3146e-05
1	174229622	1:174229622:G:A	ENSG00000227373	AL121983.2	chr1:174155697:174158887:clu_29280_?:ENSG00000227373	A	G	69457	0.114583	16	22	1.05363e-11	1.17221	0.149803	1.36398e-19	1.24995e-12	3.3146e-05
1	174229765	1:174229765:A:C	ENSG00000227373	AL121983.2	chr1:174155697:174158887:clu_29280_?:ENSG00000227373	C	A	69600	0.338542	42	65	1.21308e-09	0.967468	0.142299	1.36398e-19	1.24995e-12	3.3146e-05
1	174230438	1:174230438:G:A	ENSG00000227373	AL121983.2	chr1:174155697:174158887:clu_29280_?:ENSG00000227373	A	G	70273	0.338542	42	65	1.21308e-09	0.967468	0.142299	1.36398e-19	1.24995e-12	3.3146e-05
1	174232357	1:174232357:C:T	ENSG00000227373	AL121983.2	chr1:174155697:174158887:clu_29280_?:ENSG00000227373	T	C	72192	0.114583	16	22	1.05363e-11	1.17221	0.149803	1.36398e-19	1.24995e-12	3.3146e-05
1	174232776	1:174232776:T:A	ENSG00000227373	AL121983.2	chr1:174155697:174158887:clu_29280_?:ENSG00000227373	A	T	72611	0.203125	31	39	3.91774e-07	0.768005	0.140021	1.36398e-19	1.24995e-12	3.3146e-05
1	174233081	1:174233081:T:C	ENSG00000227373	AL121983.2	chr1:174155697:174158887:clu_29280_?:ENSG00000227373	C	T	72916	0.114583	16	22	1.05363e-11	1.17221	0.149803	1.36398e-19	1.24995e-12	3.3146e-05
1	174234717	1:174234717:C:T	ENSG00000227373	AL121983.2	chr1:174155697:174158887:clu_29280_?:ENSG00000227373	T	C	74552	0.114583	16	22	1.05363e-11	1.17221	0.149803	1.36398e-19	1.24995e-12	3.3146e-05
1	174234783	1:174234783:G:T	ENSG00000227373	AL121983.2	chr1:174155697:174158887:clu_29280_?:ENSG00000227373	T	G	74618	0.223958	34	43	5.61388e-18	1.22781	0.112806	1.36398e-19	1.24995e-12	3.3146e-05
1	174234783	1:174234783:G:T	ENSG00000227373	AL121983.2	chr1:174155697:174159917:clu_29280_?:ENSG00000227373	T	G	74618	0.223958	34	43	1.4836e-05	-0.776262	0.169242	1.36398e-19	1.24995e-12	3.3146e-05
1	174235093	1:174235093:C:G	ENSG00000227373	AL121983.2	chr1:174155697:174159917:clu_29280_?:ENSG00000227373	G	C	74928	0.229167	35	44	1.41616e-06	-0.862899	0.166712	1.36398e-19	1.24995e-12	3.3146e-05
1	174235093	1:174235093:C:G	ENSG00000227373	AL121983.2	chr1:174155697:174158887:clu_29280_?:ENSG00000227373	G	C	74928	0.229167	35	44	9.29477e-19	1.25914	0.111724	1.36398e-19	1.24995e-12	3.3146e-05
1	174236990	1:174236990:T:C	ENSG00000227373	AL121983.2	chr1:174155697:174158887:clu_29280_?:ENSG00000227373	C	T	76825	0.109375	21	21	3.00755e-05	1.43672	0.326406	1.36398e-19	1.24995e-12	3.3146e-05
1	174238177	1:174238177:T:G	ENSG00000227373	AL121983.2	chr1:174155697:174159917:clu_29280_?:ENSG00000227373	G	T	78012	0.229167	35	44	1.41616e-06	-0.862899	0.166712	1.36398e-19	1.24995e-12	3.3146e-05
1	174238177	1:174238177:T:G	ENSG00000227373	AL121983.2	chr1:174155697:174158887:clu_29280_?:ENSG00000227373	G	T	78012	0.229167	35	44	9.29477e-19	1.25914	0.111724	1.36398e-19	1.24995e-12	3.3146e-05
1	174238740	1:174238740:T:C	ENSG00000227373	AL121983.2	chr1:174155697:174158887:clu_29280_?:ENSG00000227373	C	T	78575	0.338542	42	65	1.21308e-09	0.967468	0.142299	1.36398e-19	1.24995e-12	3.3146e-05
1	174238810	1:174238810:C:T	ENSG00000227373	AL121983.2	chr1:174155697:174159917:clu_29280_?:ENSG00000227373	T	C	78645	0.223958	34	43	1.2659e-06	-0.8573	0.164761	1.36398e-19	1.24995e-12	3.3146e-05
1	174238810	1:174238810:C:T	ENSG00000227373	AL121983.2	chr1:174155697:174158887:clu_29280_?:ENSG00000227373	T	C	78645	0.223958	34	43	1.36399e-19	1.2641	0.108186	1.36398e-19	1.24995e-12	3.3146e-05
1	174238849	1:174238849:G:A	ENSG00000227373	AL121983.2	chr1:174155697:174158887:clu_29280_?:ENSG00000227373	A	G	78684	0.0885417	13	17	5.00282e-06	0.969028	0.19923	1.36398e-19	1.24995e-12	3.3146e-05
1	174239115	1:174239115:C:A	ENSG00000227373	AL121983.2	chr1:174155697:174159917:clu_29280_?:ENSG00000227373	A	C	78950	0.229167	35	44	1.41616e-06	-0.862899	0.166712	1.36398e-19	1.24995e-12	3.3146e-05
1	174239115	1:174239115:C:A	ENSG00000227373	AL121983.2	chr1:174155697:174158887:clu_29280_?:ENSG00000227373	A	C	78950	0.229167	35	44	9.29477e-19	1.25914	0.111724	1.36398e-19	1.24995e-12	3.3146e-05
1	174239134	1:174239134:C:G	ENSG00000227373	AL121983.2	chr1:174155697:174158887:clu_29280_?:ENSG00000227373	G	C	78969	0.229167	35	44	9.29477e-19	1.25914	0.111724	1.36398e-19	1.24995e-12	3.3146e-05
1	174239134	1:174239134:C:G	ENSG00000227373	AL121983.2	chr1:174155697:174159917:clu_29280_?:ENSG00000227373	G	C	78969	0.229167	35	44	1.41616e-06	-0.862899	0.166712	1.36398e-19	1.24995e-12	3.3146e-05
1	174240514	1:174240514:T:C	ENSG00000227373	AL121983.2	chr1:174155697:174159917:clu_29280_?:ENSG00000227373	C	T	80349	0.229167	35	44	1.41616e-06	-0.862899	0.166712	1.36398e-19	1.24995e-12	3.3146e-05
1	174240514	1:174240514:T:C	ENSG00000227373	AL121983.2	chr1:174155697:174158887:clu_29280_?:ENSG00000227373	C	T	80349	0.229167	35	44	9.29477e-19	1.25914	0.111724	1.36398e-19	1.24995e-12	3.3146e-05
1	174240771	1:174240771:T:C	ENSG00000227373	AL121983.2	chr1:174155697:174158887:clu_29280_?:ENSG00000227373	C	T	80606	0.484375	59	93	6.94348e-06	0.691981	0.14473	1.36398e-19	1.24995e-12	3.3146e-05
1	174240840	1:174240840:C:T	ENSG00000227373	AL121983.2	chr1:174155697:174159917:clu_29280_?:ENSG00000227373	T	C	80675	0.229167	35	44	1.41616e-06	-0.862899	0.166712	1.36398e-19	1.24995e-12	3.3146e-05
1	174240840	1:174240840:C:T	ENSG00000227373	AL121983.2	chr1:174155697:174158887:clu_29280_?:ENSG00000227373	T	C	80675	0.229167	35	44	9.29477e-19	1.25914	0.111724	1.36398e-19	1.24995e-12	3.3146e-05
1	174245718	1:174245718:C:T	ENSG00000227373	AL121983.2	chr1:174155697:174158887:clu_29280_?:ENSG00000227373	T	C	85553	0.229167	35	44	9.29477e-19	1.25914	0.111724	1.36398e-19	1.24995e-12	3.3146e-05
1	174245718	1:174245718:C:T	ENSG00000227373	AL121983.2	chr1:174155697:174159917:clu_29280_?:ENSG00000227373	T	C	85553	0.229167	35	44	1.41616e-06	-0.862899	0.166712	1.36398e-19	1.24995e-12	3.3146e-05
1	174247026	1:174247026:T:G	ENSG00000227373	AL121983.2	chr1:174155697:174158887:clu_29280_?:ENSG00000227373	G	T	86861	0.229167	35	44	9.29477e-19	1.25914	0.111724	1.36398e-19	1.24995e-12	3.3146e-05
1	174247026	1:174247026:T:G	ENSG00000227373	AL121983.2	chr1:174155697:174159917:clu_29280_?:ENSG00000227373	G	T	86861	0.229167	35	44	1.41616e-06	-0.862899	0.166712	1.36398e-19	1.24995e-12	3.3146e-05
1	174247553	1:174247553:T:C	ENSG00000227373	AL121983.2	chr1:174155697:174158887:clu_29280_?:ENSG00000227373	C	T	87388	0.229167	35	44	9.29477e-19	1.25914	0.111724	1.36398e-19	1.24995e-12	3.3146e-05
1	174247553	1:174247553:T:C	ENSG00000227373	AL121983.2	chr1:174155697:174159917:clu_29280_?:ENSG00000227373	C	T	87388	0.229167	35	44	1.41616e-06	-0.862899	0.166712	1.36398e-19	1.24995e-12	3.3146e-05
1	174248972	1:174248972:G:T	ENSG00000227373	AL121983.2	chr1:174155697:174158887:clu_29280_?:ENSG00000227373	T	G	88807	0.114583	16	22	1.05363e-11	1.17221	0.149803	1.36398e-19	1.24995e-12	3.3146e-05
1	174249434	1:174249434:T:C	ENSG00000227373	AL121983.2	chr1:174155697:174158887:clu_29280_?:ENSG00000227373	C	T	89269	0.484375	59	93	6.94348e-06	0.691981	0.14473	1.36398e-19	1.24995e-12	3.3146e-05
1	174249682	1:174249682:G:A	ENSG00000227373	AL121983.2	chr1:174155697:174159917:clu_29280_?:ENSG00000227373	A	G	89517	0.229167	35	44	1.41616e-06	-0.862899	0.166712	1.36398e-19	1.24995e-12	3.3146e-05
1	174249682	1:174249682:G:A	ENSG00000227373	AL121983.2	chr1:174155697:174158887:clu_29280_?:ENSG00000227373	A	G	89517	0.229167	35	44	9.29477e-19	1.25914	0.111724	1.36398e-19	1.24995e-12	3.3146e-05
1	174249806	1:174249806:C:T	ENSG00000227373	AL121983.2	chr1:174155697:174158887:clu_29280_?:ENSG00000227373	T	C	89641	0.229167	35	44	9.29477e-19	1.25914	0.111724	1.36398e-19	1.24995e-12	3.3146e-05
1	174249806	1:174249806:C:T	ENSG00000227373	AL121983.2	chr1:174155697:174159917:clu_29280_?:ENSG00000227373	T	C	89641	0.229167	35	44	1.41616e-06	-0.862899	0.166712	1.36398e-19	1.24995e-12	3.3146e-05
1	174251602	1:174251602:A:G	ENSG00000227373	AL121983.2	chr1:174155697:174158887:clu_29280_?:ENSG00000227373	G	A	91437	0.229167	35	44	9.29477e-19	1.25914	0.111724	1.36398e-19	1.24995e-12	3.3146e-05
1	174251602	1:174251602:A:G	ENSG00000227373	AL121983.2	chr1:174155697:174159917:clu_29280_?:ENSG00000227373	G	A	91437	0.229167	35	44	1.41616e-06	-0.862899	0.166712	1.36398e-19	1.24995e-12	3.3146e-05
1	174251916	1:174251916:A:T	ENSG00000227373	AL121983.2	chr1:174155697:174158887:clu_29280_?:ENSG00000227373	T	A	91751	0.114583	16	22	1.05363e-11	1.17221	0.149803	1.36398e-19	1.24995e-12	3.3146e-05
1	174253637	1:174253637:G:C	ENSG00000227373	AL121983.2	chr1:174155697:174158887:clu_29280_?:ENSG00000227373	C	G	93472	0.229167	35	44	9.29477e-19	1.25914	0.111724	1.36398e-19	1.24995e-12	3.3146e-05
1	174253637	1:174253637:G:C	ENSG00000227373	AL121983.2	chr1:174155697:174159917:clu_29280_?:ENSG00000227373	C	G	93472	0.229167	35	44	1.41616e-06	-0.862899	0.166712	1.36398e-19	1.24995e-12	3.3146e-05
1	174254096	1:174254096:T:A	ENSG00000227373	AL121983.2	chr1:174155697:174158887:clu_29280_?:ENSG00000227373	A	T	93931	0.229167	35	44	9.29477e-19	1.25914	0.111724	1.36398e-19	1.24995e-12	3.3146e-05
1	174254096	1:174254096:T:A	ENSG00000227373	AL121983.2	chr1:174155697:174159917:clu_29280_?:ENSG00000227373	A	T	93931	0.229167	35	44	1.41616e-06	-0.862899	0.166712	1.36398e-19	1.24995e-12	3.3146e-05
1	174254704	1:174254704:A:G	ENSG00000227373	AL121983.2	chr1:174155697:174158887:clu_29280_?:ENSG00000227373	G	A	94539	0.229167	35	44	9.29477e-19	1.25914	0.111724	1.36398e-19	1.24995e-12	3.3146e-05
1	174254704	1:174254704:A:G	ENSG00000227373	AL121983.2	chr1:174155697:174159917:clu_29280_?:ENSG00000227373	G	A	94539	0.229167	35	44	1.41616e-06	-0.862899	0.166712	1.36398e-19	1.24995e-12	3.3146e-05
1	174255911	1:174255911:G:A	ENSG00000227373	AL121983.2	chr1:174155697:174158887:clu_29280_?:ENSG00000227373	A	G	95746	0.114583	16	22	1.05363e-11	1.17221	0.149803	1.36398e-19	1.24995e-12	3.3146e-05
1	174256097	1:174256097:A:T	ENSG00000227373	AL121983.2	chr1:174155697:174159917:clu_29280_?:ENSG00000227373	T	A	95932	0.229167	35	44	1.41616e-06	-0.862899	0.166712	1.36398e-19	1.24995e-12	3.3146e-05
1	174256097	1:174256097:A:T	ENSG00000227373	AL121983.2	chr1:174155697:174158887:clu_29280_?:ENSG00000227373	T	A	95932	0.229167	35	44	9.29477e-19	1.25914	0.111724	1.36398e-19	1.24995e-12	3.3146e-05
1	174258295	1:174258295:T:C	ENSG00000227373	AL121983.2	chr1:174155697:174158887:clu_29280_?:ENSG00000227373	C	T	98130	0.119792	17	23	1.73759e-11	1.16505	0.15095	1.36398e-19	1.24995e-12	3.3146e-05
1	179831850	1:179831850:A:G	ENSG00000143337	TOR1AIP1	chr1:179884769:179889313:clu_29361_?:ENSG00000143337	G	A	-50746	0.401042	59	77	4.52311e-06	-0.869243	0.17779	3.07387e-15	8.6396e-09	1.62228e-05
1	179833768	1:179833768:G:T	ENSG00000143337	TOR1AIP1	chr1:179884769:179889313:clu_29361_?:ENSG00000143337	T	G	-48828	0.09375	16	18	3.31802e-06	-1.25039	0.251765	3.07387e-15	8.6396e-09	1.62228e-05
1	179834917	1:179834917:A:C	ENSG00000143337	TOR1AIP1	chr1:179884769:179889313:clu_29361_?:ENSG00000143337	C	A	-47679	0.109375	19	21	3.45855e-06	-1.18784	0.23967	3.07387e-15	8.6396e-09	1.62228e-05
1	179835306	1:179835306:T:C	ENSG00000143337	TOR1AIP1	chr1:179884769:179889313:clu_29361_?:ENSG00000143337	C	T	-47290	0.421875	63	81	1.78676e-10	-1.18991	0.164883	3.07387e-15	8.6396e-09	1.62228e-05
1	179835813	1:179835813:G:A	ENSG00000143337	TOR1AIP1	chr1:179884769:179889313:clu_29361_?:ENSG00000143337	A	G	-46783	0.109375	19	21	3.45855e-06	-1.18784	0.23967	3.07387e-15	8.6396e-09	1.62228e-05
1	179836569	1:179836569:C:G	ENSG00000143337	TOR1AIP1	chr1:179884769:179889313:clu_29361_?:ENSG00000143337	G	C	-46027	0.151042	24	29	7.61502e-06	-0.992848	0.20868	3.07387e-15	8.6396e-09	1.62228e-05
1	179837755	1:179837755:A:G	ENSG00000143337	TOR1AIP1	chr1:179884769:179889313:clu_29361_?:ENSG00000143337	G	A	-44841	0.411458	62	79	8.98071e-09	-1.11593	0.175617	3.07387e-15	8.6396e-09	1.62228e-05
1	179838146	1:179838146:A:G	ENSG00000143337	TOR1AIP1	chr1:179884769:179889313:clu_29361_?:ENSG00000143337	G	A	-44450	0.447917	63	86	1.13177e-07	-1.01136	0.175085	3.07387e-15	8.6396e-09	1.62228e-05
1	179838803	1:179838803:T:A	ENSG00000143337	TOR1AIP1	chr1:179884769:179889313:clu_29361_?:ENSG00000143337	A	T	-43793	0.411458	62	79	7.60287e-09	-1.1253	0.176056	3.07387e-15	8.6396e-09	1.62228e-05
1	179839187	1:179839187:A:G	ENSG00000143337	TOR1AIP1	chr1:179884769:179889313:clu_29361_?:ENSG00000143337	G	A	-43409	0.411458	62	79	8.98071e-09	-1.11593	0.175617	3.07387e-15	8.6396e-09	1.62228e-05
1	179843028	1:179843028:A:G	ENSG00000143337	TOR1AIP1	chr1:179884769:179889313:clu_29361_?:ENSG00000143337	A	G	-39568	0.890625	19	21	1.47969e-05	1.13344	0.247079	3.07387e-15	8.6396e-09	1.62228e-05
1	179844217	1:179844217:C:T	ENSG00000143337	TOR1AIP1	chr1:179884769:179889313:clu_29361_?:ENSG00000143337	T	C	-38379	0.411458	62	79	1.54269e-09	-1.16249	0.172325	3.07387e-15	8.6396e-09	1.62228e-05
1	179844364	1:179844364:G:A	ENSG00000143337	TOR1AIP1	chr1:179884769:179889313:clu_29361_?:ENSG00000143337	A	G	-38232	0.411458	62	79	1.54269e-09	-1.16249	0.172325	3.07387e-15	8.6396e-09	1.62228e-05
1	179844429	1:179844429:C:A	ENSG00000143337	TOR1AIP1	chr1:179884769:179889313:clu_29361_?:ENSG00000143337	A	C	-38167	0.25	38	48	1.04634e-05	-1.05292	0.225144	3.07387e-15	8.6396e-09	1.62228e-05
1	179844478	1:179844478:T:C	ENSG00000143337	TOR1AIP1	chr1:179884769:179889313:clu_29361_?:ENSG00000143337	T	C	-38118	0.5625	56	84	1.40659e-06	-1.01535	0.196103	3.07387e-15	8.6396e-09	1.62228e-05
1	179845322	1:179845322:A:C	ENSG00000143337	TOR1AIP1	chr1:179884769:179889313:clu_29361_?:ENSG00000143337	C	A	-37274	0.453125	63	87	1.28732e-07	-1.01109	0.17595	3.07387e-15	8.6396e-09	1.62228e-05
1	179848519	1:179848519:A:G	ENSG00000143337	TOR1AIP1	chr1:179884769:179889313:clu_29361_?:ENSG00000143337	G	A	-34077	0.40625	62	78	1.60061e-11	-1.27412	0.164706	3.07387e-15	8.6396e-09	1.62228e-05
[truncated: 51,293 more rows]

## Sheet: CA09
chr	BP	variant_id	group_id	phenotype_id	tss_distance	af	ma_samples	ma_count	pval_nominal	slope	slope_se	min_pval_nominal	min_qval	pval_nominal_threshold	gene_name	A1	A2
1	1609890	1:1609890:C:T	ENSG00000248333	chr1:1645262:1649499:clu_22304_?:ENSG00000248333	-49122	0.0989583	17	19	6.36678e-07	-1.10865	0.206487	7.27292e-11	0.000303647	2.42803e-06	CDK11B	T	C
1	1609890	1:1609890:C:T	ENSG00000248333	chr1:1642508:1645126:clu_22304_?:ENSG00000248333	-49122	0.0989583	17	19	1.95534e-08	1.26103	0.204084	7.27292e-11	0.000303647	2.42803e-06	CDK11B	T	C
1	1627156	1:1627156:G:A	ENSG00000248333	chr1:1642508:1645126:clu_22304_?:ENSG00000248333	-31856	0.0989583	17	19	3.84824e-08	1.23939	0.20571	7.27292e-11	0.000303647	2.42803e-06	CDK11B	A	G
1	1627156	1:1627156:G:A	ENSG00000248333	chr1:1645262:1649499:clu_22304_?:ENSG00000248333	-31856	0.0989583	17	19	1.13983e-06	-1.08708	0.207904	7.27292e-11	0.000303647	2.42803e-06	CDK11B	A	G
1	1677707	1:1677707:C:T	ENSG00000248333	chr1:1645262:1649499:clu_22304_?:ENSG00000248333	18695	0.135417	23	26	1.62005e-09	-1.19585	0.177554	7.27292e-11	0.000303647	2.42803e-06	CDK11B	T	C
1	1677707	1:1677707:C:T	ENSG00000248333	chr1:1642508:1645126:clu_22304_?:ENSG00000248333	18695	0.135417	23	26	7.27293e-11	1.30558	0.176171	7.27292e-11	0.000303647	2.42803e-06	CDK11B	T	C
1	1703669	1:1703669:G:A	ENSG00000008128	chr1:1721711:1722588:clu_22314_?:ENSG00000008128	-20688	0.276042	37	53	1.29941e-08	0.863037	0.137617	2.17529e-09	0.000874179	4.09889e-06	CDK11A	A	G
1	1703669	1:1703669:G:A	ENSG00000008128	chr1:1721711:1722708:clu_22314_?:ENSG00000008128	-20688	0.276042	37	53	2.79109e-08	-0.815014	0.133648	2.17529e-09	0.000874179	4.09889e-06	CDK11A	A	G
1	1703754	1:1703754:T:C	ENSG00000008128	chr1:1721711:1722708:clu_22314_?:ENSG00000008128	-20603	0.270833	36	52	1.78099e-08	-0.816912	0.131757	2.17529e-09	0.000874179	4.09889e-06	CDK11A	C	T
1	1703754	1:1703754:T:C	ENSG00000008128	chr1:1721711:1722588:clu_22314_?:ENSG00000008128	-20603	0.270833	36	52	8.07015e-09	0.865082	0.135628	2.17529e-09	0.000874179	4.09889e-06	CDK11A	C	T
1	1704126	1:1704126:C:T	ENSG00000008128	chr1:1721711:1722708:clu_22314_?:ENSG00000008128	-20231	0.276042	37	53	2.79109e-08	-0.815014	0.133648	2.17529e-09	0.000874179	4.09889e-06	CDK11A	T	C
1	1704126	1:1704126:C:T	ENSG00000008128	chr1:1721711:1722588:clu_22314_?:ENSG00000008128	-20231	0.276042	37	53	1.29941e-08	0.863037	0.137617	2.17529e-09	0.000874179	4.09889e-06	CDK11A	T	C
1	1704489	1:1704489:G:A	ENSG00000008128	chr1:1721711:1722588:clu_22314_?:ENSG00000008128	-19868	0.244792	33	47	2.83299e-07	0.798811	0.143629	2.17529e-09	0.000874179	4.09889e-06	CDK11A	A	G
1	1704489	1:1704489:G:A	ENSG00000008128	chr1:1721711:1722708:clu_22314_?:ENSG00000008128	-19868	0.244792	33	47	9.29954e-07	-0.739619	0.140133	2.17529e-09	0.000874179	4.09889e-06	CDK11A	A	G
1	1704504	1:1704504:A:C	ENSG00000008128	chr1:1721711:1722708:clu_22314_?:ENSG00000008128	-19853	0.276042	37	53	2.79109e-08	-0.815014	0.133648	2.17529e-09	0.000874179	4.09889e-06	CDK11A	C	A
1	1704504	1:1704504:A:C	ENSG00000008128	chr1:1721711:1722588:clu_22314_?:ENSG00000008128	-19853	0.276042	37	53	1.29941e-08	0.863037	0.137617	2.17529e-09	0.000874179	4.09889e-06	CDK11A	C	A
1	1704540	1:1704540:G:C	ENSG00000008128	chr1:1721711:1722708:clu_22314_?:ENSG00000008128	-19817	0.276042	37	53	2.79109e-08	-0.815014	0.133648	2.17529e-09	0.000874179	4.09889e-06	CDK11A	C	G
1	1704540	1:1704540:G:C	ENSG00000008128	chr1:1721711:1722588:clu_22314_?:ENSG00000008128	-19817	0.276042	37	53	1.29941e-08	0.863037	0.137617	2.17529e-09	0.000874179	4.09889e-06	CDK11A	C	G
1	1704673	1:1704673:G:A	ENSG00000008128	chr1:1721711:1722708:clu_22314_?:ENSG00000008128	-19684	0.265625	37	51	9.20771e-08	-0.809191	0.138935	2.17529e-09	0.000874179	4.09889e-06	CDK11A	A	G
1	1704673	1:1704673:G:A	ENSG00000008128	chr1:1721711:1722588:clu_22314_?:ENSG00000008128	-19684	0.265625	37	51	7.22004e-08	0.846142	0.14389	2.17529e-09	0.000874179	4.09889e-06	CDK11A	A	G
1	1706141	1:1706141:C:T	ENSG00000008128	chr1:1721711:1722708:clu_22314_?:ENSG00000008128	-18216	0.270833	37	52	4.13205e-08	-0.818029	0.136142	2.17529e-09	0.000874179	4.09889e-06	CDK11A	T	C
1	1706141	1:1706141:C:T	ENSG00000008128	chr1:1721711:1722588:clu_22314_?:ENSG00000008128	-18216	0.270833	37	52	3.74106e-08	0.851766	0.141222	2.17529e-09	0.000874179	4.09889e-06	CDK11A	T	C
1	1706210	1:1706210:G:A	ENSG00000008128	chr1:1721711:1722708:clu_22314_?:ENSG00000008128	-18147	0.260417	35	50	1.07248e-08	-0.840507	0.133107	2.17529e-09	0.000874179	4.09889e-06	CDK11A	A	G
1	1706210	1:1706210:G:A	ENSG00000008128	chr1:1721711:1722588:clu_22314_?:ENSG00000008128	-18147	0.260417	35	50	4.82414e-09	0.88962	0.137005	2.17529e-09	0.000874179	4.09889e-06	CDK11A	A	G
1	1706488	1:1706488:C:G	ENSG00000008128	chr1:1721711:1722588:clu_22314_?:ENSG00000008128	-17869	0.270833	37	52	3.74106e-08	0.851766	0.141222	2.17529e-09	0.000874179	4.09889e-06	CDK11A	G	C
1	1706488	1:1706488:C:G	ENSG00000008128	chr1:1721711:1722708:clu_22314_?:ENSG00000008128	-17869	0.270833	37	52	4.13205e-08	-0.818029	0.136142	2.17529e-09	0.000874179	4.09889e-06	CDK11A	G	C
1	1706748	1:1706748:C:T	ENSG00000008128	chr1:1721711:1722588:clu_22314_?:ENSG00000008128	-17609	0.239583	33	46	6.30095e-07	0.793808	0.147778	2.17529e-09	0.000874179	4.09889e-06	CDK11A	T	C
1	1706748	1:1706748:C:T	ENSG00000008128	chr1:1721711:1722708:clu_22314_?:ENSG00000008128	-17609	0.239583	33	46	1.16555e-06	-0.748355	0.143271	2.17529e-09	0.000874179	4.09889e-06	CDK11A	T	C
1	1707090	1:1707090:A:G	ENSG00000008128	chr1:1721711:1722708:clu_22314_?:ENSG00000008128	-17267	0.291667	39	56	2.88435e-07	-0.780433	0.140432	2.17529e-09	0.000874179	4.09889e-06	CDK11A	G	A
1	1707090	1:1707090:A:G	ENSG00000008128	chr1:1721711:1722588:clu_22314_?:ENSG00000008128	-17267	0.291667	39	56	2.88679e-07	0.810428	0.145834	2.17529e-09	0.000874179	4.09889e-06	CDK11A	G	A
1	1707341	1:1707341:C:T	ENSG00000008128	chr1:1721711:1722708:clu_22314_?:ENSG00000008128	-17016	0.255208	36	49	5.0815e-07	-0.77735	0.143342	2.17529e-09	0.000874179	4.09889e-06	CDK11A	T	C
1	1707341	1:1707341:C:T	ENSG00000008128	chr1:1721711:1722588:clu_22314_?:ENSG00000008128	-17016	0.255208	36	49	3.67114e-07	0.815826	0.148323	2.17529e-09	0.000874179	4.09889e-06	CDK11A	T	C
1	1707486	1:1707486:C:T	ENSG00000008128	chr1:1721711:1722588:clu_22314_?:ENSG00000008128	-16871	0.239583	35	46	3.62786e-06	0.7667	0.155069	2.17529e-09	0.000874179	4.09889e-06	CDK11A	T	C
1	1707714	1:1707714:C:G	ENSG00000008128	chr1:1721711:1722708:clu_22314_?:ENSG00000008128	-16643	0.260417	37	50	5.78955e-07	-0.782902	0.1452	2.17529e-09	0.000874179	4.09889e-06	CDK11A	G	C
1	1707714	1:1707714:C:G	ENSG00000008128	chr1:1721711:1722588:clu_22314_?:ENSG00000008128	-16643	0.260417	37	50	2.38351e-07	0.83652	0.149317	2.17529e-09	0.000874179	4.09889e-06	CDK11A	G	C
1	1707716	1:1707716:T:C	ENSG00000008128	chr1:1721711:1722708:clu_22314_?:ENSG00000008128	-16641	0.260417	37	50	5.78955e-07	-0.782902	0.1452	2.17529e-09	0.000874179	4.09889e-06	CDK11A	C	T
1	1707716	1:1707716:T:C	ENSG00000008128	chr1:1721711:1722588:clu_22314_?:ENSG00000008128	-16641	0.260417	37	50	2.38351e-07	0.83652	0.149317	2.17529e-09	0.000874179	4.09889e-06	CDK11A	C	T
1	1707744	1:1707744:A:G	ENSG00000008128	chr1:1721711:1722588:clu_22314_?:ENSG00000008128	-16613	0.255208	36	49	3.12546e-07	0.821222	0.148277	2.17529e-09	0.000874179	4.09889e-06	CDK11A	G	A
1	1707744	1:1707744:A:G	ENSG00000008128	chr1:1721711:1722708:clu_22314_?:ENSG00000008128	-16613	0.255208	36	49	9.64391e-07	-0.761763	0.144569	2.17529e-09	0.000874179	4.09889e-06	CDK11A	G	A
1	1707801	1:1707801:C:G	ENSG00000008128	chr1:1721711:1722708:clu_22314_?:ENSG00000008128	-16556	0.265625	37	51	1.4726e-07	-0.798951	0.139796	2.17529e-09	0.000874179	4.09889e-06	CDK11A	G	C
1	1707801	1:1707801:C:G	ENSG00000008128	chr1:1721711:1722588:clu_22314_?:ENSG00000008128	-16556	0.265625	37	51	1.3185e-07	0.832402	0.144995	2.17529e-09	0.000874179	4.09889e-06	CDK11A	G	C
1	1708001	1:1708001:A:T	ENSG00000008128	chr1:1721711:1722588:clu_22314_?:ENSG00000008128	-16356	0.239583	34	46	2.32445e-06	0.801402	0.15855	2.17529e-09	0.000874179	4.09889e-06	CDK11A	T	A
1	1708051	1:1708051:G:C	ENSG00000008128	chr1:1721711:1722588:clu_22314_?:ENSG00000008128	-16306	0.229167	33	44	3.73997e-06	0.782011	0.158408	2.17529e-09	0.000874179	4.09889e-06	CDK11A	C	G
1	1708131	1:1708131:C:T	ENSG00000008128	chr1:1721711:1722588:clu_22314_?:ENSG00000008128	-16226	0.255208	37	49	3.04341e-07	0.845821	0.152545	2.17529e-09	0.000874179	4.09889e-06	CDK11A	T	C
1	1708131	1:1708131:C:T	ENSG00000008128	chr1:1721711:1722708:clu_22314_?:ENSG00000008128	-16226	0.255208	37	49	5.48704e-07	-0.799102	0.147853	2.17529e-09	0.000874179	4.09889e-06	CDK11A	T	C
1	1708248	1:1708248:G:A	ENSG00000008128	chr1:1721711:1722708:clu_22314_?:ENSG00000008128	-16109	0.255208	37	49	2.03227e-08	-0.879557	0.142548	2.17529e-09	0.000874179	4.09889e-06	CDK11A	A	G
1	1708248	1:1708248:G:A	ENSG00000008128	chr1:1721711:1722588:clu_22314_?:ENSG00000008128	-16109	0.255208	37	49	2.42725e-08	0.909209	0.148323	2.17529e-09	0.000874179	4.09889e-06	CDK11A	A	G
1	1708393	1:1708393:T:C	ENSG00000008128	chr1:1721711:1722588:clu_22314_?:ENSG00000008128	-15964	0.270833	37	52	1.61074e-08	0.873752	0.14041	2.17529e-09	0.000874179	4.09889e-06	CDK11A	C	T
1	1708393	1:1708393:T:C	ENSG00000008128	chr1:1721711:1722708:clu_22314_?:ENSG00000008128	-15964	0.270833	37	52	2.48704e-08	-0.832083	0.135863	2.17529e-09	0.000874179	4.09889e-06	CDK11A	C	T
1	1708474	1:1708474:C:A	ENSG00000008128	chr1:1721711:1722708:clu_22314_?:ENSG00000008128	-15883	0.328125	47	63	7.34588e-08	-0.758396	0.129056	2.17529e-09	0.000874179	4.09889e-06	CDK11A	A	C
1	1708474	1:1708474:C:A	ENSG00000008128	chr1:1721711:1722588:clu_22314_?:ENSG00000008128	-15883	0.328125	47	63	4.22854e-08	0.799668	0.133203	2.17529e-09	0.000874179	4.09889e-06	CDK11A	A	C
1	1708728	1:1708728:C:T	ENSG00000008128	chr1:1721711:1722588:clu_22314_?:ENSG00000008128	-15629	0.21875	37	42	2.40406e-06	0.934923	0.185271	2.17529e-09	0.000874179	4.09889e-06	CDK11A	T	C
1	1708737	1:1708737:G:C	ENSG00000008128	chr1:1721711:1722588:clu_22314_?:ENSG00000008128	-15620	0.21875	37	42	2.40406e-06	0.934923	0.185271	2.17529e-09	0.000874179	4.09889e-06	CDK11A	C	G
1	1708738	1:1708738:G:A	ENSG00000008128	chr1:1721711:1722588:clu_22314_?:ENSG00000008128	-15619	0.21875	37	42	2.40406e-06	0.934923	0.185271	2.17529e-09	0.000874179	4.09889e-06	CDK11A	A	G
1	1710588	1:1710588:C:T	ENSG00000008128	chr1:1721711:1722708:clu_22314_?:ENSG00000008128	-13769	0.744792	39	49	1.46079e-06	0.763222	0.14767	2.17529e-09	0.000874179	4.09889e-06	CDK11A	C	T
1	1710588	1:1710588:C:T	ENSG00000008128	chr1:1721711:1722588:clu_22314_?:ENSG00000008128	-13769	0.744792	39	49	2.03245e-06	-0.783016	0.153907	2.17529e-09	0.000874179	4.09889e-06	CDK11A	C	T
1	1714988	1:1714988:T:G	ENSG00000008128	chr1:1721711:1722588:clu_22314_?:ENSG00000008128	-9369	0.703125	40	57	2.1753e-09	-0.860104	0.12895	2.17529e-09	0.000874179	4.09889e-06	CDK11A	T	G
1	1714988	1:1714988:T:G	ENSG00000008128	chr1:1721711:1722708:clu_22314_?:ENSG00000008128	-9369	0.703125	40	57	7.39552e-09	0.805335	0.125875	2.17529e-09	0.000874179	4.09889e-06	CDK11A	T	G
1	1715011	1:1715011:G:A	ENSG00000008128	chr1:1721711:1722708:clu_22314_?:ENSG00000008128	-9346	0.703125	40	57	7.39552e-09	0.805335	0.125875	2.17529e-09	0.000874179	4.09889e-06	CDK11A	G	A
1	1715011	1:1715011:G:A	ENSG00000008128	chr1:1721711:1722588:clu_22314_?:ENSG00000008128	-9346	0.703125	40	57	2.1753e-09	-0.860104	0.12895	2.17529e-09	0.000874179	4.09889e-06	CDK11A	G	A
1	1715218	1:1715218:T:C	ENSG00000008128	chr1:1721711:1722708:clu_22314_?:ENSG00000008128	-9139	0.703125	40	57	7.39552e-09	0.805335	0.125875	2.17529e-09	0.000874179	4.09889e-06	CDK11A	T	C
1	1715218	1:1715218:T:C	ENSG00000008128	chr1:1721711:1722588:clu_22314_?:ENSG00000008128	-9139	0.703125	40	57	2.1753e-09	-0.860104	0.12895	2.17529e-09	0.000874179	4.09889e-06	CDK11A	T	C
1	1715350	1:1715350:T:C	ENSG00000008128	chr1:1721711:1722588:clu_22314_?:ENSG00000008128	-9007	0.71875	40	54	3.59442e-09	-0.888747	0.135505	2.17529e-09	0.000874179	4.09889e-06	CDK11A	T	C
1	1715350	1:1715350:T:C	ENSG00000008128	chr1:1721711:1722708:clu_22314_?:ENSG00000008128	-9007	0.71875	40	54	5.35379e-08	0.799921	0.134457	2.17529e-09	0.000874179	4.09889e-06	CDK11A	T	C
1	1715546	1:1715546:C:T	ENSG00000008128	chr1:1721711:1722588:clu_22314_?:ENSG00000008128	-8811	0.651042	49	67	1.26135e-07	-0.823103	0.143118	2.17529e-09	0.000874179	4.09889e-06	CDK11A	C	T
1	1715546	1:1715546:C:T	ENSG00000008128	chr1:1721711:1722708:clu_22314_?:ENSG00000008128	-8811	0.651042	49	67	1.03594e-06	0.740808	0.141055	2.17529e-09	0.000874179	4.09889e-06	CDK11A	C	T
1	1715860	1:1715860:C:T	ENSG00000008128	chr1:1721711:1722588:clu_22314_?:ENSG00000008128	-8497	0.703125	40	57	2.1753e-09	-0.860104	0.12895	2.17529e-09	0.000874179	4.09889e-06	CDK11A	C	T
[truncated: 42,948 more rows]
