# Supplementary material for: Causal splicing variants revealed by deep-learning integration of single-cell sQTL mapping under influenza infection
Source: Research Square preprint supplement (doi:10.21203/rs.3.rs-8408992/v1), 2026-01-06
Supplement: Supplementary file 2 [file 49bd78639b88631340ac108c.xlsx]

## Sheet: TableS2_differential_splice_gen
Term	Overlap	P.value	Adjusted.P.value	Odds.Ratio	Combined.Score	Genes
Myc Targets V1	66/200	2.18e-22	1.07e-20	5.33317	265.994	RPLP0;HNRNPU;HNRNPR;PWP1;RPL6;UBE2L3;RRP9;XPO1;RUVBL2;AP3S1;MRPL9;TXNL4A;RFC4;PABPC4;RPS5;CTPS1;GNL3;CCNA2;PSMA4;TFDP1;PSMA1;CLNS1A;CANX;SRSF2;SNRPG;NHP2;SRSF3;SNRPA1;MCM6;COX5A;SRM;PRDX3;PSMB3;USP1;RPL14;PGK1;SNRPB2;RPS2;BUB3;CCT7;HNRNPA1;CCT4;NOP56;NPM1;HNRNPA3;RRM1;NOP16;CBX3;PTGES3;NAP1L1;DEK;PSMC6;CDK4;APEX1;IMPDH2;HNRNPA2B1;SERBP1;EIF3J;HNRNPD;UBA2;RNPS1;HNRNPC;SSBP1;TARDBP;EIF4G2;RAN
Oxidative Phosphorylation	61/200	7.37e-19	1.8e-17	4.73638	197.754	COX7B;ACADVL;ECI1;MRPS11;COX4I1;ETFB;COX7C;MRPL35;CASP7;OPA1;IDH3B;ACADM;ATP6V1E1;IDH3A;ATP6V0E1;GPX4;NDUFC2;COX6B1;POR;NDUFS8;FDX1;NDUFS4;NDUFS1;ISCU;NDUFB8;ECHS1;NDUFB6;MGST3;TIMM9;NDUFB4;HTRA2;NDUFB1;COX7A2;MRPL15;UQCR10;MRPS30;COX5A;HSD17B10;UQCRH;PRDX3;ATP5F1B;MFN2;POLR2F;NDUFV2;ATP5MF;DECR1;ATP5ME;TIMM8B;NDUFA8;NDUFA7;ATP5PD;NDUFA5;ATP5PB;IDH3G;NDUFA3;NDUFA2;ATP5F1C;GLUD1;UQCRQ;ATP5PO;CYCS
G2-M Checkpoint	51/200	1.36e-12	1.67e-11	3.67026	100.283	HNRNPU;ARID4A;MKI67;SMC4;XPO1;PBK;NUSAP1;MYBL2;KMT5A;HMGN2;TMPO;SLC38A1;ATRX;KIF23;SMC1A;SAP30;CCNA2;ILF3;SFPQ;DBF4;TFDP1;RBL1;NUP50;MTF2;SRSF2;BIRC5;KIF2C;MCM6;PAFAH1B1;CUL5;TROAP;HMMR;AURKA;WRN;ORC6;KATNA1;BUB3;SRSF10;BARD1;UBE2C;TPX2;CENPE;STAG1;NASP;UBE2S;CDK4;PRC1;HNRNPD;CDK1;EZH2;CDKN3
E2F Targets	51/200	1.36e-12	1.67e-11	3.67026	100.283	TFRC;PSIP1;SMC6;BRCA1;MKI67;SMC4;XPO1;MYBL2;NBN;TMPO;HELLS;TIPIN;RFC3;RFC1;CTPS1;SMC1A;ILF3;RAD51C;SRSF2;BIRC5;KIF2C;MCM6;SNRPB;SLBP;PRPS1;PRKDC;HMMR;AURKA;ORC6;EXOSC8;USP1;LYAR;BARD1;GINS1;NOP56;NAP1L1;DEK;MLH1;PAICS;POLE4;CENPE;STAG1;NASP;UBE2S;CDK4;ANP32E;HNRNPD;CDK1;RAN;EZH2;CDKN3
DNA Repair	36/150	1.49e-08	1.46e-07	3.36286	60.5946	GTF2A2;RNMT;PRIM1;POLB;DGUOK;GUK1;MPC2;POLR2F;POLR2H;POLR2I;SF3A3;RFC3;RFC4;GPX4;POLR3GL;TAF13;TAF10;ADRM1;UPF3B;GTF2F1;GTF2H3;RBX1;DDB2;APRT;NT5C3A;DDB1;POLE4;NUDT9;DAD1;ERCC1;IMPDH2;BOLA2;POLR1C;POLR1D;UMPS;ADA
Interferon Gamma Response	43/200	2.13e-08	1.74e-07	2.92171	51.6154	SAMD9L;SPPL2A;TNFAIP2;ADAR;IFI35;IFI44L;IFIH1;CASP7;RNF213;CASP3;NAMPT;CASP4;TNFSF10;EPSTI1;CASP1;TRIM25;SLAMF7;IFNAR2;CD74;PTPN1;PNPT1;SP110;STAT1;NCOA3;STAT2;MX2;MX1;EIF2AK2;IFI44;TAP1;NFKB1;PSMB9;NUP93;VAMP8;ISG20;NFKBIA;PLSCR1;IRF4;IRF1;PSME2;FAS;IRF9;PTPN2
Interferon Alpha Response	25/97	5.51e-07	3.86e-06	3.68238	53.0672	SAMD9L;ADAR;IFI35;IFI44L;IFIH1;NUB1;EPSTI1;CASP1;TRIM25;CD74;PNPT1;SP110;STAT2;MX1;TAP1;IFI44;EIF2AK2;PSMB9;ISG20;PLSCR1;IRF1;PSME2;NCOA7;CD47;IRF9
Protein Secretion	23/96	5.94e-06	3.64e-05	3.3373	40.1625	RAB2A;COPB2;STX12;SGMS1;COPB1;BNIP3;CLTC;STX7;GBF1;COG2;CLTA;CLCN3;NAPG;LAMP2;AP2S1;ANP32E;AP3S1;YKT6;GLA;AP2M1;CTSC;COPE;SEC31A
Mitotic Spindle	36/199	1.93e-05	0.000104924	2.34559	25.4658	CEP57;TUBGCP2;SMC4;AURKA;UXT;CDC42;PCM1;CAPZB;KATNA1;CNTRL;NUSAP1;STK38L;TLK1;CDK5RAP2;NCK1;RALBP1;RFC1;CSNK1D;KIF23;HOOK3;SMC1A;DYNLL2;TPX2;CENPE;DLG1;NIN;APC;PRC1;SASS6;TUBGCP5;CDK1;BIRC5;KIF2C;MAPRE1;ARHGEF7;PAFAH1B1
Myc Targets V2	16/58	2.36e-05	0.000115678	4.02563	42.8888	NOP56;NPM1;NOP16;CBX3;NOP2;WDR74;IMP4;WDR43;RRP9;GNL3;SRM;TCOF1;LAS1L;CDK4;MRTO4;MPHOSPH10
Unfolded Protein Response	23/113	9.51e-05	0.000423709	2.70439	25.0437	NOP56;NOP14;NPM1;FUS;DCTN1;DDX10;SDAD1;PDIA6;YIF1A;RRP9;SERP1;PSAT1;CNOT2;NHP2;NABP1;BANF1;HYOU1;ATF6;SEC11A;DCP2;EXOSC1;SEC31A;EIF4G1
Adipogenesis	32/200	0.000556468	0.00209746	2.01762	15.1198	RTN3;COX7B;ECHS1;MGST3;MRPL15;UQCR10;ETFB;PRDX3;SCP2;G3BP2;ACADM;DRAM2;HIBCH;DECR1;IDH3A;PTCD3;GPX4;NDUFA5;IDH3G;CHCHD10;DNAJC15;PEX14;POR;DHRS7;REEP5;UQCRQ;ATP5PO;CMPK1;PDCD4;NABP1;PLIN2;MGLL
mTORC1 Signaling	32/200	0.000556468	0.00209746	2.01762	15.1198	IDI1;GSK3B;TES;TFRC;RRP9;AURKA;GGA2;SERP1;NAMPT;PGK1;PHGDH;ABCF2;YKT6;SEC11A;CTSC;PSPH;PNO1;TXNRD1;CACYBP;ACSL3;DHFR;CCT6A;UFM1;PSMA4;PSMC6;PPA1;PSAT1;CANX;CCNG1;TCEA1;POLR3G;GLA
Fatty Acid Metabolism	26/158	0.00115718	0.00405014	2.08324	14.0864	IDI1;ACADVL;ECHS1;ECI1;ECI2;CPOX;HSD17B10;CRYZ;LGALS1;HSPH1;UROD;IDH3B;PCBD1;NBN;KMT5A;ACADM;HIBCH;DECR1;HSDL2;ADSL;IDH3G;CCDC58;GRHPR;APEX1;MGLL;BLVRA
PI3K/AKT/mTOR Signaling	19/105	0.00166581	0.00544163	2.33305	14.9256	ATF1;GSK3B;RALB;PRKCB;YWHAB;MAPKAP1;STAT2;CLTC;PTEN;ITPR2;PTPN11;CDK4;PRKAR2A;UBE2N;CDK1;GRB2;RAC1;AP2M1;NCK1
Androgen Response	17/100	0.00552196	0.016911	2.16077	11.2339	SRP19;IDI1;RAB4A;TNFAIP8;UBE2I;B4GALT1;TMEM50A;NCOA4;ADRM1;DBI;ACSL3;IQGAP2;UBE2J1;VAPA;PGM3;CENPN;FKBP5
heme Metabolism	28/200	0.00821821	0.0236878	1.71995	8.25818	TFRC;MGST3;DCUN1D1;CPOX;HTRA2;MOSPD1;NR3C1;CLCN3;BACH1;ADD1;UROD;RNF19A;LAMP2;CIR1;PGLS;BTRC;MARK3;CDR2;FBXO9;ATP6V0A1;CAST;EIF2AK1;NCOA4;TFDP2;TCEA1;OPTN;BLVRA;TNRC6B
Allograft Rejection	27/200	0.0146978	0.0400106	1.64788	6.95417	WAS;LY75;UBE2D1;MTIF2;BRCA1;CTSS;MRPL3;HLA-DMB;CCND2;CCL4;RPL39;NCK1;MAP4K1;IFNAR2;CD74;NPM1;RPS9;PRKCB;STAT1;GLMN;TAP1;IRF4;EIF3J;UBE2N;FAS;CD47;EIF4G3
IL-6/JAK/STAT3 Signaling	13/87	0.0374402	0.0965563	1.84994	6.07706	PTPN1;ITGA4;STAT1;STAT2;PTPN11;IRF1;FAS;MAP3K8;GRB2;IRF9;PTPN2;IL18R1;IFNAR1
Apoptosis	21/161	0.0398873	0.0977239	1.58115	5.09399	CREBBP;DFFA;GPX4;TAP1;XIAP;BRCA1;ADD1;ISG20;CYLD;CASP7;PAK1;CCND2;CASP3;IRF1;CASP4;TNFSF10;CASP1;PDCD4;FAS;DAP3;BIRC3
Reactive Oxygen Species Pathway	1949-01-01	0.0592656	0.138286	2.0525	5.7998	PDLIM1;GPX4;NDUFB4;TXNRD1;LSP1;OXSR1;HMOX2;ATOX1
IL-2/STAT5 Signaling	24/199	0.0638317	0.142171	1.44535	3.9769	PHTF2;RABGAP1L;GUCY1B1;GPX4;GSTO1;NCOA3;SWAP70;CTSZ;NOP2;HUWE1;PDCD2L;COCH;PLSCR1;CCND2;IRF4;CASP3;RRAGD;TNFSF10;BCL2;CD48;PLIN2;MAP3K8;UMPS;IL18R1
Spermatogenesis	16/135	0.12684	0.270224	1.41481	2.92133	RFC4;PARP2;STRBP;SIRT1;TSN;AURKA;MLLT10;DBF4;PRKAR2A;CDK1;RAD17;KIF2C;TOPBP1;ZC3H14;EZH2;CDKN3
Complement	21/200	0.213187	0.417847	1.23399	1.90724	APOBEC3G;GCA;WAS;RNF4;CTSS;ATOX1;PSMB9;DOCK10;PLSCR1;CASP7;ZEB1;KIF2A;CASP3;IRF1;FDX1;LAMP2;CASP4;APOC1;CASP1;GRB2;CTSC
Glycolysis	21/200	0.213187	0.417847	1.23399	1.90724	COPB2;PRPS1;B4GALT1;PMM2;COG2;AKR1A1;HMMR;ARPP19;SAP30;AURKA;ISG20;FUT8;UGP2;KIF2A;NASP;RRAGD;PGK1;CDK1;NDUFV3;PGLS;SLC25A13
Pperoxisome	11/104	0.294015	0.554106	1.24279	1.52133	IDI1;PRDX5;ABCD3;SCP2;SLC25A19;ERCC1;ECI2;PEX2;CTPS1;ITGB1BP1;PEX14
TGF-beta Signaling	1954-06-01	0.328545	0.596249	1.31286	1.46132	PPM1A;APC;XIAP;ARID4B;RHOA;TRIM33
TNF-alpha Signaling via NF-kB	19/200	0.378795	0.662892	1.10273	1.07048	NFAT5;TNFAIP8;B4GALT1;TNFAIP2;TAP1;NFKB1;PNRC1;IFIH1;NFKBIA;PTPRE;DRAM1;TNIP1;GPR183;IRF1;NAMPT;CCL4;MAP3K8;BIRC2;BIRC3
UV Response Up	15/158	0.401186	0.677866	1.10167	1.00619	RFC4;TFRC;PARP2;HNRNPU;TAP1;NFKBIA;PPP1R2;EIF5;UROD;PPAT;CASP3;IRF1;AP2S1;POLR2H;YKT6
p53 Pathway	18/200	0.476307	0.777967	1.03829	0.770092	PRMT2;TPRKB;WWP1;TAP1;RRP8;DDB2;VAMP8;PTPRE;RAD51C;CCND2;DRAM1;CCNG1;RPL36;KIF13B;CASP1;FAS;ADA;ISCU
Notch Signaling	1932-03-01	0.535423	0.846314	1.08576	0.678272	FBXW11;SAP30;RBX1
Bile Acid Metabolism	9/112	0.64765	0.991713	0.916542	0.398151	PEX16;IDI1;PRDX5;ABCD3;SCP2;ABCA6;PNPLA8;CROT;OPTN
KRAS Signaling Up	16/200	0.67443	0.99998	0.911732	0.35912	MAP4K1;ST6GAL1;RABGAP1L;USP12;LAPTM5;LY96;IKZF1;CROT;CTSS;NIN;CCND2;CCSER2;CD37;CBR4;SDCCAG8;BIRC3
UV Response Dn	11/144	0.717452	0.99998	0.867106	0.287922	DMAC2L;PHF3;DLG1;ATRX;PTEN;MRPS31;PRDM2;NR3C1;NFKB1;MGLL;PEX14
Wnt-beta Catenin Signaling	1942-03-01	0.719962	0.99998	0.806917	0.265118	CCND2;NUMB;RBPJ
Inflammatory Response	15/200	0.762783	0.99998	0.849589	0.230053	ADRM1;EIF2AK2;CYBB;EMP3;NFKB1;NFKBIA;PTPRE;GPR183;IRF1;NAMPT;TNFSF10;CD48;IL18R1;SLAMF1;IFNAR1
Hypoxia	14/200	0.8374	0.99998	0.788186	0.139866	TES;RBPJ;NR3C1;PNRC1;SAP30;PLAC8;ISG20;GRHPR;PRDX5;UGP2;RRAGD;PGK1;BCL2;PLIN2
Xenobiotic Metabolism	14/200	0.8374	0.99998	0.788186	0.139866	GSTO1;SLC35B1;GSS;PTGES3;DHPS;IGF1;CROT;ARPP19;POR;PGRMC1;DHRS7;MTHFD1;FAS;GART
Cholesterol Homeostasis	1974-04-01	0.895091	0.99998	0.598749	0.0663592	IDI1;PLSCR1;ETHE1;PNRC1
Estrogen Response Late	13/200	0.895864	0.99998	0.727511	0.0800023	MOCS2;ETFB;ISG20;DNAJC1;RABEP1;MYB;BAG1;BCL2;RBBP8;PDCD4;CHPT1;GLA;FKBP5
Apical Surface	1944-02-01	0.905597	0.99998	0.499151	0.0494965	B4GALT1;BRCA1
Angiogenesis	1936-01-01	0.962359	0.99998	0.299433	0.0114886	CCND2
Pancreas Beta Cells	1940-01-01	0.973864	0.99998	0.268663	0.00711529	SEC11A
Coagulation	6/138	0.983751	0.99998	0.475202	0.00778509	MMP7;LAMP2;APOC1;MSRB2;RAC1;ISCU
Estrogen Response Early	8/200	0.996985	0.99998	0.434661	0.00131254	B4GALT1;MYB;BAG1;BCL2;RBBP8;CHPT1;GLA;FKBP5
Myogenesis	8/200	0.996985	0.99998	0.434661	0.00131254	MEF2A;ITGB1;GABARAPL2;MEF2C;BAG1;IGF1;LSP1;CNN3
Apical Junction	8/200	0.996985	0.99998	0.434661	0.00131254	TIAL1;ITGB1;DLG1;B4GALT1;RAC2;PTEN;GTF2F1;MPZL1
Epithelial Mesenchymal Transition	6/200	0.999682	0.99998	0.322227	0.000102566	IL32;ITGB1;LGALS1;WIPF1;FAS;EMP3
KRAS Signaling Dn	4/200	0.99998	0.99998	0.212358	4.14e-06	BARD1;MX1;SIDT1;IFI44L
