# Supplementary material for: Causal splicing variants revealed by deep-learning integration of single-cell sQTL mapping under influenza infection
Source: Research Square preprint supplement (doi:10.21203/rs.3.rs-8408992/v1), 2026-01-06
Supplement: Supplementary file 3 [file 911492a4705db943ffd0e185.xlsx]

## Sheet: Schihost_AI76sQTL_iCPAGdb
Trait1	Trait2	Trait2_cleanName	N1_pcut	N2_pcut	Nshare_direct	Nshare_LDpairComb	Nshare_all	N_expected	P_fisher	Padj_FDR	Padj_Bonferroni	Jaccard	Sorensen	ChaoSorensen	SNPshare_all	Trait2_EFO	Trait2_ParentTerm	Trait2_ParentTermLWmanual	Trait2_raw	Trait2_ParentEFO
User_trait	blood protein measurement	blood protein measurement	59	1785	0	9	9	0.0644168	2.59e-17	7.87e-14	7.87e-14	0.00490463	0.00976139	0.0272034	rs3819946-rs745108|rs11983987-rs8565|rs62114506-rs79716074|rs34005367-rs1042779|rs2524143-rs3130463|rs9271762-rs200930495-rs3667|rs2072696-rs67573812|rs4767027-rs10774671|rs113216780-rs4794975	http://www.ebi.ac.uk/efo/EFO_0007937	Other measurement	Other measurement	blood protein measurement	http://www.ebi.ac.uk/efo/EFO_0001444
User_trait	high density lipoprotein cholesterol measurement	HDL	59	861	0	6	6	0.0310716	9.22e-13	1.4e-09	2.81e-09	0.00656455	0.0130435	0.0264569	rs62114506-rs11553746|rs28366301-rs3667|rs7109106-rs16928809|rs3767964-rs10874777|rs296887-rs28712486|rs6446205-rs6808104	http://www.ebi.ac.uk/efo/EFO_0004612	Lipid or lipoprotein measurement	Lipid/lipoprotein measurement	high density lipoprotein cholesterol measurement	http://www.ebi.ac.uk/efo/EFO_0004732
User_trait	hepatitis B virus infection	Hepatitis B virus	59	9	0	3	3	0.000324791	3.75e-12	3.81e-09	1.14e-08	0.0461538	0.0882353	0.115729	rs3130463-rs3130542|rs1126506-rs9277535|rs72867689-rs3077	http://www.ebi.ac.uk/efo/EFO_0004197	Digestive system disorder	Infectious	hepatitis B virus infection	http://www.ebi.ac.uk/efo/EFO_0000405
User_trait	body fat distribution	body fat distribution	59	104	0	4	4	0.00375313	7.01e-12	5.34e-09	2.13e-08	0.0251572	0.0490798	0.0786528	rs6446205-rs4521268|rs7039458-rs296887|rs565817433-rs34005367|rs12426511-rs3825078	http://www.ebi.ac.uk/efo/EFO_0004341	Body measurement	Body measurement	body fat distribution	http://www.ebi.ac.uk/efo/EFO_0004324
User_trait	response to vaccine	Vaccine response	59	20	1	2	3	0.000721757	5.09e-11	3.1e-08	1.55e-07	0.0394737	0.0759494	0.101999	rs477515-rs3667|rs1333973|rs1126506-rs9277535	http://www.ebi.ac.uk/efo/EFO_0004645	Response to drug	Infectious	response to vaccine	http://purl.obolibrary.org/obo/GO_0042493
User_trait	body height	body height	59	2984	0	6	6	0.107686	1.53e-09	7.74e-07	4.65e-06	0.00197563	0.00394348	0.00784972	rs6457374-rs3130463|rs62114506-rs55753056|rs1133415-rs34005367|rs77750939-rs17638853|rs1063588-rs6546917|rs796004-rs296887	http://www.ebi.ac.uk/efo/EFO_0004339	Body measurement	Body measurement	body height	http://www.ebi.ac.uk/efo/EFO_0004324
User_trait	ulcerative colitis	Ulcerative Colitis	59	130	0	3	3	0.00469142	1.59e-08	6.92e-06	4.85e-05	0.016129	0.031746	0.0409592	rs3204853-rs28374715|rs6927022-rs3667|rs8373-rs11229555	http://www.ebi.ac.uk/efo/EFO_0000729	Immune system disorder	Immune disorder	ulcerative colitis	http://www.ebi.ac.uk/efo/EFO_0000540
User_trait	chronic hepatitis B virus infection	Chronic Hepatitis B Virus	59	10	0	2	2	0.000360878	5.76e-08	2.19e-05	0.000175395	0.0298507	0.057971	0.058659	rs1126506-rs9277535|rs72867689-rs3077	http://www.ebi.ac.uk/efo/EFO_0004239	Digestive system disorder	Infectious	chronic hepatitis B virus infection	http://www.ebi.ac.uk/efo/EFO_0000405
User_trait	anti-neutrophil antibody associated vasculitis	ANCA-associated vasculitis	59	16	0	2	2	0.000577405	1.54e-07	5.2e-05	0.000467654	0.0273973	0.0533333	0.0547645	rs3117242-rs1126506|rs72867689-rs9277341	http://www.ebi.ac.uk/efo/EFO_0004826	Immune system disorder	Immune disorder	anti-neutrophil antibody associated vasculitis	http://www.ebi.ac.uk/efo/EFO_0000540
User_trait	hemoglobin measurement	Hemoglobin measurement	59	374	0	3	3	0.0134968	3.82e-07	0.00011644	0.0011644	0.00697674	0.0138568	0.0174647	rs2596493-rs3130463|rs10266424-rs2188155|rs66782572-rs34005367	http://www.ebi.ac.uk/efo/EFO_0004509	Hematological measurement	Hematological	hemoglobin measurement	http://www.ebi.ac.uk/efo/EFO_0004503
User_trait	osteoarthritis, hip, osteoarthritis, knee	osteoarthritis, hip, osteoarthritis, knee	59	27	0	2	2	0.000974372	4.49e-07	0.000124322	0.00136754	0.0238095	0.0465116	0.0479939	rs34005367-rs3774354|rs9277552-rs1126506	http://www.ebi.ac.uk/efo/EFO_1000786, http://www.ebi.ac.uk/efo/EFO_0004616	Other disease	Immune disorder	osteoarthritis, hip, osteoarthritis, knee	http://www.ebi.ac.uk/efo/EFO_0000408
User_trait	osteoarthritis	Osteoarthritis	59	39	0	2	2	0.00140743	9.48e-07	0.000232181	0.00288622	0.0208333	0.0408163	0.0420612	rs11177-rs34005367|rs2856821-rs1126506	http://www.ebi.ac.uk/efo/EFO_0002506	Other disease	Immune disorder	osteoarthritis	http://www.ebi.ac.uk/efo/EFO_0000408
User_trait	risk-taking behaviour	risk-taking behaviour	59	514	0	3	3	0.0185491	9.91e-07	0.000232181	0.00301835	0.00526316	0.0104712	0.0131383	rs13271691-rs2469768|rs62114506-rs60843830|rs4687552-rs34005367	http://www.ebi.ac.uk/efo/EFO_0008579	Biological process	Biological process	risk-taking behaviour	http://purl.obolibrary.org/obo/GO_0008150
User_trait	low density lipoprotein cholesterol measurement	LDL	59	593	0	3	3	0.0214001	1.52e-06	0.000330654	0.00462916	0.0046225	0.00920245	0.0115269	rs5758128-rs103197|rs3130463-rs2247056|rs2302429-rs8565	http://www.ebi.ac.uk/efo/EFO_0004611	Lipid or lipoprotein measurement	Lipid/lipoprotein measurement	low density lipoprotein cholesterol measurement	http://www.ebi.ac.uk/efo/EFO_0004732
User_trait	triglyceride measurement	Triglyceride measurement	59	746	0	3	3	0.0269215	3.02e-06	0.000612645	0.00918968	0.00374065	0.00745342	0.00931432	rs696825-rs296887|rs2114273-rs3767964|rs3130463-rs2247056	http://www.ebi.ac.uk/efo/EFO_0004530	Lipid or lipoprotein measurement	Lipid/lipoprotein measurement	triglyceride measurement	http://www.ebi.ac.uk/efo/EFO_0004529
User_trait	eosinophil count	Eosinophil count	59	791	0	3	3	0.0285455	3.59e-06	0.00065243	0.0109449	0.00354191	0.00705882	0.00881656	rs295268-rs296887|rs3767964-rs2281525|rs757040-rs2188155	http://www.ebi.ac.uk/efo/EFO_0004842	Hematological measurement	Hematological	eosinophil count	http://www.ebi.ac.uk/efo/EFO_0004503
User_trait	BMI-adjusted waist circumference, physical activity measurement	BMI-adjusted waist circumference, physical activity measurement	59	76	0	2	2	0.00274267	3.64e-06	0.00065243	0.0110913	0.0150376	0.0296296	0.0302938	rs615672-rs9269964|rs13083798-rs34005367	http://www.ebi.ac.uk/efo/EFO_0007789, http://www.ebi.ac.uk/efo/EFO_0008002	Body measurement,Other measurement	Body measurement	BMI-adjusted waist circumference, physical activity measurement	http://www.ebi.ac.uk/efo/EFO_0001444,http://www.ebi.ac.uk/efo/EFO_0004324
User_trait	erythrocyte count	Erythrocyte count	59	937	0	3	3	0.0338143	5.96e-06	0.00100753	0.0181355	0.00302115	0.0060241	0.00751379	rs34005367-rs2577831|rs12740-rs2188155|rs3767964-rs12133576	http://www.ebi.ac.uk/efo/EFO_0004305	Hematological measurement	Hematological	erythrocyte count	http://www.ebi.ac.uk/efo/EFO_0004503
User_trait	urinary albumin to creatinine ratio	urinary albumin to creatinine ratio	59	102	0	2	2	0.00368096	6.58e-06	0.00105442	0.020034	0.0125786	0.0248447	0.0252905	rs8565-rs1057868|rs34005367-rs1010553	http://www.ebi.ac.uk/efo/EFO_0007778	Other measurement	Other measurement	urinary albumin to creatinine ratio	http://www.ebi.ac.uk/efo/EFO_0001444
User_trait	BMI-adjusted waist circumference	BMI-adjusted waist circumference	59	1266	0	3	3	0.0456872	1.46e-05	0.00221962	0.0443924	0.00226929	0.0045283	0.00563683	rs7612511-rs34005367|rs6446205-rs9865051|rs62114506-rs6710091	http://www.ebi.ac.uk/efo/EFO_0007789	Body measurement	Body measurement	BMI-adjusted waist circumference	http://www.ebi.ac.uk/efo/EFO_0004324
User_trait	neutrophil percentage of granulocytes	neutrophil percentage of granulocytes	59	170	0	2	2	0.00613493	1.83e-05	0.00265629	0.0557822	0.00881057	0.0174672	0.0176501	rs7047907-rs296887|rs3767964-rs35797862	http://www.ebi.ac.uk/efo/EFO_0007994	Hematological measurement	Hematological	neutrophil percentage of granulocytes	http://www.ebi.ac.uk/efo/EFO_0004503
User_trait	eosinophil percentage of granulocytes	Eosinophil % of granulocytes	59	184	0	2	2	0.00664016	2.15e-05	0.00284158	0.0653563	0.00829875	0.0164609	0.0166159	rs7047907-rs296887|rs3767964-rs35797862	http://www.ebi.ac.uk/efo/EFO_0007996	Hematological measurement	Hematological	eosinophil percentage of granulocytes	http://www.ebi.ac.uk/efo/EFO_0004503
User_trait	Agents acting on the renin-angiotensin system use measurement	Agents acting on the renin-angiotensin system use measurement	59	184	0	2	2	0.00664016	2.15e-05	0.00284158	0.0653563	0.00829875	0.0164609	0.0166159	rs1757463-rs3204853|rs8373-rs11229555	http://www.ebi.ac.uk/efo/EFO_0009931	Other measurement	Other measurement	Agents acting on the renin-angiotensin system use measurement	http://www.ebi.ac.uk/efo/EFO_0001444
User_trait	atopic asthma	atopic asthma	59	197	0	2	2	0.0071093	2.46e-05	0.00302739	0.074922	0.00787402	0.015625	0.0157583	rs35449774-rs72867689|rs3204853-rs12440111	http://www.ebi.ac.uk/efo/EFO_0010638	Other disease	Lung disease	atopic asthma	http://www.ebi.ac.uk/efo/EFO_0000408
User_trait	eosinophil percentage of leukocytes	Eosinophil percentage of leukocytes	59	198	0	2	2	0.00714539	2.49e-05	0.00302739	0.0756848	0.00784314	0.0155642	0.015696	rs296887-rs371212078|rs797680-rs3767964	http://www.ebi.ac.uk/efo/EFO_0007991	Hematological measurement	Hematological	eosinophil percentage of leukocytes	http://www.ebi.ac.uk/efo/EFO_0004503
User_trait	basophil count, eosinophil count	basophil count, eosinophil count	59	206	0	2	2	0.00743409	2.69e-05	0.00315097	0.0819252	0.00760456	0.0150943	0.0152147	rs6446205-rs11353326|rs797680-rs3767964	http://www.ebi.ac.uk/efo/EFO_0005090, http://www.ebi.ac.uk/efo/EFO_0004842	Hematological measurement,Inflammatory measurement	Hematological	basophil count, eosinophil count	http://www.ebi.ac.uk/efo/EFO_0004503,http://www.ebi.ac.uk/efo/EFO_0004872
User_trait	inflammatory bowel disease	Inflammatory Bowel Disease	59	215	0	2	2	0.00775888	2.93e-05	0.00323198	0.0892397	0.00735294	0.0145985	0.0147072	rs8373-rs11229555|rs477515-rs6927022-rs3667	http://www.ebi.ac.uk/efo/EFO_0003767	Digestive system disorder	Inflammatory	inflammatory bowel disease	http://www.ebi.ac.uk/efo/EFO_0000405
User_trait	mood disorder	Mood disorder	59	1	0	1	1	3.61e-05	3.61e-05	0.00323198	0.109887	0.0169492	0.0333333	0.0169492	rs34005367-rs2251219	http://www.ebi.ac.uk/efo/EFO_0004247	Neurological disorder	Neurological disorder	mood disorder	http://www.ebi.ac.uk/efo/EFO_0000618
User_trait	CD4:CD8 lymphocyte ratio	CD4:CD8 T cell ratio	59	1	0	1	1	3.61e-05	3.61e-05	0.00323198	0.109887	0.0169492	0.0333333	0.0169492	rs3130463-rs2524054	http://www.ebi.ac.uk/efo/EFO_0004839	Inflammatory measurement	Inflammatory	CD4:CD8 lymphocyte ratio	http://www.ebi.ac.uk/efo/EFO_0004872
User_trait	CD8-positive T-lymphocyte count	CD8-positive T-lymphocyte count	59	1	0	1	1	3.61e-05	3.61e-05	0.00323198	0.109887	0.0169492	0.0333333	0.0169492	rs3130463-rs2524054	http://www.ebi.ac.uk/efo/EFO_0010107	Hematological measurement	Hematological	CD8-positive T-lymphocyte count	http://www.ebi.ac.uk/efo/EFO_0004503
User_trait	multiple sclerosis, response to interferon beta, anti-drug antibody measurement	Multiple sclerosis	59	1	0	1	1	3.61e-05	3.61e-05	0.00323198	0.109887	0.0169492	0.0333333	0.0169492	rs2454138-rs3667	http://www.ebi.ac.uk/efo/EFO_0003885, http://purl.obolibrary.org/obo/GO_0035456, http://www.ebi.ac.uk/efo/EFO_0010559	Response to drug,Immune system disorder,Other measurement	Immune disorder	multiple sclerosis, response to interferon beta, anti-drug antibody measurement	http://purl.obolibrary.org/obo/GO_0042493,http://www.ebi.ac.uk/efo/EFO_0001444,http://www.ebi.ac.uk/efo/EFO_0000540
User_trait	birth weight	birth weight	59	234	0	2	2	0.00844455	3.47e-05	0.00323198	0.105703	0.00687285	0.0136519	0.0137397	rs8373-rs12802960|rs3810232-rs255773	http://www.ebi.ac.uk/efo/EFO_0004344	Body measurement	Body measurement	birth weight	http://www.ebi.ac.uk/efo/EFO_0004324
User_trait	granzyme A measurement	granzyme A measurement	59	1	0	1	1	3.61e-05	3.61e-05	0.00323198	0.109887	0.0169492	0.0333333	0.0169492	rs2853928-rs3130463	http://www.ebi.ac.uk/efo/EFO_0008145	Other measurement	Other measurement	granzyme A measurement	http://www.ebi.ac.uk/efo/EFO_0001444
User_trait	Stress urinary incontinence	Stress urinary incontinence	59	1	0	1	1	3.61e-05	3.61e-05	0.00323198	0.109887	0.0169492	0.0333333	0.0169492	rs1063588-rs7607995	http://purl.obolibrary.org/obo/HP_0010992	Other trait	Other trait	Stress urinary incontinence	http://www.ebi.ac.uk/efo/EFO_0000001
User_trait	urate measurement	urate measurement	59	253	0	2	2	0.00913022	4.06e-05	0.00353001	0.12355	0.00645161	0.0128205	0.0128916	rs9271585-rs3667|rs7417952-rs3767964	http://www.ebi.ac.uk/efo/EFO_0004531	Other measurement	Other measurement	urate measurement	http://www.ebi.ac.uk/efo/EFO_0001444
User_trait	schizophrenia, autism spectrum disorder	Schizophrenia/Autism disorder	59	283	0	2	2	0.0102129	5.08e-05	0.00429292	0.154545	0.00588235	0.0116959	0.0117466	rs34005367-rs3617|rs9269964-rs9270074	http://www.ebi.ac.uk/efo/EFO_0000692, http://www.ebi.ac.uk/efo/EFO_0003756	Neurological disorder	Neurological disorder	schizophrenia, autism spectrum disorder	http://www.ebi.ac.uk/efo/EFO_0000618
User_trait	insomnia measurement	insomnia measurement	59	313	0	2	2	0.0112955	6.21e-05	0.00510757	0.18898	0.00540541	0.0107527	0.0107884	rs7730051-rs7711696|rs6446205-rs10865954	http://www.ebi.ac.uk/efo/EFO_0007876	Other measurement	Other measurement	insomnia measurement	http://www.ebi.ac.uk/efo/EFO_0001444
User_trait	antibody measurement, Epstein-Barr virus infection	Epstein-Barr Virus antibody	59	2	0	1	1	7.22e-05	7.22e-05	0.00523264	0.219771	0.0166667	0.0327869	0.0210345	rs477515-rs3667	http://www.ebi.ac.uk/efo/EFO_0004556, http://www.ebi.ac.uk/efo/EFO_0000769	Other disease,Other measurement	Infectious	antibody measurement, Epstein-Barr virus infection	http://www.ebi.ac.uk/efo/EFO_0001444,http://www.ebi.ac.uk/efo/EFO_0000408
User_trait	Granulomatosis with Polyangiitis	Granulomatosis with Polyangiitis	59	2	0	1	1	7.22e-05	7.22e-05	0.00523264	0.219771	0.0166667	0.0327869	0.0210345	rs1126506-rs9277554	http://www.ebi.ac.uk/efo/EFO_0005297	Cardiovascular disease	Cardiovascular	Granulomatosis with Polyangiitis	http://www.ebi.ac.uk/efo/EFO_0000319
User_trait	body mass index	body mass index	59	2122	0	3	3	0.0765784	6.72e-05	0.00523264	0.204705	0.00137741	0.00275103	0.00341636	rs4302256-rs4581940|rs62114506-rs17713729|rs2240920-rs34005367	http://www.ebi.ac.uk/efo/EFO_0004340	Body measurement	Body measurement	body mass index	http://www.ebi.ac.uk/efo/EFO_0004324
User_trait	Febrile seizure (within the age range of 3 months to 6 years), MMR-related febrile seizures	Febrile seizure (within the age range of 3 months to 6 years), MMR-related febrile seizures	59	2	0	1	1	7.22e-05	7.22e-05	0.00523264	0.219771	0.0166667	0.0327869	0.0210345	rs1333973-rs273259	http://purl.obolibrary.org/obo/HP_0002373, http://www.ebi.ac.uk/efo/EFO_0006519	Other trait	Other trait	Febrile seizure (within the age range of 3 months to 6 years), MMR-related febrile seizures	http://www.ebi.ac.uk/efo/EFO_0000001
User_trait	severe aplastic anemia	severe aplastic anemia	59	2	0	1	1	7.22e-05	7.22e-05	0.00523264	0.219771	0.0166667	0.0327869	0.0210345	rs1126506-rs1042151	http://www.ebi.ac.uk/efo/EFO_0006927	Other trait	Other trait	severe aplastic anemia	http://www.ebi.ac.uk/efo/EFO_0000001
User_trait	unipolar depression, bipolar disorder	unipolar depression, bipolar disorder	59	3	0	1	1	0.000108264	0.00010826	0.00749206	0.329651	0.0163934	0.0322581	0.0220939	rs34005367-rs2535629	http://www.ebi.ac.uk/efo/EFO_0003761, http://www.ebi.ac.uk/efo/EFO_0000289	Neurological disorder	Neurological disorder	unipolar depression, bipolar disorder	http://www.ebi.ac.uk/efo/EFO_0000618
User_trait	B-type natriuretic peptide to N-terminal pro B-type natriuretic peptide ratio	BNP to NT-proBNP ratio	59	3	0	1	1	0.000108264	0.00010826	0.00749206	0.329651	0.0163934	0.0322581	0.0220939	rs7000551-rs2469768	http://www.ebi.ac.uk/efo/EFO_0008469	Cardiovascular measurement	Cardiovascular	B-type natriuretic peptide to N-terminal pro B-type natriuretic peptide ratio	http://www.ebi.ac.uk/efo/EFO_0004298
User_trait	asthma	Asthma	59	432	0	2	2	0.0155899	0.000118002	0.00798482	0.359317	0.00408998	0.00814664	0.00815061	rs35449774-rs72867689|rs75380949-rs3667-rs2647025	http://www.ebi.ac.uk/efo/EFO_0000270	Other disease	Lung disease	asthma	http://www.ebi.ac.uk/efo/EFO_0000408
User_trait	acute myeloid leukemia	Acute Myeloid Leukemia	59	2598	0	3	3	0.0937562	0.00012191	0.00806993	0.371217	0.00113037	0.00225819	0.00280248	rs2031225-rs3767964|rs2010604-rs10774671|rs4794975-rs9901734	http://www.ebi.ac.uk/efo/EFO_0000222	Cancer	Cancer	acute myeloid leukemia	http://www.ebi.ac.uk/efo/EFO_0000616
User_trait	apolipoprotein A 1 measurement	Apo A-1	59	458	1	1	2	0.0165282	0.000132571	0.00858892	0.403679	0.00388349	0.00773694	0.00773726	rs62114506|rs450244-rs7109106	http://www.ebi.ac.uk/efo/EFO_0004614	Lipid or lipoprotein measurement	Lipid/lipoprotein measurement	apolipoprotein A 1 measurement	http://www.ebi.ac.uk/efo/EFO_0004732
User_trait	Stevens-Johnson syndrome, toxic epidermal necrolysis	Stevens-Johnson syndrome, toxic epidermal necrolysis	59	4	0	1	1	0.000144351	0.000144344	0.00872648	0.439526	0.016129	0.031746	0.0224261	rs3130501-rs3130463	http://www.ebi.ac.uk/efo/EFO_0004276, http://www.ebi.ac.uk/efo/EFO_0004775	Other disease	Other disease	Stevens-Johnson syndrome, toxic epidermal necrolysis	http://www.ebi.ac.uk/efo/EFO_0000408
User_trait	glomerular filtration rate	glomerular filtration rate	59	481	0	2	2	0.0173582	0.000146158	0.00872648	0.44505	0.00371747	0.00740741	0.00740504	rs62114506-rs3791221|rs8565-rs41301394	http://www.ebi.ac.uk/efo/EFO_0005208	Other measurement	Other measurement	glomerular filtration rate	http://www.ebi.ac.uk/efo/EFO_0001444
User_trait	low molecular weight phosphotyrosine protein phosphatase measurement	low molecular weight phosphotyrosine protein phosphatase measurement	59	4	0	1	1	0.000144351	0.000144344	0.00872648	0.439526	0.016129	0.031746	0.0224261	rs62114506-rs11553746	http://www.ebi.ac.uk/efo/EFO_0008213	Other measurement	Other measurement	low molecular weight phosphotyrosine protein phosphatase measurement	http://www.ebi.ac.uk/efo/EFO_0001444
User_trait	MMR-related febrile seizures	MMR-related febrile seizures	59	4	0	1	1	0.000144351	0.000144344	0.00872648	0.439526	0.016129	0.031746	0.0224261	rs1333973-rs273259	http://www.ebi.ac.uk/efo/EFO_0006519	Other trait	Other trait	MMR-related febrile seizures	http://www.ebi.ac.uk/efo/EFO_0000001
User_trait	Epstein Barr virus nuclear antigen 1 IgG measurement	EBV antigen IgG	59	5	0	1	1	0.000180439	0.000180426	0.00981068	0.549398	0.015873	0.03125	0.0224744	rs2516049-rs6927022-rs3667	http://www.ebi.ac.uk/efo/EFO_0007790	Other measurement	Infectious	Epstein Barr virus nuclear antigen 1 IgG measurement	http://www.ebi.ac.uk/efo/EFO_0001444
User_trait	multiple myeloma, monoclonal gammopathy	Multiple myeloma	59	5	0	1	1	0.000180439	0.000180426	0.00981068	0.549398	0.015873	0.03125	0.0224744	rs3130463-rs6919908	http://www.ebi.ac.uk/efo/EFO_0001378, http://www.ebi.ac.uk/efo/EFO_0000203	Other disease,Cancer	Cancer	multiple myeloma, monoclonal gammopathy	http://www.ebi.ac.uk/efo/EFO_0000408,http://www.ebi.ac.uk/efo/EFO_0000616
User_trait	schizophrenia, bipolar disorder, schizoaffective disorder	schizophrenia, bipolar disorder, schizoaffective disorder	59	5	0	1	1	0.000180439	0.000180426	0.00981068	0.549398	0.015873	0.03125	0.0224744	rs2710323-rs34005367	http://www.ebi.ac.uk/efo/EFO_0000692, http://www.ebi.ac.uk/efo/EFO_0000289, http://www.ebi.ac.uk/efo/EFO_0005411	Neurological disorder	Neurological disorder	schizophrenia, bipolar disorder, schizoaffective disorder	http://www.ebi.ac.uk/efo/EFO_0000618
User_trait	coffee consumption	coffee consumption	59	5	0	1	1	0.000180439	0.000180426	0.00981068	0.549398	0.015873	0.03125	0.0224744	rs17685-rs8565	http://www.ebi.ac.uk/efo/EFO_0004330	Biological process	Biological process	coffee consumption	http://purl.obolibrary.org/obo/GO_0008150
User_trait	anti-anoctamin 2 antibody measurement	anti-anoctamin 2 antibody measurement	59	5	0	1	1	0.000180439	0.000180426	0.00981068	0.549398	0.015873	0.03125	0.0224744	rs2516049-rs3667	http://www.ebi.ac.uk/efo/EFO_0010150	Other measurement	Other measurement	anti-anoctamin 2 antibody measurement	http://www.ebi.ac.uk/efo/EFO_0001444
User_trait	C-reactive protein measurement	C-Reactive Protein	59	571	0	2	2	0.0206062	0.000205608	0.0109838	0.626075	0.00318471	0.00634921	0.00633983	rs6446205-rs6786055|rs9611454-rs103197	http://www.ebi.ac.uk/efo/EFO_0004458	Inflammatory measurement	Inflammatory	C-reactive protein measurement	http://www.ebi.ac.uk/efo/EFO_0004872
User_trait	acute graft vs. host disease	aGVHD	59	6	0	1	1	0.000216527	0.000216508	0.011139	0.659266	0.015625	0.0307692	0.0223865	rs9277378-rs1126506	http://www.ebi.ac.uk/efo/EFO_0004599	Immune system disorder	Immune disorder	acute graft vs. host disease	http://www.ebi.ac.uk/efo/EFO_0000540
User_trait	late-onset myasthenia gravis	Late-onset Myasthenia Gravis	59	6	0	1	1	0.000216527	0.000216508	0.011139	0.659266	0.015625	0.0307692	0.0223865	rs9269964-rs111945767	http://www.ebi.ac.uk/efo/EFO_1001490	Neurological disorder	Neurological disorder	late-onset myasthenia gravis	http://www.ebi.ac.uk/efo/EFO_0000618
User_trait	pulse pressure measurement	pulse pressure measurement	59	595	0	2	2	0.0214723	0.000223146	0.011139	0.67948	0.00306749	0.00611621	0.00610561	rs34005367-rs2302417|rs8373-rs1938598	http://www.ebi.ac.uk/efo/EFO_0005763	Cardiovascular measurement	Cardiovascular	pulse pressure measurement	http://www.ebi.ac.uk/efo/EFO_0004298
User_trait	chronotype measurement	chronotype measurement	59	591	0	2	2	0.0213279	0.000220174	0.011139	0.67043	0.00308642	0.00615385	0.00614344	rs295268-rs296887|rs8373-rs12808544	http://www.ebi.ac.uk/efo/EFO_0008328	Other measurement	Other measurement	chronotype measurement	http://www.ebi.ac.uk/efo/EFO_0001444
User_trait	coffee consumption, cups of coffee per day measurement	coffee consumption, cups of coffee per day measurement	59	7	0	1	1	0.000252615	0.000252588	0.0124053	0.76913	0.0153846	0.030303	0.0222256	rs17685-rs8565	http://www.ebi.ac.uk/efo/EFO_0004330, http://www.ebi.ac.uk/efo/EFO_0006782	Other measurement,Biological process	Other measurement	coffee consumption, cups of coffee per day measurement	http://purl.obolibrary.org/obo/GO_0008150,http://www.ebi.ac.uk/efo/EFO_0001444
User_trait	cognitive function measurement	cognitive function measurement	59	644	0	2	2	0.0232406	0.000261149	0.0126222	0.7952	0.00285307	0.0056899	0.00567738	rs9266257-rs3130463|rs34005367-rs4434138	http://www.ebi.ac.uk/efo/EFO_0008354	Other measurement	Other measurement	cognitive function measurement	http://www.ebi.ac.uk/efo/EFO_0001444
User_trait	waist-hip ratio	waist-hip ratio	59	723	0	2	2	0.0260915	0.000328603	0.0147147	1	0.0025641	0.00511509	0.00510061	rs10933-rs34005367|rs6446205-rs6446204	http://www.ebi.ac.uk/efo/EFO_0004343	Body measurement	Body measurement	waist-hip ratio	http://www.ebi.ac.uk/efo/EFO_0004324
User_trait	frontal fibrosing alopecia	frontal fibrosing alopecia	59	9	0	1	1	0.000324791	0.000324744	0.0147147	0.988847	0.0149254	0.0294118	0.0217959	rs3130463-rs2523616	http://www.ebi.ac.uk/efo/EFO_0009855	Other disease	Other disease	frontal fibrosing alopecia	http://www.ebi.ac.uk/efo/EFO_0000408
User_trait	bitter beverage consumption measurement	bitter beverage consumption measurement	59	9	0	1	1	0.000324791	0.000324744	0.0147147	0.988847	0.0149254	0.0294118	0.0217959	rs17685-rs8565	http://www.ebi.ac.uk/efo/EFO_0010089	Other measurement	Other measurement	bitter beverage consumption measurement	http://www.ebi.ac.uk/efo/EFO_0001444
User_trait	bitter non-alcoholic beverage consumption measurement	bitter non-alcoholic beverage consumption measurement	59	9	0	1	1	0.000324791	0.000324744	0.0147147	0.988847	0.0149254	0.0294118	0.0217959	rs8565-rs1057868	http://www.ebi.ac.uk/efo/EFO_0010093	Other measurement	Other measurement	bitter non-alcoholic beverage consumption measurement	http://www.ebi.ac.uk/efo/EFO_0001444
User_trait	serum IgE measurement	serum IgE measurement	59	9	0	1	1	0.000324791	0.000324744	0.0147147	0.988847	0.0149254	0.0294118	0.0217959	rs3130463-rs3130941	http://www.ebi.ac.uk/efo/EFO_0004579	Other measurement	Other measurement	serum IgE measurement	http://www.ebi.ac.uk/efo/EFO_0001444
User_trait	leukocyte count	Leukocyte count	59	830	0	2	2	0.0299529	0.000432067	0.0190673	1	0.00225479	0.00449944	0.00448365	rs696825-rs296887|rs566130-rs8107194	http://www.ebi.ac.uk/efo/EFO_0004308	Hematological measurement	Hematological	leukocyte count	http://www.ebi.ac.uk/efo/EFO_0004503
User_trait	mean corpuscular hemoglobin	mean corpuscular hemoglobin	59	918	0	2	2	0.0331286	0.000527526	0.0229474	1	0.00205128	0.00409417	0.00407798	rs1678527-rs3825078|rs6446205-rs9833388	http://www.ebi.ac.uk/efo/EFO_0004527	Hematological measurement	Hematological	mean corpuscular hemoglobin	http://www.ebi.ac.uk/efo/EFO_0004503
User_trait	attention deficit hyperactivity disorder, unipolar depression, schizophrenia, autism spectrum disorder, bipolar disorder	attention deficit hyperactivity disorder, unipolar depression, schizophrenia, autism spectrum disorder, bipolar disorder	59	16	0	1	1	0.000577405	0.000577252	0.0240785	1	0.0135135	0.0266667	0.0200411	rs34005367-rs2535629	http://www.ebi.ac.uk/efo/EFO_0003888, http://www.ebi.ac.uk/efo/EFO_0003761, http://www.ebi.ac.uk/efo/EFO_0000692, http://www.ebi.ac.uk/efo/EFO_0003756, http://www.ebi.ac.uk/efo/EFO_0000289	Neurological disorder	Neurological disorder	attention deficit hyperactivity disorder, unipolar depression, schizophrenia, autism spectrum disorder, bipolar disorder	http://www.ebi.ac.uk/efo/EFO_0000618
User_trait	osteoarthritis, knee	osteoarthritis, knee	59	16	0	1	1	0.000577405	0.000577252	0.0240785	1	0.0135135	0.0266667	0.0200411	rs9277552-rs1126506	http://www.ebi.ac.uk/efo/EFO_0004616	Other disease	Immune disorder	osteoarthritis, knee	http://www.ebi.ac.uk/efo/EFO_0000408
User_trait	unipolar depression, schizophrenia	unipolar depression, schizophrenia	59	16	0	1	1	0.000577405	0.000577252	0.0240785	1	0.0135135	0.0266667	0.0200411	rs34005367-rs2535629	http://www.ebi.ac.uk/efo/EFO_0003761, http://www.ebi.ac.uk/efo/EFO_0000692	Neurological disorder	Neurological disorder	unipolar depression, schizophrenia	http://www.ebi.ac.uk/efo/EFO_0000618
User_trait	tea consumption measurement	tea consumption measurement	59	17	0	1	1	0.000613493	0.000613319	0.0252373	1	0.0133333	0.0263158	0.019795	rs56163935-rs8565	http://www.ebi.ac.uk/efo/EFO_0010091	Other measurement	Other measurement	tea consumption measurement	http://www.ebi.ac.uk/efo/EFO_0001444
User_trait	anxiety measurement	anxiety measurement	59	20	0	1	1	0.000721757	0.000721513	0.0292934	1	0.0128205	0.0253165	0.0190807	rs34005367-rs2071044	http://www.ebi.ac.uk/efo/EFO_0009863	Other measurement	Other measurement	anxiety measurement	http://www.ebi.ac.uk/efo/EFO_0001444
User_trait	susceptibility to plantar warts measurement	susceptibility to plantar warts measurement	59	22	0	1	1	0.000793932	0.000793637	0.0317977	1	0.0125	0.0246914	0.018626	rs3130463-rs9267257	http://www.ebi.ac.uk/efo/EFO_0008406	Other measurement	Other measurement	susceptibility to plantar warts measurement	http://www.ebi.ac.uk/efo/EFO_0001444
User_trait	BMI-adjusted waist-hip ratio	BMI-adjusted waist-hip ratio	59	1178	0	2	2	0.0425115	0.000863646	0.0341533	1	0.00161943	0.00323363	0.00321778	rs34005367-rs2276824|rs6446205-rs6446204	http://www.ebi.ac.uk/efo/EFO_0007788	Body measurement	Body measurement	BMI-adjusted waist-hip ratio	http://www.ebi.ac.uk/efo/EFO_0004324
User_trait	self reported educational attainment, refractive error measurement	self reported educational attainment, refractive error measurement	59	25	0	1	1	0.000902196	0.000901812	0.0352053	1	0.0120482	0.0238095	0.0179771	rs62114506-rs60843830	http://www.ebi.ac.uk/efo/EFO_0004784, http://www.ebi.ac.uk/efo/EFO_0007814	Other measurement	Other measurement	self reported educational attainment, refractive error measurement	http://www.ebi.ac.uk/efo/EFO_0001444
User_trait	factor VIII measurement	Factor VIII measurement	59	26	0	1	1	0.000938284	0.000937868	0.0361495	1	0.0119048	0.0235294	0.0177696	rs9271597-rs3667	http://www.ebi.ac.uk/efo/EFO_0004630	Hematological measurement	Hematological	factor VIII measurement	http://www.ebi.ac.uk/efo/EFO_0004503
User_trait	cervical carcinoma	Cervical Carcinoma	59	30	0	1	1	0.00108263	0.00108208	0.0392253	1	0.0113636	0.0224719	0.0169811	rs3132461-rs3130463	http://www.ebi.ac.uk/efo/EFO_0001061	Cancer	Cancer	cervical carcinoma	http://www.ebi.ac.uk/efo/EFO_0000616
User_trait	lung adenocarcinoma	Lung Adenocarcinoma	59	30	0	1	1	0.00108263	0.00108208	0.0392253	1	0.0113636	0.0224719	0.0169811	rs2179920-rs1126506	http://www.ebi.ac.uk/efo/EFO_0000571	Cancer	Cancer	lung adenocarcinoma	http://www.ebi.ac.uk/efo/EFO_0000616
User_trait	adiponectin measurement	adiponectin measurement	59	29	0	1	1	0.00104655	0.00104603	0.0392253	1	0.0114943	0.0227273	0.0171721	rs34005367-rs13303	http://www.ebi.ac.uk/efo/EFO_0004502	Other measurement	Other measurement	adiponectin measurement	http://www.ebi.ac.uk/efo/EFO_0001444
User_trait	cups of coffee per day measurement	cups of coffee per day measurement	59	29	0	1	1	0.00104655	0.00104603	0.0392253	1	0.0114943	0.0227273	0.0171721	rs17685-rs8565	http://www.ebi.ac.uk/efo/EFO_0006782	Other measurement	Other measurement	cups of coffee per day measurement	http://www.ebi.ac.uk/efo/EFO_0001444
User_trait	mosquito bite reaction itch intensity measurement, mosquito bite reaction size measurement	mosquito bite reaction itch intensity measurement, mosquito bite reaction size measurement	59	30	0	1	1	0.00108263	0.00108208	0.0392253	1	0.0113636	0.0224719	0.0169811	rs3130463-rs2857598	http://www.ebi.ac.uk/efo/EFO_0008377, http://www.ebi.ac.uk/efo/EFO_0008378	Other measurement	Other measurement	mosquito bite reaction itch intensity measurement, mosquito bite reaction size measurement	http://www.ebi.ac.uk/efo/EFO_0001444
User_trait	dentures	dentures	59	36	0	1	1	0.00129916	0.00129836	0.0465117	1	0.0106383	0.0210526	0.0159141	rs4302256-rs5831974	http://www.ebi.ac.uk/efo/EFO_0010078	Other trait	Other trait	dentures	http://www.ebi.ac.uk/efo/EFO_0000001
User_trait	osteoarthritis, hip	osteoarthritis, hip	59	37	0	1	1	0.00133525	0.0013344	0.047247	1	0.0105263	0.0208333	0.0157486	rs34005367-rs3774355	http://www.ebi.ac.uk/efo/EFO_1000786	Other disease	Immune disorder	osteoarthritis, hip	http://www.ebi.ac.uk/efo/EFO_0000408
User_trait	HDL cholesterol change measurement, physical activity	HDL	59	39	0	1	1	0.00140743	0.00140648	0.0486673	1	0.0103093	0.0204082	0.0154273	rs4847412-rs3767964	http://www.ebi.ac.uk/efo/EFO_0007805, http://www.ebi.ac.uk/efo/EFO_0003940	Biological process,Lipid or lipoprotein measurement	Lipid/lipoprotein measurement	HDL cholesterol change measurement, physical activity	http://purl.obolibrary.org/obo/GO_0008150,http://www.ebi.ac.uk/efo/EFO_0004732
User_trait	bilirubin measurement	bilirubin measurement	59	39	0	1	1	0.00140743	0.00140648	0.0486673	1	0.0103093	0.0204082	0.0154273	rs7109106-rs1661052	http://www.ebi.ac.uk/efo/EFO_0004570	Other measurement	Other measurement	bilirubin measurement	http://www.ebi.ac.uk/efo/EFO_0001444
User_trait	systemic scleroderma	Systemic Scleroderma	59	41	0	1	1	0.0014796	0.00147855	0.0494746	1	0.010101	0.02	0.0151184	rs987870-rs1126506-rs72867689	http://www.ebi.ac.uk/efo/EFO_0000717	Cardiovascular disease	Cardiovascular	systemic scleroderma	http://www.ebi.ac.uk/efo/EFO_0000319
User_trait	mathematical ability	mathematical ability	59	1538	0	2	2	0.0555031	0.00146023	0.0494746	1	0.00125392	0.0025047	0.0024904	rs8565-rs41301394|rs9266257-rs3130463	http://www.ebi.ac.uk/efo/EFO_0004875	Biological process	Biological process	mathematical ability	http://purl.obolibrary.org/obo/GO_0008150
User_trait	smoking behavior, BMI-adjusted waist-hip ratio	smoking behavior, BMI-adjusted waist-hip ratio	59	41	0	1	1	0.0014796	0.00147855	0.0494746	1	0.010101	0.02	0.0151184	rs13083798-rs34005367	http://www.ebi.ac.uk/efo/EFO_0004318, http://www.ebi.ac.uk/efo/EFO_0007788	Body measurement,Biological process	Body measurement	smoking behavior, BMI-adjusted waist-hip ratio	http://purl.obolibrary.org/obo/GO_0008150,http://www.ebi.ac.uk/efo/EFO_0004324
User_trait	BMI-adjusted waist-hip ratio, sex interaction measurement, age at assessment	BMI-adjusted waist-hip ratio, sex interaction measurement, age at assessment	59	42	0	1	1	0.00151569	0.00151459	0.0501295	1	0.01	0.019802	0.0149685	rs12489828-rs34005367	http://www.ebi.ac.uk/efo/EFO_0007788, http://www.ebi.ac.uk/efo/EFO_0008343, http://www.ebi.ac.uk/efo/EFO_0008007	Body measurement,Other measurement	Body measurement,Other measurement	BMI-adjusted waist-hip ratio, sex interaction measurement, age at assessment	http://www.ebi.ac.uk/efo/EFO_0001444,http://www.ebi.ac.uk/efo/EFO_0004324
User_trait	feeling nervous measurement	feeling nervous measurement	59	45	0	1	1	0.00162395	0.00162269	0.0531299	1	0.00970874	0.0192308	0.0145355	rs34005367-rs9879090	http://www.ebi.ac.uk/efo/EFO_0009597	Other measurement	Other measurement	feeling nervous measurement	http://www.ebi.ac.uk/efo/EFO_0001444
User_trait	dental caries, dentures	dental caries, dentures	59	47	0	1	1	0.00169613	0.00169475	0.053201	1	0.00952381	0.0188679	0.0142601	rs4302256-rs5831974	http://www.ebi.ac.uk/efo/EFO_0003819, http://www.ebi.ac.uk/efo/EFO_0010078	Other trait,Digestive system disorder	Other trait,Digestive system disorder	dental caries, dentures	http://www.ebi.ac.uk/efo/EFO_0000405,http://www.ebi.ac.uk/efo/EFO_0000001
User_trait	irritability measurement	irritability measurement	59	47	0	1	1	0.00169613	0.00169475	0.053201	1	0.00952381	0.0188679	0.0142601	rs6446205-rs3774800	http://www.ebi.ac.uk/efo/EFO_0009594	Other measurement	Other measurement	irritability measurement	http://www.ebi.ac.uk/efo/EFO_0001444
User_trait	BMI-adjusted waist-hip ratio, physical activity measurement	BMI-adjusted waist-hip ratio, physical activity measurement	59	47	0	1	1	0.00169613	0.00169475	0.053201	1	0.00952381	0.0188679	0.0142601	rs34005367-rs2590838	http://www.ebi.ac.uk/efo/EFO_0007788, http://www.ebi.ac.uk/efo/EFO_0008002	Body measurement,Other measurement	Body measurement,Other measurement	BMI-adjusted waist-hip ratio, physical activity measurement	http://www.ebi.ac.uk/efo/EFO_0001444,http://www.ebi.ac.uk/efo/EFO_0004324
User_trait	mosquito bite reaction itch intensity measurement	mosquito bite reaction itch intensity measurement	59	47	0	1	1	0.00169613	0.00169475	0.053201	1	0.00952381	0.0188679	0.0142601	rs3130463-rs2857598	http://www.ebi.ac.uk/efo/EFO_0008377	Other measurement	Other measurement	mosquito bite reaction itch intensity measurement	http://www.ebi.ac.uk/efo/EFO_0001444
User_trait	coffee consumption measurement	coffee consumption measurement	59	48	0	1	1	0.00173222	0.00173077	0.0537776	1	0.00943396	0.0186916	0.0141262	rs8565-rs1057868	http://www.ebi.ac.uk/efo/EFO_0006781	Other measurement	Other measurement	coffee consumption measurement	http://www.ebi.ac.uk/efo/EFO_0001444
User_trait	IL8_Uninfected_Mean	IL8_Uninfected_Mean	59	50	0	1	1	0.00180439	0.00180282	0.0554385	1	0.00925926	0.0183486	0.0138658	rs1809820-rs67573812	NA	NA	NA	IL8_Uninfected_Mean	NA
User_trait	Toxo_5hr_gfp_Mean	Toxo_5hr_gfp_Mean	59	51	0	1	1	0.00184048	0.00183885	0.0554385	1	0.00917431	0.0181818	0.013739	rs12536421-rs2188155	NA	NA	NA	Toxo_5hr_gfp_Mean	NA
User_trait	bipolar disorder	bipolar disorder	59	51	0	1	1	0.00184048	0.00183885	0.0554385	1	0.00917431	0.0181818	0.013739	rs34005367-rs2302417	http://www.ebi.ac.uk/efo/EFO_0000289	Neurological disorder	Neurological disorder	bipolar disorder	http://www.ebi.ac.uk/efo/EFO_0000618
User_trait	parental longevity	parental longevity	59	53	0	1	1	0.00191266	0.00191089	0.0564919	1	0.00900901	0.0178571	0.0134923	rs17685-rs8565	http://www.ebi.ac.uk/efo/EFO_0007796	Other measurement	Other measurement	parental longevity	http://www.ebi.ac.uk/efo/EFO_0001444
User_trait	chronic lymphocytic leukemia	chronic lymphocytic leukemia	59	53	0	1	1	0.00191266	0.00191089	0.0564919	1	0.00900901	0.0178571	0.0134923	rs6489882-rs10774671	http://www.ebi.ac.uk/efo/EFO_0000095	Cancer	Cancer	chronic lymphocytic leukemia	http://www.ebi.ac.uk/efo/EFO_0000616
User_trait	tonsillectomy risk measurement	tonsillectomy risk measurement	59	57	0	1	1	0.00205701	0.00205497	0.060167	1	0.00869565	0.0172414	0.0130241	rs35957722-rs3667	http://www.ebi.ac.uk/efo/EFO_0007924	Other measurement	Other measurement	tonsillectomy risk measurement	http://www.ebi.ac.uk/efo/EFO_0001444
User_trait	self reported educational attainment	self reported educational attainment	59	1853	0	2	2	0.0668708	0.00210447	0.0610295	1	0.00104712	0.00209205	0.00207916	rs6465353-rs2188155|rs7526112-rs3767964	http://www.ebi.ac.uk/efo/EFO_0004784	Other measurement	Other measurement	self reported educational attainment	http://www.ebi.ac.uk/efo/EFO_0001444
User_trait	allergic rhinitis	allergic rhinitis	59	62	0	1	1	0.00223745	0.00223503	0.0642043	1	0.00833333	0.0165289	0.0124822	rs3204853-rs111371454	http://www.ebi.ac.uk/efo/EFO_0005854	Immune system disorder	Immune system disorder	allergic rhinitis	http://www.ebi.ac.uk/efo/EFO_0000540
User_trait	reaction time measurement	reaction time measurement	59	64	0	1	1	0.00230962	0.00230704	0.064449	1	0.00819672	0.0162602	0.0122777	rs296887-rs10125715	http://www.ebi.ac.uk/efo/EFO_0008393	Other measurement	Other measurement	reaction time measurement	http://www.ebi.ac.uk/efo/EFO_0001444
User_trait	Vitiligo	Vitiligo	59	64	0	1	1	0.00230962	0.00230704	0.064449	1	0.00819672	0.0162602	0.0122777	rs9271597-rs3667	http://www.ebi.ac.uk/efo/EFO_0004208	Immune system disorder	Immune system disorder	Vitiligo	http://www.ebi.ac.uk/efo/EFO_0000540
User_trait	cerebrospinal fluid biomarker measurement	cerebrospinal fluid biomarker measurement	59	64	0	1	1	0.00230962	0.00230704	0.064449	1	0.00819672	0.0162602	0.0122777	rs62114506-rs17714252	http://www.ebi.ac.uk/efo/EFO_0006794	Other measurement	Other measurement	cerebrospinal fluid biomarker measurement	http://www.ebi.ac.uk/efo/EFO_0001444
User_trait	worry measurement	worry measurement	59	74	0	1	1	0.0026705	0.00266704	0.0738286	1	0.00757576	0.0150376	0.0113475	rs34005367-rs11130306	http://www.ebi.ac.uk/efo/EFO_0009589	Other measurement	Other measurement	worry measurement	http://www.ebi.ac.uk/efo/EFO_0001444
User_trait	keratinocyte carcinoma	keratinocyte carcinoma	59	78	0	1	1	0.00281485	0.00281101	0.0771128	1	0.00735294	0.0145985	0.0110135	rs72867689-rs9277332	http://www.ebi.ac.uk/efo/EFO_0010176	Cancer	Cancer	keratinocyte carcinoma	http://www.ebi.ac.uk/efo/EFO_0000616
User_trait	alcohol consumption measurement, high density lipoprotein cholesterol measurement	alcohol consumption measurement, high density lipoprotein cholesterol measurement	59	85	0	1	1	0.00306747	0.0030629	0.0832726	1	0.00699301	0.0138889	0.0104737	rs3767964-rs4847240	http://www.ebi.ac.uk/efo/EFO_0007878, http://www.ebi.ac.uk/efo/EFO_0004612	Other measurement,Lipid or lipoprotein measurement	Other measurement,Lipid or lipoprotein measurement	alcohol consumption measurement, high density lipoprotein cholesterol measurement	http://www.ebi.ac.uk/efo/EFO_0001444,http://www.ebi.ac.uk/efo/EFO_0004732
User_trait	adult onset asthma	adult onset asthma	59	91	0	1	1	0.00328399	0.00327876	0.0883523	1	0.00671141	0.0133333	0.0100513	rs35789108-rs3667	http://www.ebi.ac.uk/efo/EFO_1002011	Other disease	Other disease	adult onset asthma	http://www.ebi.ac.uk/efo/EFO_0000408
User_trait	alcohol drinking, high density lipoprotein cholesterol measurement	alcohol drinking, high density lipoprotein cholesterol measurement	59	95	0	1	1	0.00342834	0.00342263	0.0914204	1	0.00653595	0.012987	0.00978809	rs3767964-rs4847240	http://www.ebi.ac.uk/efo/EFO_0004329, http://www.ebi.ac.uk/efo/EFO_0004612	Biological process,Lipid or lipoprotein measurement	Biological process,Lipid or lipoprotein measurement	alcohol drinking, high density lipoprotein cholesterol measurement	http://purl.obolibrary.org/obo/GO_0008150,http://www.ebi.ac.uk/efo/EFO_0004732
User_trait	HMG CoA reductase inhibitor use measurement	HMG CoA reductase inhibitor use measurement	59	97	0	1	1	0.00350052	0.00349457	0.09253	1	0.00645161	0.0128205	0.00966155	rs8373-rs1938598	http://www.ebi.ac.uk/efo/EFO_0009932	Other measurement	Other measurement	HMG CoA reductase inhibitor use measurement	http://www.ebi.ac.uk/efo/EFO_0001444
User_trait	anxiety	anxiety	59	98	0	1	1	0.00353661	0.00353053	0.0926764	1	0.00641026	0.0127389	0.0095995	rs34005367-rs4434138	http://www.ebi.ac.uk/efo/EFO_0005230	Other trait	Other trait	anxiety	http://www.ebi.ac.uk/efo/EFO_0000001
User_trait	cigarettes per day measurement	cigarettes per day measurement	59	104	0	1	1	0.00375313	0.00374629	0.0958608	1	0.00617284	0.0122699	0.00924325	rs6446205-rs7636057	http://www.ebi.ac.uk/efo/EFO_0006525	Other measurement	Other measurement	cigarettes per day measurement	http://www.ebi.ac.uk/efo/EFO_0001444
User_trait	Calcium channel blocker use measurement	Calcium channel blocker use measurement	59	104	0	1	1	0.00375313	0.00374629	0.0958608	1	0.00617284	0.0122699	0.00924325	rs10896795-rs8373	http://www.ebi.ac.uk/efo/EFO_0009930	Other measurement	Other measurement	Calcium channel blocker use measurement	http://www.ebi.ac.uk/efo/EFO_0001444
User_trait	age-related hearing impairment	age-related hearing impairment	59	104	0	1	1	0.00375313	0.00374629	0.0958608	1	0.00617284	0.0122699	0.00924325	rs11126435-rs1063588	http://www.ebi.ac.uk/efo/EFO_0005782	Neurological disorder	Neurological disorder	age-related hearing impairment	http://www.ebi.ac.uk/efo/EFO_0000618
