# Supplementary material for: Causal splicing variants revealed by deep-learning integration of single-cell sQTL mapping under influenza infection
Source: Research Square preprint supplement (doi:10.21203/rs.3.rs-8408992/v1), 2026-01-06
Supplement: Supplementary file 4 [file b2f3e3eb2ce9353840a41c09.xlsx]

## Sheet: TableS4_sGene_enrichmentMsigDBh
Term	Overlap_unf	P.value_unf	Adjusted.P.value_unf	Odds.Ratio_unf	Combined.Score_unf	Genes_unf	Overlap_CA09	P.value_CA09	Adjusted.P.value_CA09	Odds.Ratio_CA09	Combined.Score_CA09	Genes_CA09
Adipogenesis	4/200	0.391267	0.891606	1.27059	1.19227	UQCRQ;ATP5PO;UQCR10;COQ9	5/200	0.0672679	0.42603	2.36913	6.39446	UQCRQ;ATP5PO;GHITM;ACADM;COQ9
Allograft Rejection	11/200	0.000364218	0.00692015	3.70775	29.3571	MRPL3;HLA-DMA;RPS9;ITGB2;EIF3J;LY75;MTIF2;HLA-A;FCGR2B;HLA-G;HLA-DQA1	6/200	0.0221693	0.168487	2.87131	10.9369	IFNAR2;HLA-DMA;RPS9;HLA-A;HLA-G;HLA-DQA1
Androgen Response	1/100	0.798444	0.934832	0.626007	0.140908	ELK4	1/100	0.665009	0.83708	0.920501	0.375523	ELK4
Apical Junction	2/200	0.828585	0.934832	0.62482	0.117489	ACTG1;YWHAH	1/200	0.8884	0.8884	0.455611	0.053914	YWHAH
Apoptosis	3/161	0.471088	0.891606	1.18066	0.888697	DAP;PAK1;CFLAR	2/161	0.523314	0.83708	1.14811	0.743483	PAK1;CFLAR
Cholesterol Homeostasis	1974-02-01	0.328159	0.891606	1.72937	1.92696	FDPS;ACTG1	1974-01-01	0.554595	0.83708	1.25	0.736897	FDPS
Complement	2/200	0.828585	0.934832	0.62482	0.117489	EHD1;CD46	1/200	0.8884	0.8884	0.455611	0.053914	CTSH
DNA Repair	2/150	0.690189	0.934832	0.838052	0.310741	NFX1;SUPT5H	1/150	0.806513	0.8884	0.610055	0.131183	SMAD5
E2F Targets	8/200	0.0147055	0.0931349	2.62824	11.0899	PSMC3IP;GINS1;CENPE;DNMT1;CSE1L;MCM3;NBN;SNRPB	4/200	0.173069	0.597873	1.87669	3.29184	GINS1;CENPE;DNMT1;CSE1L
Estrogen Response Late	4/200	0.391267	0.891606	1.27059	1.19227	ALDH3A2;DCXR;NRIP1;COX6C	2/200	0.641087	0.83708	0.920132	0.409082	ALDH3A2;COX6C
Fatty Acid Metabolism	6/158	0.0403206	0.193119	2.47897	7.95972	ALDH3A2;HADHB;UROS;NBN;KMT5A;YWHAH	6/158	0.00764217	0.0726006	3.67255	17.9003	ALDH3A2;CCDC58;UBE2L6;ACADM;METAP1;YWHAH
G2-M Checkpoint	9/200	0.00474801	0.0451061	2.98205	15.9541	CASP8AP2;CENPE;DR1;PRC1;TROAP;MCM3;KMT5A;BUB3;MNAT1	2/200	0.641087	0.83708	0.920132	0.409082	CENPE;CDC7
Glycolysis	4/200	0.391267	0.891606	1.27059	1.19227	UGP2;GFPT1;NDUFV3;PFKP	2/200	0.641087	0.83708	0.920132	0.409082	UGP2;PFKP
heme Metabolism	4/200	0.391267	0.891606	1.27059	1.19227	RNF19A;UROS;HTRA2;HAGH	1/200	0.8884	0.8884	0.455611	0.053914	HAGH
Hypoxia	2/200	0.828585	0.934832	0.62482	0.117489	UGP2;PFKP	2/200	0.641087	0.83708	0.920132	0.409082	UGP2;PFKP
IL-2/STAT5 Signaling	3/199	0.613619	0.926261	0.949906	0.463915	GSTO1;SWAP70;DCPS	2/199	0.638373	0.83708	0.924849	0.415103	NCOA3;CTSZ
Interferon Alpha Response	1997-02-01	0.45647	0.891606	1.30914	1.02667	HLA-C;IFI44L	1997-05-01	0.00412569	0.0522588	5.04794	27.7158	MX1;HLA-C;IFI44;UBE2L6;IFI44L
Interferon Gamma Response	9/200	0.00474801	0.0451061	2.98205	15.9541	HLA-DMA;HLA-B;TNFAIP2;HLA-A;HLA-G;HLA-DQA1;HLA-DRB1;IFI44L;PFKP	13/200	2.99386e-07	1.13767e-05	6.67789	100.312	IFNAR2;NCOA3;MX1;HLA-B;IFI44;UBE2L6;HLA-A;HLA-G;IFI44L;HLA-DMA;HLA-DQA1;HLA-DRB1;PFKP
KRAS Signaling Dn	2/200	0.828585	0.934832	0.62482	0.117489	SIDT1;IFI44L	3/200	0.369693	0.826372	1.39376	1.3869	MX1;SIDT1;IFI44L
Mitotic Spindle	5/199	0.209306	0.795363	1.60992	2.51784	CENPE;PCM1;STAU1;PRC1;STK38L	3/199	0.366743	0.826372	1.40094	1.40527	CEP57;CENPE;PCM1
mTORC1 Signaling	7/200	0.0406567	0.193119	2.28029	7.30285	PSMA4;PSMB5;ITGB2;M6PR;POLR3G;EIF2S2;PSPH	4/200	0.173069	0.597873	1.87669	3.29184	USO1;M6PR;EIF2S2;HSP90B1
Myc Targets V1	8/200	0.0147055	0.0931349	2.62824	11.0899	PSMA4;RPLP0;EIF3J;SNRPB2;SNRPD3;BUB3;EIF2S2;GNL3	4/200	0.173069	0.597873	1.87669	3.29184	RPLP0;SNRPB2;EIF2S2;GNL3
Myc Targets V2	1958-01-01	0.604654	0.926261	1.08961	0.548179	GNL3	1958-01-01	0.469346	0.83708	1.60218	1.21191	GNL3
Myogenesis	1/200	0.959703	0.959703	0.30984	0.0127442	FDPS	1/200	0.8884	0.8884	0.455611	0.053914	FDPS
Oxidative Phosphorylation	11/200	0.000364218	0.00692015	3.70775	29.3571	HADHB;COX7A2L;ATP5PD;UQCRB;UQCRQ;NDUFA3;ATP5PO;HTRA2;UQCR10;COX6C;MRPL11	9/200	0.000347472	0.00660197	4.43838	35.3509	COX7A2L;ATP5PD;UQCRB;UQCRQ;ATP5PO;NDUFB2;NDUFB1;ACADM;COX6C
p53 Pathway	2/200	0.828585	0.934832	0.62482	0.117489	ABHD4;DCXR	2/200	0.641087	0.83708	0.920132	0.409082	MDM2;TPRKB
Pancreas Beta Cells	1940-01-01	0.472552	0.891606	1.59396	1.19485	SRP14	1940-01-01	0.353899	0.826372	2.34378	2.43459	SRP14
Pperoxisome	2/104	0.49273	0.891606	1.21886	0.862703	FDPS;YWHAH	2/104	0.311719	0.826372	1.79489	2.09222	FDPS;YWHAH
Protein Secretion	1996-04-01	0.0664075	0.280387	2.72135	7.38015	TMX1;COPB1;SNAP23;M6PR	1996-03-01	0.086659	0.470058	2.96804	7.25917	COPB1;USO1;M6PR
Reactive Oxygen Species Pathway	1949-01-01	0.543341	0.926261	1.2945	0.78967	PFKP	1949-02-01	0.0989595	0.470058	3.90619	9.03518	MGST1;PFKP
Spermatogenesis	2/135	0.633757	0.926261	0.933286	0.425661	PARP2;GAD1	2/135	0.431688	0.83708	1.37437	1.15454	PARP2;STRBP
TNF-alpha Signaling via NF-kB	4/200	0.391267	0.891606	1.27059	1.19227	EHD1;BCL2A1;TNFAIP2;CFLAR	2/200	0.641087	0.83708	0.920132	0.409082	BCL2A1;CFLAR
Unfolded Protein Response	1/113	0.836428	0.934832	0.552978	0.0987699	YIF1A	2/113	0.347428	0.826372	1.64861	1.7429	YIF1A;HSP90B1
UV Response Up	1/158	0.920689	0.959703	0.393574	0.0325221	PARP2	2/158	0.513251	0.83708	1.17036	0.780621	PARP2;HLA-F
Wnt-beta Catenin Signaling	1942-01-01	0.489173	0.891606	1.51605	1.08404	NUMB	1942-01-01	0.367871	0.826372	2.22922	2.22927	NUMB
