# Supplementary material for: Causal splicing variants revealed by deep-learning integration of single-cell sQTL mapping under influenza infection
Source: Research Square preprint supplement (doi:10.21203/rs.3.rs-8408992/v1), 2026-01-06
Supplement: Supplementary file 5 [file bfe37b052c22879db3532402.xlsx]

## Sheet: Sheet1
GeneName	GroupID	FeatureID	FeatureLabel	psi(scHH3Uninfected)	psi(scHHDCA09)	p-value	q-value	dPSI
RBX1	clu_6045_?	i001	chr22:40951476-40953555	0.0311706	0.0248557	2.43346e-113	1.3569e-109	-0.00631494
RBX1	clu_6045_?	i002	chr22:40951476-40964047	0.00150582	0.00137696	2.43346e-113	1.3569e-109	-0.000128852
RBX1	clu_6045_?	i003	chr22:40951476-40967799	0.00292851	0.00254332	2.43346e-113	1.3569e-109	-0.000385183
RBX1	clu_6045_?	i004	chr22:40953633-40955287	0.00198147	0.00166519	2.43346e-113	1.3569e-109	-0.000316278
RBX1	clu_6045_?	i005	chr22:40953633-40964047	0.0468289	0.0611182	2.43346e-113	1.3569e-109	0.0142894
RBX1	clu_6045_?	i006	chr22:40964117-40967799	0.209685	0.244071	2.43346e-113	1.3569e-109	0.0343862
RBX1	clu_6045_?	i007	chr22:40964117-40972476	0.00864958	0.00780705	2.43346e-113	1.3569e-109	-0.00084253
RBX1	clu_6045_?	i008	chr22:40967884-40972476	0.697251	0.656563	2.43346e-113	1.3569e-109	-0.0406878
COX5A	clu_10407_?	i001	chr15:74920442-74923648	0.790394	0.745721	7.58722e-110	2.11532e-106	-0.044673
COX5A	clu_10407_?	i002	chr15:74920442-74926766	0.00979456	0.0091883	7.58722e-110	2.11532e-106	-0.000606259
COX5A	clu_10407_?	i003	chr15:74920442-74929116	0.00949649	0.00848565	7.58722e-110	2.11532e-106	-0.00101084
COX5A	clu_10407_?	i004	chr15:74923725-74926766	0.00212442	0.00269013	7.58722e-110	2.11532e-106	0.000565707
COX5A	clu_10407_?	i005	chr15:74923770-74926766	0.171443	0.213533	7.58722e-110	2.11532e-106	0.0420898
COX5A	clu_10407_?	i006	chr15:74923770-74929116	0.0016441	0.00200086	7.58722e-110	2.11532e-106	0.000356761
COX5A	clu_10407_?	i007	chr15:74926887-74929116	0.0151033	0.0183812	7.58722e-110	2.11532e-106	0.00327787
SLFN13,SLFN12L	clu_32150_?	i001	chr17:35445693-35446717	0.0112003	0.0113	2.41186e-108	4.48285e-105	9.97606e-05
SLFN13,SLFN12L	clu_32150_?	i002	chr17:35445693-35446840	0.00902939	0.00689418	2.41186e-108	4.48285e-105	-0.00213521
SLFN13,SLFN12L	clu_32150_?	i003	chr17:35445693-35447268	0.176156	0.130754	2.41186e-108	4.48285e-105	-0.0454023
SLFN13,SLFN12L	clu_32150_?	i004	chr17:35445693-35448722	0.0030707	0.0039436	2.41186e-108	4.48285e-105	0.000872899
SLFN13,SLFN12L	clu_32150_?	i005	chr17:35445693-35522279	0.0016106	0.00275776	2.41186e-108	4.48285e-105	0.00114716
SLFN13,SLFN12L	clu_32150_?	i006	chr17:35446753-35446840	0.00426821	0.00306148	2.41186e-108	4.48285e-105	-0.00120672
SLFN13,SLFN12L	clu_32150_?	i007	chr17:35446753-35447268	0.025545	0.0223442	2.41186e-108	4.48285e-105	-0.00320081
SLFN13,SLFN12L	clu_32150_?	i008	chr17:35446932-35447268	0.0158345	0.0140449	2.41186e-108	4.48285e-105	-0.00178957
SLFN13,SLFN12L	clu_32150_?	i009	chr17:35447414-35448273	0.0310924	0.0195161	2.41186e-108	4.48285e-105	-0.0115762
SLFN13,SLFN12L	clu_32150_?	i010	chr17:35447414-35448722	0.472372	0.336444	2.41186e-108	4.48285e-105	-0.135928
SLFN13,SLFN12L	clu_32150_?	i011	chr17:35447414-35449082	0.0192668	0.021531	2.41186e-108	4.48285e-105	0.00226421
SLFN13,SLFN12L	clu_32150_?	i012	chr17:35447414-35449460	0.00271731	0.00324242	2.41186e-108	4.48285e-105	0.000525105
SLFN13,SLFN12L	clu_32150_?	i013	chr17:35447414-35522279	0.00333338	0.00831958	2.41186e-108	4.48285e-105	0.0049862
SLFN13,SLFN12L	clu_32150_?	i014	chr17:35447427-35448722	0.00720305	0.00497773	2.41186e-108	4.48285e-105	-0.00222532
SLFN13,SLFN12L	clu_32150_?	i015	chr17:35448362-35448722	0.00295452	0.00212545	2.41186e-108	4.48285e-105	-0.000829073
SLFN13,SLFN12L	clu_32150_?	i016	chr17:35449241-35449460	0.00708901	0.00358641	2.41186e-108	4.48285e-105	-0.0035026
SLFN13,SLFN12L	clu_32150_?	i017	chr17:35449241-35522279	0.0021164	0.00542438	2.41186e-108	4.48285e-105	0.00330798
SLFN13,SLFN12L	clu_32150_?	i018	chr17:35478185-35479117	0.00296462	0.00421054	2.41186e-108	4.48285e-105	0.00124593
SLFN13,SLFN12L	clu_32150_?	i019	chr17:35478185-35487726	0.00109928	0.00276104	2.41186e-108	4.48285e-105	0.00166176
SLFN13,SLFN12L	clu_32150_?	i020	chr17:35480195-35487726	0.0600522	0.0318302	2.41186e-108	4.48285e-105	-0.028222
SLFN13,SLFN12L	clu_32150_?	i021	chr17:35480195-35490380	0.00217542	0.00411878	2.41186e-108	4.48285e-105	0.00194337
SLFN13,SLFN12L	clu_32150_?	i022	chr17:35480195-35522279	0.101123	0.261144	2.41186e-108	4.48285e-105	0.160021
SLFN13,SLFN12L	clu_32150_?	i023	chr17:35490449-35522279	0.000947399	0.00244546	2.41186e-108	4.48285e-105	0.00149806
SLFN13,SLFN12L	clu_32150_?	i024	chr17:35492818-35522279	0.0025591	0.00638006	2.41186e-108	4.48285e-105	0.00382096
SLFN13,SLFN12L	clu_32150_?	i025	chr17:35508803-35510893	0.0026515	0.00682408	2.41186e-108	4.48285e-105	0.00417258
SLFN13,SLFN12L	clu_32150_?	i026	chr17:35508803-35522279	0.00489778	0.0124565	2.41186e-108	4.48285e-105	0.00755868
SLFN13,SLFN12L	clu_32150_?	i027	chr17:35510973-35522279	0.00418836	0.00984508	2.41186e-108	4.48285e-105	0.00565672
SLFN13,SLFN12L	clu_32150_?	i028	chr17:35515321-35522279	0.0224822	0.0577171	2.41186e-108	4.48285e-105	0.0352349
UXT	clu_3809_?	i001	chrX:47652144-47657183	0.707707	0.645282	7.14682e-97	9.96266e-94	-0.0624255
UXT	clu_3809_?	i002	chrX:47652144-47657205	0.00933765	0.00866413	7.14682e-97	9.96266e-94	-0.000673514
UXT	clu_3809_?	i003	chrX:47652144-47657572	0.00259294	0.00238196	7.14682e-97	9.96266e-94	-0.000210986
UXT	clu_3809_?	i004	chrX:47657285-47657572	0.0022929	0.00234143	7.14682e-97	9.96266e-94	4.85309e-05
UXT	clu_3809_?	i005	chrX:47657290-47657572	0.222297	0.265138	7.14682e-97	9.96266e-94	0.0428404
UXT	clu_3809_?	i006	chrX:47657290-47657782	0.00162773	0.00166297	7.14682e-97	9.96266e-94	3.52409e-05
UXT	clu_3809_?	i007	chrX:47657639-47657782	0.0541443	0.0745301	7.14682e-97	9.96266e-94	0.0203858
NT5C3A	clu_44312_?	i001	chr7:33026915-33029629	0.035037	0.0522376	4.29878e-96	4.794e-93	0.0172006
NT5C3A	clu_44312_?	i002	chr7:33026915-33035934	0.371907	0.432635	4.29878e-96	4.794e-93	0.0607281
NT5C3A	clu_44312_?	i003	chr7:33026915-33040872	0.00866514	0.0112386	4.29878e-96	4.794e-93	0.00257344
NT5C3A	clu_44312_?	i004	chr7:33026915-33062568	0.270575	0.131593	4.29878e-96	4.794e-93	-0.138981
NT5C3A	clu_44312_?	i005	chr7:33029709-33035934	0.00500383	0.0118834	4.29878e-96	4.794e-93	0.0068796
NT5C3A	clu_44312_?	i006	chr7:33029714-33035934	0.0132164	0.0163658	4.29878e-96	4.794e-93	0.00314944
NT5C3A	clu_44312_?	i007	chr7:33035985-33040872	0.00559934	0.00803055	4.29878e-96	4.794e-93	0.0024312
NT5C3A	clu_44312_?	i008	chr7:33035988-33040872	0.250294	0.315895	4.29878e-96	4.794e-93	0.0656018
NT5C3A	clu_44312_?	i009	chr7:33035988-33062568	0.0397033	0.0201203	4.29878e-96	4.794e-93	-0.019583
ZBTB8OS	clu_38365_?	i001	chr1:32621941-32627508	0.0013671	0.00145322	5.8189e-88	5.4077e-85	8.61189e-05
ZBTB8OS	clu_38365_?	i002	chr1:32621948-32627508	0.301618	0.277647	5.8189e-88	5.4077e-85	-0.0239714
ZBTB8OS	clu_38365_?	i003	chr1:32621948-32631827	0.00205579	0.00183118	5.8189e-88	5.4077e-85	-0.000224618
ZBTB8OS	clu_38365_?	i004	chr1:32621948-32633645	0.00199227	0.00211392	5.8189e-88	5.4077e-85	0.000121648
ZBTB8OS	clu_38365_?	i005	chr1:32627544-32627777	0.00570418	0.00536796	5.8189e-88	5.4077e-85	-0.00033622
ZBTB8OS	clu_38365_?	i006	chr1:32627544-32631827	0.185663	0.186574	5.8189e-88	5.4077e-85	0.000911285
ZBTB8OS	clu_38365_?	i007	chr1:32627544-32633645	0.134558	0.126855	5.8189e-88	5.4077e-85	-0.0077024
ZBTB8OS	clu_38365_?	i008	chr1:32627544-32633951	0.00321766	0.00273179	5.8189e-88	5.4077e-85	-0.000485872
ZBTB8OS	clu_38365_?	i009	chr1:32627544-32634768	0.00801343	0.00539228	5.8189e-88	5.4077e-85	-0.00262115
ZBTB8OS	clu_38365_?	i010	chr1:32627544-32650433	0.00448367	0.00257537	5.8189e-88	5.4077e-85	-0.0019083
ZBTB8OS	clu_38365_?	i011	chr1:32627865-32633645	0.00249748	0.00286653	5.8189e-88	5.4077e-85	0.000369048
ZBTB8OS	clu_38365_?	i012	chr1:32631879-32632208	0.00165909	0.00194579	5.8189e-88	5.4077e-85	0.000286703
ZBTB8OS	clu_38365_?	i013	chr1:32631879-32633645	0.151691	0.169847	5.8189e-88	5.4077e-85	0.0181561
ZBTB8OS	clu_38365_?	i014	chr1:32633727-32633951	0.138076	0.16374	5.8189e-88	5.4077e-85	0.0256645
ZBTB8OS	clu_38365_?	i015	chr1:32634072-32634768	0.00971988	0.0115278	5.8189e-88	5.4077e-85	0.00180787
ZBTB8OS	clu_38365_?	i016	chr1:32634792-32650402	0.00155726	0.00120109	5.8189e-88	5.4077e-85	-0.000356167
ZBTB8OS	clu_38365_?	i017	chr1:32634792-32650429	0.00523035	0.00383634	5.8189e-88	5.4077e-85	-0.00139401
ZBTB8OS	clu_38365_?	i018	chr1:32634792-32650433	0.0408959	0.0324928	5.8189e-88	5.4077e-85	-0.00840304
MRPL33	clu_11402_?	i001	chr2:27771766-27772674	0.00508092	0.00485105	4.19691e-82	3.34314e-79	-0.000229873
MRPL33	clu_11402_?	i002	chr2:27771799-27772674	0.429994	0.383262	4.19691e-82	3.34314e-79	-0.0467319
MRPL33	clu_11402_?	i003	chr2:27771799-27779433	0.00491778	0.00539728	4.19691e-82	3.34314e-79	0.000479505
MRPL33	clu_11402_?	i004	chr2:27772385-27772674	0.00221868	0.00209434	4.19691e-82	3.34314e-79	-0.00012434
MRPL33	clu_11402_?	i005	chr2:27772692-27774424	0.278941	0.231276	4.19691e-82	3.34314e-79	-0.0476652
MRPL33	clu_11402_?	i006	chr2:27772692-27779433	0.168753	0.185474	4.19691e-82	3.34314e-79	0.0167212
MRPL33	clu_11402_?	i007	chr2:27774530-27779433	0.110095	0.187646	4.19691e-82	3.34314e-79	0.0775507
CLDND1,AC021660.2	clu_59717_?	i001	chr3:98521442-98522849	0.028459	0.0242822	8.87416e-78	6.18529e-75	-0.00417685
CLDND1,AC021660.2	clu_59717_?	i002	chr3:98521442-98532009	0.00118401	0.00166336	8.87416e-78	6.18529e-75	0.000479345
CLDND1,AC021660.2	clu_59717_?	i003	chr3:98521442-98536541	0.00283913	0.00236882	8.87416e-78	6.18529e-75	-0.00047031
CLDND1,AC021660.2	clu_59717_?	i004	chr3:98524417-98536541	0.00343672	0.00335469	8.87416e-78	6.18529e-75	-8.20264e-05
CLDND1,AC021660.2	clu_59717_?	i005	chr3:98525220-98536541	0.00158488	0.00139214	8.87416e-78	6.18529e-75	-0.000192742
CLDND1,AC021660.2	clu_59717_?	i006	chr3:98525231-98532009	0.00592428	0.0184306	8.87416e-78	6.18529e-75	0.0125063
CLDND1,AC021660.2	clu_59717_?	i007	chr3:98525231-98536541	0.00225726	0.00265691	8.87416e-78	6.18529e-75	0.000399657
CLDND1,AC021660.2	clu_59717_?	i008	chr3:98525247-98532009	0.380131	0.435041	8.87416e-78	6.18529e-75	0.0549101
CLDND1,AC021660.2	clu_59717_?	i009	chr3:98525247-98536389	0.00691321	0.00738266	8.87416e-78	6.18529e-75	0.000469457
CLDND1,AC021660.2	clu_59717_?	i010	chr3:98525247-98536541	0.219599	0.151715	8.87416e-78	6.18529e-75	-0.0678846
CLDND1,AC021660.2	clu_59717_?	i011	chr3:98525247-98550418	0.001271	0.00178838	8.87416e-78	6.18529e-75	0.000517377
CLDND1,AC021660.2	clu_59717_?	i012	chr3:98525247-98556113	0.0102918	0.00899012	8.87416e-78	6.18529e-75	-0.00130167
CLDND1,AC021660.2	clu_59717_?	i013	chr3:98525247-98557530	0.00169086	0.00245961	8.87416e-78	6.18529e-75	0.000768755
CLDND1,AC021660.2	clu_59717_?	i014	chr3:98525256-98532009	0.167492	0.195259	8.87416e-78	6.18529e-75	0.0277669
CLDND1,AC021660.2	clu_59717_?	i015	chr3:98525256-98536389	0.00307219	0.00396071	8.87416e-78	6.18529e-75	0.00088852
CLDND1,AC021660.2	clu_59717_?	i016	chr3:98525256-98536541	0.0670087	0.0442213	8.87416e-78	6.18529e-75	-0.0227874
CLDND1,AC021660.2	clu_59717_?	i017	chr3:98525256-98556113	0.00432185	0.00523076	8.87416e-78	6.18529e-75	0.000908903
CLDND1,AC021660.2	clu_59717_?	i018	chr3:98525258-98532009	0.0010115	0.00161554	8.87416e-78	6.18529e-75	0.000604044
CLDND1,AC021660.2	clu_59717_?	i019	chr3:98525334-98532009	0.00652208	0.010669	8.87416e-78	6.18529e-75	0.0041469
CLDND1,AC021660.2	clu_59717_?	i020	chr3:98525334-98536541	0.0013312	0.00120917	8.87416e-78	6.18529e-75	-0.000122028
CLDND1,AC021660.2	clu_59717_?	i021	chr3:98532578-98536389	0.00684671	0.011037	8.87416e-78	6.18529e-75	0.00419024
CLDND1,AC021660.2	clu_59717_?	i022	chr3:98532578-98536541	0.0768112	0.0652724	8.87416e-78	6.18529e-75	-0.0115388
PTGES3	clu_28873_?	i001	chr12:56664800-56666204	0.22165	0.189928	1.46828e-71	9.09683e-69	-0.0317214
PTGES3	clu_28873_?	i002	chr12:56664800-56670275	0.00273868	0.00276177	1.46828e-71	9.09683e-69	2.30863e-05
PTGES3	clu_28873_?	i003	chr12:56666266-56670275	0.423622	0.404667	1.46828e-71	9.09683e-69	-0.0189549
PTGES3	clu_28873_?	i004	chr12:56666266-56671749	0.0167798	0.016114	1.46828e-71	9.09683e-69	-0.00066582
PTGES3	clu_28873_?	i005	chr12:56670364-56671749	0.33521	0.386529	1.46828e-71	9.09683e-69	0.051319
UBE2V1	clu_48192_?	i001	chr20:50084254-50096483	0.00230512	0.00974687	2.90448e-71	1.61954e-68	0.00744175
UBE2V1	clu_48192_?	i002	chr20:50084254-50096672	0.519304	0.633848	2.90448e-71	1.61954e-68	0.114545
UBE2V1	clu_48192_?	i003	chr20:50084254-50113107	0.0503955	0.0370215	2.90448e-71	1.61954e-68	-0.013374
UBE2V1	clu_48192_?	i004	chr20:50096820-50113107	0.423067	0.311556	2.90448e-71	1.61954e-68	-0.111511
UBE2V1	clu_48192_?	i005	chr20:50096820-50115485	0.00492855	0.00782718	2.90448e-71	1.61954e-68	0.00289863
ATOX1	clu_20169_?	i001	chr5:151742959-151746279	0.795322	0.770805	2.89333e-67	1.46666e-64	-0.0245176
ATOX1	clu_20169_?	i002	chr5:151742959-151751704	0.00232063	0.00185521	2.89333e-67	1.46666e-64	-0.000465417
ATOX1	clu_20169_?	i003	chr5:151742959-151758546	0.0070335	0.00391081	2.89333e-67	1.46666e-64	-0.00312268
ATOX1	clu_20169_?	i004	chr5:151746449-151751704	0.113824	0.14611	2.89333e-67	1.46666e-64	0.0322858
ATOX1	clu_20169_?	i005	chr5:151746449-151758546	0.0114143	0.0111979	2.89333e-67	1.46666e-64	-0.000216379
ATOX1	clu_20169_?	i006	chr5:151751779-151753815	0.00120522	0.00148808	2.89333e-67	1.46666e-64	0.000282857
ATOX1	clu_20169_?	i007	chr5:151751779-151758546	0.0676001	0.0635258	2.89333e-67	1.46666e-64	-0.00407432
ATOX1	clu_20169_?	i008	chr5:151753894-151758546	0.00128006	0.00110779	2.89333e-67	1.46666e-64	-0.00017227
COX6B1	clu_23307_?	i001	chr19:35648403-35651233	0.043541	0.0414177	5.12003e-66	2.37911e-63	-0.00212333
COX6B1	clu_23307_?	i002	chr19:35648403-35654571	0.00154489	0.0015329	5.12003e-66	2.37911e-63	-1.19934e-05
COX6B1	clu_23307_?	i003	chr19:35651349-35654571	0.208463	0.24932	5.12003e-66	2.37911e-63	0.0408566
COX6B1	clu_23307_?	i004	chr19:35651349-35658594	0.00627287	0.00593319	5.12003e-66	2.37911e-63	-0.000339678
COX6B1	clu_23307_?	i005	chr19:35654671-35658594	0.740178	0.701796	5.12003e-66	2.37911e-63	-0.0383816
ELOC	clu_16989_?	i001	chr8:73946820-73955647	0.00902953	0.00955289	8.46373e-66	3.63029e-63	0.000523363
ELOC	clu_16989_?	i002	chr8:73946820-73955911	0.762814	0.80784	8.46373e-66	3.63029e-63	0.0450259
ELOC	clu_16989_?	i003	chr8:73946820-73959765	0.00134451	0.00140003	8.46373e-66	3.63029e-63	5.55248e-05
ELOC	clu_16989_?	i004	chr8:73956054-73959765	0.0861656	0.08532	8.46373e-66	3.63029e-63	-0.000845629
ELOC	clu_16989_?	i005	chr8:73956054-73972077	0.00310916	0.00275907	8.46373e-66	3.63029e-63	-0.000350099
ELOC	clu_16989_?	i006	chr8:73956054-73972245	0.00152131	0.00109302	8.46373e-66	3.63029e-63	-0.000428287
ELOC	clu_16989_?	i007	chr8:73959818-73964487	0.00759119	0.00656121	8.46373e-66	3.63029e-63	-0.00102998
ELOC	clu_16989_?	i008	chr8:73959818-73972042	0.00158625	0.00102757	8.46373e-66	3.63029e-63	-0.000558678
ELOC	clu_16989_?	i009	chr8:73959818-73972077	0.085943	0.0550281	8.46373e-66	3.63029e-63	-0.0309149
ELOC	clu_16989_?	i010	chr8:73959818-73972245	0.0234367	0.0181765	8.46373e-66	3.63029e-63	-0.00526015
ELOC	clu_16989_?	i011	chr8:73964625-73972077	0.0112559	0.00723575	8.46373e-66	3.63029e-63	-0.00402011
ELOC	clu_16989_?	i012	chr8:73964625-73972245	0.00405149	0.00261147	8.46373e-66	3.63029e-63	-0.00144003
ELOC	clu_16989_?	i013	chr8:73969673-73972077	0.00215153	0.00139455	8.46373e-66	3.63029e-63	-0.000756981
SKA2	clu_33428_?	i001	chr17:59112345-59119299	0.00569484	0.0162317	2.53282e-64	1.00879e-61	0.0105368
SKA2	clu_33428_?	i002	chr17:59112345-59119319	0.300448	0.386154	2.53282e-64	1.00879e-61	0.0857061
SKA2	clu_33428_?	i003	chr17:59112345-59131281	0.0926856	0.119103	2.53282e-64	1.00879e-61	0.026417
SKA2	clu_33428_?	i004	chr17:59112345-59154956	0.00347367	0.00321324	2.53282e-64	1.00879e-61	-0.000260432
SKA2	clu_33428_?	i005	chr17:59112345-59155131	0.0308328	0.0287439	2.53282e-64	1.00879e-61	-0.00208884
SKA2	clu_33428_?	i006	chr17:59119495-59131281	0.161423	0.148868	2.53282e-64	1.00879e-61	-0.0125547
SKA2	clu_33428_?	i007	chr17:59119495-59155131	0.0100793	0.00747065	2.53282e-64	1.00879e-61	-0.00260862
SKA2	clu_33428_?	i008	chr17:59131367-59154956	0.0168061	0.0123304	2.53282e-64	1.00879e-61	-0.00447572
SKA2	clu_33428_?	i009	chr17:59131367-59155131	0.375883	0.275923	2.53282e-64	1.00879e-61	-0.0999599
SKA2	clu_33428_?	i010	chr17:59154167-59155131	0.00267435	0.00196261	2.53282e-64	1.00879e-61	-0.00071174
NDUFA5	clu_46283_?	i001	chr7:123545676-123550470	0.215448	0.297437	2.09444e-63	7.78574e-61	0.0819884
NDUFA5	clu_46283_?	i002	chr7:123545676-123557404	0.00254798	0.00265673	2.09444e-63	7.78574e-61	0.000108753
NDUFA5	clu_46283_?	i003	chr7:123550586-123557404	0.406418	0.36872	2.09444e-63	7.78574e-61	-0.0376977
NDUFA5	clu_46283_?	i004	chr7:123550586-123557775	0.00245389	0.00231772	2.09444e-63	7.78574e-61	-0.000136166
NDUFA5	clu_46283_?	i005	chr7:123551576-123557404	0.0029685	0.00263479	2.09444e-63	7.78574e-61	-0.000333707
NDUFA5	clu_46283_?	i006	chr7:123557448-123557775	0.370163	0.326234	2.09444e-63	7.78574e-61	-0.0439296
RPL3	clu_5893_?	i001	chr22:39313310-39313634	0.825184	0.789591	3.80839e-63	1.32722e-60	-0.0355933
RPL3	clu_5893_?	i002	chr22:39313310-39314107	0.00709088	0.00644126	3.80839e-63	1.32722e-60	-0.000649616
RPL3	clu_5893_?	i003	chr22:39313729-39314107	0.167725	0.203968	3.80839e-63	1.32722e-60	0.036243
GTF2A2	clu_9876_?	i001	chr15:59639156-59642136	0.00130183	0.00226172	1.32529e-61	4.34693e-59	0.00095989
GTF2A2	clu_9876_?	i002	chr15:59639157-59642136	0.643145	0.727207	1.32529e-61	4.34693e-59	0.0840616
GTF2A2	clu_9876_?	i003	chr15:59639157-59650669	0.00801757	0.0140402	1.32529e-61	4.34693e-59	0.0060226
GTF2A2	clu_9876_?	i004	chr15:59642262-59650669	0.262866	0.208488	1.32529e-61	4.34693e-59	-0.0543785
GTF2A2	clu_9876_?	i005	chr15:59642262-59657406	0.00316068	0.0022144	1.32529e-61	4.34693e-59	-0.000946285
GTF2A2	clu_9876_?	i006	chr15:59652326-59657124	0.00263897	0.00176401	1.32529e-61	4.34693e-59	-0.000874965
GTF2A2	clu_9876_?	i007	chr15:59652326-59657406	0.0774628	0.0431847	1.32529e-61	4.34693e-59	-0.0342781
GTF2A2	clu_9876_?	i008	chr15:59657033-59657406	0.00140656	0.000840284	1.32529e-61	4.34693e-59	-0.000566273
RPLP2	clu_51833_?	i001	chr11:810039-810234	0.244203	0.191966	1.03251e-60	3.19849e-58	-0.0522368
RPLP2	clu_51833_?	i002	chr11:810039-811597	0.0170224	0.015765	1.03251e-60	3.19849e-58	-0.0012574
RPLP2	clu_51833_?	i003	chr11:810357-811597	0.738774	0.792268	1.03251e-60	3.19849e-58	0.0534942
COX7A2	clu_56949_?	i001	chr6:75237988-75240277	0.0013576	0.00142964	2.0528e-60	6.02444e-58	7.20364e-05
COX7A2	clu_56949_?	i002	chr6:75237988-75240301	0.794891	0.757219	2.0528e-60	6.02444e-58	-0.0376713
COX7A2	clu_56949_?	i003	chr6:75237988-75241176	0.00828368	0.00805132	2.0528e-60	6.02444e-58	-0.000232359
COX7A2	clu_56949_?	i004	chr6:75240385-75241123	0.00228233	0.00229321	2.0528e-60	6.02444e-58	1.08844e-05
COX7A2	clu_56949_?	i005	chr6:75240385-75241176	0.193186	0.231007	2.0528e-60	6.02444e-58	0.0378207
CCDC58	clu_60080_?	i001	chr3:122359827-122362968	0.00594652	0.00574521	5.11294e-60	1.42549e-57	-0.000201318
CCDC58	clu_60080_?	i002	chr3:122359919-122362968	0.17873	0.295882	5.11294e-60	1.42549e-57	0.117151
CCDC58	clu_60080_?	i003	chr3:122359919-122368176	0.00281137	0.0041434	5.11294e-60	1.42549e-57	0.00133203
CCDC58	clu_60080_?	i004	chr3:122363027-122365336	0.00499676	0.00687244	5.11294e-60	1.42549e-57	0.00187568
CCDC58	clu_60080_?	i005	chr3:122363027-122368176	0.217339	0.252324	5.11294e-60	1.42549e-57	0.0349856
CCDC58	clu_60080_?	i006	chr3:122363027-122383174	0.00343529	0.00318149	5.11294e-60	1.42549e-57	-0.000253796
CCDC58	clu_60080_?	i007	chr3:122365466-122368176	0.00263227	0.00372935	5.11294e-60	1.42549e-57	0.00109708
CCDC58	clu_60080_?	i008	chr3:122371730-122383174	0.00218077	0.00150566	5.11294e-60	1.42549e-57	-0.000675111
CCDC58	clu_60080_?	i009	chr3:122371800-122372983	0.00786932	0.00842823	5.11294e-60	1.42549e-57	0.000558907
CCDC58	clu_60080_?	i010	chr3:122371800-122383148	0.0197723	0.0159655	5.11294e-60	1.42549e-57	-0.00380672
CCDC58	clu_60080_?	i011	chr3:122371800-122383174	0.541093	0.392463	5.11294e-60	1.42549e-57	-0.14863
CCDC58	clu_60080_?	i012	chr3:122371800-122384211	0.00680664	0.0032369	5.11294e-60	1.42549e-57	-0.00356974
CCDC58	clu_60080_?	i013	chr3:122373022-122383174	0.00638696	0.0065233	5.11294e-60	1.42549e-57	0.000136348
ELOB	clu_48956_?	i001	chr16:2772102-2775451	0.763366	0.716801	3.59775e-59	9.55289e-57	-0.046565
ELOB	clu_48956_?	i002	chr16:2772102-2776993	0.00801797	0.00769631	3.59775e-59	9.55289e-57	-0.000321662
ELOB	clu_48956_?	i003	chr16:2772122-2775451	0.00280359	0.0027335	3.59775e-59	9.55289e-57	-7.00878e-05
ELOB	clu_48956_?	i004	chr16:2775556-2776993	0.225812	0.272769	3.59775e-59	9.55289e-57	0.0469567
MRPL22	clu_20218_?	i001	chr5:154941265-154950803	0.00258282	0.00297179	3.99939e-59	1.01366e-56	0.000388977
MRPL22	clu_20218_?	i002	chr5:154941265-154950821	0.26048	0.135374	3.99939e-59	1.01366e-56	-0.125107
MRPL22	clu_20218_?	i003	chr5:154941265-154956371	0.00890875	0.0050608	3.99939e-59	1.01366e-56	-0.00384795
MRPL22	clu_20218_?	i004	chr5:154941265-154966686	0.00165933	0.00158625	3.99939e-59	1.01366e-56	-7.30827e-05
MRPL22	clu_20218_?	i005	chr5:154950938-154956371	0.0517097	0.0369597	3.99939e-59	1.01366e-56	-0.01475
MRPL22	clu_20218_?	i006	chr5:154960049-154966686	0.674659	0.818048	3.99939e-59	1.01366e-56	0.143389
PFDN5	clu_28581_?	i001	chr12:53295639-53295839	0.0547059	0.0366761	6.66245e-59	1.61521e-56	-0.0180298
PFDN5	clu_28581_?	i002	chr12:53295639-53297850	0.0530265	0.035549	6.66245e-59	1.61521e-56	-0.0174775
PFDN5	clu_28581_?	i003	chr12:53295639-53298045	0.0164664	0.0112854	6.66245e-59	1.61521e-56	-0.00518107
PFDN5	clu_28581_?	i004	chr12:53296275-53297850	0.111051	0.125156	6.66245e-59	1.61521e-56	0.0141045
PFDN5	clu_28581_?	i005	chr12:53297924-53298045	0.76475	0.791334	6.66245e-59	1.61521e-56	0.0265839
RPLP1	clu_10227_?	i001	chr15:69453020-69453647	0.235384	0.255983	2.35585e-58	5.47343e-56	0.0205988
RPLP1	clu_10227_?	i002	chr15:69453020-69455170	0.00780911	0.00666276	2.35585e-58	5.47343e-56	-0.00114634
RPLP1	clu_10227_?	i003	chr15:69453721-69455170	0.756807	0.737354	2.35585e-58	5.47343e-56	-0.0194525
GPATCH11	clu_11546_?	i001	chr2:37084570-37088369	0.339967	0.26214	7.1026e-58	1.58416e-55	-0.0778268
GPATCH11	clu_11546_?	i002	chr2:37084570-37089640	0.00185708	0.00542684	7.1026e-58	1.58416e-55	0.00356975
GPATCH11	clu_11546_?	i003	chr2:37084570-37091916	0.00165081	0.00129635	7.1026e-58	1.58416e-55	-0.000354451
GPATCH11	clu_11546_?	i004	chr2:37084586-37088369	0.00593135	0.00537779	7.1026e-58	1.58416e-55	-0.000553559
GPATCH11	clu_11546_?	i005	chr2:37088440-37089640	0.204507	0.180119	7.1026e-58	1.58416e-55	-0.024388
GPATCH11	clu_11546_?	i006	chr2:37088440-37090681	0.00113299	0.0009054	7.1026e-58	1.58416e-55	-0.000227593
GPATCH11	clu_11546_?	i007	chr2:37088440-37091916	0.0210741	0.0206047	7.1026e-58	1.58416e-55	-0.000469416
GPATCH11	clu_11546_?	i008	chr2:37089866-37090681	0.235465	0.283258	7.1026e-58	1.58416e-55	0.0477921
GPATCH11	clu_11546_?	i009	chr2:37089866-37091916	0.00291403	0.00267961	7.1026e-58	1.58416e-55	-0.000234426
GPATCH11	clu_11546_?	i010	chr2:37090722-37091916	0.185501	0.238193	7.1026e-58	1.58416e-55	0.0526923
SELENOH	clu_52785_?	i001	chr11:57741954-57742117	0.144443	0.178405	7.25566e-54	1.55606e-51	0.0339617
SELENOH	clu_52785_?	i002	chr11:57741954-57742863	0.00181185	0.00176696	7.25566e-54	1.55606e-51	-4.4888e-05
SELENOH	clu_52785_?	i003	chr11:57742184-57742863	0.00128408	0.00125445	7.25566e-54	1.55606e-51	-2.96321e-05
SELENOH	clu_52785_?	i004	chr11:57742204-57742863	0.00146195	0.00140991	7.25566e-54	1.55606e-51	-5.2045e-05
SELENOH	clu_52785_?	i005	chr11:57742227-57742863	0.0135485	0.0129939	7.25566e-54	1.55606e-51	-0.000554641
SELENOH	clu_52785_?	i006	chr11:57742247-57742863	0.83745	0.80417	7.25566e-54	1.55606e-51	-0.0332805
MICOS10,NBL1	clu_37583_?	i001	chr1:19597109-19617258	0.00652473	0.00499543	2.26089e-53	4.66915e-51	-0.0015293
MICOS10,NBL1	clu_37583_?	i002	chr1:19597109-19622100	0.445887	0.34019	2.26089e-53	4.66915e-51	-0.105696
MICOS10,NBL1	clu_37583_?	i003	chr1:19597109-19623474	0.0283789	0.0251238	2.26089e-53	4.66915e-51	-0.00325511
MICOS10,NBL1	clu_37583_?	i004	chr1:19617336-19622100	0.00588796	0.00682072	2.26089e-53	4.66915e-51	0.000932764
MICOS10,NBL1	clu_37583_?	i005	chr1:19622147-19623474	0.513322	0.62287	2.26089e-53	4.66915e-51	0.109548
NDUFV2	clu_42950_?	i001	chr18:9124983-9126831	0.366039	0.406329	1.83803e-51	3.66031e-49	0.0402897
NDUFV2	clu_42950_?	i002	chr18:9124983-9134186	0.00207159	0.00168961	1.83803e-51	3.66031e-49	-0.000381988
NDUFV2	clu_42950_?	i003	chr18:9124996-9126831	0.00499164	0.00566444	1.83803e-51	3.66031e-49	0.000672799
NDUFV2	clu_42950_?	i004	chr18:9126907-9134186	0.626898	0.586317	1.83803e-51	3.66031e-49	-0.0405805
PFDN2	clu_41281_?	i001	chr1:161100853-161102048	0.00225233	0.0103673	2.86898e-51	5.51636e-49	0.00811493
PFDN2	clu_41281_?	i002	chr1:161100859-161102048	0.590926	0.68907	2.86898e-51	5.51636e-49	0.0981434
PFDN2	clu_41281_?	i003	chr1:161100859-161117952	0.0118059	0.0147446	2.86898e-51	5.51636e-49	0.0029387
PFDN2	clu_41281_?	i004	chr1:161102375-161117952	0.393113	0.282892	2.86898e-51	5.51636e-49	-0.110222
PFDN2	clu_41281_?	i005	chr1:161110612-161117952	0.00190208	0.00292652	2.86898e-51	5.51636e-49	0.00102444
RPL10	clu_4837_?	i001	chrX:154399941-154400464	0.0447324	0.0607179	2.39397e-50	4.44959e-48	0.0159855
RPL10	clu_4837_?	i002	chrX:154399941-154400702	0.00703554	0.00767628	2.39397e-50	4.44959e-48	0.000640744
RPL10	clu_4837_?	i003	chrX:154400626-154400702	0.948232	0.931606	2.39397e-50	4.44959e-48	-0.0166263
RABGAP1L	clu_41581_?	i001	chr1:174811960-174877392	0.00368355	0.00242781	8.93751e-50	1.6076e-47	-0.00125574
RABGAP1L	clu_41581_?	i002	chr1:174811960-174957457	0.74539	0.492555	8.93751e-50	1.6076e-47	-0.252835
RABGAP1L	clu_41581_?	i003	chr1:174874506-174877392	0.0367444	0.0817795	8.93751e-50	1.6076e-47	0.0450351
RABGAP1L	clu_41581_?	i004	chr1:174874506-174957457	0.105025	0.198963	8.93751e-50	1.6076e-47	0.0939382
RABGAP1L	clu_41581_?	i005	chr1:174877605-174957457	0.109157	0.224275	8.93751e-50	1.6076e-47	0.115118
PSMB3	clu_32312_?	i001	chr17:38755990-38760431	0.0213439	0.0291974	5.9971e-49	1.045e-46	0.00785344
PSMB3	clu_32312_?	i002	chr17:38755990-38762411	0.0163354	0.0166531	5.9971e-49	1.045e-46	0.000317748
PSMB3	clu_32312_?	i003	chr17:38760571-38762411	0.00124877	0.00137421	5.9971e-49	1.045e-46	0.000125444
PSMB3	clu_32312_?	i004	chr17:38760608-38762411	0.443938	0.470852	5.9971e-49	1.045e-46	0.0269146
PSMB3	clu_32312_?	i005	chr17:38760608-38764119	0.00139115	0.00129331	5.9971e-49	1.045e-46	-9.78425e-05
PSMB3	clu_32312_?	i006	chr17:38762505-38764119	0.515743	0.48063	5.9971e-49	1.045e-46	-0.0351134
ANAPC16	clu_7627_?	i001	chr10:72216072-72220048	0.00219861	0.00259351	1.28507e-48	2.17138e-46	0.000394902
ANAPC16	clu_7627_?	i002	chr10:72216072-72220054	0.137036	0.10385	1.28507e-48	2.17138e-46	-0.0331857
ANAPC16	clu_7627_?	i003	chr10:72216072-72220060	0.00721704	0.00482234	1.28507e-48	2.17138e-46	-0.0023947
ANAPC16	clu_7627_?	i004	chr10:72216072-72223888	0.0261818	0.0189257	1.28507e-48	2.17138e-46	-0.00725611
ANAPC16	clu_7627_?	i005	chr10:72216072-72230366	0.0102768	0.00975185	1.28507e-48	2.17138e-46	-0.000524934
ANAPC16	clu_7627_?	i006	chr10:72216138-72220054	0.40603	0.344818	1.28507e-48	2.17138e-46	-0.0612119
ANAPC16	clu_7627_?	i007	chr10:72216138-72220060	0.0074224	0.00740914	1.28507e-48	2.17138e-46	-1.32632e-05
ANAPC16	clu_7627_?	i008	chr10:72216138-72223888	0.0450584	0.0351881	1.28507e-48	2.17138e-46	-0.00987026
ANAPC16	clu_7627_?	i009	chr10:72216138-72230366	0.0113151	0.0122835	1.28507e-48	2.17138e-46	0.000968314
ANAPC16	clu_7627_?	i010	chr10:72220379-72223888	0.0349901	0.0374944	1.28507e-48	2.17138e-46	0.00250422
ANAPC16	clu_7627_?	i011	chr10:72220379-72230366	0.00207241	0.00281366	1.28507e-48	2.17138e-46	0.000741253
ANAPC16	clu_7627_?	i012	chr10:72224056-72230366	0.0435928	0.0590967	1.28507e-48	2.17138e-46	0.0155039
ANAPC16	clu_7627_?	i013	chr10:72224056-72233001	0.00233106	0.00314658	1.28507e-48	2.17138e-46	0.000815517
ANAPC16	clu_7627_?	i014	chr10:72230440-72233001	0.264278	0.357806	1.28507e-48	2.17138e-46	0.0935288
FXR1	clu_60962_?	i001	chr3:180912736-180933334	0.6557	0.577013	3.05889e-48	5.01659e-46	-0.0786864
FXR1	clu_60962_?	i002	chr3:180912736-180947865	0.00229044	0.00174726	3.05889e-48	5.01659e-46	-0.000543183
FXR1	clu_60962_?	i003	chr3:180914995-180933334	0.00466097	0.00569692	3.05889e-48	5.01659e-46	0.00103595
FXR1	clu_60962_?	i004	chr3:180935231-180947865	0.337349	0.415542	3.05889e-48	5.01659e-46	0.0781936
MX2	clu_546_?	i001	chr21:41362055-41363269	0.0337002	0.0551926	9.43333e-47	1.50286e-44	0.0214923
MX2	clu_546_?	i002	chr21:41362055-41366859	0.00316669	0.00499783	9.43333e-47	1.50286e-44	0.00183114
MX2	clu_546_?	i003	chr21:41362055-41367335	0.00263591	0.00495256	9.43333e-47	1.50286e-44	0.00231665
MX2	clu_546_?	i004	chr21:41362055-41367338	0.00454821	0.00834364	9.43333e-47	1.50286e-44	0.00379544
MX2	clu_546_?	i005	chr21:41362055-41372934	0.00624642	0.00828103	9.43333e-47	1.50286e-44	0.00203461
MX2	clu_546_?	i006	chr21:41362055-41376836	0.763888	0.803041	9.43333e-47	1.50286e-44	0.0391526
MX2	clu_546_?	i007	chr21:41363389-41364404	0.00230227	0.00352341	9.43333e-47	1.50286e-44	0.00122114
MX2	clu_546_?	i008	chr21:41363389-41376836	0.00914956	0.0143753	9.43333e-47	1.50286e-44	0.00522571
MX2	clu_546_?	i009	chr21:41363391-41376836	0.00178941	0.00165423	9.43333e-47	1.50286e-44	-0.000135183
MX2	clu_546_?	i010	chr21:41363416-41376836	0.00256334	0.00383828	9.43333e-47	1.50286e-44	0.00127494
MX2	clu_546_?	i011	chr21:41367208-41376836	0.00203392	0.00270141	9.43333e-47	1.50286e-44	0.000667494
MX2	clu_546_?	i012	chr21:41367449-41376836	0.00178293	0.00331443	9.43333e-47	1.50286e-44	0.0015315
MX2	clu_546_?	i013	chr21:41370117-41376836	0.00428683	0.00215202	9.43333e-47	1.50286e-44	-0.00213481
MX2	clu_546_?	i014	chr21:41370395-41376836	0.0295599	0.0131285	9.43333e-47	1.50286e-44	-0.0164314
MX2	clu_546_?	i015	chr21:41370645-41376836	0.117369	0.0477475	9.43333e-47	1.50286e-44	-0.0696211
MX2	clu_546_?	i016	chr21:41372999-41376836	0.00739985	0.00851457	9.43333e-47	1.50286e-44	0.00111472
MX2	clu_546_?	i017	chr21:41374127-41376836	0.00757759	0.0142418	9.43333e-47	1.50286e-44	0.00666426
MTDH	clu_17223_?	i001	chr8:97691188-97699754	0.220501	0.261896	1.58292e-46	2.45176e-44	0.0413944
MTDH	clu_17223_?	i002	chr8:97691188-97706626	0.0695743	0.0649637	1.58292e-46	2.45176e-44	-0.00461061
MTDH	clu_17223_?	i003	chr8:97696293-97699754	0.00466147	0.00571054	1.58292e-46	2.45176e-44	0.00104907
MTDH	clu_17223_?	i004	chr8:97699852-97706626	0.705263	0.66743	1.58292e-46	2.45176e-44	-0.0378329
PUS7L	clu_28188_?	i001	chr12:43746238-43748450	0.244223	0.230984	1.90368e-45	2.8689e-43	-0.0132392
PUS7L	clu_28188_?	i002	chr12:43746238-43754336	0.00335599	0.00322019	1.90368e-45	2.8689e-43	-0.000135796
PUS7L	clu_28188_?	i003	chr12:43748609-43754336	0.482215	0.559478	1.90368e-45	2.8689e-43	0.0772627
PUS7L	clu_28188_?	i004	chr12:43748609-43755217	0.0722487	0.0529383	1.90368e-45	2.8689e-43	-0.0193104
PUS7L	clu_28188_?	i005	chr12:43748609-43758701	0.00228952	0.003069	1.90368e-45	2.8689e-43	0.000779479
PUS7L	clu_28188_?	i006	chr12:43748609-43758730	0.018999	0.0137451	1.90368e-45	2.8689e-43	-0.00525385
PUS7L	clu_28188_?	i007	chr12:43755261-43758286	0.00297746	0.0105764	1.90368e-45	2.8689e-43	0.00759896
PUS7L	clu_28188_?	i008	chr12:43755261-43758693	0.00288835	0.00322813	1.90368e-45	2.8689e-43	0.000339784
PUS7L	clu_28188_?	i009	chr12:43755261-43758701	0.036406	0.0302166	1.90368e-45	2.8689e-43	-0.00618937
PUS7L	clu_28188_?	i010	chr12:43755261-43758730	0.134397	0.0925443	1.90368e-45	2.8689e-43	-0.0418523
EIF3L	clu_5803_?	i001	chr22:37878171-37886765	0.209406	0.252353	2.10673e-44	3.09135e-42	0.0429469
EIF3L	clu_5803_?	i002	chr22:37878171-37888426	0.0120337	0.0113801	2.10673e-44	3.09135e-42	-0.000653688
EIF3L	clu_5803_?	i003	chr22:37886845-37888426	0.776625	0.734437	2.10673e-44	3.09135e-42	-0.042188
EIF3L	clu_5803_?	i004	chr22:37887071-37888426	0.00193576	0.00183061	2.10673e-44	3.09135e-42	-0.000105155
PSMB9	clu_56044_?	i001	chr6:32858134-32858364	0.132715	0.168601	9.18691e-44	1.31349e-41	0.0358861
PSMB9	clu_56044_?	i002	chr6:32858134-32859405	0.00144339	0.00158422	9.18691e-44	1.31349e-41	0.000140832
PSMB9	clu_56044_?	i003	chr6:32858505-32859405	0.865842	0.829815	9.18691e-44	1.31349e-41	-0.0360269
PMM2	clu_49140_?	i001	chr16:8801910-8804767	0.215046	0.260317	2.33384e-43	3.25338e-41	0.0452715
PMM2	clu_49140_?	i002	chr16:8801910-8804797	0.00142594	0.001271	2.33384e-43	3.25338e-41	-0.000154943
PMM2	clu_49140_?	i003	chr16:8801910-8806316	0.0101705	0.00763962	2.33384e-43	3.25338e-41	-0.00253087
PMM2	clu_49140_?	i004	chr16:8801910-8811079	0.00172687	0.00137907	2.33384e-43	3.25338e-41	-0.000347795
PMM2	clu_49140_?	i005	chr16:8802389-8804767	0.00215282	0.00328255	2.33384e-43	3.25338e-41	0.00112974
PMM2	clu_49140_?	i006	chr16:8804843-8806316	0.451679	0.452829	2.33384e-43	3.25338e-41	0.00114984
PMM2	clu_49140_?	i007	chr16:8806407-8811079	0.306473	0.262233	2.33384e-43	3.25338e-41	-0.0442403
PMM2	clu_49140_?	i008	chr16:8806407-8811638	0.00109108	0.00141716	2.33384e-43	3.25338e-41	0.000326088
PMM2	clu_49140_?	i009	chr16:8811178-8811638	0.00806796	0.00800853	2.33384e-43	3.25338e-41	-5.94328e-05
PMM2	clu_49140_?	i010	chr16:8811178-8811642	0.00216739	0.00162356	2.33384e-43	3.25338e-41	-0.000543823
PDCD10	clu_60774_?	i001	chr3:167720230-167734806	0.00231295	0.00198929	1.15078e-41	1.56505e-39	-0.000323665
PDCD10	clu_60774_?	i002	chr3:167720273-167725401	0.134782	0.193187	1.15078e-41	1.56505e-39	0.0584057
PDCD10	clu_60774_?	i003	chr3:167720273-167734214	0.0155735	0.0210037	1.15078e-41	1.56505e-39	0.00543016
PDCD10	clu_60774_?	i004	chr3:167720273-167734432	0.0204102	0.0180471	1.15078e-41	1.56505e-39	-0.00236305
PDCD10	clu_60774_?	i005	chr3:167720273-167734459	0.0371251	0.0315768	1.15078e-41	1.56505e-39	-0.00554828
PDCD10	clu_60774_?	i006	chr3:167720273-167734806	0.437185	0.454496	1.15078e-41	1.56505e-39	0.0173114
PDCD10	clu_60774_?	i007	chr3:167720273-167734837	0.00292	0.00351967	1.15078e-41	1.56505e-39	0.000599662
PDCD10	clu_60774_?	i008	chr3:167725473-167734214	0.00309369	0.00421698	1.15078e-41	1.56505e-39	0.00112329
PDCD10	clu_60774_?	i009	chr3:167725473-167734432	0.00966857	0.00763294	1.15078e-41	1.56505e-39	-0.00203564
PDCD10	clu_60774_?	i010	chr3:167725473-167734459	0.0197827	0.0155182	1.15078e-41	1.56505e-39	-0.00426443
PDCD10	clu_60774_?	i011	chr3:167725473-167734806	0.269388	0.211348	1.15078e-41	1.56505e-39	-0.0580396
PDCD10	clu_60774_?	i012	chr3:167734345-167734806	0.0242612	0.0190315	1.15078e-41	1.56505e-39	-0.00522967
PDCD10	clu_60774_?	i013	chr3:167734350-167734806	0.0234976	0.0184317	1.15078e-41	1.56505e-39	-0.00506586
PSME2	clu_25409_?	i001	chr14:24143671-24143975	0.639896	0.61307	2.36309e-41	3.13729e-39	-0.0268257
PSME2	clu_25409_?	i002	chr14:24143671-24144192	0.00269821	0.0027396	2.36309e-41	3.13729e-39	4.13902e-05
PSME2	clu_25409_?	i003	chr14:24144029-24144192	0.357406	0.38419	2.36309e-41	3.13729e-39	0.0267843
LSM14A,KIAA0355	clu_23198_?	i001	chr19:34221738-34226408	0.0544045	0.0678882	2.53366e-41	3.28551e-39	0.0134837
LSM14A,KIAA0355	clu_23198_?	i002	chr19:34221738-34227365	0.13047	0.28952	2.53366e-41	3.28551e-39	0.15905
LSM14A,KIAA0355	clu_23198_?	i003	chr19:34221738-34227369	0.00561094	0.00770135	2.53366e-41	3.28551e-39	0.00209041
LSM14A,KIAA0355	clu_23198_?	i004	chr19:34221738-34299679	0.00440259	0.00210881	2.53366e-41	3.28551e-39	-0.00229378
LSM14A,KIAA0355	clu_23198_?	i005	chr19:34226464-34227365	0.0685459	0.105635	2.53366e-41	3.28551e-39	0.037089
LSM14A,KIAA0355	clu_23198_?	i006	chr19:34254614-34264865	0.00236073	0.00298379	2.53366e-41	3.28551e-39	0.000623062
LSM14A,KIAA0355	clu_23198_?	i007	chr19:34254614-34265442	0.00251681	0.00249722	2.53366e-41	3.28551e-39	-1.95911e-05
LSM14A,KIAA0355	clu_23198_?	i008	chr19:34254614-34285150	0.0123918	0.0169611	2.53366e-41	3.28551e-39	0.0045693
LSM14A,KIAA0355	clu_23198_?	i009	chr19:34254614-34299679	0.682832	0.457898	2.53366e-41	3.28551e-39	-0.224934
LSM14A,KIAA0355	clu_23198_?	i010	chr19:34264925-34299679	0.001469	0.00268811	2.53366e-41	3.28551e-39	0.0012191
LSM14A,KIAA0355	clu_23198_?	i011	chr19:34265621-34299679	0.00558911	0.00977526	2.53366e-41	3.28551e-39	0.00418615
LSM14A,KIAA0355	clu_23198_?	i012	chr19:34285273-34299679	0.0143989	0.0150882	2.53366e-41	3.28551e-39	0.000689377
LSM14A,KIAA0355	clu_23198_?	i013	chr19:34287476-34299679	0.00161252	0.00203521	2.53366e-41	3.28551e-39	0.00042269
LSM14A,KIAA0355	clu_23198_?	i014	chr19:34299152-34299679	0.0133959	0.0172197	2.53366e-41	3.28551e-39	0.00382375
UBXN1	clu_53021_?	i001	chr11:62676639-62676813	0.880545	0.838764	3.64669e-41	4.62135e-39	-0.0417813
UBXN1	clu_53021_?	i002	chr11:62676639-62677518	0.0134004	0.0139849	3.64669e-41	4.62135e-39	0.000584482
UBXN1	clu_53021_?	i003	chr11:62677005-62677518	0.106055	0.147251	3.64669e-41	4.62135e-39	0.0411968
ANP32E	clu_40478_?	i001	chr1:150226795-150229072	0.309477	0.266115	5.8767e-41	7.28188e-39	-0.0433624
ANP32E	clu_40478_?	i002	chr1:150226795-150230571	0.00270313	0.00248826	5.8767e-41	7.28188e-39	-0.00021487
ANP32E	clu_40478_?	i003	chr1:150229237-150230571	0.350437	0.368599	5.8767e-41	7.28188e-39	0.0181618
ANP32E	clu_40478_?	i004	chr1:150229237-150231777	0.0015023	0.00141756	5.8767e-41	7.28188e-39	-8.47446e-05
ANP32E	clu_40478_?	i005	chr1:150230693-150231777	0.214722	0.226022	5.8767e-41	7.28188e-39	0.0113
ANP32E	clu_40478_?	i006	chr1:150230693-150235733	0.00601121	0.00708797	5.8767e-41	7.28188e-39	0.00107675
ANP32E	clu_40478_?	i007	chr1:150231926-150234579	0.00148348	0.00132095	5.8767e-41	7.28188e-39	-0.000162527
ANP32E	clu_40478_?	i008	chr1:150231926-150235733	0.113664	0.12695	5.8767e-41	7.28188e-39	0.013286
TMEM126B	clu_54183_?	i001	chr11:85628688-85629132	0.033792	0.0331571	1.14991e-40	1.39389e-38	-0.000634868
TMEM126B	clu_54183_?	i002	chr11:85628688-85631116	0.00265507	0.00364638	1.14991e-40	1.39389e-38	0.000991306
TMEM126B	clu_54183_?	i003	chr11:85628688-85631145	0.165114	0.199297	1.14991e-40	1.39389e-38	0.0341827
TMEM126B	clu_54183_?	i004	chr11:85628688-85631244	0.00280439	0.00124487	1.14991e-40	1.39389e-38	-0.00155952
TMEM126B	clu_54183_?	i005	chr11:85628688-85631687	0.543581	0.417904	1.14991e-40	1.39389e-38	-0.125677
TMEM126B	clu_54183_?	i006	chr11:85628688-85634086	0.0034987	0.00396979	1.14991e-40	1.39389e-38	0.00047109
TMEM126B	clu_54183_?	i007	chr11:85629262-85631145	0.00416065	0.00756141	1.14991e-40	1.39389e-38	0.00340076
TMEM126B	clu_54183_?	i008	chr11:85629262-85631687	0.00860961	0.00737309	1.14991e-40	1.39389e-38	-0.00123651
TMEM126B	clu_54183_?	i009	chr11:85631316-85631687	0.175471	0.192309	1.14991e-40	1.39389e-38	0.0168378
TMEM126B	clu_54183_?	i010	chr11:85631808-85631914	0.00124478	0.00178509	1.14991e-40	1.39389e-38	0.000540302
TMEM126B	clu_54183_?	i011	chr11:85631808-85634086	0.0590688	0.131752	1.14991e-40	1.39389e-38	0.0726835
MTIF3	clu_15243_?	i001	chr13:27435780-27437116	0.00481657	0.00525405	3.26799e-40	3.87708e-38	0.000437479
MTIF3	clu_15243_?	i002	chr13:27435893-27437116	0.188915	0.269853	3.26799e-40	3.87708e-38	0.0809378
MTIF3	clu_15243_?	i003	chr13:27435893-27445088	0.00205824	0.00156772	3.26799e-40	3.87708e-38	-0.000490518
MTIF3	clu_15243_?	i004	chr13:27440449-27441017	0.0370954	0.0475573	3.26799e-40	3.87708e-38	0.010462
MTIF3	clu_15243_?	i005	chr13:27440449-27445088	0.364069	0.307694	3.26799e-40	3.87708e-38	-0.0563744
MTIF3	clu_15243_?	i006	chr13:27440449-27450142	0.00213837	0.00160342	3.26799e-40	3.87708e-38	-0.00053494
MTIF3	clu_15243_?	i007	chr13:27440449-27450509	0.00644557	0.00481306	3.26799e-40	3.87708e-38	-0.00163251
MTIF3	clu_15243_?	i008	chr13:27441077-27445088	0.0168036	0.0225082	3.26799e-40	3.87708e-38	0.0057046
MTIF3	clu_15243_?	i009	chr13:27445137-27449852	0.000980838	0.00162402	3.26799e-40	3.87708e-38	0.00064318
MTIF3	clu_15243_?	i010	chr13:27445137-27450064	0.0142897	0.0138391	3.26799e-40	3.87708e-38	-0.000450546
MTIF3	clu_15243_?	i011	chr13:27445137-27450142	0.0155267	0.013608	3.26799e-40	3.87708e-38	-0.00191867
MTIF3	clu_15243_?	i012	chr13:27445137-27450509	0.0229899	0.0233039	3.26799e-40	3.87708e-38	0.000313994
MTIF3	clu_15243_?	i013	chr13:27445156-27449852	0.00714948	0.00918614	3.26799e-40	3.87708e-38	0.00203666
MTIF3	clu_15243_?	i014	chr13:27445156-27450064	0.0610593	0.0534395	3.26799e-40	3.87708e-38	-0.00761972
MTIF3	clu_15243_?	i015	chr13:27445156-27450142	0.0851192	0.0622508	3.26799e-40	3.87708e-38	-0.0228684
MTIF3	clu_15243_?	i016	chr13:27445156-27450509	0.170543	0.161897	3.26799e-40	3.87708e-38	-0.00864602
LARP1B	clu_36261_?	i001	chr4:128061225-128074460	0.0232292	0.0568364	3.50529e-40	4.07197e-38	0.0336072
LARP1B	clu_36261_?	i002	chr4:128061349-128074460	0.0222791	0.0178456	3.50529e-40	4.07197e-38	-0.00443344
LARP1B	clu_36261_?	i003	chr4:128061401-128074460	0.630061	0.467995	3.50529e-40	4.07197e-38	-0.162066
LARP1B	clu_36261_?	i004	chr4:128062219-128074460	0.324431	0.457323	3.50529e-40	4.07197e-38	0.132892
RBIS	clu_17077_?	i001	chr8:85214631-85214921	0.62119	0.579516	1.1186e-39	1.27293e-37	-0.0416741
RBIS	clu_17077_?	i002	chr8:85214631-85217386	0.083501	0.061397	1.1186e-39	1.27293e-37	-0.022104
RBIS	clu_17077_?	i003	chr8:85215037-85217386	0.295309	0.359087	1.1186e-39	1.27293e-37	0.0637781
SNU13	clu_6152_?	i001	chr22:41667009-41680244	0.00638196	0.00816902	1.6931e-39	1.88815e-37	0.00178707
SNU13	clu_6152_?	i002	chr22:41675195-41680244	0.556977	0.700868	1.6931e-39	1.88815e-37	0.143892
SNU13	clu_6152_?	i003	chr22:41675195-41688794	0.0023177	0.00301473	1.6931e-39	1.88815e-37	0.000697033
SNU13	clu_6152_?	i004	chr22:41677132-41680244	0.0190937	0.0146241	1.6931e-39	1.88815e-37	-0.00446953
SNU13	clu_6152_?	i005	chr22:41680364-41682356	0.0555908	0.0347799	1.6931e-39	1.88815e-37	-0.0208108
SNU13	clu_6152_?	i006	chr22:41680364-41688794	0.348701	0.231865	1.6931e-39	1.88815e-37	-0.116836
SNU13	clu_6152_?	i007	chr22:41681559-41682356	0.00443651	0.00239739	1.6931e-39	1.88815e-37	-0.00203913
SNU13	clu_6152_?	i008	chr22:41681559-41688794	0.00177984	0.002185	1.6931e-39	1.88815e-37	0.000405159
SNU13	clu_6152_?	i009	chr22:41682587-41688794	0.00281111	0.00136774	1.6931e-39	1.88815e-37	-0.00144337
SNU13	clu_6152_?	i010	chr22:41688327-41688794	0.00191063	0.000728775	1.6931e-39	1.88815e-37	-0.00118185
MS4A1	clu_52843_?	i001	chr11:60462485-60466998	0.0108041	0.0105122	1.72851e-39	1.88984e-37	-0.00029189
MS4A1	clu_52843_?	i002	chr11:60464344-60465921	0.100094	0.130953	1.72851e-39	1.88984e-37	0.0308589
MS4A1	clu_52843_?	i003	chr11:60464344-60466959	0.0014904	0.00144037	1.72851e-39	1.88984e-37	-5.00234e-05
MS4A1	clu_52843_?	i004	chr11:60464344-60466998	0.00327477	0.00316244	1.72851e-39	1.88984e-37	-0.000112329
MS4A1	clu_52843_?	i005	chr11:60466157-60466959	0.868228	0.838377	1.72851e-39	1.88984e-37	-0.0298508
MS4A1	clu_52843_?	i006	chr11:60466157-60466998	0.0161091	0.0155553	1.72851e-39	1.88984e-37	-0.000553842
DNAJC21	clu_18288_?	i001	chr5:34935833-34936144	0.366095	0.432304	3.58075e-39	3.83966e-37	0.0662091
DNAJC21	clu_18288_?	i002	chr5:34935833-34937326	0.00260912	0.00235328	3.58075e-39	3.83966e-37	-0.000255834
DNAJC21	clu_18288_?	i003	chr5:34936266-34937326	0.623866	0.558662	3.58075e-39	3.83966e-37	-0.0652034
DNAJC21	clu_18288_?	i004	chr5:34936266-34937330	0.00743002	0.00668017	3.58075e-39	3.83966e-37	-0.000749849
ZFAS1	clu_48140_?	i001	chr20:49279208-49280485	0.102041	0.119202	3.85322e-39	4.05388e-37	0.0171611
ZFAS1	clu_48140_?	i002	chr20:49279208-49289045	0.104139	0.0795995	3.85322e-39	4.05388e-37	-0.0245398
ZFAS1	clu_48140_?	i003	chr20:49280570-49280903	0.114269	0.142144	3.85322e-39	4.05388e-37	0.027875
ZFAS1	clu_48140_?	i004	chr20:49280570-49289045	0.371431	0.33807	3.85322e-39	4.05388e-37	-0.0333609
ZFAS1	clu_48140_?	i005	chr20:49280964-49289045	0.304831	0.31684	3.85322e-39	4.05388e-37	0.0120094
ZFAS1	clu_48140_?	i006	chr20:49281818-49289045	0.0032899	0.00414517	3.85322e-39	4.05388e-37	0.000855273
MRPS21	clu_40496_?	i001	chr1:150293898-150294335	0.27964	0.202897	4.25095e-39	4.3895e-37	-0.0767433
MRPS21	clu_40496_?	i002	chr1:150293898-150308048	0.0182566	0.0155698	4.25095e-39	4.3895e-37	-0.00268674
MRPS21	clu_40496_?	i003	chr1:150294449-150308048	0.700933	0.780284	4.25095e-39	4.3895e-37	0.0793509
MRPS21	clu_40496_?	i004	chr1:150302524-150308048	0.00117007	0.00124926	4.25095e-39	4.3895e-37	7.91921e-05
SCO2,TYMP	clu_6539_?	i001	chr22:50525918-50526001	0.819876	0.780632	8.6807e-39	8.80065e-37	-0.0392446
SCO2,TYMP	clu_6539_?	i002	chr22:50525918-50526004	0.00348126	0.00283656	8.6807e-39	8.80065e-37	-0.000644698
SCO2,TYMP	clu_6539_?	i003	chr22:50525918-50526246	0.00372949	0.00348491	8.6807e-39	8.80065e-37	-0.000244581
SCO2,TYMP	clu_6539_?	i004	chr22:50526141-50526246	0.171206	0.210944	8.6807e-39	8.80065e-37	0.0397379
SCO2,TYMP	clu_6539_?	i005	chr22:50526156-50526246	0.00170706	0.00210301	8.6807e-39	8.80065e-37	0.000395951
CHMP4A	clu_25463_?	i001	chr14:24210483-24210654	0.320208	0.421952	8.99617e-39	8.95762e-37	0.101745
CHMP4A	clu_25463_?	i002	chr14:24210483-24211415	0.00154004	0.0014455	8.99617e-39	8.95762e-37	-9.45461e-05
CHMP4A	clu_25463_?	i003	chr14:24210483-24213409	0.00246919	0.00285347	8.99617e-39	8.95762e-37	0.000384275
CHMP4A	clu_25463_?	i004	chr14:24210768-24211415	0.108512	0.145171	8.99617e-39	8.95762e-37	0.0366594
CHMP4A	clu_25463_?	i005	chr14:24210768-24213409	0.00482106	0.00368574	8.99617e-39	8.95762e-37	-0.00113532
CHMP4A	clu_25463_?	i006	chr14:24211829-24212766	0.00187421	0.00141219	8.99617e-39	8.95762e-37	-0.000462017
CHMP4A	clu_25463_?	i007	chr14:24211829-24213409	0.558666	0.422036	8.99617e-39	8.95762e-37	-0.13663
CHMP4A	clu_25463_?	i008	chr14:24211829-24213994	0.00190992	0.00144326	8.99617e-39	8.95762e-37	-0.000466667
LGALS1	clu_5753_?	i001	chr22:37677065-37678483	0.0415883	0.0581767	1.39804e-38	1.36763e-36	0.0165884
LGALS1	clu_5753_?	i002	chr22:37677065-37679603	0.0161286	0.0139523	1.39804e-38	1.36763e-36	-0.0021763
LGALS1	clu_5753_?	i003	chr22:37678654-37679603	0.942283	0.927871	1.39804e-38	1.36763e-36	-0.0144121
KTN1	clu_25939_?	i001	chr14:55580354-55601757	0.0391274	0.0667041	6.91833e-37	6.65114e-35	0.0275767
KTN1	clu_25939_?	i002	chr14:55580354-55612019	0.709014	0.625491	6.91833e-37	6.65114e-35	-0.0835234
KTN1	clu_25939_?	i003	chr14:55580354-55612028	0.00465011	0.00426024	6.91833e-37	6.65114e-35	-0.000389866
KTN1	clu_25939_?	i004	chr14:55589031-55612019	0.00655317	0.0091339	6.91833e-37	6.65114e-35	0.00258073
KTN1	clu_25939_?	i005	chr14:55601880-55612019	0.240655	0.294411	6.91833e-37	6.65114e-35	0.0537558
NCOA7	clu_57543_?	i001	chr6:125781287-125786137	0.00295751	0.00405057	7.46643e-37	7.05641e-35	0.00109306
NCOA7	clu_57543_?	i002	chr6:125781371-125786137	0.0927519	0.144782	7.46643e-37	7.05641e-35	0.0520297
NCOA7	clu_57543_?	i003	chr6:125781371-125815291	0.0049297	0.00625651	7.46643e-37	7.05641e-35	0.0013268
NCOA7	clu_57543_?	i004	chr6:125786213-125788726	0.0260139	0.0386133	7.46643e-37	7.05641e-35	0.0125993
NCOA7	clu_57543_?	i005	chr6:125786213-125796680	0.00654387	0.0100659	7.46643e-37	7.05641e-35	0.00352207
NCOA7	clu_57543_?	i006	chr6:125786213-125815291	0.108293	0.137467	7.46643e-37	7.05641e-35	0.0291736
NCOA7	clu_57543_?	i007	chr6:125791063-125815291	0.0217462	0.0218943	7.46643e-37	7.05641e-35	0.000148154
NCOA7	clu_57543_?	i008	chr6:125791067-125796680	0.0383821	0.0352167	7.46643e-37	7.05641e-35	-0.00316547
NCOA7	clu_57543_?	i009	chr6:125791067-125815291	0.625792	0.514508	7.46643e-37	7.05641e-35	-0.111285
NCOA7	clu_57543_?	i010	chr6:125791194-125815291	0.0104471	0.0109999	7.46643e-37	7.05641e-35	0.000552757
NCOA7	clu_57543_?	i011	chr6:125796797-125815291	0.0537489	0.0664091	7.46643e-37	7.05641e-35	0.0126603
NCOA7	clu_57543_?	i012	chr6:125803709-125815291	0.00398334	0.0040865	7.46643e-37	7.05641e-35	0.00010316
NCOA7	clu_57543_?	i013	chr6:125814882-125815291	0.00441005	0.00565132	7.46643e-37	7.05641e-35	0.00124128
MLEC	clu_30307_?	i001	chr12:120694269-120694824	0.225275	0.269711	1.27711e-36	1.18686e-34	0.0444361
MLEC	clu_30307_?	i002	chr12:120694269-120696316	0.00272468	0.00266419	1.27711e-36	1.18686e-34	-6.04921e-05
MLEC	clu_30307_?	i003	chr12:120695000-120695095	0.500842	0.447115	1.27711e-36	1.18686e-34	-0.0537276
MLEC	clu_30307_?	i004	chr12:120695000-120696316	0.0056487	0.00575963	1.27711e-36	1.18686e-34	0.000110927
MLEC	clu_30307_?	i005	chr12:120695152-120696316	0.265509	0.27475	1.27711e-36	1.18686e-34	0.00924103
HNRNPA1	clu_28657_?	i001	chr12:54281502-54281795	0.548306	0.440911	1.59186e-36	1.45512e-34	-0.107395
HNRNPA1	clu_28657_?	i002	chr12:54281502-54286662	0.00677212	0.00669397	1.59186e-36	1.45512e-34	-7.81566e-05
HNRNPA1	clu_28657_?	i003	chr12:54284317-54284549	0.367202	0.473472	1.59186e-36	1.45512e-34	0.10627
HNRNPA1	clu_28657_?	i004	chr12:54284317-54286662	0.0777196	0.078923	1.59186e-36	1.45512e-34	0.00120337
C19orf53	clu_22366_?	i001	chr19:13774574-13774652	0.694888	0.519436	3.19769e-36	2.87586e-34	-0.175452
C19orf53	clu_22366_?	i002	chr19:13774574-13778052	0.00391613	0.0045785	3.19769e-36	2.87586e-34	0.000662364
C19orf53	clu_22366_?	i003	chr19:13774707-13778052	0.293194	0.468871	3.19769e-36	2.87586e-34	0.175677
C19orf53	clu_22366_?	i004	chr19:13774903-13778052	0.0080016	0.00711387	3.19769e-36	2.87586e-34	-0.000887725
IRF1	clu_19532_?	i001	chr5:132487130-132487926	0.690458	0.639324	6.02026e-36	5.32841e-34	-0.051134
IRF1	clu_19532_?	i002	chr5:132487130-132489392	0.00145768	0.00132139	6.02026e-36	5.32841e-34	-0.000136286
IRF1	clu_19532_?	i003	chr5:132487130-132490545	0.0122735	0.0109712	6.02026e-36	5.32841e-34	-0.00130236
IRF1	clu_19532_?	i004	chr5:132488025-132489392	0.251897	0.295201	6.02026e-36	5.32841e-34	0.0433041
IRF1	clu_19532_?	i005	chr5:132488025-132490545	0.00457332	0.00429335	6.02026e-36	5.32841e-34	-0.000279971
IRF1	clu_19532_?	i006	chr5:132489483-132490545	0.0393408	0.0488892	6.02026e-36	5.32841e-34	0.00954842
PRDM2	clu_37414_?	i001	chr1:13700300-13715541	0.0794501	0.0628781	6.13319e-36	5.34354e-34	-0.016572
PRDM2	clu_37414_?	i002	chr1:13700300-13731000	0.0791191	0.0536851	6.13319e-36	5.34354e-34	-0.025434
PRDM2	clu_37414_?	i003	chr1:13700300-13749361	0.00460711	0.00281744	6.13319e-36	5.34354e-34	-0.00178967
PRDM2	clu_37414_?	i004	chr1:13703889-13715541	0.00223428	0.00220367	6.13319e-36	5.34354e-34	-3.06039e-05
PRDM2	clu_37414_?	i005	chr1:13715614-13731000	0.0721576	0.0552045	6.13319e-36	5.34354e-34	-0.0169531
PRDM2	clu_37414_?	i006	chr1:13717425-13731000	0.00300289	0.0026314	6.13319e-36	5.34354e-34	-0.000371494
PRDM2	clu_37414_?	i007	chr1:13731117-13732779	0.0509244	0.050318	6.13319e-36	5.34354e-34	-0.000606346
PRDM2	clu_37414_?	i008	chr1:13731117-13742005	0.00208774	0.00186442	6.13319e-36	5.34354e-34	-0.000223317
PRDM2	clu_37414_?	i009	chr1:13731117-13749361	0.00152364	0.00205883	6.13319e-36	5.34354e-34	0.000535194
PRDM2	clu_37414_?	i010	chr1:13731196-13732779	0.00220095	0.00112837	6.13319e-36	5.34354e-34	-0.00107258
PRDM2	clu_37414_?	i011	chr1:13732882-13742005	0.131094	0.185248	6.13319e-36	5.34354e-34	0.0541536
PRDM2	clu_37414_?	i012	chr1:13732882-13749361	0.00318417	0.00323153	6.13319e-36	5.34354e-34	4.7362e-05
PRDM2	clu_37414_?	i013	chr1:13742157-13744464	0.0022411	0.0023485	6.13319e-36	5.34354e-34	0.000107406
PRDM2	clu_37414_?	i014	chr1:13742157-13749361	0.560025	0.567862	6.13319e-36	5.34354e-34	0.00783691
PRDM2	clu_37414_?	i015	chr1:13744592-13749361	0.00614761	0.0065202	6.13319e-36	5.34354e-34	0.000372592
MSANTD4	clu_54360_?	i001	chr11:106011067-106013946	0.0400905	0.0521715	7.35867e-36	6.31261e-34	0.012081
MSANTD4	clu_54360_?	i002	chr11:106011067-106020962	0.0634734	0.108984	7.35867e-36	6.31261e-34	0.0455109
MSANTD4	clu_54360_?	i003	chr11:106011067-106021358	0.00317889	0.00437006	7.35867e-36	6.31261e-34	0.00119117
MSANTD4	clu_54360_?	i004	chr11:106011067-106021836	0.139907	0.189556	7.35867e-36	6.31261e-34	0.0496488
MSANTD4	clu_54360_?	i005	chr11:106011067-106021840	0.0352125	0.046955	7.35867e-36	6.31261e-34	0.0117425
MSANTD4	clu_54360_?	i006	chr11:106011067-106022122	0.0182588	0.0160766	7.35867e-36	6.31261e-34	-0.00218219
MSANTD4	clu_54360_?	i007	chr11:106011067-106022141	0.00947654	0.00759742	7.35867e-36	6.31261e-34	-0.00187912
MSANTD4	clu_54360_?	i008	chr11:106011067-106022195	0.656852	0.53195	7.35867e-36	6.31261e-34	-0.124902
MSANTD4	clu_54360_?	i009	chr11:106011067-106022199	0.00223512	0.00173476	7.35867e-36	6.31261e-34	-0.000500353
MSANTD4	clu_54360_?	i010	chr11:106014041-106020962	0.00718747	0.0127828	7.35867e-36	6.31261e-34	0.00559535
MSANTD4	clu_54360_?	i011	chr11:106014041-106021836	0.00227371	0.00995628	7.35867e-36	6.31261e-34	0.00768257
MSANTD4	clu_54360_?	i012	chr11:106014041-106022195	0.0202605	0.0161483	7.35867e-36	6.31261e-34	-0.00411214
MSANTD4	clu_54360_?	i013	chr11:106021914-106022195	0.00159389	0.00171765	7.35867e-36	6.31261e-34	0.000123765
PTP4A2	clu_38261_?	i001	chr1:31908960-31910038	0.422097	0.475387	1.64759e-34	1.39196e-32	0.0532904
PTP4A2	clu_38261_?	i002	chr1:31908960-31911696	0.0121815	0.0142186	1.64759e-34	1.39196e-32	0.00203718
PTP4A2	clu_38261_?	i003	chr1:31908960-31915895	0.00390223	0.00387591	1.64759e-34	1.39196e-32	-2.63232e-05
PTP4A2	clu_38261_?	i004	chr1:31910112-31911696	0.219849	0.202614	1.64759e-34	1.39196e-32	-0.0172353
PTP4A2	clu_38261_?	i005	chr1:31910112-31915895	0.00129302	0.00126342	1.64759e-34	1.39196e-32	-2.96004e-05
PTP4A2	clu_38261_?	i006	chr1:31911826-31915895	0.157986	0.140115	1.64759e-34	1.39196e-32	-0.0178713
PTP4A2	clu_38261_?	i007	chr1:31911826-31918970	0.0136647	0.0124291	1.64759e-34	1.39196e-32	-0.00123559
PTP4A2	clu_38261_?	i008	chr1:31911826-31937987	0.00556677	0.00491809	1.64759e-34	1.39196e-32	-0.000648683
PTP4A2	clu_38261_?	i009	chr1:31915987-31918970	0.0996961	0.0885171	1.64759e-34	1.39196e-32	-0.0111791
PTP4A2	clu_38261_?	i010	chr1:31919658-31937987	0.0611657	0.054274	1.64759e-34	1.39196e-32	-0.00689166
PTP4A2	clu_38261_?	i011	chr1:31931142-31937987	0.00259763	0.00238753	1.64759e-34	1.39196e-32	-0.000210099
ADRM1	clu_48416_?	i001	chr20:62308178-62308368	0.189304	0.216858	3.18035e-34	2.64681e-32	0.0275541
ADRM1	clu_48416_?	i002	chr20:62308178-62308655	0.0307235	0.0407315	3.18035e-34	2.64681e-32	0.010008
ADRM1	clu_48416_?	i003	chr20:62308470-62308655	0.779972	0.74241	3.18035e-34	2.64681e-32	-0.0375621
SERF1B,SMN2	clu_18683_?	i001	chr5:70026515-70032315	0.0950583	0.190326	3.57402e-34	2.9307e-32	0.0952676
SERF1B,SMN2	clu_18683_?	i002	chr5:70026515-70063415	0.00691673	0.00883626	3.57402e-34	2.9307e-32	0.00191953
SERF1B,SMN2	clu_18683_?	i003	chr5:70041631-70063415	0.00705894	0.0103254	3.57402e-34	2.9307e-32	0.0032665
SERF1B,SMN2	clu_18683_?	i004	chr5:70049766-70063415	0.890966	0.790512	3.57402e-34	2.9307e-32	-0.100454
EMP3	clu_24400_?	i001	chr19:48325610-48326830	0.222696	0.132573	7.23275e-34	5.7614e-32	-0.0901223
EMP3	clu_24400_?	i002	chr19:48325610-48327521	0.0391428	0.0279356	7.23275e-34	5.7614e-32	-0.0112073
EMP3	clu_24400_?	i003	chr19:48325610-48329352	0.0173579	0.0171512	7.23275e-34	5.7614e-32	-0.000206622
EMP3	clu_24400_?	i004	chr19:48326922-48327521	0.11645	0.101344	7.23275e-34	5.7614e-32	-0.015106
EMP3	clu_24400_?	i005	chr19:48327623-48329352	0.590091	0.704002	7.23275e-34	5.7614e-32	0.113912
EMP3	clu_24400_?	i006	chr19:48327623-48329432	0.0142631	0.0169934	7.23275e-34	5.7614e-32	0.00273026
ATP5MF	clu_45693_?	i001	chr7:99458355-99459147	0.783643	0.747883	7.1315e-34	5.7614e-32	-0.0357602
ATP5MF	clu_45693_?	i002	chr7:99458355-99460086	0.0350567	0.0304051	7.1315e-34	5.7614e-32	-0.00465161
ATP5MF	clu_45693_?	i003	chr7:99459263-99460086	0.1813	0.221712	7.1315e-34	5.7614e-32	0.0404118
HIGD1A,AC099329.1	clu_58840_?	i001	chr3:42786162-42788622	0.0061065	0.00402283	1.05026e-33	8.2482e-32	-0.00208367
HIGD1A,AC099329.1	clu_58840_?	i002	chr3:42786162-42794157	0.401297	0.53326	1.05026e-33	8.2482e-32	0.131962
HIGD1A,AC099329.1	clu_58840_?	i003	chr3:42786162-42804436	0.0256362	0.0261634	1.05026e-33	8.2482e-32	0.000527218
HIGD1A,AC099329.1	clu_58840_?	i004	chr3:42786964-42794157	0.00643082	0.00653506	1.05026e-33	8.2482e-32	0.000104231
HIGD1A,AC099329.1	clu_58840_?	i005	chr3:42794275-42804172	0.0068128	0.00733731	1.05026e-33	8.2482e-32	0.00052451
HIGD1A,AC099329.1	clu_58840_?	i006	chr3:42794275-42804436	0.548311	0.419222	1.05026e-33	8.2482e-32	-0.129089
HIGD1A,AC099329.1	clu_58840_?	i007	chr3:42794299-42804436	0.00540542	0.00345984	1.05026e-33	8.2482e-32	-0.00194558
CHURC1	clu_26167_?	i001	chr14:64924126-64926007	0.0396688	0.0463115	1.14306e-33	8.85236e-32	0.00664278
CHURC1	clu_26167_?	i002	chr14:64924126-64926010	0.270799	0.298875	1.14306e-33	8.85236e-32	0.0280753
CHURC1	clu_26167_?	i003	chr14:64924126-64932138	0.0619115	0.048876	1.14306e-33	8.85236e-32	-0.0130355
CHURC1	clu_26167_?	i004	chr14:64926080-64932138	0.62762	0.605938	1.14306e-33	8.85236e-32	-0.0216825
UQCRH	clu_39049_?	i001	chr1:46309127-46310155	0.04749	0.0577505	1.39992e-33	1.06931e-31	0.0102605
UQCRH	clu_39049_?	i002	chr1:46309127-46316552	0.00143949	0.00102652	1.39992e-33	1.06931e-31	-0.000412973
UQCRH	clu_39049_?	i003	chr1:46310044-46310155	0.00186165	0.00206626	1.39992e-33	1.06931e-31	0.000204611
UQCRH	clu_39049_?	i004	chr1:46310316-46316552	0.949209	0.939157	1.39992e-33	1.06931e-31	-0.0100521
SNRPD3,GGT1	clu_5269_?	i001	chr22:24557800-24567984	0.236223	0.163656	9.29863e-33	7.00665e-31	-0.0725674
SNRPD3,GGT1	clu_5269_?	i002	chr22:24557800-24571916	0.021071	0.021605	9.29863e-33	7.00665e-31	0.000534048
SNRPD3,GGT1	clu_5269_?	i003	chr22:24568176-24571916	0.742706	0.814739	9.29863e-33	7.00665e-31	0.0720334
CCDC25	clu_16385_?	i001	chr8:27748279-27748495	0.487662	0.448679	1.10851e-32	8.24141e-31	-0.0389834
CCDC25	clu_16385_?	i002	chr8:27748279-27752512	0.0342504	0.0269215	1.10851e-32	8.24141e-31	-0.00732888
CCDC25	clu_16385_?	i003	chr8:27748279-27756719	0.00134525	0.00108914	1.10851e-32	8.24141e-31	-0.000256103
CCDC25	clu_16385_?	i004	chr8:27748598-27752512	0.296034	0.321295	1.10851e-32	8.24141e-31	0.0252618
CCDC25	clu_16385_?	i005	chr8:27752587-27756719	0.110582	0.123753	1.10851e-32	8.24141e-31	0.0131711
CCDC25	clu_16385_?	i006	chr8:27752587-27762419	0.0184431	0.0188154	1.10851e-32	8.24141e-31	0.000372335
CCDC25	clu_16385_?	i007	chr8:27756770-27762419	0.0516834	0.0594466	1.10851e-32	8.24141e-31	0.00776313
NASP	clu_38996_?	i001	chr1:45591270-45602255	0.24213	0.274858	2.17779e-32	1.59781e-30	0.032728
NASP	clu_38996_?	i002	chr1:45591270-45604936	0.00887595	0.008332	2.17779e-32	1.59781e-30	-0.000543951
NASP	clu_38996_?	i003	chr1:45600457-45602255	0.00582887	0.00738191	2.17779e-32	1.59781e-30	0.00155303
NASP	clu_38996_?	i004	chr1:45602365-45604936	0.743166	0.709428	2.17779e-32	1.59781e-30	-0.0337371
GMFG	clu_23660_?	i001	chr19:39328548-39329000	0.605981	0.570583	2.37568e-32	1.72036e-30	-0.0353979
GMFG	clu_23660_?	i002	chr19:39328548-39329049	0.00428065	0.00354455	2.37568e-32	1.72036e-30	-0.000736105
GMFG	clu_23660_?	i003	chr19:39328548-39333077	0.00267858	0.0031467	2.37568e-32	1.72036e-30	0.000468118
GMFG	clu_23660_?	i004	chr19:39328548-39335261	0.0043278	0.0033761	2.37568e-32	1.72036e-30	-0.000951704
GMFG	clu_23660_?	i005	chr19:39329073-39329544	0.276568	0.29445	2.37568e-32	1.72036e-30	0.0178824
GMFG	clu_23660_?	i006	chr19:39329073-39329548	0.00287873	0.00233818	2.37568e-32	1.72036e-30	-0.000540552
GMFG	clu_23660_?	i007	chr19:39329073-39333077	0.0119123	0.0133685	2.37568e-32	1.72036e-30	0.00145621
GMFG	clu_23660_?	i008	chr19:39329626-39333077	0.0543223	0.0652797	2.37568e-32	1.72036e-30	0.0109574
GMFG	clu_23660_?	i009	chr19:39333126-39335261	0.0246527	0.029468	2.37568e-32	1.72036e-30	0.00481529
GMFG	clu_23660_?	i010	chr19:39333126-39335435	0.00154694	0.00166274	2.37568e-32	1.72036e-30	0.000115805
GMFG	clu_23660_?	i011	chr19:39335310-39335435	0.0108512	0.0127823	2.37568e-32	1.72036e-30	0.00193108
NDUFB8	clu_8311_?	i001	chr10:100523929-100526399	0.915811	0.892046	4.05502e-32	2.89882e-30	-0.0237647
NDUFB8	clu_8311_?	i002	chr10:100523929-100526975	0.00298351	0.0032484	4.05502e-32	2.89882e-30	0.000264894
NDUFB8	clu_8311_?	i003	chr10:100526554-100526975	0.0812054	0.104705	4.05502e-32	2.89882e-30	0.0234998
HIKESHI	clu_54210_?	i001	chr11:86302478-86306245	0.00284246	0.00272123	9.05303e-32	6.38983e-30	-0.000121231
HIKESHI	clu_54210_?	i002	chr11:86302478-86337379	0.00135209	0.00181735	9.05303e-32	6.38983e-30	0.000465262
HIKESHI	clu_54210_?	i003	chr11:86306482-86337379	0.0460751	0.061853	9.05303e-32	6.38983e-30	0.0157779
HIKESHI	clu_54210_?	i004	chr11:86306482-86344603	0.0017773	0.00153375	9.05303e-32	6.38983e-30	-0.000243552
HIKESHI	clu_54210_?	i005	chr11:86337492-86344603	0.00118144	0.00119381	9.05303e-32	6.38983e-30	1.23679e-05
HIKESHI	clu_54210_?	i006	chr11:86337530-86344603	0.493921	0.518286	9.05303e-32	6.38983e-30	0.0243647
HIKESHI	clu_54210_?	i007	chr11:86337530-86344663	0.0144632	0.0124572	9.05303e-32	6.38983e-30	-0.00200597
HIKESHI	clu_54210_?	i008	chr11:86337530-86345584	0.00246553	0.00232294	9.05303e-32	6.38983e-30	-0.000142593
HIKESHI	clu_54210_?	i009	chr11:86344721-86345094	0.00310664	0.00318474	9.05303e-32	6.38983e-30	7.81039e-05
HIKESHI	clu_54210_?	i010	chr11:86344721-86345584	0.430035	0.392218	9.05303e-32	6.38983e-30	-0.0378178
HIKESHI	clu_54210_?	i011	chr11:86345198-86345584	0.00278003	0.0024128	9.05303e-32	6.38983e-30	-0.000367227
RPP30	clu_8013_?	i001	chr10:90894891-90895454	0.061711	0.077972	1.05847e-31	7.37756e-30	0.016261
RPP30	clu_8013_?	i002	chr10:90894891-90895880	0.0122033	0.0113454	1.05847e-31	7.37756e-30	-0.000857892
RPP30	clu_8013_?	i003	chr10:90894891-90900570	0.00196089	0.00179808	1.05847e-31	7.37756e-30	-0.00016281
RPP30	clu_8013_?	i004	chr10:90895483-90895880	0.101028	0.122052	1.05847e-31	7.37756e-30	0.0210239
RPP30	clu_8013_?	i005	chr10:90895917-90896313	0.217513	0.239794	1.05847e-31	7.37756e-30	0.0222813
RPP30	clu_8013_?	i006	chr10:90895917-90896315	0.00119373	0.00123733	1.05847e-31	7.37756e-30	4.35943e-05
RPP30	clu_8013_?	i007	chr10:90895917-90900547	0.00244984	0.00229901	1.05847e-31	7.37756e-30	-0.000150835
RPP30	clu_8013_?	i008	chr10:90896392-90900547	0.00126316	0.00116882	1.05847e-31	7.37756e-30	-9.43355e-05
RPP30	clu_8013_?	i009	chr10:90896392-90900570	0.600677	0.542333	1.05847e-31	7.37756e-30	-0.058344
NIFK	clu_13167_?	i001	chr2:121731104-121732096	0.698325	0.65559	1.30544e-31	8.98659e-30	-0.042735
NIFK	clu_13167_?	i002	chr2:121731104-121735613	0.00442946	0.00349066	1.30544e-31	8.98659e-30	-0.000938801
NIFK	clu_13167_?	i003	chr2:121732204-121735613	0.297245	0.340919	1.30544e-31	8.98659e-30	0.0436738
PCNP	clu_59771_?	i001	chr3:101574279-101579589	0.00298706	0.00128999	2.18062e-31	1.48282e-29	-0.00169707
PCNP	clu_59771_?	i002	chr3:101574279-101579790	0.185133	0.1484	2.18062e-31	1.48282e-29	-0.0367324
PCNP	clu_59771_?	i003	chr3:101574279-101579842	0.0400508	0.0252169	2.18062e-31	1.48282e-29	-0.0148339
PCNP	clu_59771_?	i004	chr3:101574279-101585437	0.0082053	0.00571073	2.18062e-31	1.48282e-29	-0.00249457
PCNP	clu_59771_?	i005	chr3:101574279-101590215	0.00621599	0.00448141	2.18062e-31	1.48282e-29	-0.00173458
PCNP	clu_59771_?	i006	chr3:101580004-101585437	0.254324	0.232979	2.18062e-31	1.48282e-29	-0.0213459
PCNP	clu_59771_?	i007	chr3:101580004-101585440	0.00963109	0.00817089	2.18062e-31	1.48282e-29	-0.0014602
PCNP	clu_59771_?	i008	chr3:101580004-101590215	0.00342678	0.00301202	2.18062e-31	1.48282e-29	-0.000414765
PCNP	clu_59771_?	i009	chr3:101585511-101590215	0.218142	0.237093	2.18062e-31	1.48282e-29	0.0189503
PCNP	clu_59771_?	i010	chr3:101585511-101592627	0.00852438	0.00752112	2.18062e-31	1.48282e-29	-0.00100327
PCNP	clu_59771_?	i011	chr3:101590270-101592627	0.263359	0.326125	2.18062e-31	1.48282e-29	0.0627664
MCUR1	clu_55195_?	i001	chr6:13790864-13791878	0.269361	0.233902	4.94265e-31	3.32051e-29	-0.0354591
MCUR1	clu_55195_?	i002	chr6:13790864-13793894	0.00260201	0.00248107	4.94265e-31	3.32051e-29	-0.000120934
MCUR1	clu_55195_?	i003	chr6:13791992-13793894	0.392835	0.390305	4.94265e-31	3.32051e-29	-0.0025294
MCUR1	clu_55195_?	i004	chr6:13791992-13798833	0.00137666	0.00131302	4.94265e-31	3.32051e-29	-6.36412e-05
MCUR1	clu_55195_?	i005	chr6:13793947-13798833	0.231292	0.257909	4.94265e-31	3.32051e-29	0.0266175
MCUR1	clu_55195_?	i006	chr6:13793947-13800341	0.00428771	0.00450916	4.94265e-31	3.32051e-29	0.000221448
MCUR1	clu_55195_?	i007	chr6:13798904-13800341	0.0982463	0.10958	4.94265e-31	3.32051e-29	0.0113341
RSRC2	clu_30460_?	i001	chr12:122521428-122522143	0.408207	0.490444	6.20254e-31	4.11731e-29	0.0822372
RSRC2	clu_30460_?	i002	chr12:122521428-122526848	0.00318068	0.00377596	6.20254e-31	4.11731e-29	0.000595279
RSRC2	clu_30460_?	i003	chr12:122522299-122522799	0.00748154	0.00896355	6.20254e-31	4.11731e-29	0.00148201
RSRC2	clu_30460_?	i004	chr12:122522299-122526848	0.570038	0.483506	6.20254e-31	4.11731e-29	-0.0865314
RSRC2	clu_30460_?	i005	chr12:122522906-122526170	0.00279016	0.00334843	6.20254e-31	4.11731e-29	0.000558267
RSRC2	clu_30460_?	i006	chr12:122522906-122526848	0.00830264	0.00996123	6.20254e-31	4.11731e-29	0.00165859
GAS5	clu_41529_?	i001	chr1:173864304-173864484	0.403592	0.379165	8.36922e-31	5.49021e-29	-0.0244268
GAS5	clu_41529_?	i002	chr1:173864304-173864675	0.0315193	0.0296765	8.36922e-31	5.49021e-29	-0.00184283
GAS5	clu_41529_?	i003	chr1:173864304-173865229	0.00285496	0.00270568	8.36922e-31	5.49021e-29	-0.000149275
GAS5	clu_41529_?	i004	chr1:173864304-173865471	0.00282166	0.00286727	8.36922e-31	5.49021e-29	4.56099e-05
GAS5	clu_41529_?	i005	chr1:173864304-173865510	0.00538751	0.00525551	8.36922e-31	5.49021e-29	-0.000131996
GAS5	clu_41529_?	i006	chr1:173864502-173864675	0.00272532	0.00293773	8.36922e-31	5.49021e-29	0.000212404
GAS5	clu_41529_?	i007	chr1:173864506-173864675	0.290444	0.292578	8.36922e-31	5.49021e-29	0.00213439
GAS5	clu_41529_?	i008	chr1:173864704-173865229	0.196704	0.209209	8.36922e-31	5.49021e-29	0.0125049
GAS5	clu_41529_?	i009	chr1:173864704-173865510	0.00210445	0.00231312	8.36922e-31	5.49021e-29	0.000208673
GAS5	clu_41529_?	i010	chr1:173865282-173865471	0.0250583	0.0304967	8.36922e-31	5.49021e-29	0.00543836
GAS5	clu_41529_?	i011	chr1:173865282-173865510	0.0367889	0.0427955	8.36922e-31	5.49021e-29	0.00600655
SPATS2L	clu_14140_?	i001	chr2:200306601-200329431	0.097592	0.0841671	1.32635e-30	8.59967e-29	-0.0134249
SPATS2L	clu_14140_?	i002	chr2:200306601-200389223	0.00147813	0.000869964	1.32635e-30	8.59967e-29	-0.000608165
SPATS2L	clu_14140_?	i003	chr2:200306922-200329431	0.259613	0.273018	1.32635e-30	8.59967e-29	0.0134048
SPATS2L	clu_14140_?	i004	chr2:200306922-200389223	0.00199955	0.00243335	1.32635e-30	8.59967e-29	0.000433798
SPATS2L	clu_14140_?	i005	chr2:200309090-200329431	0.00618623	0.00910789	1.32635e-30	8.59967e-29	0.00292166
SPATS2L	clu_14140_?	i006	chr2:200329480-200372109	0.00216078	0.00411873	1.32635e-30	8.59967e-29	0.00195796
SPATS2L	clu_14140_?	i007	chr2:200329480-200383867	0.00219978	0.00296354	1.32635e-30	8.59967e-29	0.00076376
SPATS2L	clu_14140_?	i008	chr2:200329480-200389223	0.586262	0.552286	1.32635e-30	8.59967e-29	-0.0339762
SPATS2L	clu_14140_?	i009	chr2:200372251-200389223	0.0225376	0.0282949	1.32635e-30	8.59967e-29	0.00575727
SPATS2L	clu_14140_?	i010	chr2:200378371-200389223	0.0029844	0.00640872	1.32635e-30	8.59967e-29	0.00342432
SPATS2L	clu_14140_?	i011	chr2:200384017-200389223	0.0169865	0.0363321	1.32635e-30	8.59967e-29	0.0193456
TRAPPC10	clu_691_?	i001	chr21:44032172-44037792	0.354129	0.422505	2.0144e-30	1.29107e-28	0.0683765
TRAPPC10	clu_691_?	i002	chr21:44032172-44052280	0.00102041	0.000939045	2.0144e-30	1.29107e-28	-8.13631e-05
TRAPPC10	clu_691_?	i003	chr21:44032935-44037792	0.0051241	0.00677509	2.0144e-30	1.29107e-28	0.001651
TRAPPC10	clu_691_?	i004	chr21:44033083-44037792	0.00145057	0.00230854	2.0144e-30	1.29107e-28	0.000857969
TRAPPC10	clu_691_?	i005	chr21:44033319-44037792	0.00224034	0.00335009	2.0144e-30	1.29107e-28	0.00110975
TRAPPC10	clu_691_?	i006	chr21:44037927-44052262	0.00133577	0.0013549	2.0144e-30	1.29107e-28	1.91261e-05
TRAPPC10	clu_691_?	i007	chr21:44037927-44052280	0.6347	0.562767	2.0144e-30	1.29107e-28	-0.0719329
RAC1	clu_43923_?	i001	chr7:6400188-6401868	0.0804298	0.102701	5.85036e-30	3.707e-28	0.0222714
RAC1	clu_43923_?	i002	chr7:6400188-6402316	0.00318286	0.0040641	5.85036e-30	3.707e-28	0.000881236
RAC1	clu_43923_?	i003	chr7:6402027-6402316	0.916387	0.893235	5.85036e-30	3.707e-28	-0.0231527
PARK7	clu_37157_?	i001	chr1:7970963-7977652	0.408372	0.314059	1.31327e-29	8.22787e-28	-0.0943124
PARK7	clu_37157_?	i002	chr1:7970963-7984894	0.00407853	0.00318909	1.31327e-29	8.22787e-28	-0.00088944
PARK7	clu_37157_?	i003	chr1:7977738-7984894	0.58755	0.682752	1.31327e-29	8.22787e-28	0.0952018
PHACTR4	clu_38113_?	i001	chr1:28369825-28392588	0.00158973	0.00172679	1.47037e-29	9.10973e-28	0.000137062
PHACTR4	clu_38113_?	i002	chr1:28369825-28392842	0.0198921	0.0203228	1.47037e-29	9.10973e-28	0.000430721
PHACTR4	clu_38113_?	i003	chr1:28369825-28406903	0.00125736	0.00129566	1.47037e-29	9.10973e-28	3.83044e-05
PHACTR4	clu_38113_?	i004	chr1:28369825-28407410	0.442097	0.403523	1.47037e-29	9.10973e-28	-0.0385743
PHACTR4	clu_38113_?	i005	chr1:28369825-28459085	0.00501518	0.00462924	1.47037e-29	9.10973e-28	-0.000385942
PHACTR4	clu_38113_?	i006	chr1:28392941-28407410	0.0420011	0.0426512	1.47037e-29	9.10973e-28	0.000650056
PHACTR4	clu_38113_?	i007	chr1:28406950-28407410	0.00180507	0.00208852	1.47037e-29	9.10973e-28	0.00028345
PHACTR4	clu_38113_?	i008	chr1:28407463-28420401	0.00271886	0.00194306	1.47037e-29	9.10973e-28	-0.0007758
PHACTR4	clu_38113_?	i009	chr1:28407463-28432931	0.0103954	0.014192	1.47037e-29	9.10973e-28	0.00379656
PHACTR4	clu_38113_?	i010	chr1:28407463-28438273	0.00811602	0.00719475	1.47037e-29	9.10973e-28	-0.000921262
PHACTR4	clu_38113_?	i011	chr1:28407463-28439310	0.0026666	0.00254544	1.47037e-29	9.10973e-28	-0.000121156
PHACTR4	clu_38113_?	i012	chr1:28407463-28447417	0.0010788	0.000690291	1.47037e-29	9.10973e-28	-0.000388513
PHACTR4	clu_38113_?	i013	chr1:28407463-28457832	0.060221	0.055695	1.47037e-29	9.10973e-28	-0.00452606
PHACTR4	clu_38113_?	i014	chr1:28407463-28459085	0.222187	0.205585	1.47037e-29	9.10973e-28	-0.0166017
PHACTR4	clu_38113_?	i015	chr1:28420465-28457832	0.0020897	0.00101432	1.47037e-29	9.10973e-28	-0.00107538
PHACTR4	clu_38113_?	i016	chr1:28420465-28459085	0.0015906	0.000671537	1.47037e-29	9.10973e-28	-0.000919068
PHACTR4	clu_38113_?	i017	chr1:28433046-28457832	0.00295094	0.00238811	1.47037e-29	9.10973e-28	-0.000562829
PHACTR4	clu_38113_?	i018	chr1:28433046-28459085	0.0217089	0.020021	1.47037e-29	9.10973e-28	-0.00168795
PHACTR4	clu_38113_?	i019	chr1:28438430-28439310	0.00351365	0.00528437	1.47037e-29	9.10973e-28	0.00177072
PHACTR4	clu_38113_?	i020	chr1:28438430-28457832	0.00798711	0.0113427	1.47037e-29	9.10973e-28	0.00335556
PHACTR4	clu_38113_?	i021	chr1:28438430-28459085	0.0512439	0.0995338	1.47037e-29	9.10973e-28	0.0482899
PHACTR4	clu_38113_?	i022	chr1:28438488-28459085	0.00735926	0.0142846	1.47037e-29	9.10973e-28	0.00692529
PHACTR4	clu_38113_?	i023	chr1:28439361-28457832	0.00701607	0.00881259	1.47037e-29	9.10973e-28	0.00179652
PHACTR4	clu_38113_?	i024	chr1:28439361-28459085	0.00165255	0.00199024	1.47037e-29	9.10973e-28	0.000337691
PHACTR4	clu_38113_?	i025	chr1:28457855-28459085	0.0511006	0.0490647	1.47037e-29	9.10973e-28	-0.00203592
PHACTR4	clu_38113_?	i026	chr1:28457859-28459085	0.0207449	0.0215089	1.47037e-29	9.10973e-28	0.000764025
CTNNAL1	clu_1992_?	i001	chr9:108990845-108992632	0.672502	0.663323	1.09813e-28	6.72877e-27	-0.00917903
CTNNAL1	clu_1992_?	i002	chr9:108990845-109013302	0.00235806	0.002078	1.09813e-28	6.72877e-27	-0.000280058
CTNNAL1	clu_1992_?	i003	chr9:108992819-108999067	0.145086	0.202955	1.09813e-28	6.72877e-27	0.0578688
CTNNAL1	clu_1992_?	i004	chr9:108992819-109013302	0.00710888	0.00908934	1.09813e-28	6.72877e-27	0.00198045
CTNNAL1	clu_1992_?	i005	chr9:108999256-109013302	0.172946	0.122555	1.09813e-28	6.72877e-27	-0.0503902
MRPL52	clu_25332_?	i001	chr14:22830254-22830964	0.00199371	0.00257488	1.7209e-28	1.04302e-26	0.000581169
MRPL52	clu_25332_?	i002	chr14:22830254-22833418	0.329894	0.354421	1.7209e-28	1.04302e-26	0.024527
MRPL52	clu_25332_?	i003	chr14:22830254-22834172	0.0311808	0.0303649	1.7209e-28	1.04302e-26	-0.000815879
MRPL52	clu_25332_?	i004	chr14:22831037-22833418	0.00467136	0.00605425	1.7209e-28	1.04302e-26	0.00138289
MRPL52	clu_25332_?	i005	chr14:22831037-22834172	0.00192229	0.00187309	1.7209e-28	1.04302e-26	-4.91984e-05
MRPL52	clu_25332_?	i006	chr14:22833482-22834172	0.61561	0.589928	1.7209e-28	1.04302e-26	-0.0256821
MRPL52	clu_25332_?	i007	chr14:22833489-22834172	0.0147276	0.0147838	1.7209e-28	1.04302e-26	5.61144e-05
RPL6	clu_30085_?	i001	chr12:112408656-112409411	0.0102541	0.0208851	2.14143e-28	1.28394e-26	0.010631
RPL6	clu_30085_?	i002	chr12:112408656-112409587	0.989746	0.979115	2.14143e-28	1.28394e-26	-0.010631
MRPS5	clu_12630_?	i001	chr2:95110041-95115066	0.419643	0.366368	3.3991e-28	2.01632e-26	-0.0532742
MRPS5	clu_12630_?	i002	chr2:95110041-95117865	0.00169522	0.00127842	3.3991e-28	2.01632e-26	-0.000416801
MRPS5	clu_12630_?	i003	chr2:95110103-95115066	0.00663946	0.0049305	3.3991e-28	2.01632e-26	-0.00170896
MRPS5	clu_12630_?	i004	chr2:95115203-95117865	0.572023	0.627423	3.3991e-28	2.01632e-26	0.0554
MEF2C	clu_19044_?	i001	chr5:88823927-88824310	0.0109794	0.00691177	4.6233e-28	2.71363e-26	-0.00406766
MEF2C	clu_19044_?	i002	chr5:88823927-88827036	0.00271036	0.00173416	4.6233e-28	2.71363e-26	-0.000976198
MEF2C	clu_19044_?	i003	chr5:88823927-88839379	0.00255211	0.00411865	4.6233e-28	2.71363e-26	0.00156655
MEF2C	clu_19044_?	i004	chr5:88823927-88880924	0.0122856	0.0163452	4.6233e-28	2.71363e-26	0.00405961
MEF2C	clu_19044_?	i005	chr5:88823927-88882955	0.404269	0.395629	4.6233e-28	2.71363e-26	-0.00864043
MEF2C	clu_19044_?	i006	chr5:88823927-88883049	0.0045004	0.00374649	4.6233e-28	2.71363e-26	-0.000753914
MEF2C	clu_19044_?	i007	chr5:88823927-88883652	0.00398073	0.00372501	4.6233e-28	2.71363e-26	-0.000255727
MEF2C	clu_19044_?	i008	chr5:88823927-88887502	0.00874647	0.00630434	4.6233e-28	2.71363e-26	-0.00244213
MEF2C	clu_19044_?	i009	chr5:88823930-88824310	0.0114879	0.0072103	4.6233e-28	2.71363e-26	-0.00427764
MEF2C	clu_19044_?	i010	chr5:88823930-88827036	0.00210786	0.00140432	4.6233e-28	2.71363e-26	-0.000703544
MEF2C	clu_19044_?	i011	chr5:88823930-88839379	0.00342083	0.00381552	4.6233e-28	2.71363e-26	0.000394689
MEF2C	clu_19044_?	i012	chr5:88823930-88862807	0.0020777	0.00232426	4.6233e-28	2.71363e-26	0.000246557
MEF2C	clu_19044_?	i013	chr5:88823930-88880924	0.0135613	0.0164224	4.6233e-28	2.71363e-26	0.00286104
MEF2C	clu_19044_?	i014	chr5:88823930-88882955	0.419886	0.425868	4.6233e-28	2.71363e-26	0.00598207
MEF2C	clu_19044_?	i015	chr5:88823930-88883049	0.0029289	0.00283146	4.6233e-28	2.71363e-26	-9.74415e-05
MEF2C	clu_19044_?	i016	chr5:88823930-88884489	0.00195524	0.00213567	4.6233e-28	2.71363e-26	0.000180428
MEF2C	clu_19044_?	i017	chr5:88823930-88887502	0.0120928	0.00863788	4.6233e-28	2.71363e-26	-0.00345489
MEF2C	clu_19044_?	i018	chr5:88862962-88882955	0.00323973	0.00489684	4.6233e-28	2.71363e-26	0.00165711
MEF2C	clu_19044_?	i019	chr5:88878020-88880924	0.00137736	0.00208411	4.6233e-28	2.71363e-26	0.000706748
MEF2C	clu_19044_?	i020	chr5:88878020-88882955	0.00219437	0.00238279	4.6233e-28	2.71363e-26	0.000188417
MEF2C	clu_19044_?	i021	chr5:88881022-88882955	0.035653	0.0484902	4.6233e-28	2.71363e-26	0.0128372
MEF2C	clu_19044_?	i022	chr5:88882999-88883652	0.0379928	0.0329819	4.6233e-28	2.71363e-26	-0.00501089
TMEM219	clu_50300_?	i001	chr16:29968254-29971408	0.288824	0.349632	5.10683e-28	2.93564e-26	0.0608084
TMEM219	clu_50300_?	i002	chr16:29968254-29972950	0.00310852	0.00236194	5.10683e-28	2.93564e-26	-0.000746578
TMEM219	clu_50300_?	i003	chr16:29971578-29972042	0.0319606	0.0371817	5.10683e-28	2.93564e-26	0.00522116
TMEM219	clu_50300_?	i004	chr16:29971578-29972950	0.646302	0.579041	5.10683e-28	2.93564e-26	-0.0672615
TMEM219	clu_50300_?	i005	chr16:29972140-29972950	0.0298049	0.0317835	5.10683e-28	2.93564e-26	0.00197858
ADSL	clu_5993_?	i001	chr22:40364365-40364880	0.163395	0.211453	5.06162e-28	2.93564e-26	0.048058
ADSL	clu_5993_?	i002	chr22:40364365-40366436	0.0560674	0.0610338	5.06162e-28	2.93564e-26	0.00496636
ADSL	clu_5993_?	i003	chr22:40365056-40366436	0.780538	0.727513	5.06162e-28	2.93564e-26	-0.0530244
SNRPB	clu_47074_?	i001	chr20:2461793-2462636	0.765989	0.69697	7.73933e-28	4.40352e-26	-0.069019
SNRPB	clu_47074_?	i002	chr20:2461939-2462636	0.234011	0.30303	7.73933e-28	4.40352e-26	0.069019
EIF3K	clu_23564_?	i001	chr19:38632496-38632601	0.269205	0.306288	1.17792e-27	6.6344e-26	0.0370832
EIF3K	clu_23564_?	i002	chr19:38632496-38634993	0.034949	0.0334608	1.17792e-27	6.6344e-26	-0.00148816
EIF3K	clu_23564_?	i003	chr19:38632678-38634993	0.695846	0.660251	1.17792e-27	6.6344e-26	-0.0355951
PSMA4	clu_10543_?	i001	chr15:78545764-78546575	0.465738	0.525093	1.24213e-27	6.9261e-26	0.0593549
PSMA4	clu_10543_?	i002	chr15:78545764-78548790	0.017007	0.0148656	1.24213e-27	6.9261e-26	-0.00214147
PSMA4	clu_10543_?	i003	chr15:78546698-78548790	0.517255	0.460041	1.24213e-27	6.9261e-26	-0.0572134
MYL6B,MYL6	clu_28755_?	i001	chr12:56158711-56159587	0.42944	0.352827	1.44455e-27	7.97508e-26	-0.0766131
MYL6B,MYL6	clu_28755_?	i002	chr12:56158711-56159975	0.0318573	0.0290917	1.44455e-27	7.97508e-26	-0.00276563
MYL6B,MYL6	clu_28755_?	i003	chr12:56159730-56159975	0.538702	0.618081	1.44455e-27	7.97508e-26	0.0793788
RNF181	clu_12517_?	i001	chr2:85596649-85596822	0.06339	0.0773788	1.80527e-27	9.86881e-26	0.0139887
RNF181	clu_12517_?	i002	chr2:85596649-85596857	0.00512017	0.00605889	1.80527e-27	9.86881e-26	0.000938717
RNF181	clu_12517_?	i003	chr2:85596649-85597104	0.0335516	0.0332563	1.80527e-27	9.86881e-26	-0.000295246
RNF181	clu_12517_?	i004	chr2:85596649-85597445	0.0027478	0.00277616	1.80527e-27	9.86881e-26	2.83596e-05
RNF181	clu_12517_?	i005	chr2:85596931-85597104	0.37052	0.390162	1.80527e-27	9.86881e-26	0.0196421
RNF181	clu_12517_?	i006	chr2:85596931-85597445	0.00165384	0.00187344	1.80527e-27	9.86881e-26	0.000219603
RNF181	clu_12517_?	i007	chr2:85597178-85597445	0.523017	0.488494	1.80527e-27	9.86881e-26	-0.0345222
RFTN1	clu_58514_?	i001	chr3:16323457-16326773	0.660531	0.616495	2.14902e-27	1.16339e-25	-0.0440368
RFTN1	clu_58514_?	i002	chr3:16323457-16357932	0.00311638	0.00316791	2.14902e-27	1.16339e-25	5.15295e-05
RFTN1	clu_58514_?	i003	chr3:16323472-16326773	0.00205058	0.00198756	2.14902e-27	1.16339e-25	-6.30194e-05
RFTN1	clu_58514_?	i004	chr3:16326876-16357932	0.280545	0.314299	2.14902e-27	1.16339e-25	0.033754
RFTN1	clu_58514_?	i005	chr3:16326876-16370076	0.0104408	0.0122004	2.14902e-27	1.16339e-25	0.00175958
RFTN1	clu_58514_?	i006	chr3:16358047-16370076	0.0433161	0.0518509	2.14902e-27	1.16339e-25	0.00853475
CD48	clu_41227_?	i001	chr1:160679131-160681202	0.778059	0.8591	2.46914e-27	1.32384e-25	0.0810415
CD48	clu_41227_?	i002	chr1:160679131-160684887	0.00791915	0.00853128	2.46914e-27	1.32384e-25	0.000612127
CD48	clu_41227_?	i003	chr1:160681468-160684887	0.214022	0.132369	2.46914e-27	1.32384e-25	-0.0816536
RPP38	clu_6862_?	i001	chr10:15097398-15102218	0.006452	0.00743184	3.80918e-27	2.02286e-25	0.000979839
RPP38	clu_6862_?	i002	chr10:15097398-15103305	0.0314462	0.0267182	3.80918e-27	2.02286e-25	-0.00472796
RPP38	clu_6862_?	i003	chr10:15097409-15102218	0.0405616	0.0451857	3.80918e-27	2.02286e-25	0.00462417
RPP38	clu_6862_?	i004	chr10:15097409-15103305	0.262652	0.199818	3.80918e-27	2.02286e-25	-0.0628335
RPP38	clu_6862_?	i005	chr10:15097766-15102218	0.0324998	0.0474595	3.80918e-27	2.02286e-25	0.0149597
RPP38	clu_6862_?	i006	chr10:15097766-15103305	0.288857	0.305246	3.80918e-27	2.02286e-25	0.0163889
RPP38	clu_6862_?	i007	chr10:15097799-15102218	0.000644772	0.00273182	3.80918e-27	2.02286e-25	0.00208705
RPP38	clu_6862_?	i008	chr10:15097799-15103305	0.0218343	0.0247236	3.80918e-27	2.02286e-25	0.00288931
RPP38	clu_6862_?	i009	chr10:15102336-15103305	0.315053	0.340686	3.80918e-27	2.02286e-25	0.0256325
MGLL	clu_60217_?	i001	chr3:127692323-127692966	0.032845	0.0112341	7.49672e-27	3.94356e-25	-0.0216109
MGLL	clu_60217_?	i002	chr3:127692323-127693310	0.00208469	0.00270538	7.49672e-27	3.94356e-25	0.000620686
MGLL	clu_60217_?	i003	chr3:127692323-127694193	0.00156131	0.00110867	7.49672e-27	3.94356e-25	-0.000452643
MGLL	clu_60217_?	i004	chr3:127692323-127694975	0.924209	0.933125	7.49672e-27	3.94356e-25	0.00891545
MGLL	clu_60217_?	i005	chr3:127692323-127710576	0.00614574	0.00669564	7.49672e-27	3.94356e-25	0.000549895
MGLL	clu_60217_?	i006	chr3:127695190-127710576	0.017403	0.0277409	7.49672e-27	3.94356e-25	0.0103379
MGLL	clu_60217_?	i007	chr3:127695190-127721053	0.00329942	0.00431362	7.49672e-27	3.94356e-25	0.0010142
MGLL	clu_60217_?	i008	chr3:127705121-127710576	0.00222417	0.00218409	7.49672e-27	3.94356e-25	-4.00766e-05
MGLL	clu_60217_?	i009	chr3:127710665-127721053	0.0102274	0.010893	7.49672e-27	3.94356e-25	0.000665516
KRTCAP2	clu_40857_?	i001	chr1:155169857-155172351	0.00175074	0.00205697	7.87509e-27	4.10388e-25	0.000306228
KRTCAP2	clu_40857_?	i002	chr1:155169857-155172565	0.72416	0.706825	7.87509e-27	4.10388e-25	-0.0173351
KRTCAP2	clu_40857_?	i003	chr1:155169857-155173221	0.00452923	0.00407594	7.87509e-27	4.10388e-25	-0.000453289
KRTCAP2	clu_40857_?	i004	chr1:155172628-155172738	0.236048	0.260893	7.87509e-27	4.10388e-25	0.0248457
KRTCAP2	clu_40857_?	i005	chr1:155172628-155173221	0.00192116	0.00224458	7.87509e-27	4.10388e-25	0.000323418
KRTCAP2	clu_40857_?	i006	chr1:155172892-155173221	0.0315916	0.0239047	7.87509e-27	4.10388e-25	-0.00768692
USP1	clu_39347_?	i001	chr1:62442299-62443159	0.334088	0.404347	1.66407e-26	8.59155e-25	0.0702589
USP1	clu_39347_?	i002	chr1:62442299-62444738	0.00439276	0.00519843	1.66407e-26	8.59155e-25	0.000805673
USP1	clu_39347_?	i003	chr1:62443319-62444680	0.00422609	0.00489241	1.66407e-26	8.59155e-25	0.000666316
USP1	clu_39347_?	i004	chr1:62443319-62444738	0.657294	0.585563	1.66407e-26	8.59155e-25	-0.0717309
MX1	clu_553_?	i001	chr21:41426263-41427206	0.517439	0.546558	2.44823e-26	1.25242e-24	0.0291191
MX1	clu_553_?	i002	chr21:41426263-41427755	0.191502	0.116781	2.44823e-26	1.25242e-24	-0.0747216
MX1	clu_553_?	i003	chr21:41426397-41427206	0.00287756	0.00245216	2.44823e-26	1.25242e-24	-0.000425398
MX1	clu_553_?	i004	chr21:41427304-41427755	0.288182	0.334209	2.44823e-26	1.25242e-24	0.0460278
PWP1	clu_29804_?	i001	chr12:107693096-107696474	0.507967	0.561804	3.98531e-26	2.02019e-24	0.053837
PWP1	clu_29804_?	i002	chr12:107693096-107697467	0.00271571	0.00254003	3.98531e-26	2.02019e-24	-0.000175675
PWP1	clu_29804_?	i003	chr12:107696584-107697467	0.48383	0.430477	3.98531e-26	2.02019e-24	-0.053353
PWP1	clu_29804_?	i004	chr12:107696602-107697467	0.00548794	0.00517958	3.98531e-26	2.02019e-24	-0.000308356
CANX	clu_20644_?	i001	chr5:179723019-179723660	0.542192	0.5921	4.3909e-26	2.20574e-24	0.0499074
CANX	clu_20644_?	i002	chr5:179723019-179724657	0.00349565	0.00374617	4.3909e-26	2.20574e-24	0.00025052
CANX	clu_20644_?	i003	chr5:179723779-179724657	0.454312	0.404154	4.3909e-26	2.20574e-24	-0.0501579
NSMCE4A	clu_8748_?	i001	chr10:121957259-121959324	0.605416	0.559032	4.65476e-26	2.31741e-24	-0.0463842
NSMCE4A	clu_8748_?	i002	chr10:121957259-121960358	0.00238404	0.00298387	4.65476e-26	2.31741e-24	0.000599833
NSMCE4A	clu_8748_?	i003	chr10:121959407-121959501	0.0015153	0.00184569	4.65476e-26	2.31741e-24	0.000330393
NSMCE4A	clu_8748_?	i004	chr10:121959410-121959501	0.323173	0.353336	4.65476e-26	2.31741e-24	0.0301635
NSMCE4A	clu_8748_?	i005	chr10:121959410-121960358	0.00829515	0.0102818	4.65476e-26	2.31741e-24	0.00198665
NSMCE4A	clu_8748_?	i006	chr10:121959595-121960358	0.0592172	0.072521	4.65476e-26	2.31741e-24	0.0133038
TEX9	clu_9763_?	i001	chr15:56244278-56373441	0.00127959	0.001887	8.41959e-26	4.15466e-24	0.000607403
TEX9	clu_9763_?	i002	chr15:56365670-56373441	0.116137	0.112667	8.41959e-26	4.15466e-24	-0.00347025
TEX9	clu_9763_?	i003	chr15:56365670-56412302	0.00407257	0.00250934	8.41959e-26	4.15466e-24	-0.00156323
TEX9	clu_9763_?	i004	chr15:56365893-56373441	0.023499	0.0281033	8.41959e-26	4.15466e-24	0.0046043
TEX9	clu_9763_?	i005	chr15:56368052-56373441	0.00370447	0.00269946	8.41959e-26	4.15466e-24	-0.00100502
TEX9	clu_9763_?	i006	chr15:56369603-56373441	0.00343121	0.00281891	8.41959e-26	4.15466e-24	-0.000612297
TEX9	clu_9763_?	i007	chr15:56373504-56379177	0.0018857	0.00219974	8.41959e-26	4.15466e-24	0.000314035
TEX9	clu_9763_?	i008	chr15:56373504-56383952	0.188399	0.18164	8.41959e-26	4.15466e-24	-0.00675969
TEX9	clu_9763_?	i009	chr15:56373504-56383954	0.00269367	0.00275951	8.41959e-26	4.15466e-24	6.58448e-05
TEX9	clu_9763_?	i010	chr15:56373504-56391243	0.00219072	0.00591387	8.41959e-26	4.15466e-24	0.00372316
TEX9	clu_9763_?	i011	chr15:56373504-56412302	0.0251916	0.0221362	8.41959e-26	4.15466e-24	-0.00305538
TEX9	clu_9763_?	i012	chr15:56379237-56383952	0.00306934	0.00248281	8.41959e-26	4.15466e-24	-0.000586525
TEX9	clu_9763_?	i013	chr15:56384031-56385232	0.0142672	0.0131033	8.41959e-26	4.15466e-24	-0.00116392
TEX9	clu_9763_?	i014	chr15:56384031-56388472	0.151099	0.134327	8.41959e-26	4.15466e-24	-0.0167721
TEX9	clu_9763_?	i015	chr15:56384031-56389318	0.00169123	0.00144638	8.41959e-26	4.15466e-24	-0.000244849
TEX9	clu_9763_?	i016	chr15:56384031-56394165	0.00158335	0.00168457	8.41959e-26	4.15466e-24	0.000101222
TEX9	clu_9763_?	i017	chr15:56384031-56412302	0.0106717	0.0107792	8.41959e-26	4.15466e-24	0.000107499
TEX9	clu_9763_?	i018	chr15:56385304-56388472	0.00974964	0.00925313	8.41959e-26	4.15466e-24	-0.000496519
TEX9	clu_9763_?	i019	chr15:56388520-56389318	0.0849415	0.0765519	8.41959e-26	4.15466e-24	-0.00838964
TEX9	clu_9763_?	i020	chr15:56389400-56391243	0.0333653	0.0415563	8.41959e-26	4.15466e-24	0.00819095
TEX9	clu_9763_?	i021	chr15:56389400-56412302	0.00213806	0.00331843	8.41959e-26	4.15466e-24	0.00118037
TEX9	clu_9763_?	i022	chr15:56391418-56394165	0.105	0.112165	8.41959e-26	4.15466e-24	0.00716563
TEX9	clu_9763_?	i023	chr15:56391418-56412302	0.00422495	0.00534617	8.41959e-26	4.15466e-24	0.00112122
TEX9	clu_9763_?	i024	chr15:56394834-56412302	0.205714	0.222652	8.41959e-26	4.15466e-24	0.0169378
NCAPD3	clu_54894_?	i001	chr11:134210454-134216936	0.612599	0.531591	1.42428e-25	6.96647e-24	-0.0810081
NCAPD3	clu_54894_?	i002	chr11:134210454-134220572	0.0066643	0.00487849	1.42428e-25	6.96647e-24	-0.00178581
NCAPD3	clu_54894_?	i003	chr11:134217098-134220572	0.380736	0.46353	1.42428e-25	6.96647e-24	0.0827939
RNPS1	clu_48895_?	i001	chr16:2264331-2264573	0.0655207	0.107112	1.61337e-25	7.82276e-24	0.0415916
RNPS1	clu_48895_?	i002	chr16:2264331-2268055	0.0725824	0.0994899	1.61337e-25	7.82276e-24	0.0269075
RNPS1	clu_48895_?	i003	chr16:2264760-2266110	0.00136895	0.005983	1.61337e-25	7.82276e-24	0.00461404
RNPS1	clu_48895_?	i004	chr16:2264760-2267175	0.00915072	0.0102695	1.61337e-25	7.82276e-24	0.0011188
RNPS1	clu_48895_?	i005	chr16:2264760-2267575	0.024965	0.0466925	1.61337e-25	7.82276e-24	0.0217275
RNPS1	clu_48895_?	i006	chr16:2264760-2267663	0.0777488	0.0837847	1.61337e-25	7.82276e-24	0.00603592
RNPS1	clu_48895_?	i007	chr16:2264760-2268055	0.748663	0.646668	1.61337e-25	7.82276e-24	-0.101995
POLR2J,RASA4B	clu_45935_?	i001	chr7:102474535-102476181	0.436737	0.587145	2.27673e-25	1.0944e-23	0.150408
POLR2J,RASA4B	clu_45935_?	i002	chr7:102474535-102478808	0.00951448	0.00839068	2.27673e-25	1.0944e-23	-0.0011238
POLR2J,RASA4B	clu_45935_?	i003	chr7:102476270-102477974	0.00339527	0.000650806	2.27673e-25	1.0944e-23	-0.00274447
POLR2J,RASA4B	clu_45935_?	i004	chr7:102476270-102478779	0.00109924	0.00146199	2.27673e-25	1.0944e-23	0.000362748
POLR2J,RASA4B	clu_45935_?	i005	chr7:102476270-102478808	0.482521	0.352588	2.27673e-25	1.0944e-23	-0.129933
POLR2J,RASA4B	clu_45935_?	i006	chr7:102476270-102478811	0.0557985	0.0409647	2.27673e-25	1.0944e-23	-0.0148338
POLR2J,RASA4B	clu_45935_?	i007	chr7:102476270-102485039	0.00316364	0.00252535	2.27673e-25	1.0944e-23	-0.000638297
POLR2J,RASA4B	clu_45935_?	i008	chr7:102483889-102485039	0.00777118	0.00627414	2.27673e-25	1.0944e-23	-0.00149703
GSTO1	clu_8519_?	i001	chr10:104259798-104262979	0.29501	0.221992	4.39167e-25	2.09299e-23	-0.0730176
GSTO1	clu_8519_?	i002	chr10:104259798-104266084	0.0144728	0.0166428	4.39167e-25	2.09299e-23	0.00216999
GSTO1	clu_8519_?	i003	chr10:104263077-104266084	0.690517	0.761365	4.39167e-25	2.09299e-23	0.0708477
PRR13,PCBP2	clu_28608_?	i001	chr12:53443773-53446015	0.106246	0.173824	7.8257e-25	3.69797e-23	0.0675778
PRR13,PCBP2	clu_28608_?	i002	chr12:53443773-53454726	0.00355098	0.0049132	7.8257e-25	3.69797e-23	0.00136222
PRR13,PCBP2	clu_28608_?	i003	chr12:53452376-53454726	0.869415	0.802477	7.8257e-25	3.69797e-23	-0.0669374
PRR13,PCBP2	clu_28608_?	i004	chr12:53452376-53454727	0.00388265	0.00408115	7.8257e-25	3.69797e-23	0.000198505
PRR13,PCBP2	clu_28608_?	i005	chr12:53452376-53454750	0.0169058	0.0147047	7.8257e-25	3.69797e-23	-0.0022011
NDUFS8	clu_53784_?	i001	chr11:68030733-68032152	0.0369922	0.0142129	8.60703e-25	4.03301e-23	-0.0227793
NDUFS8	clu_53784_?	i002	chr11:68030733-68036253	0.0162748	0.0115671	8.60703e-25	4.03301e-23	-0.00470772
NDUFS8	clu_53784_?	i003	chr11:68033283-68036253	0.941019	0.966773	8.60703e-25	4.03301e-23	0.0257545
NDUFS8	clu_53784_?	i004	chr11:68035788-68036253	0.00571393	0.0074465	8.60703e-25	4.03301e-23	0.00173256
UQCC2	clu_56194_?	i001	chr6:33697750-33700444	0.681285	0.650943	8.85102e-25	4.11277e-23	-0.0303421
UQCC2	clu_56194_?	i002	chr6:33697750-33701346	0.00143654	0.00171098	8.85102e-25	4.11277e-23	0.000274449
UQCC2	clu_56194_?	i003	chr6:33700513-33701346	0.317278	0.347346	8.85102e-25	4.11277e-23	0.0300676
UPF3B	clu_4532_?	i001	chrX:119841778-119843191	0.34381	0.299613	1.8143e-24	8.36077e-23	-0.0441971
UPF3B	clu_4532_?	i002	chrX:119841778-119845198	0.00669164	0.00569326	1.8143e-24	8.36077e-23	-0.000998375
UPF3B	clu_4532_?	i003	chrX:119843301-119845198	0.396505	0.40495	1.8143e-24	8.36077e-23	0.00844482
UPF3B	clu_4532_?	i004	chrX:119843301-119851495	0.00741538	0.00803103	1.8143e-24	8.36077e-23	0.000615645
UPF3B	clu_4532_?	i005	chrX:119845296-119851495	0.245578	0.281713	1.8143e-24	8.36077e-23	0.036135
CENPN	clu_51370_?	i001	chr16:81017385-81017758	0.0557658	0.0738246	2.97012e-24	1.35749e-22	0.0180588
CENPN	clu_51370_?	i002	chr16:81017385-81020100	0.00214959	0.00265092	2.97012e-24	1.35749e-22	0.000501323
CENPN	clu_51370_?	i003	chr16:81017834-81020100	0.200819	0.258277	2.97012e-24	1.35749e-22	0.0574589
CENPN	clu_51370_?	i004	chr16:81017834-81022755	0.00253696	0.00198951	2.97012e-24	1.35749e-22	-0.000547451
CENPN	clu_51370_?	i005	chr16:81020276-81022597	0.0336735	0.0374627	2.97012e-24	1.35749e-22	0.00378925
CENPN	clu_51370_?	i006	chr16:81020276-81022755	0.671099	0.591227	2.97012e-24	1.35749e-22	-0.0798715
CENPN	clu_51370_?	i007	chr16:81020276-81024715	0.00580376	0.00476523	2.97012e-24	1.35749e-22	-0.00103853
CENPN	clu_51370_?	i008	chr16:81022652-81022727	0.00390105	0.00335269	2.97012e-24	1.35749e-22	-0.000548359
CENPN	clu_51370_?	i009	chr16:81022652-81022755	0.00396982	0.00513795	2.97012e-24	1.35749e-22	0.00116813
CENPN	clu_51370_?	i010	chr16:81022698-81024715	0.0202824	0.0213119	2.97012e-24	1.35749e-22	0.00102953
METTL5	clu_13609_?	i001	chr2:169811858-169812457	0.298499	0.282666	3.09386e-24	1.40255e-22	-0.0158333
METTL5	clu_13609_?	i002	chr2:169811858-169815477	0.00162823	0.00167254	3.09386e-24	1.40255e-22	4.43103e-05
METTL5	clu_13609_?	i003	chr2:169812506-169815477	0.362989	0.355273	3.09386e-24	1.40255e-22	-0.00771651
METTL5	clu_13609_?	i004	chr2:169812506-169819561	0.00849587	0.00886877	3.09386e-24	1.40255e-22	0.000372898
METTL5	clu_13609_?	i005	chr2:169812524-169815477	0.00665199	0.00638633	3.09386e-24	1.40255e-22	-0.000265659
METTL5	clu_13609_?	i006	chr2:169815528-169819561	0.321736	0.345134	3.09386e-24	1.40255e-22	0.0233982
PAK1IP1	clu_55128_?	i001	chr6:10695069-10697321	0.0682956	0.0548739	3.59459e-24	1.61641e-22	-0.0134217
PAK1IP1	clu_55128_?	i002	chr6:10695069-10697324	0.319879	0.2532	3.59459e-24	1.61641e-22	-0.0666795
PAK1IP1	clu_55128_?	i003	chr6:10695069-10702369	0.00571153	0.00459122	3.59459e-24	1.61641e-22	-0.0011203
PAK1IP1	clu_55128_?	i004	chr6:10695548-10697324	0.00364771	0.00294119	3.59459e-24	1.61641e-22	-0.00070652
PAK1IP1	clu_55128_?	i005	chr6:10697486-10702369	0.602466	0.684394	3.59459e-24	1.61641e-22	0.081928
TRAF3	clu_27069_?	i001	chr14:102876525-102886189	0.156035	0.197442	1.06104e-23	4.73307e-22	0.0414073
TRAF3	clu_27069_?	i002	chr14:102876525-102889560	0.00336806	0.00339551	1.06104e-23	4.73307e-22	2.745e-05
TRAF3	clu_27069_?	i003	chr14:102876525-102891325	0.0101677	0.00932847	1.06104e-23	4.73307e-22	-0.000839211
TRAF3	clu_27069_?	i004	chr14:102876525-102897261	0.00376903	0.00518164	1.06104e-23	4.73307e-22	0.00141262
TRAF3	clu_27069_?	i005	chr14:102886269-102889560	0.302041	0.303778	1.06104e-23	4.73307e-22	0.00173676
TRAF3	clu_27069_?	i006	chr14:102886269-102891325	0.0308345	0.0384206	1.06104e-23	4.73307e-22	0.0075861
TRAF3	clu_27069_?	i007	chr14:102886269-102897261	0.00282764	0.00416446	1.06104e-23	4.73307e-22	0.00133682
TRAF3	clu_27069_?	i008	chr14:102889634-102891325	0.346783	0.309923	1.06104e-23	4.73307e-22	-0.0368597
TRAF3	clu_27069_?	i009	chr14:102891417-102894484	0.00219494	0.0019528	1.06104e-23	4.73307e-22	-0.000242134
TRAF3	clu_27069_?	i010	chr14:102891417-102895073	0.00441605	0.00401195	1.06104e-23	4.73307e-22	-0.000404095
TRAF3	clu_27069_?	i011	chr14:102891417-102895119	0.00161923	0.00143899	1.06104e-23	4.73307e-22	-0.000180238
TRAF3	clu_27069_?	i012	chr14:102891417-102897261	0.135944	0.120962	1.06104e-23	4.73307e-22	-0.0149817
LARS	clu_19981_?	i001	chr5:146164471-146168128	0.311276	0.391703	1.34408e-23	5.94807e-22	0.0804271
LARS	clu_19981_?	i002	chr5:146164471-146171910	0.0154837	0.0210777	1.34408e-23	5.94807e-22	0.00559396
LARS	clu_19981_?	i003	chr5:146168265-146171910	0.67324	0.587219	1.34408e-23	5.94807e-22	-0.086021
ITGB3BP	clu_39363_?	i001	chr1:63478833-63490083	0.0879941	0.120334	1.77153e-23	7.778e-22	0.0323395
ITGB3BP	clu_39363_?	i002	chr1:63478833-63508528	0.00228185	0.00280475	1.77153e-23	7.778e-22	0.000522899
ITGB3BP	clu_39363_?	i003	chr1:63486773-63490083	0.00475819	0.00752012	1.77153e-23	7.778e-22	0.00276193
ITGB3BP	clu_39363_?	i004	chr1:63490218-63508528	0.31341	0.30931	1.77153e-23	7.778e-22	-0.00409996
ITGB3BP	clu_39363_?	i005	chr1:63490218-63523129	0.0137902	0.01007	1.77153e-23	7.778e-22	-0.00372018
ITGB3BP	clu_39363_?	i006	chr1:63508570-63510065	0.0109738	0.0171384	1.77153e-23	7.778e-22	0.00616451
ITGB3BP	clu_39363_?	i007	chr1:63508570-63523110	0.00273738	0.0035158	1.77153e-23	7.778e-22	0.000778418
ITGB3BP	clu_39363_?	i008	chr1:63508570-63523125	0.00412803	0.00437541	1.77153e-23	7.778e-22	0.000247384
ITGB3BP	clu_39363_?	i009	chr1:63508570-63523129	0.550702	0.514861	1.77153e-23	7.778e-22	-0.0358407
ITGB3BP	clu_39363_?	i010	chr1:63510181-63523129	0.00922416	0.0100704	1.77153e-23	7.778e-22	0.000846248
RPLP0	clu_30285_?	i001	chr12:120197462-120198554	0.876032	0.921066	2.24385e-23	9.77225e-22	0.0450335
RPLP0	clu_30285_?	i002	chr12:120197462-120198854	0.0172305	0.0193824	2.24385e-23	9.77225e-22	0.00215191
RPLP0	clu_30285_?	i003	chr12:120198739-120198854	0.106737	0.0595518	2.24385e-23	9.77225e-22	-0.0471854
ACADM	clu_39471_?	i001	chr1:75724817-75728401	0.430109	0.328288	2.2608e-23	9.77225e-22	-0.10182
ACADM	clu_39471_?	i002	chr1:75724817-75732644	0.0461478	0.0371887	2.2608e-23	9.77225e-22	-0.00895901
ACADM	clu_39471_?	i003	chr1:75728488-75732644	0.523743	0.634523	2.2608e-23	9.77225e-22	0.110779
CSDE1	clu_40160_?	i001	chr1:114738072-114739692	0.70337	0.706002	2.35971e-23	1.01213e-21	0.00263144
CSDE1	clu_40160_?	i002	chr1:114738072-114749821	0.0110222	0.01281	2.35971e-23	1.01213e-21	0.00178779
CSDE1	clu_40160_?	i003	chr1:114738072-114757925	0.00152715	0.00110115	2.35971e-23	1.01213e-21	-0.000426002
CSDE1	clu_40160_?	i004	chr1:114739890-114749821	0.166194	0.202987	2.35971e-23	1.01213e-21	0.0367929
CSDE1	clu_40160_?	i005	chr1:114739890-114757925	0.0115907	0.00953313	2.35971e-23	1.01213e-21	-0.00205757
CSDE1	clu_40160_?	i006	chr1:114741673-114749821	0.000955009	0.000819324	2.35971e-23	1.01213e-21	-0.000135685
CSDE1	clu_40160_?	i007	chr1:114750207-114757925	0.104223	0.0654303	2.35971e-23	1.01213e-21	-0.0387928
CSDE1	clu_40160_?	i008	chr1:114756888-114757925	0.00111763	0.00131755	2.35971e-23	1.01213e-21	0.000199923
ZCCHC10	clu_19574_?	i001	chr5:133006920-133007794	0.00127603	0.00166956	2.55426e-23	1.08722e-21	0.000393527
ZCCHC10	clu_19574_?	i002	chr5:133006920-133011339	0.00185946	0.00147078	2.55426e-23	1.08722e-21	-0.000388684
ZCCHC10	clu_19574_?	i003	chr5:133006920-133022811	0.00237072	0.0027798	2.55426e-23	1.08722e-21	0.000409081
ZCCHC10	clu_19574_?	i004	chr5:133006920-133022841	0.111833	0.110673	2.55426e-23	1.08722e-21	-0.00115997
ZCCHC10	clu_19574_?	i005	chr5:133006920-133026493	0.00189246	0.00130864	2.55426e-23	1.08722e-21	-0.000583823
ZCCHC10	clu_19574_?	i006	chr5:133006920-133026497	0.152506	0.10175	2.55426e-23	1.08722e-21	-0.050756
ZCCHC10	clu_19574_?	i007	chr5:133007889-133022841	0.000943435	0.00123009	2.55426e-23	1.08722e-21	0.000286652
ZCCHC10	clu_19574_?	i008	chr5:133011455-133026497	0.00123491	0.0015592	2.55426e-23	1.08722e-21	0.000324288
ZCCHC10	clu_19574_?	i009	chr5:133019203-133022811	0.0130558	0.0173465	2.55426e-23	1.08722e-21	0.0042907
ZCCHC10	clu_19574_?	i010	chr5:133019203-133022841	0.171756	0.199316	2.55426e-23	1.08722e-21	0.0275597
ZCCHC10	clu_19574_?	i011	chr5:133019203-133026497	0.00946313	0.00841691	2.55426e-23	1.08722e-21	-0.00104623
ZCCHC10	clu_19574_?	i012	chr5:133022906-133026493	0.00249124	0.00252654	2.55426e-23	1.08722e-21	3.52926e-05
ZCCHC10	clu_19574_?	i013	chr5:133022906-133026497	0.529317	0.549952	2.55426e-23	1.08722e-21	0.0206354
ERCC1	clu_24123_?	i001	chr19:45409725-45413677	0.345758	0.31376	2.62868e-23	1.11042e-21	-0.0319982
ERCC1	clu_24123_?	i002	chr19:45409725-45416821	0.010469	0.00985005	2.62868e-23	1.11042e-21	-0.00061897
ERCC1	clu_24123_?	i003	chr19:45413745-45413963	0.337725	0.3365	2.62868e-23	1.11042e-21	-0.00122559
ERCC1	clu_24123_?	i004	chr19:45413745-45414861	0.0849162	0.0842108	2.62868e-23	1.11042e-21	-0.000705409
ERCC1	clu_24123_?	i005	chr19:45413745-45416821	0.00223138	0.00217771	2.62868e-23	1.11042e-21	-5.36713e-05
ERCC1	clu_24123_?	i006	chr19:45414034-45414861	0.165197	0.187519	2.62868e-23	1.11042e-21	0.0223214
ERCC1	clu_24123_?	i007	chr19:45414960-45416821	0.0537025	0.0659829	2.62868e-23	1.11042e-21	0.0122804
RBPJ	clu_35080_?	i001	chr4:26319770-26320700	0.00230577	0.0022245	2.74816e-23	1.15216e-21	-8.12692e-05
RBPJ	clu_35080_?	i002	chr4:26319888-26320700	0.00644117	0.00580695	2.74816e-23	1.15216e-21	-0.000634219
RBPJ	clu_35080_?	i003	chr4:26319888-26386353	0.00477088	0.00320747	2.74816e-23	1.15216e-21	-0.00156341
RBPJ	clu_35080_?	i004	chr4:26320815-26362446	0.0181472	0.0250231	2.74816e-23	1.15216e-21	0.0068759
RBPJ	clu_35080_?	i005	chr4:26320815-26386353	0.0928001	0.0768206	2.74816e-23	1.15216e-21	-0.0159795
RBPJ	clu_35080_?	i006	chr4:26321048-26362446	0.0965534	0.109605	2.74816e-23	1.15216e-21	0.0130516
RBPJ	clu_35080_?	i007	chr4:26321048-26386353	0.389503	0.32799	2.74816e-23	1.15216e-21	-0.0615131
RBPJ	clu_35080_?	i008	chr4:26321871-26386353	0.00354107	0.00241053	2.74816e-23	1.15216e-21	-0.00113053
RBPJ	clu_35080_?	i009	chr4:26362628-26386353	0.385937	0.446911	2.74816e-23	1.15216e-21	0.0609745
SHLD2	clu_7926_?	i001	chr10:87094757-87096934	0.00596946	0.00826856	3.97939e-23	1.6559e-21	0.0022991
SHLD2	clu_7926_?	i002	chr10:87094757-87151350	0.00175572	0.00276981	3.97939e-23	1.6559e-21	0.00101409
SHLD2	clu_7926_?	i003	chr10:87094788-87096934	0.0322312	0.0312238	3.97939e-23	1.6559e-21	-0.00100741
SHLD2	clu_7926_?	i004	chr10:87094788-87151350	0.0031414	0.00214778	3.97939e-23	1.6559e-21	-0.000993629
SHLD2	clu_7926_?	i005	chr10:87095248-87096934	0.390642	0.314213	3.97939e-23	1.6559e-21	-0.0764287
SHLD2	clu_7926_?	i006	chr10:87095248-87151350	0.00565697	0.00468729	3.97939e-23	1.6559e-21	-0.000969679
SHLD2	clu_7926_?	i007	chr10:87096989-87100573	0.00398323	0.00496184	3.97939e-23	1.6559e-21	0.000978613
SHLD2	clu_7926_?	i008	chr10:87096989-87103648	0.00372856	0.00461448	3.97939e-23	1.6559e-21	0.000885917
SHLD2	clu_7926_?	i009	chr10:87096989-87104682	0.00190753	0.0019799	3.97939e-23	1.6559e-21	7.23633e-05
SHLD2	clu_7926_?	i010	chr10:87096989-87121792	0.00322303	0.00588447	3.97939e-23	1.6559e-21	0.00266144
SHLD2	clu_7926_?	i011	chr10:87096989-87130624	0.00160171	0.0020226	3.97939e-23	1.6559e-21	0.000420891
SHLD2	clu_7926_?	i012	chr10:87096989-87137605	0.00450351	0.00355299	3.97939e-23	1.6559e-21	-0.000950522
SHLD2	clu_7926_?	i013	chr10:87096989-87137611	0.00195106	0.0016796	3.97939e-23	1.6559e-21	-0.000271457
SHLD2	clu_7926_?	i014	chr10:87096989-87151350	0.305259	0.264269	3.97939e-23	1.6559e-21	-0.0409899
SHLD2	clu_7926_?	i015	chr10:87096989-87158048	0.00161502	0.00283139	3.97939e-23	1.6559e-21	0.00121637
SHLD2	clu_7926_?	i016	chr10:87096989-87170478	0.00233612	0.00165577	3.97939e-23	1.6559e-21	-0.000680347
SHLD2	clu_7926_?	i017	chr10:87100620-87151350	0.0024269	0.00180825	3.97939e-23	1.6559e-21	-0.000618651
SHLD2	clu_7926_?	i018	chr10:87103713-87151350	0.00117277	0.00687127	3.97939e-23	1.6559e-21	0.0056985
SHLD2	clu_7926_?	i019	chr10:87104962-87151350	0.0153326	0.0166934	3.97939e-23	1.6559e-21	0.00136084
SHLD2	clu_7926_?	i020	chr10:87121907-87151350	0.00611754	0.00586195	3.97939e-23	1.6559e-21	-0.000255587
SHLD2	clu_7926_?	i021	chr10:87124887-87151350	0.00105777	0.00316949	3.97939e-23	1.6559e-21	0.00211172
SHLD2	clu_7926_?	i022	chr10:87130673-87151350	0.00216594	0.00330004	3.97939e-23	1.6559e-21	0.0011341
SHLD2	clu_7926_?	i023	chr10:87151126-87151350	0.00492276	0.0136172	3.97939e-23	1.6559e-21	0.00869447
SHLD2	clu_7926_?	i024	chr10:87152879-87158048	0.0262618	0.0414537	3.97939e-23	1.6559e-21	0.0151918
SHLD2	clu_7926_?	i025	chr10:87158155-87170478	0.171037	0.250462	3.97939e-23	1.6559e-21	0.0794256
SERF2,HYPK	clu_9472_?	i001	chr15:43800784-43801132	0.282647	0.308881	1.21444e-22	5.01607e-21	0.0262333
SERF2,HYPK	clu_9472_?	i002	chr15:43800784-43801518	0.00574538	0.00551174	1.21444e-22	5.01607e-21	-0.000233642
SERF2,HYPK	clu_9472_?	i003	chr15:43801187-43801518	0.711607	0.685608	1.21444e-22	5.01607e-21	-0.0259996
DNAJC19	clu_60965_?	i001	chr3:180985996-180986943	0.44741	0.474871	1.26236e-22	5.17569e-21	0.0274609
DNAJC19	clu_60965_?	i002	chr3:180985996-180986948	0.00279244	0.00247486	1.26236e-22	5.17569e-21	-0.000317577
DNAJC19	clu_60965_?	i003	chr3:180985996-180986998	0.0394307	0.0426491	1.26236e-22	5.17569e-21	0.00321838
DNAJC19	clu_60965_?	i004	chr3:180985996-180988023	0.0792443	0.0724561	1.26236e-22	5.17569e-21	-0.00678828
DNAJC19	clu_60965_?	i005	chr3:180985996-180989600	0.0045611	0.00373932	1.26236e-22	5.17569e-21	-0.000821773
DNAJC19	clu_60965_?	i006	chr3:180987022-180988023	0.198258	0.213786	1.26236e-22	5.17569e-21	0.0155282
DNAJC19	clu_60965_?	i007	chr3:180988096-180988178	0.112082	0.102781	1.26236e-22	5.17569e-21	-0.00930139
DNAJC19	clu_60965_?	i008	chr3:180988096-180989600	0.00217254	0.00236412	1.26236e-22	5.17569e-21	0.000191579
DNAJC19	clu_60965_?	i009	chr3:180988229-180989600	0.114048	0.0848782	1.26236e-22	5.17569e-21	-0.02917
ANAPC11	clu_34499_?	i001	chr17:81891833-81893552	0.0217615	0.0109387	2.17072e-22	8.83498e-21	-0.0108228
ANAPC11	clu_34499_?	i002	chr17:81891833-81894467	0.0380973	0.0260899	2.17072e-22	8.83498e-21	-0.0120074
ANAPC11	clu_34499_?	i003	chr17:81891841-81893552	0.0226245	0.0147351	2.17072e-22	8.83498e-21	-0.00788937
ANAPC11	clu_34499_?	i004	chr17:81891841-81894467	0.0360835	0.0227075	2.17072e-22	8.83498e-21	-0.0133759
ANAPC11	clu_34499_?	i005	chr17:81891863-81893552	0.0059293	0.00366981	2.17072e-22	8.83498e-21	-0.00225949
ANAPC11	clu_34499_?	i006	chr17:81891863-81894467	0.00663311	0.00587221	2.17072e-22	8.83498e-21	-0.000760905
ANAPC11	clu_34499_?	i007	chr17:81892106-81893552	0.00599602	0.00301998	2.17072e-22	8.83498e-21	-0.00297604
ANAPC11	clu_34499_?	i008	chr17:81892106-81894467	0.00425527	0.00278639	2.17072e-22	8.83498e-21	-0.00146888
ANAPC11	clu_34499_?	i009	chr17:81893187-81893552	0.000859832	0.000846656	2.17072e-22	8.83498e-21	-1.31759e-05
ANAPC11	clu_34499_?	i010	chr17:81893614-81894467	0.029098	0.0283322	2.17072e-22	8.83498e-21	-0.000765764
ANAPC11	clu_34499_?	i011	chr17:81893614-81899920	0.00372381	0.00363571	2.17072e-22	8.83498e-21	-8.80996e-05
ANAPC11	clu_34499_?	i012	chr17:81894586-81899920	0.798787	0.846213	2.17072e-22	8.83498e-21	0.0474261
ANAPC11	clu_34499_?	i013	chr17:81894624-81899920	0.0218684	0.0271059	2.17072e-22	8.83498e-21	0.00523747
ANAPC11	clu_34499_?	i014	chr17:81894860-81899920	0.00242181	0.00218841	2.17072e-22	8.83498e-21	-0.000233395
ANAPC11	clu_34499_?	i015	chr17:81899542-81899920	0.00186047	0.00185813	2.17072e-22	8.83498e-21	-2.34e-06
RNMT	clu_43059_?	i001	chr18:13726729-13730627	0.200501	0.144241	2.64319e-22	1.068e-20	-0.0562598
RNMT	clu_43059_?	i002	chr18:13726729-13731476	0.23075	0.194923	2.64319e-22	1.068e-20	-0.0358273
RNMT	clu_43059_?	i003	chr18:13726729-13734464	0.00144344	0.00169207	2.64319e-22	1.068e-20	0.000248628
RNMT	clu_43059_?	i004	chr18:13730755-13731476	0.247126	0.296391	2.64319e-22	1.068e-20	0.0492653
RNMT	clu_43059_?	i005	chr18:13730755-13734464	0.00758731	0.00887979	2.64319e-22	1.068e-20	0.00129248
RNMT	clu_43059_?	i006	chr18:13731934-13734464	0.312593	0.353873	2.64319e-22	1.068e-20	0.0412807
GTF2I	clu_45130_?	i001	chr7:74650796-74651193	0.0294196	0.0308164	2.73005e-22	1.09516e-20	0.00139682
GTF2I	clu_45130_?	i002	chr7:74650796-74689124	0.00775731	0.00751548	2.73005e-22	1.09516e-20	-0.000241829
GTF2I	clu_45130_?	i003	chr7:74658068-74689124	0.342246	0.384332	2.73005e-22	1.09516e-20	0.0420865
GTF2I	clu_45130_?	i004	chr7:74658068-74690973	0.00429931	0.00435334	2.73005e-22	1.09516e-20	5.40323e-05
GTF2I	clu_45130_?	i005	chr7:74664576-74689124	0.00267613	0.00294536	2.73005e-22	1.09516e-20	0.000269232
GTF2I	clu_45130_?	i006	chr7:74674345-74689124	0.00691836	0.00825103	2.73005e-22	1.09516e-20	0.00133268
GTF2I	clu_45130_?	i007	chr7:74689227-74690973	0.606684	0.561786	2.73005e-22	1.09516e-20	-0.0448974
FBXW11	clu_20376_?	i001	chr5:171910797-171914343	0.217416	0.203028	2.80433e-22	1.11692e-20	-0.0143882
FBXW11	clu_20376_?	i002	chr5:171910797-171957597	0.00173175	0.000356945	2.80433e-22	1.11692e-20	-0.0013748
FBXW11	clu_20376_?	i003	chr5:171910797-171977636	0.00600266	0.00301944	2.80433e-22	1.11692e-20	-0.00298322
FBXW11	clu_20376_?	i004	chr5:171910797-171996890	0.038127	0.0415345	2.80433e-22	1.11692e-20	0.00340753
FBXW11	clu_20376_?	i005	chr5:171910797-172006458	0.0517523	0.0367854	2.80433e-22	1.11692e-20	-0.0149669
FBXW11	clu_20376_?	i006	chr5:171914405-171927821	0.00177891	0.00113642	2.80433e-22	1.11692e-20	-0.000642492
FBXW11	clu_20376_?	i007	chr5:171914405-171957597	0.0144791	0.0128531	2.80433e-22	1.11692e-20	-0.00162602
FBXW11	clu_20376_?	i008	chr5:171914405-171977636	0.0384531	0.0210694	2.80433e-22	1.11692e-20	-0.0173837
FBXW11	clu_20376_?	i009	chr5:171914405-171996890	0.20807	0.249391	2.80433e-22	1.11692e-20	0.0413218
FBXW11	clu_20376_?	i010	chr5:171914405-172003181	0.0100376	0.00841638	2.80433e-22	1.11692e-20	-0.00162119
FBXW11	clu_20376_?	i011	chr5:171914405-172003183	0.00123547	0.00149175	2.80433e-22	1.11692e-20	0.000256282
FBXW11	clu_20376_?	i012	chr5:171914405-172006458	0.255573	0.220244	2.80433e-22	1.11692e-20	-0.0353286
FBXW11	clu_20376_?	i013	chr5:171957698-171996890	0.0024189	0.00314396	2.80433e-22	1.11692e-20	0.000725054
FBXW11	clu_20376_?	i014	chr5:171957698-172006458	0.0107114	0.0123061	2.80433e-22	1.11692e-20	0.00159463
FBXW11	clu_20376_?	i015	chr5:171997051-172003181	0.00239211	0.00306459	2.80433e-22	1.11692e-20	0.000672477
FBXW11	clu_20376_?	i016	chr5:171997051-172006458	0.132667	0.172906	2.80433e-22	1.11692e-20	0.0402387
FBXW11	clu_20376_?	i017	chr5:172003310-172006458	0.00715454	0.00925305	2.80433e-22	1.11692e-20	0.00209851
MACC1	clu_44027_?	i001	chr7:20161870-20164256	0.0251009	0.0379924	3.00859e-22	1.18978e-20	0.0128915
MACC1	clu_44027_?	i002	chr7:20161870-20170714	0.0478087	0.0726672	3.00859e-22	1.18978e-20	0.0248585
MACC1	clu_44027_?	i003	chr7:20161870-20184989	0.00187817	0.00285093	3.00859e-22	1.18978e-20	0.00097276
MACC1	clu_44027_?	i004	chr7:20161870-20198525	0.00770912	0.00920711	3.00859e-22	1.18978e-20	0.001498
MACC1	clu_44027_?	i005	chr7:20161870-20217299	0.0421236	0.047114	3.00859e-22	1.18978e-20	0.0049904
MACC1	clu_44027_?	i006	chr7:20164399-20168385	0.00379098	0.00310354	3.00859e-22	1.18978e-20	-0.000687442
MACC1	clu_44027_?	i007	chr7:20164399-20170714	0.13319	0.122116	3.00859e-22	1.18978e-20	-0.0110732
MACC1	clu_44027_?	i008	chr7:20164399-20198525	0.0017656	0.00180264	3.00859e-22	1.18978e-20	3.70392e-05
MACC1	clu_44027_?	i009	chr7:20164399-20217299	0.00576989	0.00276414	3.00859e-22	1.18978e-20	-0.00300575
MACC1	clu_44027_?	i010	chr7:20166889-20170714	0.00171774	0.00126073	3.00859e-22	1.18978e-20	-0.000457007
MACC1	clu_44027_?	i011	chr7:20167986-20170714	0.00170296	0.00133799	3.00859e-22	1.18978e-20	-0.000364966
MACC1	clu_44027_?	i012	chr7:20168421-20170714	0.00625204	0.00616129	3.00859e-22	1.18978e-20	-9.07595e-05
MACC1	clu_44027_?	i013	chr7:20168517-20170714	0.00139983	0.00110407	3.00859e-22	1.18978e-20	-0.000295756
MACC1	clu_44027_?	i014	chr7:20170778-20177804	0.0177199	0.0186439	3.00859e-22	1.18978e-20	0.000923926
MACC1	clu_44027_?	i015	chr7:20170778-20184989	0.015813	0.0156556	3.00859e-22	1.18978e-20	-0.000157369
MACC1	clu_44027_?	i016	chr7:20170778-20198525	0.0166249	0.0175986	3.00859e-22	1.18978e-20	0.000973689
MACC1	clu_44027_?	i017	chr7:20170778-20217299	0.077489	0.0585091	3.00859e-22	1.18978e-20	-0.01898
MACC1	clu_44027_?	i018	chr7:20170781-20177804	0.0188826	0.0192135	3.00859e-22	1.18978e-20	0.00033091
MACC1	clu_44027_?	i019	chr7:20170781-20184989	0.0753079	0.0760282	3.00859e-22	1.18978e-20	0.000720265
MACC1	clu_44027_?	i020	chr7:20170781-20198525	0.03984	0.0373472	3.00859e-22	1.18978e-20	-0.00249274
MACC1	clu_44027_?	i021	chr7:20170781-20217299	0.144794	0.118125	3.00859e-22	1.18978e-20	-0.0266685
MACC1	clu_44027_?	i022	chr7:20177930-20178411	0.00181989	0.00275717	3.00859e-22	1.18978e-20	0.000937272
MACC1	clu_44027_?	i023	chr7:20177930-20184989	0.0213947	0.0294605	3.00859e-22	1.18978e-20	0.00806579
MACC1	clu_44027_?	i024	chr7:20177930-20198525	0.00139018	0.00208641	3.00859e-22	1.18978e-20	0.000696227
MACC1	clu_44027_?	i025	chr7:20177930-20217299	0.0108175	0.00912562	3.00859e-22	1.18978e-20	-0.00169191
MACC1	clu_44027_?	i026	chr7:20180438-20217299	0.00150651	0.00221507	3.00859e-22	1.18978e-20	0.000708565
MACC1	clu_44027_?	i027	chr7:20185078-20198525	0.0391704	0.0498551	3.00859e-22	1.18978e-20	0.0106847
MACC1	clu_44027_?	i028	chr7:20185078-20217299	0.149934	0.139261	3.00859e-22	1.18978e-20	-0.0106732
MACC1	clu_44027_?	i029	chr7:20198670-20217299	0.0862008	0.0930515	3.00859e-22	1.18978e-20	0.00685066
MACC1	clu_44027_?	i030	chr7:20212938-20217299	0.00108597	0.00158423	3.00859e-22	1.18978e-20	0.000498268
ZCCHC9	clu_18948_?	i001	chr5:81301670-81304741	0.363479	0.333647	4.16723e-22	1.63637e-20	-0.0298315
ZCCHC9	clu_18948_?	i002	chr5:81301670-81308561	0.00157799	0.001631	4.16723e-22	1.63637e-20	5.30182e-05
ZCCHC9	clu_18948_?	i003	chr5:81301698-81304121	0.00154413	0.00210688	4.16723e-22	1.63637e-20	0.000562755
ZCCHC9	clu_18948_?	i004	chr5:81301698-81304741	0.599929	0.596168	4.16723e-22	1.63637e-20	-0.00376119
ZCCHC9	clu_18948_?	i005	chr5:81301698-81308561	0.00189057	0.00148573	4.16723e-22	1.63637e-20	-0.000404845
ZCCHC9	clu_18948_?	i006	chr5:81301967-81304741	0.0113489	0.0213246	4.16723e-22	1.63637e-20	0.0099757
ZCCHC9	clu_18948_?	i007	chr5:81302055-81304741	0.0115209	0.0198945	4.16723e-22	1.63637e-20	0.00837366
ZCCHC9	clu_18948_?	i008	chr5:81304203-81304741	0.00217581	0.00374052	4.16723e-22	1.63637e-20	0.00156471
ZCCHC9	clu_18948_?	i009	chr5:81305141-81308561	0.00653379	0.0200015	4.16723e-22	1.63637e-20	0.0134677
TP53TG1	clu_45430_?	i001	chr7:87325444-87326263	0.00382902	0.00244438	5.06241e-22	1.97399e-20	-0.00138465
TP53TG1	clu_45430_?	i002	chr7:87325444-87326267	0.00317286	0.00457261	5.06241e-22	1.97399e-20	0.00139976
TP53TG1	clu_45430_?	i003	chr7:87325444-87329935	0.00535912	0.00483209	5.06241e-22	1.97399e-20	-0.000527027
TP53TG1	clu_45430_?	i004	chr7:87325444-87341523	0.659349	0.600374	5.06241e-22	1.97399e-20	-0.0589756
TP53TG1	clu_45430_?	i005	chr7:87325444-87341638	0.0024624	0.00228708	5.06241e-22	1.97399e-20	-0.000175325
TP53TG1	clu_45430_?	i006	chr7:87325444-87341653	0.00143483	0.0013198	5.06241e-22	1.97399e-20	-0.000115039
TP53TG1	clu_45430_?	i007	chr7:87325444-87345043	0.000978206	0.00210878	5.06241e-22	1.97399e-20	0.00113057
TP53TG1	clu_45430_?	i008	chr7:87326449-87341523	0.00202174	0.00439314	5.06241e-22	1.97399e-20	0.0023714
TP53TG1	clu_45430_?	i009	chr7:87330094-87341523	0.00193933	0.00164429	5.06241e-22	1.97399e-20	-0.000295046
TP53TG1	clu_45430_?	i010	chr7:87341684-87345043	0.192537	0.237141	5.06241e-22	1.97399e-20	0.0446041
TP53TG1	clu_45430_?	i011	chr7:87341684-87345234	0.0130892	0.0154284	5.06241e-22	1.97399e-20	0.00233913
TP53TG1	clu_45430_?	i012	chr7:87341684-87345305	0.111622	0.121581	5.06241e-22	1.97399e-20	0.00995836
TP53TG1	clu_45430_?	i013	chr7:87345233-87345305	0.00220429	0.00187366	5.06241e-22	1.97399e-20	-0.00033063
MRPS31	clu_15407_?	i001	chr13:40757013-40758948	0.80637	0.739854	9.58173e-22	3.71026e-20	-0.0665166
MRPS31	clu_15407_?	i002	chr13:40757013-40766746	0.00372728	0.00345737	9.58173e-22	3.71026e-20	-0.00026991
MRPS31	clu_15407_?	i003	chr13:40759106-40766746	0.189902	0.256689	9.58173e-22	3.71026e-20	0.0667866
TBC1D22A	clu_6434_?	i001	chr22:46793841-46797444	0.21735	0.28562	9.72427e-22	3.73948e-20	0.06827
TBC1D22A	clu_6434_?	i002	chr22:46793841-46878653	0.0103074	0.0079013	9.72427e-22	3.73948e-20	-0.00240609
TBC1D22A	clu_6434_?	i003	chr22:46797620-46878653	0.562442	0.527573	9.72427e-22	3.73948e-20	-0.0348693
TBC1D22A	clu_6434_?	i004	chr22:46797620-46891266	0.00490062	0.00327707	9.72427e-22	3.73948e-20	-0.00162355
TBC1D22A	clu_6434_?	i005	chr22:46878723-46891266	0.204999	0.175628	9.72427e-22	3.73948e-20	-0.029371
ASCC3	clu_57282_?	i001	chr6:100805880-100806017	0.00319882	0.00420695	1.38427e-21	5.28677e-20	0.00100814
ASCC3	clu_57282_?	i002	chr6:100805880-100848148	0.267483	0.309241	1.38427e-21	5.28677e-20	0.041758
ASCC3	clu_57282_?	i003	chr6:100805880-100864064	0.00286874	0.00375329	1.38427e-21	5.28677e-20	0.000884553
ASCC3	clu_57282_?	i004	chr6:100848707-100864064	0.0860302	0.114468	1.38427e-21	5.28677e-20	0.0284381
ASCC3	clu_57282_?	i005	chr6:100848707-100867908	0.00305116	0.00270214	1.38427e-21	5.28677e-20	-0.000349017
ASCC3	clu_57282_?	i006	chr6:100859199-100864064	0.00330992	0.00303647	1.38427e-21	5.28677e-20	-0.000273448
ASCC3	clu_57282_?	i007	chr6:100859202-100864064	0.0642165	0.0702848	1.38427e-21	5.28677e-20	0.00606832
ASCC3	clu_57282_?	i008	chr6:100864214-100867893	0.0162312	0.0148853	1.38427e-21	5.28677e-20	-0.00134589
ASCC3	clu_57282_?	i009	chr6:100864214-100867908	0.55361	0.477421	1.38427e-21	5.28677e-20	-0.0761888
EIF2AK2	clu_11557_?	i001	chr2:37109295-37111082	0.0102857	0.00955491	1.48286e-21	5.62477e-20	-0.000730805
EIF2AK2	clu_11557_?	i002	chr2:37109295-37114731	0.709235	0.658928	1.48286e-21	5.62477e-20	-0.0503069
EIF2AK2	clu_11557_?	i003	chr2:37109295-37119959	0.0216172	0.0216279	1.48286e-21	5.62477e-20	1.06945e-05
EIF2AK2	clu_11557_?	i004	chr2:37111139-37114731	0.00876575	0.00814611	1.48286e-21	5.62477e-20	-0.000619649
EIF2AK2	clu_11557_?	i005	chr2:37114859-37119959	0.250096	0.301743	1.48286e-21	5.62477e-20	0.0516466
CCND2	clu_27454_?	i001	chr12:4278919-4279263	0.00195529	0.00198494	3.93607e-21	1.48294e-19	2.96539e-05
CCND2	clu_27454_?	i002	chr12:4278919-4285275	0.107629	0.156362	3.93607e-21	1.48294e-19	0.0487327
CCND2	clu_27454_?	i003	chr12:4278919-4288842	0.0559523	0.05534	3.93607e-21	1.48294e-19	-0.000612364
CCND2	clu_27454_?	i004	chr12:4278919-4299860	0.00678997	0.00611524	3.93607e-21	1.48294e-19	-0.000674734
CCND2	clu_27454_?	i005	chr12:4279372-4285275	0.00233319	0.00307136	3.93607e-21	1.48294e-19	0.000738168
CCND2	clu_27454_?	i006	chr12:4288990-4289313	0.00182316	0.00213043	3.93607e-21	1.48294e-19	0.000307266
CCND2	clu_27454_?	i007	chr12:4288990-4299860	0.823517	0.774996	3.93607e-21	1.48294e-19	-0.0485207
SNF8	clu_33139_?	i001	chr17:48930612-48931643	0.744562	0.716166	4.85325e-21	1.81622e-19	-0.0283957
SNF8	clu_33139_?	i002	chr17:48930612-48933205	0.00278986	0.00309907	4.85325e-21	1.81622e-19	0.000309217
SNF8	clu_33139_?	i003	chr17:48930612-48936170	0.00145163	0.00161261	4.85325e-21	1.81622e-19	0.000160975
SNF8	clu_33139_?	i004	chr17:48931714-48933205	0.0086293	0.00958731	4.85325e-21	1.81622e-19	0.000958011
SNF8	clu_33139_?	i005	chr17:48931717-48933205	0.223748	0.248624	4.85325e-21	1.81622e-19	0.0248753
SNF8	clu_33139_?	i006	chr17:48931717-48936170	0.00263357	0.00292636	4.85325e-21	1.81622e-19	0.000292786
SNF8	clu_33139_?	i007	chr17:48933346-48936170	0.0161856	0.017985	4.85325e-21	1.81622e-19	0.00179944
NDUFA12	clu_29491_?	i001	chr12:94971485-94994170	0.00291321	0.00195891	4.92629e-21	1.83127e-19	-0.000954303
NDUFA12	clu_29491_?	i002	chr12:94971485-95002806	0.0781018	0.0471967	4.92629e-21	1.83127e-19	-0.0309051
NDUFA12	clu_29491_?	i003	chr12:94971620-94974171	0.00343132	0.00368259	4.92629e-21	1.83127e-19	0.000251266
NDUFA12	clu_29491_?	i004	chr12:94971620-94994170	0.7409	0.761157	4.92629e-21	1.83127e-19	0.0202562
NDUFA12	clu_29491_?	i005	chr12:94971620-95002739	0.0388894	0.0368151	4.92629e-21	1.83127e-19	-0.00207431
NDUFA12	clu_29491_?	i006	chr12:94994257-95002739	0.135764	0.14919	4.92629e-21	1.83127e-19	0.0134263
MRPL13	clu_17547_?	i001	chr8:120396125-120413991	0.651381	0.721252	6.49653e-21	2.39898e-19	0.0698707
MRPL13	clu_17547_?	i002	chr8:120396125-120419852	0.00472033	0.0039646	6.49653e-21	2.39898e-19	-0.000755726
MRPL13	clu_17547_?	i003	chr8:120414112-120419852	0.343899	0.274784	6.49653e-21	2.39898e-19	-0.069115
CRCP	clu_44822_?	i001	chr7:66114914-66127704	0.0171442	0.00940036	7.23975e-21	2.65584e-19	-0.00774383
CRCP	clu_44822_?	i002	chr7:66114970-66127704	0.388545	0.243296	7.23975e-21	2.65584e-19	-0.145249
CRCP	clu_44822_?	i003	chr7:66114970-66145443	0.00888636	0.0104695	7.23975e-21	2.65584e-19	0.00158313
CRCP	clu_44822_?	i004	chr7:66134374-66145443	0.585424	0.736835	7.23975e-21	2.65584e-19	0.15141
H2AFV	clu_44595_?	i001	chr7:44830163-44835529	0.00428432	0.00414792	8.63304e-21	3.14626e-19	-0.000136403
H2AFV	clu_44595_?	i002	chr7:44834562-44835529	0.787247	0.816577	8.63304e-21	3.14626e-19	0.0293299
H2AFV	clu_44595_?	i003	chr7:44834562-44835643	0.00166407	0.00129245	8.63304e-21	3.14626e-19	-0.000371618
H2AFV	clu_44595_?	i004	chr7:44834562-44840899	0.0359239	0.0321694	8.63304e-21	3.14626e-19	-0.00375453
H2AFV	clu_44595_?	i005	chr7:44835658-44840899	0.0934865	0.0942437	8.63304e-21	3.14626e-19	0.000757201
H2AFV	clu_44595_?	i006	chr7:44835658-44843277	0.00380522	0.00238868	8.63304e-21	3.14626e-19	-0.00141654
H2AFV	clu_44595_?	i007	chr7:44835658-44847969	0.00132765	0.0011984	8.63304e-21	3.14626e-19	-0.000129252
H2AFV	clu_44595_?	i008	chr7:44841012-44843277	0.0276907	0.0211986	8.63304e-21	3.14626e-19	-0.00649209
H2AFV	clu_44595_?	i009	chr7:44841012-44847969	0.00665221	0.00408253	8.63304e-21	3.14626e-19	-0.00256968
H2AFV	clu_44595_?	i010	chr7:44843354-44847969	0.0379186	0.0227016	8.63304e-21	3.14626e-19	-0.0152169
RPS4Y1	clu_48560_?	i001	chrY:2854771-2865088	0.0921796	0.122298	1.04946e-20	3.79986e-19	0.0301182
RPS4Y1	clu_48560_?	i002	chrY:2854771-2866793	0.00188751	0.00179497	1.04946e-20	3.79986e-19	-9.25322e-05
RPS4Y1	clu_48560_?	i003	chrY:2865245-2866793	0.905933	0.875907	1.04946e-20	3.79986e-19	-0.0300257
LAMTOR2	clu_41021_?	i001	chr1:156055425-156057978	0.231053	0.262015	1.23121e-20	4.42918e-19	0.0309626
LAMTOR2	clu_41021_?	i002	chr1:156055425-156058315	0.0181801	0.0178686	1.23121e-20	4.42918e-19	-0.000311509
LAMTOR2	clu_41021_?	i003	chr1:156055675-156057978	0.00552501	0.00640414	1.23121e-20	4.42918e-19	0.00087913
LAMTOR2	clu_41021_?	i004	chr1:156055675-156058315	0.00328825	0.00316586	1.23121e-20	4.42918e-19	-0.000122381
LAMTOR2	clu_41021_?	i005	chr1:156058067-156058315	0.741954	0.710546	1.23121e-20	4.42918e-19	-0.0314078
ZNHIT1	clu_45908_?	i001	chr7:101218217-101218319	0.00645192	0.00885026	2.18751e-20	7.81893e-19	0.00239834
ZNHIT1	clu_45908_?	i002	chr7:101218217-101221633	0.000870911	0.00343869	2.18751e-20	7.81893e-19	0.00256778
ZNHIT1	clu_45908_?	i003	chr7:101218217-101222604	0.965394	0.944935	2.18751e-20	7.81893e-19	-0.0204585
ZNHIT1	clu_45908_?	i004	chr7:101218485-101222604	0.0196095	0.0283193	2.18751e-20	7.81893e-19	0.00870973
ZNHIT1	clu_45908_?	i005	chr7:101221796-101222604	0.00767389	0.0144565	2.18751e-20	7.81893e-19	0.00678262
ADAR	clu_40806_?	i001	chr1:154602248-154602385	0.322904	0.348663	2.45065e-20	8.7037e-19	0.0257598
ADAR	clu_40806_?	i002	chr1:154602248-154607992	0.0101535	0.0116697	2.45065e-20	8.7037e-19	0.00151622
ADAR	clu_40806_?	i003	chr1:154602248-154627855	0.00181072	0.00103739	2.45065e-20	8.7037e-19	-0.000773322
ADAR	clu_40806_?	i004	chr1:154602626-154606004	0.0204481	0.0283902	2.45065e-20	8.7037e-19	0.00794214
ADAR	clu_40806_?	i005	chr1:154602626-154606006	0.00294518	0.00476938	2.45065e-20	8.7037e-19	0.0018242
ADAR	clu_40806_?	i006	chr1:154602626-154607954	0.00265099	0.0018413	2.45065e-20	8.7037e-19	-0.000809688
ADAR	clu_40806_?	i007	chr1:154602626-154607992	0.222474	0.260737	2.45065e-20	8.7037e-19	0.0382628
ADAR	clu_40806_?	i008	chr1:154602626-154608751	0.0019133	0.00181832	2.45065e-20	8.7037e-19	-9.49761e-05
ADAR	clu_40806_?	i009	chr1:154602626-154627855	0.203648	0.112904	2.45065e-20	8.7037e-19	-0.0907443
ADAR	clu_40806_?	i010	chr1:154602626-154627954	0.0381226	0.0208937	2.45065e-20	8.7037e-19	-0.0172289
ADAR	clu_40806_?	i011	chr1:154606376-154607954	0.00130015	0.00313132	2.45065e-20	8.7037e-19	0.00183117
ADAR	clu_40806_?	i012	chr1:154606376-154607992	0.144248	0.177627	2.45065e-20	8.7037e-19	0.0333795
ADAR	clu_40806_?	i013	chr1:154606376-154627855	0.0140049	0.00753481	2.45065e-20	8.7037e-19	-0.00647007
ADAR	clu_40806_?	i014	chr1:154606376-154627954	0.00645534	0.00107705	2.45065e-20	8.7037e-19	-0.00537829
ADAR	clu_40806_?	i015	chr1:154606458-154607992	0.00319628	0.0160986	2.45065e-20	8.7037e-19	0.0129023
ADAR	clu_40806_?	i016	chr1:154625153-154627855	0.00372486	0.00180635	2.45065e-20	8.7037e-19	-0.00191851
RPL36A	clu_4347_?	i001	chrX:101391822-101395335	0.580791	0.60693	2.57157e-20	9.07537e-19	0.0261384
RPL36A	clu_4347_?	i002	chrX:101391822-101395728	0.00186412	0.00214183	2.57157e-20	9.07537e-19	0.000277703
RPL36A	clu_4347_?	i003	chrX:101395457-101395728	0.417345	0.390929	2.57157e-20	9.07537e-19	-0.0264161
EIF3J	clu_9501_?	i001	chr15:44537427-44538572	0.0215159	0.0220764	5.19706e-20	1.82257e-18	0.000560475
EIF3J	clu_9501_?	i002	chr15:44537427-44550876	0.727988	0.644238	5.19706e-20	1.82257e-18	-0.0837497
EIF3J	clu_9501_?	i003	chr15:44537427-44554553	0.00583731	0.00723938	5.19706e-20	1.82257e-18	0.00140206
EIF3J	clu_9501_?	i004	chr15:44551522-44554553	0.244659	0.326446	5.19706e-20	1.82257e-18	0.0817872
RAB2A	clu_16796_?	i001	chr8:60558923-60572046	0.289745	0.328895	6.8692e-20	2.39392e-18	0.0391505
RAB2A	clu_16796_?	i002	chr8:60558923-60584208	0.00132881	0.00142203	6.8692e-20	2.39392e-18	9.32197e-05
RAB2A	clu_16796_?	i003	chr8:60572113-60584208	0.707734	0.668466	6.8692e-20	2.39392e-18	-0.0392677
RAB2A	clu_16796_?	i004	chr8:60576297-60584208	0.00119272	0.0012166	6.8692e-20	2.39392e-18	2.38867e-05
PALM2-AKAP2	clu_2000_?	i001	chr9:110048855-110136127	0.0213674	0.0104826	7.50018e-20	2.59758e-18	-0.0108848
PALM2-AKAP2	clu_2000_?	i002	chr9:110048855-110168399	0.00185765	0.00208009	7.50018e-20	2.59758e-18	0.000222439
PALM2-AKAP2	clu_2000_?	i003	chr9:110138539-110156319	0.0561084	0.0347395	7.50018e-20	2.59758e-18	-0.021369
PALM2-AKAP2	clu_2000_?	i004	chr9:110138539-110168399	0.184786	0.12185	7.50018e-20	2.59758e-18	-0.062936
PALM2-AKAP2	clu_2000_?	i005	chr9:110148703-110156319	0.0595551	0.0795678	7.50018e-20	2.59758e-18	0.0200127
PALM2-AKAP2	clu_2000_?	i006	chr9:110148703-110168399	0.0278149	0.0333251	7.50018e-20	2.59758e-18	0.00551017
PALM2-AKAP2	clu_2000_?	i007	chr9:110156497-110168399	0.64851	0.717955	7.50018e-20	2.59758e-18	0.0694445
CSTB	clu_663_?	i001	chr21:43774330-43774658	0.51102	0.659963	1.08555e-19	3.73645e-18	0.148944
CSTB	clu_663_?	i002	chr21:43774330-43776204	0.00594938	0.0041372	1.08555e-19	3.73645e-18	-0.00181218
CSTB	clu_663_?	i003	chr21:43774759-43776204	0.483031	0.3359	1.08555e-19	3.73645e-18	-0.147131
NUDT1	clu_43766_?	i001	chr7:2242256-2242925	0.0174258	0.00894565	1.68106e-19	5.75068e-18	-0.00848016
NUDT1	clu_43766_?	i002	chr7:2242256-2244563	0.0682156	0.0359573	1.68106e-19	5.75068e-18	-0.0322582
NUDT1	clu_43766_?	i003	chr7:2242256-2249857	0.00372195	0.00355657	1.68106e-19	5.75068e-18	-0.000165384
NUDT1	clu_43766_?	i004	chr7:2242292-2242925	0.00378947	0.00114091	1.68106e-19	5.75068e-18	-0.00264856
NUDT1	clu_43766_?	i005	chr7:2242975-2244563	0.024545	0.0128374	1.68106e-19	5.75068e-18	-0.0117076
NUDT1	clu_43766_?	i006	chr7:2243048-2244563	0.00150769	0.00102818	1.68106e-19	5.75068e-18	-0.000479509
NUDT1	clu_43766_?	i007	chr7:2244726-2249857	0.0564896	0.046958	1.68106e-19	5.75068e-18	-0.00953156
NUDT1	clu_43766_?	i008	chr7:2244726-2250829	0.00135549	0.00140892	1.68106e-19	5.75068e-18	5.34323e-05
NUDT1	clu_43766_?	i009	chr7:2250002-2250829	0.81942	0.884398	1.68106e-19	5.75068e-18	0.0649783
NUDT1	clu_43766_?	i010	chr7:2250002-2250852	0.00352947	0.00376881	1.68106e-19	5.75068e-18	0.000239335
RFC4	clu_61131_?	i001	chr3:186790060-186790142	0.00606806	0.0071593	1.6935e-19	5.75789e-18	0.00109124
RFC4	clu_61131_?	i002	chr3:186790064-186790142	0.727261	0.684367	1.6935e-19	5.75789e-18	-0.0428944
RFC4	clu_61131_?	i003	chr3:186790064-186790326	0.00135896	0.00162554	1.6935e-19	5.75789e-18	0.000266578
RFC4	clu_61131_?	i004	chr3:186790245-186790326	0.00206395	0.00246531	1.6935e-19	5.75789e-18	0.000401354
RFC4	clu_61131_?	i005	chr3:186790255-186790326	0.216226	0.24721	1.6935e-19	5.75789e-18	0.0309834
RFC4	clu_61131_?	i006	chr3:186790255-186791725	0.00147374	0.00171726	1.6935e-19	5.75789e-18	0.000243528
RFC4	clu_61131_?	i007	chr3:186790406-186791725	0.0455477	0.055456	1.6935e-19	5.75789e-18	0.00990831
AKR1A1	clu_38991_?	i001	chr1:45568999-45569143	0.343577	0.378509	2.1443e-19	7.24642e-18	0.0349316
AKR1A1	clu_38991_?	i002	chr1:45568999-45569891	0.00125346	0.00164725	2.1443e-19	7.24642e-18	0.000393793
AKR1A1	clu_38991_?	i003	chr1:45569229-45569891	0.65517	0.619844	2.1443e-19	7.24642e-18	-0.0353253
CEP57	clu_54311_?	i001	chr11:95813589-95817787	0.315527	0.365401	3.59163e-19	1.20644e-17	0.0498739
CEP57	clu_54311_?	i002	chr11:95813589-95818827	0.00264547	0.00308988	3.59163e-19	1.20644e-17	0.000444407
CEP57	clu_54311_?	i003	chr11:95817903-95818827	0.681827	0.631509	3.59163e-19	1.20644e-17	-0.0503184
CHCHD7	clu_16768_?	i001	chr8:56211837-56212762	0.112211	0.0770062	4.20293e-19	1.40333e-17	-0.0352045
CHCHD7	clu_16768_?	i002	chr8:56211837-56214598	0.762107	0.748516	4.20293e-19	1.40333e-17	-0.0135904
CHCHD7	clu_16768_?	i003	chr8:56212889-56214598	0.0434989	0.0669378	4.20293e-19	1.40333e-17	0.0234389
CHCHD7	clu_16768_?	i004	chr8:56212909-56214598	0.0821835	0.10754	4.20293e-19	1.40333e-17	0.025356
RBM39	clu_47694_?	i001	chr20:35740887-35741941	0.913503	0.895445	4.2894e-19	1.42367e-17	-0.0180583
RBM39	clu_47694_?	i002	chr20:35740989-35741941	0.0864968	0.104555	4.2894e-19	1.42367e-17	0.0180583
RWDD4	clu_36660_?	i001	chr4:183651131-183651218	0.793438	0.755983	5.00805e-19	1.65236e-17	-0.0374552
RWDD4	clu_36660_?	i002	chr4:183651131-183655881	0.022183	0.0207848	5.00805e-19	1.65236e-17	-0.00139824
RWDD4	clu_36660_?	i003	chr4:183651131-183658929	0.0238106	0.0188725	5.00805e-19	1.65236e-17	-0.00493805
RWDD4	clu_36660_?	i004	chr4:183651323-183655881	0.00934478	0.0106052	5.00805e-19	1.65236e-17	0.00126038
RWDD4	clu_36660_?	i005	chr4:183651327-183655881	0.112139	0.146572	5.00805e-19	1.65236e-17	0.0344329
RWDD4	clu_36660_?	i006	chr4:183651327-183658929	0.00533356	0.00541622	5.00805e-19	1.65236e-17	8.26626e-05
RWDD4	clu_36660_?	i007	chr4:183655961-183658929	0.0337508	0.0417664	5.00805e-19	1.65236e-17	0.00801562
CMC1	clu_58638_?	i001	chr3:28241812-28252989	0.00361201	0.0031315	9.18401e-19	3.01236e-17	-0.000480507
CMC1	clu_58638_?	i002	chr3:28241812-28253731	0.00770217	0.00577257	9.18401e-19	3.01236e-17	-0.0019296
CMC1	clu_58638_?	i003	chr3:28241812-28263291	0.118837	0.0937665	9.18401e-19	3.01236e-17	-0.0250704
CMC1	clu_58638_?	i004	chr3:28241812-28316333	0.0268465	0.0229225	9.18401e-19	3.01236e-17	-0.00392394
CMC1	clu_58638_?	i005	chr3:28241901-28263291	0.000845478	0.00117631	9.18401e-19	3.01236e-17	0.000330829
CMC1	clu_58638_?	i006	chr3:28253085-28253731	0.00469247	0.00362421	9.18401e-19	3.01236e-17	-0.00106826
CMC1	clu_58638_?	i007	chr3:28253765-28263291	0.0151801	0.0114335	9.18401e-19	3.01236e-17	-0.00374663
CMC1	clu_58638_?	i008	chr3:28263380-28294434	0.00622972	0.00544466	9.18401e-19	3.01236e-17	-0.000785057
CMC1	clu_58638_?	i009	chr3:28263380-28316333	0.182276	0.175017	9.18401e-19	3.01236e-17	-0.00725857
CMC1	clu_58638_?	i010	chr3:28263380-28319509	0.00199947	0.00170078	9.18401e-19	3.01236e-17	-0.000298697
CMC1	clu_58638_?	i011	chr3:28294526-28316333	0.000753912	0.00135648	9.18401e-19	3.01236e-17	0.000602564
CMC1	clu_58638_?	i012	chr3:28294529-28316333	0.00753267	0.00796666	9.18401e-19	3.01236e-17	0.000433989
CMC1	clu_58638_?	i013	chr3:28316423-28319509	0.619643	0.660468	9.18401e-19	3.01236e-17	0.0408253
CMC1	clu_58638_?	i014	chr3:28316859-28319509	0.00385014	0.00621915	9.18401e-19	3.01236e-17	0.00236901
ATP5MD	clu_8493_?	i001	chr10:103392466-103394199	0.0174105	0.0293899	1.01776e-18	3.31874e-17	0.0119794
ATP5MD	clu_8493_?	i002	chr10:103392466-103395746	0.0339483	0.0646276	1.01776e-18	3.31874e-17	0.0306793
ATP5MD	clu_8493_?	i003	chr10:103392466-103396409	0.948641	0.905982	1.01776e-18	3.31874e-17	-0.0426587
NME2	clu_33259_?	i001	chr17:51168343-51169937	0.0901859	0.100866	1.02891e-18	3.33559e-17	0.0106802
NME2	clu_33259_?	i002	chr17:51168343-51171487	0.0250769	0.0249156	1.02891e-18	3.33559e-17	-0.000161265
NME2	clu_33259_?	i003	chr17:51170049-51171487	0.884737	0.874218	1.02891e-18	3.33559e-17	-0.0105189
CNOT10	clu_58666_?	i001	chr3:32685482-32685774	0.013651	0.0268976	1.31541e-18	4.23973e-17	0.0132465
CNOT10	clu_58666_?	i002	chr3:32685482-32693403	0.000721861	0.00141467	1.31541e-18	4.23973e-17	0.000692813
CNOT10	clu_58666_?	i003	chr3:32685482-32703868	0.333896	0.256031	1.31541e-18	4.23973e-17	-0.0778649
CNOT10	clu_58666_?	i004	chr3:32685482-32708670	0.00375681	0.00358421	1.31541e-18	4.23973e-17	-0.000172602
CNOT10	clu_58666_?	i005	chr3:32693501-32703868	0.0027176	0.00524919	1.31541e-18	4.23973e-17	0.00253159
CNOT10	clu_58666_?	i006	chr3:32703897-32704811	0.00138545	0.00272349	1.31541e-18	4.23973e-17	0.00133804
CNOT10	clu_58666_?	i007	chr3:32703962-32704811	0.195041	0.156548	1.31541e-18	4.23973e-17	-0.0384932
CNOT10	clu_58666_?	i008	chr3:32703962-32708670	0.00103877	0.00193154	1.31541e-18	4.23973e-17	0.000892772
CNOT10	clu_58666_?	i009	chr3:32704972-32708670	0.447792	0.545621	1.31541e-18	4.23973e-17	0.0978289
RAP1B	clu_29130_?	i001	chr12:68652051-68654112	0.325303	0.376476	1.33323e-18	4.27247e-17	0.0511727
RAP1B	clu_29130_?	i002	chr12:68652051-68656306	0.00191441	0.00148302	1.33323e-18	4.27247e-17	-0.000431386
RAP1B	clu_29130_?	i003	chr12:68654252-68656306	0.672782	0.622041	1.33323e-18	4.27247e-17	-0.0507413
OCIAD2	clu_35364_?	i001	chr4:48885565-48892772	0.627763	0.589107	1.37626e-18	4.38516e-17	-0.0386557
OCIAD2	clu_35364_?	i002	chr4:48885565-48894006	0.0968747	0.0911921	1.37626e-18	4.38516e-17	-0.00568263
OCIAD2	clu_35364_?	i003	chr4:48885565-48904484	0.00125441	0.00129955	1.37626e-18	4.38516e-17	4.5142e-05
OCIAD2	clu_35364_?	i004	chr4:48892889-48894006	0.115411	0.143665	1.37626e-18	4.38516e-17	0.0282538
OCIAD2	clu_35364_?	i005	chr4:48894053-48897804	0.100649	0.112702	1.37626e-18	4.38516e-17	0.0120537
OCIAD2	clu_35364_?	i006	chr4:48894053-48904484	0.0059692	0.0058906	1.37626e-18	4.38516e-17	-7.85974e-05
OCIAD2	clu_35364_?	i007	chr4:48897857-48899829	0.0363518	0.0394283	1.37626e-18	4.38516e-17	0.00307649
OCIAD2	clu_35364_?	i008	chr4:48897857-48904484	0.00699329	0.00780965	1.37626e-18	4.38516e-17	0.000816363
OCIAD2	clu_35364_?	i009	chr4:48899925-48904484	0.00873408	0.00890552	1.37626e-18	4.38516e-17	0.000171448
MDFIC,LINC01393	clu_46228_?	i001	chr7:114916662-114920699	0.0238214	0.0131103	2.05268e-18	6.50325e-17	-0.0107111
MDFIC,LINC01393	clu_46228_?	i002	chr7:114916662-114922927	0.0034911	0.00194349	2.05268e-18	6.50325e-17	-0.00154761
MDFIC,LINC01393	clu_46228_?	i003	chr7:114916662-114942275	0.00578674	0.0052638	2.05268e-18	6.50325e-17	-0.000522938
MDFIC,LINC01393	clu_46228_?	i004	chr7:114922636-114922927	0.129896	0.120603	2.05268e-18	6.50325e-17	-0.00929273
MDFIC,LINC01393	clu_46228_?	i005	chr7:114922636-114922930	0.0174046	0.0153885	2.05268e-18	6.50325e-17	-0.00201603
MDFIC,LINC01393	clu_46228_?	i006	chr7:114923127-114923459	0.200664	0.198322	2.05268e-18	6.50325e-17	-0.00234153
MDFIC,LINC01393	clu_46228_?	i007	chr7:114923127-114942275	0.157695	0.169163	2.05268e-18	6.50325e-17	0.0114678
MDFIC,LINC01393	clu_46228_?	i008	chr7:114923127-114979506	0.00372094	0.00207431	2.05268e-18	6.50325e-17	-0.00164663
MDFIC,LINC01393	clu_46228_?	i009	chr7:114942397-114943889	0.00194067	0.00219	2.05268e-18	6.50325e-17	0.000249328
MDFIC,LINC01393	clu_46228_?	i010	chr7:114942397-114946149	0.00312253	0.00324446	2.05268e-18	6.50325e-17	0.000121936
MDFIC,LINC01393	clu_46228_?	i011	chr7:114942397-114979506	0.400393	0.404189	2.05268e-18	6.50325e-17	0.00379585
MDFIC,LINC01393	clu_46228_?	i012	chr7:114942397-115015688	0.000612264	0.00124053	2.05268e-18	6.50325e-17	0.00062827
MDFIC,LINC01393	clu_46228_?	i013	chr7:114942397-115031787	0.0023	0.00189763	2.05268e-18	6.50325e-17	-0.000402364
MDFIC,LINC01393	clu_46228_?	i014	chr7:114946213-114979506	0.00397359	0.00337714	2.05268e-18	6.50325e-17	-0.000596455
MDFIC,LINC01393	clu_46228_?	i015	chr7:114977672-114979506	0.0034666	0.00262775	2.05268e-18	6.50325e-17	-0.000838851
MDFIC,LINC01393	clu_46228_?	i016	chr7:114979781-115013979	0.00576582	0.00319866	2.05268e-18	6.50325e-17	-0.00256715
MDFIC,LINC01393	clu_46228_?	i017	chr7:114979781-115015688	0.0279527	0.0413244	2.05268e-18	6.50325e-17	0.0133717
MDFIC,LINC01393	clu_46228_?	i018	chr7:114979781-115031787	0.00250847	0.0034412	2.05268e-18	6.50325e-17	0.000932731
MDFIC,LINC01393	clu_46228_?	i019	chr7:115014533-115015688	0.0054847	0.00740042	2.05268e-18	6.50325e-17	0.00191572
COX20	clu_42740_?	i001	chr1:244835736-244841944	0.00718691	0.00666767	2.22363e-18	7.00507e-17	-0.000519239
COX20	clu_42740_?	i002	chr1:244835736-244842195	0.00851825	0.00655799	2.22363e-18	7.00507e-17	-0.00196026
COX20	clu_42740_?	i003	chr1:244835756-244841944	0.433486	0.431657	2.22363e-18	7.00507e-17	-0.00182898
COX20	clu_42740_?	i004	chr1:244835756-244842195	0.272048	0.22547	2.22363e-18	7.00507e-17	-0.0465775
COX20	clu_42740_?	i005	chr1:244836520-244841944	0.00330837	0.00391348	2.22363e-18	7.00507e-17	0.000605108
COX20	clu_42740_?	i006	chr1:244842058-244842195	0.270378	0.319735	2.22363e-18	7.00507e-17	0.0493567
COX20	clu_42740_?	i007	chr1:244842058-244842199	0.00507434	0.00599851	2.22363e-18	7.00507e-17	0.000924171
MKI67	clu_8842_?	i001	chr10:128113602-128114928	0.14768	0.128828	2.273e-18	7.12038e-17	-0.0188524
MKI67	clu_8842_?	i002	chr10:128113602-128116491	0.344277	0.257594	2.273e-18	7.12038e-17	-0.0866833
MKI67	clu_8842_?	i003	chr10:128116007-128116491	0.508042	0.613578	2.273e-18	7.12038e-17	0.105536
KRR1	clu_29240_?	i001	chr12:75505254-75506316	0.668875	0.630288	2.96878e-18	9.248e-17	-0.0385868
KRR1	clu_29240_?	i002	chr12:75505254-75506484	0.00407895	0.00313707	2.96878e-18	9.248e-17	-0.000941883
KRR1	clu_29240_?	i003	chr12:75506360-75506484	0.0052421	0.005318	2.96878e-18	9.248e-17	7.59014e-05
KRR1	clu_29240_?	i004	chr12:75506399-75506484	0.321804	0.361257	2.96878e-18	9.248e-17	0.0394528
YAF2	clu_28178_?	i001	chr12:42161765-42172140	0.00218356	0.00205675	4.32166e-18	1.33875e-16	-0.000126806
YAF2	clu_28178_?	i002	chr12:42161765-42199136	0.00963649	0.0121372	4.32166e-18	1.33875e-16	0.00250068
YAF2	clu_28178_?	i003	chr12:42161765-42210355	0.0301853	0.0337325	4.32166e-18	1.33875e-16	0.00354725
YAF2	clu_28178_?	i004	chr12:42161765-42210548	0.0174435	0.014787	4.32166e-18	1.33875e-16	-0.00265658
YAF2	clu_28178_?	i005	chr12:42161765-42235614	0.00557738	0.0061899	4.32166e-18	1.33875e-16	0.000612516
YAF2	clu_28178_?	i006	chr12:42161765-42237599	0.227726	0.201989	4.32166e-18	1.33875e-16	-0.0257369
YAF2	clu_28178_?	i007	chr12:42161765-42238155	0.0031904	0.00347193	4.32166e-18	1.33875e-16	0.000281527
YAF2	clu_28178_?	i008	chr12:42172209-42210355	0.00142619	0.00193243	4.32166e-18	1.33875e-16	0.000506239
YAF2	clu_28178_?	i009	chr12:42199235-42210355	0.00772676	0.00946739	4.32166e-18	1.33875e-16	0.00174062
YAF2	clu_28178_?	i010	chr12:42199235-42237599	0.00290536	0.00673465	4.32166e-18	1.33875e-16	0.00382929
YAF2	clu_28178_?	i011	chr12:42210454-42210548	0.0475414	0.0637514	4.32166e-18	1.33875e-16	0.0162101
YAF2	clu_28178_?	i012	chr12:42210619-42235614	0.000759584	0.00120354	4.32166e-18	1.33875e-16	0.000443952
YAF2	clu_28178_?	i013	chr12:42210619-42237599	0.0311992	0.0352494	4.32166e-18	1.33875e-16	0.00405021
YAF2	clu_28178_?	i014	chr12:42210680-42212444	0.00125455	0.00177344	4.32166e-18	1.33875e-16	0.000518895
YAF2	clu_28178_?	i015	chr12:42210680-42237599	0.0021493	0.00492235	4.32166e-18	1.33875e-16	0.00277304
YAF2	clu_28178_?	i016	chr12:42235755-42237599	0.00172095	0.00289716	4.32166e-18	1.33875e-16	0.00117621
YAF2	clu_28178_?	i017	chr12:42235997-42237599	0.00205555	0.00174426	4.32166e-18	1.33875e-16	-0.000311283
YAF2	clu_28178_?	i018	chr12:42237724-42238155	0.605319	0.59596	4.32166e-18	1.33875e-16	-0.00935896
VAMP8	clu_12505_?	i001	chr2:85577649-85579009	0.393476	0.264703	4.40679e-18	1.3556e-16	-0.128774
VAMP8	clu_12505_?	i002	chr2:85577649-85581576	0.00841631	0.00831726	4.40679e-18	1.3556e-16	-9.90521e-05
VAMP8	clu_12505_?	i003	chr2:85577649-85581754	0.00195167	0.00132236	4.40679e-18	1.3556e-16	-0.000629312
VAMP8	clu_12505_?	i004	chr2:85577649-85581811	0.00165602	0.00372387	4.40679e-18	1.3556e-16	0.00206785
VAMP8	clu_12505_?	i005	chr2:85579167-85581576	0.417019	0.519866	4.40679e-18	1.3556e-16	0.102847
VAMP8	clu_12505_?	i006	chr2:85579167-85581754	0.0049105	0.00678378	4.40679e-18	1.3556e-16	0.00187328
VAMP8	clu_12505_?	i007	chr2:85579167-85581811	0.101947	0.115086	4.40679e-18	1.3556e-16	0.0131386
VAMP8	clu_12505_?	i008	chr2:85581656-85581754	0.00527791	0.00800488	4.40679e-18	1.3556e-16	0.00272697
VAMP8	clu_12505_?	i009	chr2:85581656-85581811	0.0162511	0.0230519	4.40679e-18	1.3556e-16	0.00680081
VAMP8	clu_12505_?	i010	chr2:85581702-85581811	0.0342868	0.0308219	4.40679e-18	1.3556e-16	-0.00346488
VAMP8	clu_12505_?	i011	chr2:85581716-85581811	0.014807	0.0183192	4.40679e-18	1.3556e-16	0.00351222
ORC6	clu_50573_?	i001	chr16:46693182-46695562	0.440239	0.490011	4.42466e-18	1.3556e-16	0.0497715
ORC6	clu_50573_?	i002	chr16:46693182-46696017	0.00211845	0.00193013	4.42466e-18	1.3556e-16	-0.000188317
ORC6	clu_50573_?	i003	chr16:46695674-46696017	0.553331	0.504132	4.42466e-18	1.3556e-16	-0.0491999
ORC6	clu_50573_?	i004	chr16:46695674-46696020	0.00431105	0.00392773	4.42466e-18	1.3556e-16	-0.00038332
HP1BP3	clu_37624_?	i001	chr1:20779908-20780345	0.0233482	0.0231663	5.26514e-18	1.60428e-16	-0.00018189
HP1BP3	clu_37624_?	i002	chr1:20779908-20780350	0.00813404	0.00597879	5.26514e-18	1.60428e-16	-0.00215525
HP1BP3	clu_37624_?	i003	chr1:20779911-20780345	0.735097	0.773927	5.26514e-18	1.60428e-16	0.0388299
HP1BP3	clu_37624_?	i004	chr1:20779911-20780350	0.0612451	0.0613683	5.26514e-18	1.60428e-16	0.000123202
HP1BP3	clu_37624_?	i005	chr1:20779911-20780354	0.00394647	0.00453385	5.26514e-18	1.60428e-16	0.000587384
HP1BP3	clu_37624_?	i006	chr1:20779911-20786649	0.020269	0.0144341	5.26514e-18	1.60428e-16	-0.00583493
HP1BP3	clu_37624_?	i007	chr1:20779911-20787195	0.0682052	0.0509653	5.26514e-18	1.60428e-16	-0.0172399
HP1BP3	clu_37624_?	i008	chr1:20780540-20786514	0.00760812	0.00556067	5.26514e-18	1.60428e-16	-0.00204745
HP1BP3	clu_37624_?	i009	chr1:20780540-20786649	0.0445548	0.0403616	5.26514e-18	1.60428e-16	-0.00419323
HP1BP3	clu_37624_?	i010	chr1:20780540-20787195	0.0275917	0.0197039	5.26514e-18	1.60428e-16	-0.00788783
TMEM50A	clu_37832_?	i001	chr1:25351693-25352882	0.498849	0.39727	8.20273e-18	2.48578e-16	-0.101579
TMEM50A	clu_37832_?	i002	chr1:25351693-25356793	0.0116835	0.0133463	8.20273e-18	2.48578e-16	0.00166278
TMEM50A	clu_37832_?	i003	chr1:25352974-25356793	0.489467	0.589384	8.20273e-18	2.48578e-16	0.0999163
SP110	clu_14711_?	i001	chr2:230172959-230177538	0.0032918	0.00390342	1.12426e-17	3.38859e-16	0.000611614
SP110	clu_14711_?	i002	chr2:230176724-230177538	0.445697	0.518073	1.12426e-17	3.38859e-16	0.0723763
SP110	clu_14711_?	i003	chr2:230176724-230183572	0.00628512	0.00544192	1.12426e-17	3.38859e-16	-0.000843198
SP110	clu_14711_?	i004	chr2:230178255-230183572	0.538972	0.467599	1.12426e-17	3.38859e-16	-0.0713731
SP110	clu_14711_?	i005	chr2:230183464-230183572	0.00575409	0.00498255	1.12426e-17	3.38859e-16	-0.000771546
RPL30	clu_17245_?	i001	chr8:98042718-98044943	0.068002	0.0535821	1.13047e-17	3.38899e-16	-0.0144199
RPL30	clu_17245_?	i002	chr8:98042775-98044943	0.931998	0.946418	1.13047e-17	3.38899e-16	0.0144199
SRP19	clu_19293_?	i001	chr5:112864528-112864621	0.490882	0.53658	1.17514e-17	3.50404e-16	0.0456973
SRP19	clu_19293_?	i002	chr5:112864528-112867404	0.00368148	0.00325821	1.17514e-17	3.50404e-16	-0.000423269
SRP19	clu_19293_?	i003	chr5:112864528-112891603	0.00507497	0.00551023	1.17514e-17	3.50404e-16	0.00043526
SRP19	clu_19293_?	i004	chr5:112864732-112867372	0.083054	0.0842964	1.17514e-17	3.50404e-16	0.00124231
SRP19	clu_19293_?	i005	chr5:112864732-112867404	0.412266	0.364277	1.17514e-17	3.50404e-16	-0.0479893
SRP19	clu_19293_?	i006	chr5:112864732-112891603	0.00349884	0.00401959	1.17514e-17	3.50404e-16	0.000520754
SRP19	clu_19293_?	i007	chr5:112876550-112891603	0.00154218	0.00205914	1.17514e-17	3.50404e-16	0.000516966
PLAC8	clu_35742_?	i001	chr4:83094791-83104896	0.670346	0.736236	1.22971e-17	3.64727e-16	0.0658901
PLAC8	clu_35742_?	i002	chr4:83094791-83114666	0.0506848	0.0389138	1.22971e-17	3.64727e-16	-0.011771
PLAC8	clu_35742_?	i003	chr4:83105020-83107804	0.163117	0.150825	1.22971e-17	3.64727e-16	-0.0122928
PLAC8	clu_35742_?	i004	chr4:83105020-83114666	0.0298011	0.0242191	1.22971e-17	3.64727e-16	-0.00558197
PLAC8	clu_35742_?	i005	chr4:83107950-83114666	0.0860509	0.0498065	1.22971e-17	3.64727e-16	-0.0362443
PLSCR1	clu_60576_?	i001	chr3:146517167-146521544	0.0499144	0.0611783	1.3065e-17	3.85452e-16	0.0112639
PLSCR1	clu_60576_?	i002	chr3:146517167-146525605	0.00193201	0.00335641	1.3065e-17	3.85452e-16	0.0014244
PLSCR1	clu_60576_?	i003	chr3:146521705-146521833	0.661891	0.573093	1.3065e-17	3.85452e-16	-0.0887978
PLSCR1	clu_60576_?	i004	chr3:146521705-146525605	0.000778306	0.00115766	1.3065e-17	3.85452e-16	0.00037935
PLSCR1	clu_60576_?	i005	chr3:146521981-146525605	0.00375342	0.00562303	1.3065e-17	3.85452e-16	0.00186961
PLSCR1	clu_60576_?	i006	chr3:146522053-146525605	0.281731	0.355591	1.3065e-17	3.85452e-16	0.0738605
HNRNPR	clu_37718_?	i001	chr1:23321663-23323556	0.692434	0.658182	1.91849e-17	5.63026e-16	-0.0342523
HNRNPR	clu_37718_?	i002	chr1:23321663-23333518	0.0254342	0.0250832	1.91849e-17	5.63026e-16	-0.000350987
HNRNPR	clu_37718_?	i003	chr1:23323732-23333518	0.19137	0.223333	1.91849e-17	5.63026e-16	0.0319629
HNRNPR	clu_37718_?	i004	chr1:23323732-23337754	0.0132398	0.0160514	1.91849e-17	5.63026e-16	0.00281158
HNRNPR	clu_37718_?	i005	chr1:23333631-23337754	0.0775218	0.0773506	1.91849e-17	5.63026e-16	-0.000171146
MYCBP2	clu_15807_?	i001	chr13:77270063-77270296	0.377897	0.293331	2.33135e-17	6.80609e-16	-0.0845659
MYCBP2	clu_15807_?	i002	chr13:77270063-77273472	0.00123161	0.0014153	2.33135e-17	6.80609e-16	0.000183694
MYCBP2	clu_15807_?	i003	chr13:77270538-77272323	0.0065067	0.0073756	2.33135e-17	6.80609e-16	0.000868903
MYCBP2	clu_15807_?	i004	chr13:77270538-77273472	0.611769	0.694916	2.33135e-17	6.80609e-16	0.0831466
MYCBP2	clu_15807_?	i005	chr13:77272399-77273472	0.00259601	0.00296272	2.33135e-17	6.80609e-16	0.000366712
PAICS	clu_35441_?	i001	chr4:56450702-56451872	0.0966226	0.0658828	2.75365e-17	7.9146e-16	-0.0307398
PAICS	clu_35441_?	i002	chr4:56450702-56459372	0.00393788	0.00402463	2.75365e-17	7.9146e-16	8.67483e-05
PAICS	clu_35441_?	i003	chr4:56452052-56453603	0.0741912	0.0767316	2.75365e-17	7.9146e-16	0.00254038
PAICS	clu_35441_?	i004	chr4:56452052-56459372	0.0426265	0.0440361	2.75365e-17	7.9146e-16	0.0014096
PAICS	clu_35441_?	i005	chr4:56452081-56459372	0.00156569	0.00161954	2.75365e-17	7.9146e-16	5.38521e-05
PAICS	clu_35441_?	i006	chr4:56453761-56459372	0.774968	0.801436	2.75365e-17	7.9146e-16	0.0264685
PAICS	clu_35441_?	i007	chr4:56455092-56459372	0.00128208	0.00132574	2.75365e-17	7.9146e-16	4.36645e-05
PAICS	clu_35441_?	i008	chr4:56456234-56459372	0.00480635	0.00494339	2.75365e-17	7.9146e-16	0.000137045
NASP	clu_38998_?	i001	chr1:45616703-45617463	0.159776	0.18596	2.74242e-17	7.9146e-16	0.0261847
NASP	clu_38998_?	i002	chr1:45616703-45618061	0.0152292	0.0140884	2.74242e-17	7.9146e-16	-0.00114073
NASP	clu_38998_?	i003	chr1:45617591-45618061	0.824995	0.799951	2.74242e-17	7.9146e-16	-0.025044
CIAO2B	clu_50895_?	i001	chr16:66932300-66932780	0.681353	0.658466	2.73459e-17	7.9146e-16	-0.0228867
CIAO2B	clu_50895_?	i002	chr16:66932300-66933614	0.00110527	0.00109547	2.73459e-17	7.9146e-16	-9.80732e-06
CIAO2B	clu_50895_?	i003	chr16:66932825-66933614	0.317542	0.340438	2.73459e-17	7.9146e-16	0.0228965
KIF2C	clu_38918_?	i001	chr1:44747700-44750442	0.28322	0.336408	2.95866e-17	8.46024e-16	0.0531889
KIF2C	clu_38918_?	i002	chr1:44747700-44753132	0.00168435	0.00148906	2.95866e-17	8.46024e-16	-0.000195291
KIF2C	clu_38918_?	i003	chr1:44750564-44753132	0.552522	0.518651	2.95866e-17	8.46024e-16	-0.033871
KIF2C	clu_38918_?	i004	chr1:44750564-44753733	0.0155281	0.0169613	2.95866e-17	8.46024e-16	0.00143316
KIF2C	clu_38918_?	i005	chr1:44753254-44753733	0.147046	0.12649	2.95866e-17	8.46024e-16	-0.0205558
ALG11,UTP14C	clu_15684_?	i001	chr13:52012462-52015783	0.0107274	0.0142763	4.54123e-17	1.29193e-15	0.0035489
ALG11,UTP14C	clu_15684_?	i002	chr13:52012462-52018913	0.838205	0.734037	4.54123e-17	1.29193e-15	-0.104168
ALG11,UTP14C	clu_15684_?	i003	chr13:52012462-52028319	0.0426213	0.066289	4.54123e-17	1.29193e-15	0.0236677
ALG11,UTP14C	clu_15684_?	i004	chr13:52012574-52018913	0.0127599	0.0125834	4.54123e-17	1.29193e-15	-0.000176509
ALG11,UTP14C	clu_15684_?	i005	chr13:52017685-52018913	0.0125683	0.00846339	4.54123e-17	1.29193e-15	-0.00410495
ALG11,UTP14C	clu_15684_?	i006	chr13:52019143-52024006	0.00527827	0.00587733	4.54123e-17	1.29193e-15	0.000599062
ALG11,UTP14C	clu_15684_?	i007	chr13:52019143-52024586	0.00270795	0.00551638	4.54123e-17	1.29193e-15	0.00280842
ALG11,UTP14C	clu_15684_?	i008	chr13:52019143-52028319	0.0158938	0.0322265	4.54123e-17	1.29193e-15	0.0163327
ALG11,UTP14C	clu_15684_?	i009	chr13:52024937-52028319	0.0592379	0.120731	4.54123e-17	1.29193e-15	0.0614928
SMCHD1	clu_42880_?	i001	chr18:2667031-2673281	0.0635052	0.0592192	4.66191e-17	1.31953e-15	-0.00428603
SMCHD1	clu_42880_?	i002	chr18:2667031-2688394	0.00387278	0.00373149	4.66191e-17	1.31953e-15	-0.000141288
SMCHD1	clu_42880_?	i003	chr18:2673363-2674015	0.136951	0.166137	4.66191e-17	1.31953e-15	0.0291856
SMCHD1	clu_42880_?	i004	chr18:2673363-2688394	0.00459088	0.00376854	4.66191e-17	1.31953e-15	-0.000822345
SMCHD1	clu_42880_?	i005	chr18:2674127-2688394	0.00480369	0.00559886	4.66191e-17	1.31953e-15	0.000795164
SMCHD1	clu_42880_?	i006	chr18:2674132-2688394	0.0023313	0.00187331	4.66191e-17	1.31953e-15	-0.000457985
SMCHD1	clu_42880_?	i007	chr18:2674145-2688394	0.783945	0.759672	4.66191e-17	1.31953e-15	-0.0242732
RPS5	clu_25116_?	i001	chr19:58388245-58392976	0.00509317	0.00349457	6.18765e-17	1.74254e-15	-0.0015986
RPS5	clu_25116_?	i002	chr19:58388245-58394497	0.0079525	0.00730138	6.18765e-17	1.74254e-15	-0.000651114
RPS5	clu_25116_?	i003	chr19:58393487-58394497	0.986954	0.989204	6.18765e-17	1.74254e-15	0.00224971
PSMA1	clu_52249_?	i001	chr11:14519041-14519873	0.0104928	0.0167504	7.19379e-17	2.01571e-15	0.00625761
PSMA1	clu_52249_?	i002	chr11:14519041-14519905	0.0228996	0.0421472	7.19379e-17	2.01571e-15	0.0192475
PSMA1	clu_52249_?	i003	chr11:14519041-14520193	0.00515892	0.00747602	7.19379e-17	2.01571e-15	0.0023171
PSMA1	clu_52249_?	i004	chr11:14519041-14520297	0.961449	0.933626	7.19379e-17	2.01571e-15	-0.0278222
DARS	clu_13360_?	i001	chr2:135961498-135979274	0.656496	0.623054	7.69135e-17	2.14435e-15	-0.0334416
DARS	clu_13360_?	i002	chr2:135961498-135983397	0.00179775	0.00102853	7.69135e-17	2.14435e-15	-0.00076922
DARS	clu_13360_?	i003	chr2:135979366-135983397	0.341707	0.375917	7.69135e-17	2.14435e-15	0.0342108
PAM16	clu_49055_?	i001	chr16:4341504-4343207	0.555597	0.664642	8.0558e-17	2.23478e-15	0.109045
PAM16	clu_49055_?	i002	chr16:4341504-4351232	0.0435726	0.032881	8.0558e-17	2.23478e-15	-0.0106916
PAM16	clu_49055_?	i003	chr16:4343291-4351232	0.400831	0.302477	8.0558e-17	2.23478e-15	-0.0983537
C11orf58	clu_52259_?	i001	chr11:16744684-16748097	0.163009	0.153379	8.15091e-17	2.24998e-15	-0.00963047
C11orf58	clu_52259_?	i002	chr11:16744684-16752785	0.00138053	0.00174272	8.15091e-17	2.24998e-15	0.000362184
C11orf58	clu_52259_?	i003	chr11:16748157-16752785	0.224044	0.249933	8.15091e-17	2.24998e-15	0.0258893
C11orf58	clu_52259_?	i004	chr11:16748157-16754871	0.00366459	0.00354512	8.15091e-17	2.24998e-15	-0.000119471
C11orf58	clu_52259_?	i005	chr11:16752894-16754871	0.607902	0.5914	8.15091e-17	2.24998e-15	-0.0165015
BUD31	clu_45678_?	i001	chr7:99409004-99410034	0.601252	0.526646	1.01665e-16	2.79253e-15	-0.0746058
BUD31	clu_45678_?	i002	chr7:99409004-99410037	0.0315607	0.0279666	1.01665e-16	2.79253e-15	-0.00359416
BUD31	clu_45678_?	i003	chr7:99409004-99411064	0.00536063	0.0054811	1.01665e-16	2.79253e-15	0.00012047
BUD31	clu_45678_?	i004	chr7:99409199-99410034	0.00124437	0.00161619	1.01665e-16	2.79253e-15	0.000371828
BUD31	clu_45678_?	i005	chr7:99409245-99410034	0.0696366	0.0950669	1.01665e-16	2.79253e-15	0.0254303
BUD31	clu_45678_?	i006	chr7:99409245-99410037	0.00410547	0.0036636	1.01665e-16	2.79253e-15	-0.000441862
BUD31	clu_45678_?	i007	chr7:99410169-99411064	0.28684	0.339559	1.01665e-16	2.79253e-15	0.0527193
PCM1	clu_16248_?	i001	chr8:17947363-17950615	0.33124	0.387276	1.16489e-16	3.18403e-15	0.0560363
PCM1	clu_16248_?	i002	chr8:17947363-17950624	0.00164396	0.00152686	1.16489e-16	3.18403e-15	-0.000117101
PCM1	clu_16248_?	i003	chr8:17947363-17952970	0.00230477	0.00221217	1.16489e-16	3.18403e-15	-9.25968e-05
PCM1	clu_16248_?	i004	chr8:17950724-17952970	0.664812	0.608985	1.16489e-16	3.18403e-15	-0.0558266
PFDN6	clu_56131_?	i001	chr6:33289920-33290174	0.0582139	0.0510077	1.18287e-16	3.21741e-15	-0.00720625
PFDN6	clu_56131_?	i002	chr6:33289920-33290716	0.00146296	0.0014973	1.18287e-16	3.21741e-15	3.43334e-05
PFDN6	clu_56131_?	i003	chr6:33290244-33290326	0.0859552	0.106534	1.18287e-16	3.21741e-15	0.0205788
PFDN6	clu_56131_?	i004	chr6:33290244-33290716	0.0380273	0.0384739	1.18287e-16	3.21741e-15	0.000446579
PFDN6	clu_56131_?	i005	chr6:33290450-33290716	0.816341	0.802487	1.18287e-16	3.21741e-15	-0.0138535
SMAP2	clu_38748_?	i001	chr1:40374223-40375747	0.00137902	0.0013534	1.45793e-16	3.94631e-15	-2.56237e-05
SMAP2	clu_38748_?	i002	chr1:40374223-40403684	0.0019415	0.00231759	1.45793e-16	3.94631e-15	0.000376095
SMAP2	clu_38748_?	i003	chr1:40374223-40406736	0.275115	0.307933	1.45793e-16	3.94631e-15	0.032818
SMAP2	clu_38748_?	i004	chr1:40374223-40406800	0.00149731	0.00151116	1.45793e-16	3.94631e-15	1.38564e-05
SMAP2	clu_38748_?	i005	chr1:40374223-40408653	0.0025172	0.0024575	1.45793e-16	3.94631e-15	-5.97037e-05
SMAP2	clu_38748_?	i006	chr1:40374223-40413016	0.00113957	0.00112274	1.45793e-16	3.94631e-15	-1.68356e-05
SMAP2	clu_38748_?	i007	chr1:40374708-40406736	0.00925771	0.00885279	1.45793e-16	3.94631e-15	-0.000404918
SMAP2	clu_38748_?	i008	chr1:40375816-40406736	0.00159929	0.001591	1.45793e-16	3.94631e-15	-8.29063e-06
SMAP2	clu_38748_?	i009	chr1:40381433-40406736	0.00173891	0.00169213	1.45793e-16	3.94631e-15	-4.67764e-05
SMAP2	clu_38748_?	i010	chr1:40403746-40406736	0.0048064	0.004736	1.45793e-16	3.94631e-15	-7.03993e-05
SMAP2	clu_38748_?	i011	chr1:40406869-40408653	0.5927	0.565084	1.45793e-16	3.94631e-15	-0.0276159
SMAP2	clu_38748_?	i012	chr1:40409835-40413016	0.106308	0.101348	1.45793e-16	3.94631e-15	-0.00495949
MRPL35	clu_12550_?	i001	chr2:86199533-86206106	0.184022	0.181295	1.47523e-16	3.97386e-15	-0.00272673
MRPL35	clu_12550_?	i002	chr2:86199533-86207183	0.00212804	0.00196592	1.47523e-16	3.97386e-15	-0.00016212
MRPL35	clu_12550_?	i003	chr2:86206295-86207183	0.628338	0.579376	1.47523e-16	3.97386e-15	-0.0489617
MRPL35	clu_12550_?	i004	chr2:86206295-86210480	0.00422627	0.00401922	1.47523e-16	3.97386e-15	-0.000207051
MRPL35	clu_12550_?	i005	chr2:86207327-86210480	0.181286	0.233344	1.47523e-16	3.97386e-15	0.0520576
SNRPG	clu_12239_?	i001	chr2:70288192-70289350	0.481549	0.508513	1.65689e-16	4.44173e-15	0.0269638
SNRPG	clu_12239_?	i002	chr2:70288192-70293618	0.033035	0.0313169	1.65689e-16	4.44173e-15	-0.00171809
SNRPG	clu_12239_?	i003	chr2:70289372-70293618	0.485416	0.46017	1.65689e-16	4.44173e-15	-0.0252457
RPL27	clu_32678_?	i001	chr17:42998831-42999933	0.0698439	0.0750349	1.78736e-16	4.74588e-15	0.00519104
RPL27	clu_32678_?	i002	chr17:42998831-43002673	0.005019	0.00354753	1.78736e-16	4.74588e-15	-0.00147147
RPL27	clu_32678_?	i003	chr17:43000102-43002673	0.925137	0.921418	1.78736e-16	4.74588e-15	-0.00371957
GSTP1	clu_53690_?	i001	chr11:67585241-67586104	0.0870672	0.101825	1.78523e-16	4.74588e-15	0.0147579
GSTP1	clu_53690_?	i002	chr11:67585241-67586389	0.00168834	0.00157792	1.78523e-16	4.74588e-15	-0.000110418
GSTP1	clu_53690_?	i003	chr11:67586211-67586389	0.911244	0.896597	1.78523e-16	4.74588e-15	-0.0146475
ORC3	clu_57134_?	i001	chr6:87594407-87594527	0.0840954	0.0986208	2.10455e-16	5.5616e-15	0.0145254
ORC3	clu_57134_?	i002	chr6:87594407-87594542	0.0434018	0.0447926	2.10455e-16	5.5616e-15	0.00139082
ORC3	clu_57134_?	i003	chr6:87594407-87601784	0.634961	0.505748	2.10455e-16	5.5616e-15	-0.129212
ORC3	clu_57134_?	i004	chr6:87594613-87594718	0.00258681	0.00444757	2.10455e-16	5.5616e-15	0.00186076
ORC3	clu_57134_?	i005	chr6:87594613-87595108	0.0066685	0.0189606	2.10455e-16	5.5616e-15	0.0122921
ORC3	clu_57134_?	i006	chr6:87594613-87595172	0.188799	0.2736	2.10455e-16	5.5616e-15	0.0848011
ORC3	clu_57134_?	i007	chr6:87594613-87601784	0.039488	0.0538303	2.10455e-16	5.5616e-15	0.0143423
PUM1	clu_38218_?	i001	chr1:30995220-31005853	0.450428	0.332273	2.2359e-16	5.88084e-15	-0.118156
PUM1	clu_38218_?	i002	chr1:30995220-31028796	0.0374924	0.0366007	2.2359e-16	5.88084e-15	-0.00089172
PUM1	clu_38218_?	i003	chr1:31007099-31028796	0.0317233	0.0432899	2.2359e-16	5.88084e-15	0.0115666
PUM1	clu_38218_?	i004	chr1:31007102-31028796	0.480356	0.587837	2.2359e-16	5.88084e-15	0.107481
NPM1	clu_20358_?	i001	chr5:171400210-171400839	0.706518	0.721794	2.72974e-16	7.14603e-15	0.0152757
NPM1	clu_20358_?	i002	chr5:171400210-171405302	0.00711242	0.0068251	2.72974e-16	7.14603e-15	-0.000287318
NPM1	clu_20358_?	i003	chr5:171400925-171405302	0.28637	0.271381	2.72974e-16	7.14603e-15	-0.0149884
SLC38A1	clu_28234_?	i001	chr12:46229639-46239679	0.453396	0.378418	3.11439e-16	8.11487e-15	-0.074978
SLC38A1	clu_28234_?	i002	chr12:46229639-46243200	0.00174958	0.00129533	3.11439e-16	8.11487e-15	-0.000454255
SLC38A1	clu_28234_?	i003	chr12:46239893-46241736	0.00203492	0.000906875	3.11439e-16	8.11487e-15	-0.00112804
SLC38A1	clu_28234_?	i004	chr12:46239893-46243200	0.440456	0.520852	3.11439e-16	8.11487e-15	0.0803955
SLC38A1	clu_28234_?	i005	chr12:46239893-46268526	0.00376565	0.00429903	3.11439e-16	8.11487e-15	0.000533386
SLC38A1	clu_28234_?	i006	chr12:46239893-46268865	0.00205904	0.00242996	3.11439e-16	8.11487e-15	0.000370926
SLC38A1	clu_28234_?	i007	chr12:46243314-46254814	0.017246	0.016192	3.11439e-16	8.11487e-15	-0.00105393
SLC38A1	clu_28234_?	i008	chr12:46243314-46268455	0.00277959	0.00145136	3.11439e-16	8.11487e-15	-0.00132822
SLC38A1	clu_28234_?	i009	chr12:46243314-46268526	0.0420642	0.0432618	3.11439e-16	8.11487e-15	0.00119762
SLC38A1	clu_28234_?	i010	chr12:46243314-46268865	0.0248351	0.0232376	3.11439e-16	8.11487e-15	-0.00159749
SLC38A1	clu_28234_?	i011	chr12:46254936-46268526	0.00623952	0.00493126	3.11439e-16	8.11487e-15	-0.00130826
SLC38A1	clu_28234_?	i012	chr12:46254936-46268865	0.00337453	0.00272532	3.11439e-16	8.11487e-15	-0.000649212
NAP1L1	clu_29244_?	i001	chr12:76060279-76067371	0.894515	0.916149	3.27354e-16	8.48988e-15	0.0216334
NAP1L1	clu_29244_?	i002	chr12:76060279-76074203	0.0408851	0.032146	3.27354e-16	8.48988e-15	-0.00873904
NAP1L1	clu_29244_?	i003	chr12:76068994-76074203	0.0645997	0.0517054	3.27354e-16	8.48988e-15	-0.0128943
TMEM183A	clu_42016_?	i001	chr1:203007574-203007774	0.356783	0.405322	4.02314e-16	1.03857e-14	0.0485396
TMEM183A	clu_42016_?	i002	chr1:203007574-203008643	0.00112537	0.00148464	4.02314e-16	1.03857e-14	0.000359274
TMEM183A	clu_42016_?	i003	chr1:203007863-203008643	0.642092	0.593193	4.02314e-16	1.03857e-14	-0.0488989
SH3GLB1	clu_39618_?	i001	chr1:86704971-86715724	0.448435	0.381881	4.47928e-16	1.15099e-14	-0.0665536
SH3GLB1	clu_39618_?	i002	chr1:86704971-86719507	0.00599062	0.00589926	4.47928e-16	1.15099e-14	-9.13596e-05
SH3GLB1	clu_39618_?	i003	chr1:86715865-86719507	0.545575	0.612219	4.47928e-16	1.15099e-14	0.0666449
ERLEC1	clu_11842_?	i001	chr2:53794449-53795933	0.404813	0.446052	5.4083e-16	1.38334e-14	0.0412392
ERLEC1	clu_11842_?	i002	chr2:53794449-53797515	0.0018338	0.00179179	5.4083e-16	1.38334e-14	-4.20102e-05
ERLEC1	clu_11842_?	i003	chr2:53796013-53797515	0.593354	0.552156	5.4083e-16	1.38334e-14	-0.0411972
CAMTA1	clu_37141_?	i001	chr1:6785575-6806983	0.00668451	0.00575971	5.60786e-16	1.42783e-14	-0.0009248
CAMTA1	clu_37141_?	i002	chr1:6785575-6820181	0.529844	0.38764	5.60786e-16	1.42783e-14	-0.142204
CAMTA1	clu_37141_?	i003	chr1:6785575-6825092	0.0921752	0.0786013	5.60786e-16	1.42783e-14	-0.0135739
CAMTA1	clu_37141_?	i004	chr1:6820250-6825092	0.366702	0.521464	5.60786e-16	1.42783e-14	0.154763
CAMTA1	clu_37141_?	i005	chr1:6824935-6825092	0.00459473	0.00653481	5.60786e-16	1.42783e-14	0.00194008
EZH2	clu_46762_?	i001	chr7:148829848-148832634	0.563983	0.576157	6.01322e-16	1.52408e-14	0.0121742
EZH2	clu_46762_?	i002	chr7:148829848-148846470	0.095334	0.0933634	6.01322e-16	1.52408e-14	-0.00197063
EZH2	clu_46762_?	i003	chr7:148829848-148846497	0.0221192	0.0253924	6.01322e-16	1.52408e-14	0.00327314
EZH2	clu_46762_?	i004	chr7:148829848-148884164	0.00522739	0.00423373	6.01322e-16	1.52408e-14	-0.000993654
EZH2	clu_46762_?	i005	chr7:148832750-148836822	0.0106494	0.0087492	6.01322e-16	1.52408e-14	-0.00190019
EZH2	clu_46762_?	i006	chr7:148832750-148846470	0.152442	0.168787	6.01322e-16	1.52408e-14	0.0163454
EZH2	clu_46762_?	i007	chr7:148832750-148846497	0.0458792	0.0559102	6.01322e-16	1.52408e-14	0.010031
EZH2	clu_46762_?	i008	chr7:148832750-148884164	0.00742296	0.00509904	6.01322e-16	1.52408e-14	-0.00232392
EZH2	clu_46762_?	i009	chr7:148847305-148884164	0.096943	0.0623077	6.01322e-16	1.52408e-14	-0.0346353
RBMX2	clu_4630_?	i001	chrX:130403853-130409257	0.151671	0.189131	6.41554e-16	1.61869e-14	0.0374602
RBMX2	clu_4630_?	i002	chrX:130403853-130411348	0.00208004	0.00198913	6.41554e-16	1.61869e-14	-9.09119e-05
RBMX2	clu_4630_?	i003	chrX:130409386-130411348	0.846249	0.80888	6.41554e-16	1.61869e-14	-0.0373693
MAPKAP1	clu_2338_?	i001	chr9:125657799-125669818	0.0897645	0.0923271	6.61793e-16	1.66223e-14	0.00256257
MAPKAP1	clu_2338_?	i002	chr9:125657799-125706971	0.00207911	0.00529308	6.61793e-16	1.66223e-14	0.00321396
MAPKAP1	clu_2338_?	i003	chr9:125669907-125672316	0.760056	0.714494	6.61793e-16	1.66223e-14	-0.0455619
MAPKAP1	clu_2338_?	i004	chr9:125669907-125672400	0.00738954	0.00791804	6.61793e-16	1.66223e-14	0.000528502
MAPKAP1	clu_2338_?	i005	chr9:125669907-125706971	0.0311708	0.0286935	6.61793e-16	1.66223e-14	-0.00247732
MAPKAP1	clu_2338_?	i006	chr9:125669927-125672316	0.00108208	0.00175075	6.61793e-16	1.66223e-14	0.00066867
MAPKAP1	clu_2338_?	i007	chr9:125672540-125706971	0.0060226	0.00870293	6.61793e-16	1.66223e-14	0.00268033
MAPKAP1	clu_2338_?	i008	chr9:125672643-125706971	0.100605	0.139613	6.61793e-16	1.66223e-14	0.0390078
MAPKAP1	clu_2338_?	i009	chr9:125705320-125706971	0.00183005	0.00120746	6.61793e-16	1.66223e-14	-0.000622594
ATP5PD	clu_33928_?	i001	chr17:75039271-75040092	0.578271	0.618354	6.65854e-16	1.66493e-14	0.0400823
ATP5PD	clu_33928_?	i002	chr17:75039271-75042181	0.00500848	0.00552289	6.65854e-16	1.66493e-14	0.000514416
ATP5PD	clu_33928_?	i003	chr17:75040163-75042181	0.41672	0.376124	6.65854e-16	1.66493e-14	-0.0405967
POLR2I	clu_23379_?	i001	chr19:36114412-36114659	0.635106	0.681122	6.95124e-16	1.73036e-14	0.0460163
POLR2I	clu_23379_?	i002	chr19:36114412-36114798	0.00539544	0.00470664	6.95124e-16	1.73036e-14	-0.0006888
POLR2I	clu_23379_?	i003	chr19:36114713-36114798	0.357619	0.31253	6.95124e-16	1.73036e-14	-0.0450887
POLR2I	clu_23379_?	i004	chr19:36114713-36115259	0.00187981	0.00164097	6.95124e-16	1.73036e-14	-0.000238842
RPL27A	clu_52095_?	i001	chr11:8684081-8684718	0.943942	0.962094	7.30485e-16	1.8103e-14	0.0181523
RPL27A	clu_52095_?	i002	chr11:8684081-8684823	0.0560585	0.0379062	7.30485e-16	1.8103e-14	-0.0181523
SEC11A	clu_10688_?	i001	chr15:84670782-84680713	0.107296	0.156469	7.57391e-16	1.86868e-14	0.0491733
SEC11A	clu_10688_?	i002	chr15:84670782-84687625	0.00446202	0.00651711	7.57391e-16	1.86868e-14	0.00205509
SEC11A	clu_10688_?	i003	chr15:84680832-84687625	0.223686	0.196329	7.57391e-16	1.86868e-14	-0.0273573
SEC11A	clu_10688_?	i004	chr15:84680832-84691535	0.0037673	0.00229043	7.57391e-16	1.86868e-14	-0.00147686
SEC11A	clu_10688_?	i005	chr15:84687774-84691535	0.397335	0.404818	7.57391e-16	1.86868e-14	0.00748254
SEC11A	clu_10688_?	i006	chr15:84687774-84716025	0.00356398	0.00197179	7.57391e-16	1.86868e-14	-0.00159219
SEC11A	clu_10688_?	i007	chr15:84691644-84714731	0.00892786	0.0108849	7.57391e-16	1.86868e-14	0.00195708
SEC11A	clu_10688_?	i008	chr15:84691644-84716025	0.240027	0.21454	7.57391e-16	1.86868e-14	-0.0254877
SEC11A	clu_10688_?	i009	chr15:84714866-84716025	0.010934	0.00618008	7.57391e-16	1.86868e-14	-0.00475395
TPT1	clu_15509_?	i001	chr13:45340184-45340712	0.665564	0.650321	8.39086e-16	2.06112e-14	-0.0152428
TPT1	clu_15509_?	i002	chr13:45340184-45341042	0.00254404	0.00214475	8.39086e-16	2.06112e-14	-0.000399284
TPT1	clu_15509_?	i003	chr13:45340785-45341042	0.331892	0.347534	8.39086e-16	2.06112e-14	0.0156421
AL096870.8	clu_25490_?	i001	chr14:24271310-24292198	0.00623934	0.00706012	8.87055e-16	2.16939e-14	0.000820786
AL096870.8	clu_25490_?	i002	chr14:24271310-24292437	0.0100366	0.0157218	8.87055e-16	2.16939e-14	0.00568524
AL096870.8	clu_25490_?	i003	chr14:24271310-24298614	0.632428	0.536174	8.87055e-16	2.16939e-14	-0.0962538
AL096870.8	clu_25490_?	i004	chr14:24292352-24292437	0.0148739	0.0314999	8.87055e-16	2.16939e-14	0.016626
AL096870.8	clu_25490_?	i005	chr14:24292600-24296333	0.0136311	0.0172256	8.87055e-16	2.16939e-14	0.00359446
AL096870.8	clu_25490_?	i006	chr14:24292600-24298614	0.303321	0.369086	8.87055e-16	2.16939e-14	0.0657652
AL096870.8	clu_25490_?	i007	chr14:24296365-24298614	0.0194703	0.0232325	8.87055e-16	2.16939e-14	0.00376219
DCTN1	clu_12361_?	i001	chr2:74371176-74371537	0.384386	0.396999	9.16867e-16	2.22605e-14	0.0126136
DCTN1	clu_12361_?	i002	chr2:74371176-74377432	0.00093586	0.00131681	9.16867e-16	2.22605e-14	0.00038095
DCTN1	clu_12361_?	i003	chr2:74371728-74372928	0.00590176	0.00417064	9.16867e-16	2.22605e-14	-0.00173112
DCTN1	clu_12361_?	i004	chr2:74371728-74377432	0.24314	0.31956	9.16867e-16	2.22605e-14	0.0764194
DCTN1	clu_12361_?	i005	chr2:74371728-74391794	0.00532315	0.00406908	9.16867e-16	2.22605e-14	-0.00125407
DCTN1	clu_12361_?	i006	chr2:74372948-74377432	0.00399022	0.0026207	9.16867e-16	2.22605e-14	-0.00136952
DCTN1	clu_12361_?	i007	chr2:74378245-74383753	0.0018989	0.000842705	9.16867e-16	2.22605e-14	-0.0010562
DCTN1	clu_12361_?	i008	chr2:74378245-74390583	0.00169835	0.00237385	9.16867e-16	2.22605e-14	0.000675495
DCTN1	clu_12361_?	i009	chr2:74378245-74391794	0.347293	0.26451	9.16867e-16	2.22605e-14	-0.0827834
DCTN1	clu_12361_?	i010	chr2:74383806-74391794	0.0036121	0.00237137	9.16867e-16	2.22605e-14	-0.00124074
DCTN1	clu_12361_?	i011	chr2:74390728-74391794	0.00182037	0.00116594	9.16867e-16	2.22605e-14	-0.000654428
TFDP2	clu_60524_?	i001	chr3:141978682-141993538	0.296225	0.348327	9.18205e-16	2.22605e-14	0.0521021
TFDP2	clu_60524_?	i002	chr3:141978682-142005441	0.00836386	0.00883471	9.18205e-16	2.22605e-14	0.000470855
TFDP2	clu_60524_?	i003	chr3:141978682-142028579	0.00124332	0.00111352	9.18205e-16	2.22605e-14	-0.000129807
TFDP2	clu_60524_?	i004	chr3:141993585-141995020	0.204032	0.210131	9.18205e-16	2.22605e-14	0.00609876
TFDP2	clu_60524_?	i005	chr3:141993585-142005441	0.00717122	0.0062885	9.18205e-16	2.22605e-14	-0.00088272
TFDP2	clu_60524_?	i006	chr3:141995141-142000252	0.00929311	0.00829789	9.18205e-16	2.22605e-14	-0.000995221
TFDP2	clu_60524_?	i007	chr3:141995141-142005441	0.242472	0.214385	9.18205e-16	2.22605e-14	-0.0280869
TFDP2	clu_60524_?	i008	chr3:141995141-142028579	0.00849133	0.00747051	9.18205e-16	2.22605e-14	-0.00102082
TFDP2	clu_60524_?	i009	chr3:141995141-142093061	0.00319327	0.00279754	9.18205e-16	2.22605e-14	-0.000395732
TFDP2	clu_60524_?	i010	chr3:142000354-142005441	0.00437565	0.00383426	9.18205e-16	2.22605e-14	-0.000541392
TFDP2	clu_60524_?	i011	chr3:142005544-142028579	0.172602	0.151253	9.18205e-16	2.22605e-14	-0.0213493
TFDP2	clu_60524_?	i012	chr3:142005544-142029042	0.0121342	0.0106311	9.18205e-16	2.22605e-14	-0.0015031
TFDP2	clu_60524_?	i013	chr3:142005544-142054115	0.00424467	0.00371855	9.18205e-16	2.22605e-14	-0.000526118
TFDP2	clu_60524_?	i014	chr3:142005544-142093061	0.0231191	0.0202549	9.18205e-16	2.22605e-14	-0.00286415
TFDP2	clu_60524_?	i015	chr3:142054149-142093061	0.00303895	0.00266247	9.18205e-16	2.22605e-14	-0.000376478
TCEA1	clu_16725_?	i001	chr8:54000050-54002892	0.00189532	0.00191833	9.43714e-16	2.27799e-14	2.30095e-05
TCEA1	clu_16725_?	i002	chr8:54000050-54010430	0.508693	0.484793	9.43714e-16	2.27799e-14	-0.0239007
TCEA1	clu_16725_?	i003	chr8:54000050-54022063	0.00924212	0.00900819	9.43714e-16	2.27799e-14	-0.000233927
TCEA1	clu_16725_?	i004	chr8:54010492-54021526	0.00425416	0.00438029	9.43714e-16	2.27799e-14	0.000126128
TCEA1	clu_16725_?	i005	chr8:54010492-54022063	0.475915	0.4999	9.43714e-16	2.27799e-14	0.0239855
COX16	clu_26328_?	i001	chr14:70329236-70342658	0.50577	0.591078	1.03374e-15	2.48455e-14	0.0853074
COX16	clu_26328_?	i002	chr14:70329236-70359519	0.0382234	0.0425278	1.03374e-15	2.48455e-14	0.0043044
COX16	clu_26328_?	i003	chr14:70342729-70353136	0.0227308	0.0187116	1.03374e-15	2.48455e-14	-0.00401927
COX16	clu_26328_?	i004	chr14:70342729-70359519	0.405101	0.32495	1.03374e-15	2.48455e-14	-0.0801517
COX16	clu_26328_?	i005	chr14:70353252-70359519	0.0281741	0.0227333	1.03374e-15	2.48455e-14	-0.00544078
KATNA1	clu_57842_?	i001	chr6:149623283-149632759	0.811461	0.756637	1.08261e-15	2.59082e-14	-0.0548233
KATNA1	clu_57842_?	i002	chr6:149623283-149638386	0.00122576	0.000952974	1.08261e-15	2.59082e-14	-0.00027279
KATNA1	clu_57842_?	i003	chr6:149623283-149648469	0.00138823	0.00154404	1.08261e-15	2.59082e-14	0.000155819
KATNA1	clu_57842_?	i004	chr6:149632916-149638386	0.148941	0.206859	1.08261e-15	2.59082e-14	0.0579185
KATNA1	clu_57842_?	i005	chr6:149632916-149648469	0.00530391	0.00436911	1.08261e-15	2.59082e-14	-0.000934792
KATNA1	clu_57842_?	i006	chr6:149638560-149648469	0.0316806	0.0296372	1.08261e-15	2.59082e-14	-0.00204345
CENPQ	clu_56740_?	i001	chr6:49463450-49470140	0.00243788	0.00296815	1.24051e-15	2.95602e-14	0.000530265
CENPQ	clu_56740_?	i002	chr6:49463453-49463777	0.00691024	0.0075249	1.24051e-15	2.95602e-14	0.000614662
CENPQ	clu_56740_?	i003	chr6:49463453-49470140	0.14855	0.119213	1.24051e-15	2.95602e-14	-0.0293375
CENPQ	clu_56740_?	i004	chr6:49463453-49470159	0.331072	0.261294	1.24051e-15	2.95602e-14	-0.0697774
CENPQ	clu_56740_?	i005	chr6:49463453-49470974	0.0256107	0.0216475	1.24051e-15	2.95602e-14	-0.00396321
CENPQ	clu_56740_?	i006	chr6:49470278-49470974	0.485419	0.587352	1.24051e-15	2.95602e-14	0.101933
NDUFB9	clu_17600_?	i001	chr8:124543279-124547000	0.127636	0.144373	1.32009e-15	3.13226e-14	0.0167366
NDUFB9	clu_17600_?	i002	chr8:124543279-124549761	0.00161633	0.000963407	1.32009e-15	3.13226e-14	-0.000652921
NDUFB9	clu_17600_?	i003	chr8:124547113-124549761	0.870747	0.854664	1.32009e-15	3.13226e-14	-0.0160837
C1orf35	clu_42464_?	i001	chr1:228102165-228102310	0.423779	0.38494	1.4478e-15	3.42074e-14	-0.038839
C1orf35	clu_42464_?	i002	chr1:228102165-228102478	0.00676401	0.00611572	1.4478e-15	3.42074e-14	-0.000648294
C1orf35	clu_42464_?	i003	chr1:228102195-228102310	0.0036111	0.00246183	1.4478e-15	3.42074e-14	-0.00114927
C1orf35	clu_42464_?	i004	chr1:228102382-228102478	0.466691	0.485914	1.4478e-15	3.42074e-14	0.0192222
C1orf35	clu_42464_?	i005	chr1:228102382-228102549	0.0013847	0.00128693	1.4478e-15	3.42074e-14	-9.77784e-05
C1orf35	clu_42464_?	i006	chr1:228102382-228102899	0.00367719	0.00344622	1.4478e-15	3.42074e-14	-0.000230974
C1orf35	clu_42464_?	i007	chr1:228102688-228102899	0.0940925	0.115836	1.4478e-15	3.42074e-14	0.0217431
MRPS17,NIPSNAP2	clu_44719_?	i001	chr7:55951930-55952590	0.0111757	0.00764591	1.57985e-15	3.71699e-14	-0.00352979
MRPS17,NIPSNAP2	clu_44719_?	i002	chr7:55951930-55953179	0.333664	0.231747	1.57985e-15	3.71699e-14	-0.101918
MRPS17,NIPSNAP2	clu_44719_?	i003	chr7:55951930-55954909	0.0319703	0.026295	1.57985e-15	3.71699e-14	-0.00567532
MRPS17,NIPSNAP2	clu_44719_?	i004	chr7:55951948-55953179	0.0151579	0.0178606	1.57985e-15	3.71699e-14	0.0027027
MRPS17,NIPSNAP2	clu_44719_?	i005	chr7:55953318-55954909	0.608032	0.716452	1.57985e-15	3.71699e-14	0.10842
JTB	clu_40737_?	i001	chr1:153975905-153976693	0.640454	0.707038	1.61778e-15	3.79022e-14	0.0665849
JTB	clu_40737_?	i002	chr1:153975905-153976976	0.0114388	0.012628	1.61778e-15	3.79022e-14	0.00118922
JTB	clu_40737_?	i003	chr1:153976775-153976976	0.348108	0.280334	1.61778e-15	3.79022e-14	-0.0677741
TYW3	clu_39466_?	i001	chr1:74736622-74738690	0.154843	0.176941	1.81664e-15	4.23833e-14	0.0220986
TYW3	clu_39466_?	i002	chr1:74736622-74748751	0.0383888	0.0382711	1.81664e-15	4.23833e-14	-0.000117747
TYW3	clu_39466_?	i003	chr1:74736622-74752292	0.00184467	0.00167228	1.81664e-15	4.23833e-14	-0.000172386
TYW3	clu_39466_?	i004	chr1:74738788-74748751	0.362053	0.366469	1.81664e-15	4.23833e-14	0.00441567
TYW3	clu_39466_?	i005	chr1:74738788-74752292	0.00185743	0.00110095	1.81664e-15	4.23833e-14	-0.000756478
TYW3	clu_39466_?	i006	chr1:74748822-74752292	0.441013	0.415545	1.81664e-15	4.23833e-14	-0.0254677
CHMP3	clu_12561_?	i001	chr2:86510479-86529218	0.463376	0.51692	2.41233e-15	5.57763e-14	0.0535441
CHMP3	clu_12561_?	i002	chr2:86510479-86563304	0.00800382	0.00675054	2.41233e-15	5.57763e-14	-0.00125328
CHMP3	clu_12561_?	i003	chr2:86527239-86529218	0.00238484	0.0016575	2.41233e-15	5.57763e-14	-0.000727343
CHMP3	clu_12561_?	i004	chr2:86527241-86529218	0.172306	0.190297	2.41233e-15	5.57763e-14	0.0179908
CHMP3	clu_12561_?	i005	chr2:86529397-86542252	0.0807703	0.0884915	2.41233e-15	5.57763e-14	0.00772118
CHMP3	clu_12561_?	i006	chr2:86529397-86563304	0.0029151	0.00343458	2.41233e-15	5.57763e-14	0.000519484
CHMP3	clu_12561_?	i007	chr2:86541364-86542252	0.0143242	0.0161015	2.41233e-15	5.57763e-14	0.00177724
CHMP3	clu_12561_?	i008	chr2:86542312-86563304	0.255919	0.176347	2.41233e-15	5.57763e-14	-0.0795722
UBAP2L	clu_40783_?	i001	chr1:154220244-154225084	0.00893876	0.00599477	2.43071e-15	5.57763e-14	-0.00294399
UBAP2L	clu_40783_?	i002	chr1:154220846-154225084	0.00381816	0.00197845	2.43071e-15	5.57763e-14	-0.00183971
UBAP2L	clu_40783_?	i003	chr1:154220975-154225084	0.222277	0.174942	2.43071e-15	5.57763e-14	-0.0473343
UBAP2L	clu_40783_?	i004	chr1:154220975-154227282	0.00538588	0.0041585	2.43071e-15	5.57763e-14	-0.00122738
UBAP2L	clu_40783_?	i005	chr1:154221040-154225084	0.10668	0.0802966	2.43071e-15	5.57763e-14	-0.0263831
UBAP2L	clu_40783_?	i006	chr1:154221040-154227282	0.00156695	0.0017775	2.43071e-15	5.57763e-14	0.000210554
UBAP2L	clu_40783_?	i007	chr1:154221396-154225084	0.0151987	0.0149663	2.43071e-15	5.57763e-14	-0.000232409
UBAP2L	clu_40783_?	i008	chr1:154225213-154227282	0.636135	0.715886	2.43071e-15	5.57763e-14	0.0797504
TRAP1	clu_49027_?	i001	chr16:3658230-3658793	0.677109	0.648587	2.41423e-15	5.57763e-14	-0.0285218
TRAP1	clu_49027_?	i002	chr16:3658230-3661987	0.00175252	0.00182065	2.41423e-15	5.57763e-14	6.81296e-05
TRAP1	clu_49027_?	i003	chr16:3658865-3661987	0.321139	0.349593	2.41423e-15	5.57763e-14	0.0284537
UMPS	clu_60162_?	i001	chr3:124730627-124731506	0.0108404	0.010783	2.42761e-15	5.57763e-14	-5.73961e-05
UMPS	clu_60162_?	i002	chr3:124730627-124735093	0.718025	0.598841	2.42761e-15	5.57763e-14	-0.119185
UMPS	clu_60162_?	i003	chr3:124730627-124737568	0.00536477	0.00808727	2.42761e-15	5.57763e-14	0.0027225
UMPS	clu_60162_?	i004	chr3:124731604-124735093	0.0233844	0.0187916	2.42761e-15	5.57763e-14	-0.00459282
UMPS	clu_60162_?	i005	chr3:124735246-124737568	0.242385	0.363497	2.42761e-15	5.57763e-14	0.121112
CCT7	clu_12296_?	i001	chr2:73250438-73251226	0.137995	0.0934095	2.57315e-15	5.88027e-14	-0.0445854
CCT7	clu_12296_?	i002	chr2:73250438-73252640	0.00487551	0.0058324	2.57315e-15	5.88027e-14	0.000956888
CCT7	clu_12296_?	i003	chr2:73251432-73252640	0.85713	0.900758	2.57315e-15	5.88027e-14	0.0436285
DYNLL2	clu_33364_?	i001	chr17:58083683-58087082	0.688873	0.560334	2.89009e-15	6.57761e-14	-0.128539
DYNLL2	clu_33364_?	i002	chr17:58083683-58089142	0.0193714	0.0273744	2.89009e-15	6.57761e-14	0.00800307
DYNLL2	clu_33364_?	i003	chr17:58085325-58087082	0.00219577	0.00310293	2.89009e-15	6.57761e-14	0.000907159
DYNLL2	clu_33364_?	i004	chr17:58087222-58089142	0.28956	0.409189	2.89009e-15	6.57761e-14	0.119629
SINHCAF	clu_28088_?	i001	chr12:31282871-31287634	0.891775	0.860293	2.9419e-15	6.6683e-14	-0.0314814
SINHCAF	clu_28088_?	i002	chr12:31282871-31293805	0.00254058	0.00227819	2.9419e-15	6.6683e-14	-0.000262384
SINHCAF	clu_28088_?	i003	chr12:31287784-31293805	0.105685	0.137429	2.9419e-15	6.6683e-14	0.0317438
DCAF1	clu_59324_?	i001	chr3:51483836-51490155	0.00906843	0.006232	4.02308e-15	9.08206e-14	-0.00283642
DCAF1	clu_59324_?	i002	chr3:51483836-51492389	0.245235	0.236244	4.02308e-15	9.08206e-14	-0.00899086
DCAF1	clu_59324_?	i003	chr3:51483836-51496734	0.108283	0.111681	4.02308e-15	9.08206e-14	0.00339738
DCAF1	clu_59324_?	i004	chr3:51483836-51499873	0.177977	0.118503	4.02308e-15	9.08206e-14	-0.0594739
DCAF1	clu_59324_?	i005	chr3:51490246-51492389	0.00365907	0.00387697	4.02308e-15	9.08206e-14	0.000217899
DCAF1	clu_59324_?	i006	chr3:51492488-51496734	0.0875843	0.108302	4.02308e-15	9.08206e-14	0.0207182
DCAF1	clu_59324_?	i007	chr3:51492488-51499873	0.00570761	0.00520745	4.02308e-15	9.08206e-14	-0.000500157
DCAF1	clu_59324_?	i008	chr3:51492513-51496734	0.0541384	0.0772938	4.02308e-15	9.08206e-14	0.0231554
DCAF1	clu_59324_?	i009	chr3:51492513-51499873	0.00138079	0.00147623	4.02308e-15	9.08206e-14	9.54411e-05
DCAF1	clu_59324_?	i010	chr3:51495892-51496734	0.00175683	0.00294648	4.02308e-15	9.08206e-14	0.00118965
DCAF1	clu_59324_?	i011	chr3:51496780-51499873	0.30521	0.328237	4.02308e-15	9.08206e-14	0.0230274
UBL5	clu_21802_?	i001	chr19:9827984-9828327	0.943169	0.919136	5.1622e-15	1.16066e-13	-0.0240327
UBL5	clu_21802_?	i002	chr19:9828064-9828327	0.056831	0.0808637	5.1622e-15	1.16066e-13	0.0240327
TMEM14B	clu_55133_?	i001	chr6:10747881-10749202	0.0311802	0.0293071	5.54129e-15	1.24089e-13	-0.00187318
TMEM14B	clu_55133_?	i002	chr6:10747881-10755142	0.0026476	0.00255456	5.54129e-15	1.24089e-13	-9.30375e-05
TMEM14B	clu_55133_?	i003	chr6:10747881-10756467	0.00235723	0.00223368	5.54129e-15	1.24089e-13	-0.000123556
TMEM14B	clu_55133_?	i004	chr6:10749268-10749622	0.028243	0.0310634	5.54129e-15	1.24089e-13	0.00282037
TMEM14B	clu_55133_?	i005	chr6:10749268-10755142	0.00262241	0.00320155	5.54129e-15	1.24089e-13	0.000579141
TMEM14B	clu_55133_?	i006	chr6:10749698-10751133	0.05985	0.0673043	5.54129e-15	1.24089e-13	0.00745429
TMEM14B	clu_55133_?	i007	chr6:10749698-10755142	0.0207091	0.023734	5.54129e-15	1.24089e-13	0.00302491
TMEM14B	clu_55133_?	i008	chr6:10749698-10756467	0.00242752	0.0023178	5.54129e-15	1.24089e-13	-0.000109723
TMEM14B	clu_55133_?	i009	chr6:10749698-10829007	0.00164918	0.00191172	5.54129e-15	1.24089e-13	0.000262539
TMEM14B	clu_55133_?	i010	chr6:10751234-10755142	0.260954	0.285347	5.54129e-15	1.24089e-13	0.0243924
TMEM14B	clu_55133_?	i011	chr6:10751234-10756467	0.00901848	0.00848427	5.54129e-15	1.24089e-13	-0.000534214
TMEM14B	clu_55133_?	i012	chr6:10751234-10829007	0.00307806	0.00290787	5.54129e-15	1.24089e-13	-0.000170186
TMEM14B	clu_55133_?	i013	chr6:10755209-10756467	0.00484376	0.00456676	5.54129e-15	1.24089e-13	-0.000277003
TMEM14B	clu_55133_?	i014	chr6:10755232-10756467	0.554044	0.519311	5.54129e-15	1.24089e-13	-0.0347334
TMEM14B	clu_55133_?	i015	chr6:10755232-10829007	0.00112647	0.00145229	5.54129e-15	1.24089e-13	0.000325813
TMEM14B	clu_55133_?	i016	chr6:10770204-10829007	0.0105198	0.00987074	5.54129e-15	1.24089e-13	-0.000649109
TMEM14B	clu_55133_?	i017	chr6:10770204-10857445	0.00160281	0.00150295	5.54129e-15	1.24089e-13	-9.98626e-05
TMEM14B	clu_55133_?	i018	chr6:10808342-10829007	0.00312592	0.00292981	5.54129e-15	1.24089e-13	-0.000196111
SART3	clu_29815_?	i001	chr12:108531280-108532222	0.67534	0.632566	5.78618e-15	1.29055e-13	-0.0427749
SART3	clu_29815_?	i002	chr12:108531280-108535359	0.00115856	0.00108705	5.78618e-15	1.29055e-13	-7.15104e-05
SART3	clu_29815_?	i003	chr12:108532334-108535359	0.323501	0.366347	5.78618e-15	1.29055e-13	0.0428464
TPRKB	clu_12309_?	i001	chr2:73732285-73732584	0.0892142	0.104093	6.41004e-15	1.424e-13	0.0148789
TPRKB	clu_12309_?	i002	chr2:73732285-73734429	0.345897	0.44092	6.41004e-15	1.424e-13	0.0950229
TPRKB	clu_12309_?	i003	chr2:73732285-73734528	0.0350399	0.0322018	6.41004e-15	1.424e-13	-0.00283804
TPRKB	clu_12309_?	i004	chr2:73732285-73737302	0.0124897	0.00781731	6.41004e-15	1.424e-13	-0.00467237
TPRKB	clu_12309_?	i005	chr2:73732700-73734429	0.0476247	0.042189	6.41004e-15	1.424e-13	-0.00543561
TPRKB	clu_12309_?	i006	chr2:73732704-73734429	0.00653406	0.00679175	6.41004e-15	1.424e-13	0.000257691
TPRKB	clu_12309_?	i007	chr2:73734588-73737302	0.126366	0.10937	6.41004e-15	1.424e-13	-0.0169959
TPRKB	clu_12309_?	i008	chr2:73734591-73737302	0.336835	0.256617	6.41004e-15	1.424e-13	-0.0802175
MTDH	clu_17224_?	i001	chr8:97713769-97719049	0.140836	0.165895	6.66732e-15	1.47528e-13	0.0250589
MTDH	clu_17224_?	i002	chr8:97713769-97722879	0.0279266	0.0265235	6.66732e-15	1.47528e-13	-0.00140318
MTDH	clu_17224_?	i003	chr8:97719189-97722879	0.831237	0.807582	6.66732e-15	1.47528e-13	-0.0236557
TMPO	clu_29551_?	i001	chr12:98537572-98544230	0.118439	0.128975	8.07315e-15	1.77928e-13	0.0105364
TMPO	clu_29551_?	i002	chr12:98537572-98544442	0.00616595	0.00487825	8.07315e-15	1.77928e-13	-0.0012877
TMPO	clu_29551_?	i003	chr12:98537572-98544951	0.0137396	0.0110459	8.07315e-15	1.77928e-13	-0.00269379
TMPO	clu_29551_?	i004	chr12:98537572-98546359	0.00956471	0.00886199	8.07315e-15	1.77928e-13	-0.000702721
TMPO	clu_29551_?	i005	chr12:98544349-98544442	0.389261	0.419831	8.07315e-15	1.77928e-13	0.0305697
TMPO	clu_29551_?	i006	chr12:98544537-98544951	0.401358	0.36462	8.07315e-15	1.77928e-13	-0.0367379
TMPO	clu_29551_?	i007	chr12:98545061-98546359	0.0614722	0.0617882	8.07315e-15	1.77928e-13	0.000315985
TMEM167A	clu_18983_?	i001	chr5:83023445-83044563	0.00722396	0.0051699	8.82929e-15	1.93827e-13	-0.00205406
TMEM167A	clu_18983_?	i002	chr5:83023445-83061877	0.0193457	0.020021	8.82929e-15	1.93827e-13	0.00067532
TMEM167A	clu_18983_?	i003	chr5:83044629-83061877	0.0053737	0.00627247	8.82929e-15	1.93827e-13	0.000898775
TMEM167A	clu_18983_?	i004	chr5:83057154-83061877	0.424387	0.464506	8.82929e-15	1.93827e-13	0.040119
TMEM167A	clu_18983_?	i005	chr5:83057154-83077321	0.00183842	0.00133932	8.82929e-15	1.93827e-13	-0.000499094
TMEM167A	clu_18983_?	i006	chr5:83061911-83065008	0.252852	0.296718	8.82929e-15	1.93827e-13	0.043866
TMEM167A	clu_18983_?	i007	chr5:83061911-83077321	0.0450119	0.0321367	8.82929e-15	1.93827e-13	-0.0128753
TMEM167A	clu_18983_?	i008	chr5:83065117-83077321	0.243967	0.173837	8.82929e-15	1.93827e-13	-0.0701306
FKBP11	clu_28290_?	i001	chr12:48922201-48923782	0.713114	0.684195	9.89995e-15	2.16479e-13	-0.0289186
FKBP11	clu_28290_?	i002	chr12:48922201-48924223	0.00473025	0.00455132	9.89995e-15	2.16479e-13	-0.000178939
FKBP11	clu_28290_?	i003	chr12:48923604-48923782	0.00720619	0.00809509	9.89995e-15	2.16479e-13	0.000888898
FKBP11	clu_28290_?	i004	chr12:48923852-48924223	0.27495	0.303159	9.89995e-15	2.16479e-13	0.0282087
PSMD4	clu_40610_?	i001	chr1:151254808-151262161	0.101044	0.0930572	1.00905e-14	2.18345e-13	-0.00798665
PSMD4	clu_40610_?	i002	chr1:151254808-151263914	0.0122693	0.011199	1.00905e-14	2.18345e-13	-0.00107028
PSMD4	clu_40610_?	i003	chr1:151254808-151264832	0.00209789	0.00194435	1.00905e-14	2.18345e-13	-0.000153542
PSMD4	clu_40610_?	i004	chr1:151262301-151263914	0.36909	0.415382	1.00905e-14	2.18345e-13	0.046292
PSMD4	clu_40610_?	i005	chr1:151264028-151264832	0.515499	0.478418	1.00905e-14	2.18345e-13	-0.0370815
BCAP29	clu_46191_?	i001	chr7:107583982-107593955	0.201864	0.248281	1.00783e-14	2.18345e-13	0.0464169
BCAP29	clu_46191_?	i002	chr7:107583982-107595867	0.00323248	0.00344138	1.00783e-14	2.18345e-13	0.000208894
BCAP29	clu_46191_?	i003	chr7:107594057-107595867	0.00284701	0.00108765	1.00783e-14	2.18345e-13	-0.00175937
BCAP29	clu_46191_?	i004	chr7:107594105-107595867	0.792057	0.74719	1.00783e-14	2.18345e-13	-0.0448664
NUDT5	clu_6769_?	i001	chr10:12167811-12170717	0.562122	0.536278	1.01028e-14	2.18345e-13	-0.0258446
NUDT5	clu_6769_?	i002	chr10:12167811-12170820	0.00400368	0.00414118	1.01028e-14	2.18345e-13	0.000137503
NUDT5	clu_6769_?	i003	chr10:12167811-12170900	0.00681177	0.00663178	1.01028e-14	2.18345e-13	-0.000179989
NUDT5	clu_6769_?	i004	chr10:12170770-12170900	0.230774	0.24276	1.01028e-14	2.18345e-13	0.0119864
NUDT5	clu_6769_?	i005	chr10:12170770-12172765	0.0010236	0.00109203	1.01028e-14	2.18345e-13	6.84317e-05
NUDT5	clu_6769_?	i006	chr10:12170908-12172765	0.195265	0.209097	1.01028e-14	2.18345e-13	0.0138322
NUMB	clu_26438_?	i001	chr14:73355766-73357278	0.00195537	0.00274619	1.09697e-14	2.36167e-13	0.00079082
NUMB	clu_26438_?	i002	chr14:73355766-73357474	0.00734801	0.0085404	1.09697e-14	2.36167e-13	0.00119239
NUMB	clu_26438_?	i003	chr14:73355766-73366897	0.159452	0.192903	1.09697e-14	2.36167e-13	0.0334503
NUMB	clu_26438_?	i004	chr14:73355766-73409937	0.053228	0.0656869	1.09697e-14	2.36167e-13	0.0124589
NUMB	clu_26438_?	i005	chr14:73355766-73458493	0.00353318	0.00353862	1.09697e-14	2.36167e-13	5.43675e-06
NUMB	clu_26438_?	i006	chr14:73357375-73357474	0.000543091	0.00119294	1.09697e-14	2.36167e-13	0.000649846
NUMB	clu_26438_?	i007	chr14:73357375-73366897	0.000730273	0.00159246	1.09697e-14	2.36167e-13	0.000862185
NUMB	clu_26438_?	i008	chr14:73357595-73366897	0.0135379	0.0140058	1.09697e-14	2.36167e-13	0.000467935
NUMB	clu_26438_?	i009	chr14:73357595-73409937	0.00157854	0.00144286	1.09697e-14	2.36167e-13	-0.000135679
NUMB	clu_26438_?	i010	chr14:73366981-73409937	0.16977	0.188919	1.09697e-14	2.36167e-13	0.0191492
NUMB	clu_26438_?	i011	chr14:73366981-73458493	0.0133716	0.0116005	1.09697e-14	2.36167e-13	-0.00177119
NUMB	clu_26438_?	i012	chr14:73410068-73424669	0.00127918	0.00285023	1.09697e-14	2.36167e-13	0.00157105
NUMB	clu_26438_?	i013	chr14:73410068-73448807	0.00169728	0.00121817	1.09697e-14	2.36167e-13	-0.000479111
NUMB	clu_26438_?	i014	chr14:73410068-73457629	0.00596689	0.0133313	1.09697e-14	2.36167e-13	0.00736437
NUMB	clu_26438_?	i015	chr14:73410068-73458021	0.00193995	0.00157983	1.09697e-14	2.36167e-13	-0.000360114
NUMB	clu_26438_?	i016	chr14:73410068-73458168	0.0030554	0.00128494	1.09697e-14	2.36167e-13	-0.00177046
NUMB	clu_26438_?	i017	chr14:73410068-73458267	0.0173656	0.0118289	1.09697e-14	2.36167e-13	-0.0055367
NUMB	clu_26438_?	i018	chr14:73410068-73458493	0.541225	0.472593	1.09697e-14	2.36167e-13	-0.0686322
NUMB	clu_26438_?	i019	chr14:73424728-73458493	0.00242231	0.00314538	1.09697e-14	2.36167e-13	0.000723073
KIF23	clu_10233_?	i001	chr15:69436261-69436564	0.346787	0.421207	1.14112e-14	2.44726e-13	0.0744201
KIF23	clu_10233_?	i002	chr15:69436261-69438248	0.00199859	0.00242628	1.14112e-14	2.44726e-13	0.000427691
KIF23	clu_10233_?	i003	chr15:69436722-69438248	0.651214	0.576367	1.14112e-14	2.44726e-13	-0.0748478
GLRX3	clu_8868_?	i001	chr10:130174906-130174997	0.327945	0.278564	1.34839e-14	2.88069e-13	-0.0493811
GLRX3	clu_8868_?	i002	chr10:130174906-130179342	0.00192817	0.00169554	1.34839e-14	2.88069e-13	-0.000232628
GLRX3	clu_8868_?	i003	chr10:130175089-130179342	0.524249	0.567788	1.34839e-14	2.88069e-13	0.0435387
GLRX3	clu_8868_?	i004	chr10:130175089-130180113	0.00330938	0.00298242	1.34839e-14	2.88069e-13	-0.000326956
GLRX3	clu_8868_?	i005	chr10:130179420-130180113	0.142568	0.14897	1.34839e-14	2.88069e-13	0.00640198
HNRNPA3	clu_13778_?	i001	chr2:177219314-177219408	0.766085	0.827613	1.42355e-14	3.02967e-13	0.0615279
HNRNPA3	clu_13778_?	i002	chr2:177219314-177219562	0.0225286	0.0246221	1.42355e-14	3.02967e-13	0.00209351
HNRNPA3	clu_13778_?	i003	chr2:177219314-177222060	0.211386	0.147765	1.42355e-14	3.02967e-13	-0.0636214
TBCA	clu_18876_?	i001	chr5:77691498-77693266	0.725946	0.760164	1.46412e-14	3.10415e-13	0.0342178
TBCA	clu_18876_?	i002	chr5:77691498-77708242	0.00335383	0.00276479	1.46412e-14	3.10415e-13	-0.000589041
TBCA	clu_18876_?	i003	chr5:77693352-77708242	0.2707	0.237071	1.46412e-14	3.10415e-13	-0.0336288
CHI3L2	clu_40015_?	i001	chr1:111238932-111241327	0.0121556	0.0108336	2.10074e-14	4.43701e-13	-0.00132203
CHI3L2	clu_40015_?	i002	chr1:111241443-111242227	0.0753358	0.0943537	2.10074e-14	4.43701e-13	0.0190179
CHI3L2	clu_40015_?	i003	chr1:111241443-111243217	0.0038941	0.00485617	2.10074e-14	4.43701e-13	0.000962063
CHI3L2	clu_40015_?	i004	chr1:111242366-111243217	0.908614	0.889957	2.10074e-14	4.43701e-13	-0.018658
UBE2N	clu_29415_?	i001	chr12:93410079-93410734	0.808374	0.770982	2.19878e-14	4.62657e-13	-0.0373925
UBE2N	clu_29415_?	i002	chr12:93410079-93411053	0.00618657	0.00701756	2.19878e-14	4.62657e-13	0.000830996
UBE2N	clu_29415_?	i003	chr12:93410079-93411126	0.000986161	0.000918139	2.19878e-14	4.62657e-13	-6.80224e-05
UBE2N	clu_29415_?	i004	chr12:93410874-93411053	0.183117	0.219558	2.19878e-14	4.62657e-13	0.0364415
UBE2N	clu_29415_?	i005	chr12:93410874-93411126	0.00133643	0.00152438	2.19878e-14	4.62657e-13	0.000187951
MRPL21	clu_53838_?	i001	chr11:68898012-68900535	0.0224413	0.024636	2.46782e-14	5.17314e-13	0.00219463
MRPL21	clu_53838_?	i002	chr11:68898012-68900548	0.413147	0.536674	2.46782e-14	5.17314e-13	0.123527
MRPL21	clu_53838_?	i003	chr11:68898012-68903723	0.00924297	0.0053174	2.46782e-14	5.17314e-13	-0.00392557
MRPL21	clu_53838_?	i004	chr11:68900605-68903723	0.555169	0.433373	2.46782e-14	5.17314e-13	-0.121796
IMPA1	clu_17056_?	i001	chr8:81681560-81686252	0.00641461	0.00631021	3.30281e-14	6.89756e-13	-0.000104398
IMPA1	clu_17056_?	i002	chr8:81681563-81686252	0.0201258	0.0184374	3.30281e-14	6.89756e-13	-0.0016884
IMPA1	clu_17056_?	i003	chr8:81681584-81685763	0.0866641	0.129557	3.30281e-14	6.89756e-13	0.0428934
IMPA1	clu_17056_?	i004	chr8:81681584-81686252	0.86077	0.810093	3.30281e-14	6.89756e-13	-0.0506777
IMPA1	clu_17056_?	i005	chr8:81685963-81686252	0.0260253	0.0356024	3.30281e-14	6.89756e-13	0.00957715
MEF2A	clu_10888_?	i001	chr15:99565669-99598430	0.00951607	0.0173228	3.69391e-14	7.68555e-13	0.00780678
MEF2A	clu_10888_?	i002	chr15:99565669-99632978	0.00291485	0.00262654	3.69391e-14	7.68555e-13	-0.000288317
MEF2A	clu_10888_?	i003	chr15:99566104-99568941	0.0024087	0.00239655	3.69391e-14	7.68555e-13	-1.21514e-05
MEF2A	clu_10888_?	i004	chr15:99566104-99598430	0.574754	0.540267	3.69391e-14	7.68555e-13	-0.0344867
MEF2A	clu_10888_?	i005	chr15:99566104-99632978	0.0840985	0.0636867	3.69391e-14	7.68555e-13	-0.0204118
MEF2A	clu_10888_?	i006	chr15:99566599-99598430	0.0118775	0.012194	3.69391e-14	7.68555e-13	0.000316555
MEF2A	clu_10888_?	i007	chr15:99566762-99598430	0.00312156	0.00345854	3.69391e-14	7.68555e-13	0.000336977
MEF2A	clu_10888_?	i008	chr15:99568979-99598430	0.00201145	0.00365815	3.69391e-14	7.68555e-13	0.0016467
MEF2A	clu_10888_?	i009	chr15:99598511-99601941	0.00289079	0.00388524	3.69391e-14	7.68555e-13	0.000994444
MEF2A	clu_10888_?	i010	chr15:99598511-99616431	0.00217046	0.00384298	3.69391e-14	7.68555e-13	0.00167252
MEF2A	clu_10888_?	i011	chr15:99598511-99620864	0.00456293	0.0072824	3.69391e-14	7.68555e-13	0.00271947
MEF2A	clu_10888_?	i012	chr15:99598511-99620873	0.00111119	0.00201386	3.69391e-14	7.68555e-13	0.000902672
MEF2A	clu_10888_?	i013	chr15:99598511-99626822	0.00189895	0.00239927	3.69391e-14	7.68555e-13	0.000500325
MEF2A	clu_10888_?	i014	chr15:99598511-99631083	0.00132724	0.00234925	3.69391e-14	7.68555e-13	0.00102201
MEF2A	clu_10888_?	i015	chr15:99598511-99632978	0.219219	0.24299	3.69391e-14	7.68555e-13	0.0237714
MEF2A	clu_10888_?	i016	chr15:99602109-99632978	0.0055762	0.00495926	3.69391e-14	7.68555e-13	-0.000616939
MEF2A	clu_10888_?	i017	chr15:99616464-99632978	0.00168046	0.00295201	3.69391e-14	7.68555e-13	0.00127155
MEF2A	clu_10888_?	i018	chr15:99621080-99626822	0.00101937	0.00114679	3.69391e-14	7.68555e-13	0.000127421
MEF2A	clu_10888_?	i019	chr15:99621080-99632978	0.0604218	0.0715072	3.69391e-14	7.68555e-13	0.0110854
MEF2A	clu_10888_?	i020	chr15:99626880-99632978	0.00366158	0.00329622	3.69391e-14	7.68555e-13	-0.00036536
MEF2A	clu_10888_?	i021	chr15:99631187-99632978	0.00375761	0.00576469	3.69391e-14	7.68555e-13	0.00200708
PCM1	clu_16242_?	i001	chr8:17923188-17924713	0.340561	0.377671	3.80145e-14	7.87988e-13	0.0371101
PCM1	clu_16242_?	i002	chr8:17923188-17935589	0.0453007	0.0449544	3.80145e-14	7.87988e-13	-0.000346381
PCM1	clu_16242_?	i003	chr8:17923397-17924713	0.00632564	0.00570674	3.80145e-14	7.87988e-13	-0.000618896
PCM1	clu_16242_?	i004	chr8:17923774-17924713	0.00271689	0.00205772	3.80145e-14	7.87988e-13	-0.000659171
PCM1	clu_16242_?	i005	chr8:17924217-17924713	0.00507204	0.00308795	3.80145e-14	7.87988e-13	-0.00198409
PCM1	clu_16242_?	i006	chr8:17924264-17924713	0.0323149	0.0226948	3.80145e-14	7.87988e-13	-0.00962013
PCM1	clu_16242_?	i007	chr8:17924780-17934706	0.00487893	0.00550438	3.80145e-14	7.87988e-13	0.000625449
PCM1	clu_16242_?	i008	chr8:17924780-17935589	0.53845	0.510891	3.80145e-14	7.87988e-13	-0.0275593
PCM1	clu_16242_?	i009	chr8:17929211-17935589	0.00278835	0.00302964	3.80145e-14	7.87988e-13	0.00024129
PCM1	clu_16242_?	i010	chr8:17934858-17935589	0.0215912	0.0244024	3.80145e-14	7.87988e-13	0.00281114
DAD1	clu_25308_?	i001	chr14:22565137-22566268	0.00291907	0.00364724	4.3578e-14	8.99966e-13	0.000728176
DAD1	clu_25308_?	i002	chr14:22565137-22567088	0.00378104	0.00395661	4.3578e-14	8.99966e-13	0.000175568
DAD1	clu_25308_?	i003	chr14:22565137-22571879	0.00335896	0.00361796	4.3578e-14	8.99966e-13	0.000258997
DAD1	clu_25308_?	i004	chr14:22565137-22575059	0.879461	0.898011	4.3578e-14	8.99966e-13	0.0185494
DAD1	clu_25308_?	i005	chr14:22565137-22588947	0.00278693	0.00230521	4.3578e-14	8.99966e-13	-0.000481718
DAD1	clu_25308_?	i006	chr14:22575233-22588947	0.107693	0.0884623	4.3578e-14	8.99966e-13	-0.0192304
FAM107B	clu_6839_?	i001	chr10:14530511-14604240	0.00254036	0.00175826	5.00618e-14	1.03005e-12	-0.000782099
FAM107B	clu_6839_?	i002	chr10:14530515-14538520	0.00641738	0.00685999	5.00618e-14	1.03005e-12	0.000442612
FAM107B	clu_6839_?	i003	chr10:14530515-14542579	0.00550153	0.00610513	5.00618e-14	1.03005e-12	0.000603599
FAM107B	clu_6839_?	i004	chr10:14530515-14553322	0.372091	0.409543	5.00618e-14	1.03005e-12	0.0374518
FAM107B	clu_6839_?	i005	chr10:14530515-14556362	0.00144173	0.0016093	5.00618e-14	1.03005e-12	0.000167572
FAM107B	clu_6839_?	i006	chr10:14530515-14595624	0.0105581	0.00802947	5.00618e-14	1.03005e-12	-0.00252865
FAM107B	clu_6839_?	i007	chr10:14530515-14604240	0.462158	0.409245	5.00618e-14	1.03005e-12	-0.0529128
FAM107B	clu_6839_?	i008	chr10:14553387-14554104	0.00165253	0.00186032	5.00618e-14	1.03005e-12	0.000207784
FAM107B	clu_6839_?	i009	chr10:14553387-14556362	0.00471981	0.00530886	5.00618e-14	1.03005e-12	0.000589048
FAM107B	clu_6839_?	i010	chr10:14553387-14595624	0.00356497	0.00400274	5.00618e-14	1.03005e-12	0.000437766
FAM107B	clu_6839_?	i011	chr10:14553387-14604240	0.115175	0.129739	5.00618e-14	1.03005e-12	0.0145645
FAM107B	clu_6839_?	i012	chr10:14556405-14604240	0.00231796	0.00260339	5.00618e-14	1.03005e-12	0.000285429
FAM107B	clu_6839_?	i013	chr10:14595680-14604240	0.00873048	0.00981979	5.00618e-14	1.03005e-12	0.0010893
FAM107B	clu_6839_?	i014	chr10:14602850-14604240	0.00313097	0.00351502	5.00618e-14	1.03005e-12	0.000384049
EPRS	clu_42292_?	i001	chr1:220024456-220025132	0.372304	0.407585	5.55764e-14	1.13932e-12	0.0352814
EPRS	clu_42292_?	i002	chr1:220024456-220030386	0.00190077	0.00204355	5.55764e-14	1.13932e-12	0.000142782
EPRS	clu_42292_?	i003	chr1:220025258-220025669	0.00146563	0.00159874	5.55764e-14	1.13932e-12	0.000133106
EPRS	clu_42292_?	i004	chr1:220025258-220030386	0.62252	0.586813	5.55764e-14	1.13932e-12	-0.0357076
EPRS	clu_42292_?	i005	chr1:220025713-220030386	0.0018094	0.00195973	5.55764e-14	1.13932e-12	0.000150333
RTF1	clu_9323_?	i001	chr15:41438431-41440212	0.00749741	0.00446627	5.62812e-14	1.14954e-12	-0.00303114
RTF1	clu_9323_?	i002	chr15:41438431-41452901	0.208129	0.158926	5.62812e-14	1.14954e-12	-0.0492034
RTF1	clu_9323_?	i003	chr15:41438431-41457672	0.0275124	0.0280233	5.62812e-14	1.14954e-12	0.000510956
RTF1	clu_9323_?	i004	chr15:41453048-41457672	0.756861	0.808585	5.62812e-14	1.14954e-12	0.0517236
QARS	clu_59119_?	i001	chr3:49096079-49097992	0.71236	0.672559	5.67089e-14	1.15405e-12	-0.0398015
QARS	clu_59119_?	i002	chr3:49096079-49098192	0.0305457	0.0313923	5.67089e-14	1.15405e-12	0.000846653
QARS	clu_59119_?	i003	chr3:49098117-49098192	0.257094	0.296049	5.67089e-14	1.15405e-12	0.0389548
SMC5	clu_1557_?	i001	chr9:70267975-70276669	0.00255411	0.00175339	5.80277e-14	1.17659e-12	-0.000800719
SMC5	clu_1557_?	i002	chr9:70267975-70277310	0.259116	0.313578	5.80277e-14	1.17659e-12	0.0544623
SMC5	clu_1557_?	i003	chr9:70267975-70280759	0.00199463	0.0018484	5.80277e-14	1.17659e-12	-0.000146221
SMC5	clu_1557_?	i004	chr9:70276731-70277310	0.00389295	0.00344189	5.80277e-14	1.17659e-12	-0.000451057
SMC5	clu_1557_?	i005	chr9:70278625-70280759	0.278913	0.278587	5.80277e-14	1.17659e-12	-0.00032632
SMC5	clu_1557_?	i006	chr9:70278625-70282422	0.00305943	0.00231941	5.80277e-14	1.17659e-12	-0.000740013
SMC5	clu_1557_?	i007	chr9:70280899-70282422	0.450469	0.398471	5.80277e-14	1.17659e-12	-0.0519979
SRRM2	clu_48919_?	i001	chr16:2752846-2756334	0.0456948	0.0483209	6.00827e-14	1.21385e-12	0.00262618
SRRM2	clu_48919_?	i002	chr16:2752846-2757472	0.129318	0.14931	6.00827e-14	1.21385e-12	0.0199919
SRRM2	clu_48919_?	i003	chr16:2752854-2756334	0.012095	0.0137294	6.00827e-14	1.21385e-12	0.00163436
SRRM2	clu_48919_?	i004	chr16:2752854-2757472	0.0298058	0.0360294	6.00827e-14	1.21385e-12	0.00622361
SRRM2	clu_48919_?	i005	chr16:2756606-2757472	0.783087	0.752611	6.00827e-14	1.21385e-12	-0.0304761
UPF3A	clu_16104_?	i001	chr13:114282127-114282837	0.0920957	0.0908521	6.07805e-14	1.21911e-12	-0.00124363
UPF3A	clu_16104_?	i002	chr13:114282127-114286519	0.0113042	0.0109391	6.07805e-14	1.21911e-12	-0.000365065
UPF3A	clu_16104_?	i003	chr13:114282652-114282837	0.00588697	0.00561431	6.07805e-14	1.21911e-12	-0.000272663
UPF3A	clu_16104_?	i004	chr13:114282943-114284094	0.001244	0.0012068	6.07805e-14	1.21911e-12	-3.7202e-05
UPF3A	clu_16104_?	i005	chr13:114282943-114286259	0.00250273	0.00246736	6.07805e-14	1.21911e-12	-3.53647e-05
UPF3A	clu_16104_?	i006	chr13:114282943-114286302	0.0440887	0.0480206	6.07805e-14	1.21911e-12	0.00393189
UPF3A	clu_16104_?	i007	chr13:114282943-114286519	0.12122	0.139931	6.07805e-14	1.21911e-12	0.0187108
UPF3A	clu_16104_?	i008	chr13:114282943-114291489	0.00555166	0.00536527	6.07805e-14	1.21911e-12	-0.000186391
UPF3A	clu_16104_?	i009	chr13:114284358-114286302	0.00110773	0.00107958	6.07805e-14	1.21911e-12	-2.81517e-05
UPF3A	clu_16104_?	i010	chr13:114284358-114286519	0.00568519	0.00546071	6.07805e-14	1.21911e-12	-0.000224487
UPF3A	clu_16104_?	i011	chr13:114286400-114286519	0.116206	0.128333	6.07805e-14	1.21911e-12	0.0121267
UPF3A	clu_16104_?	i012	chr13:114286629-114287313	0.00382905	0.00365921	6.07805e-14	1.21911e-12	-0.000169843
UPF3A	clu_16104_?	i013	chr13:114286629-114291489	0.357503	0.337977	6.07805e-14	1.21911e-12	-0.0195264
UPF3A	clu_16104_?	i014	chr13:114286629-114291601	0.00742139	0.00702511	6.07805e-14	1.21911e-12	-0.000396273
UPF3A	clu_16104_?	i015	chr13:114286629-114291605	0.00243353	0.00231654	6.07805e-14	1.21911e-12	-0.000116996
UPF3A	clu_16104_?	i016	chr13:114286629-114291634	0.00328985	0.0031189	6.07805e-14	1.21911e-12	-0.000170947
UPF3A	clu_16104_?	i017	chr13:114291544-114291634	0.218629	0.206633	6.07805e-14	1.21911e-12	-0.0119959
LY96	clu_16995_?	i001	chr8:73991554-74004796	0.0122785	0.0159845	6.06622e-14	1.21911e-12	0.003706
LY96	clu_16995_?	i002	chr8:73991554-74010001	0.0107922	0.013063	6.06622e-14	1.21911e-12	0.00227076
LY96	clu_16995_?	i003	chr8:74004885-74010001	0.0785438	0.103131	6.06622e-14	1.21911e-12	0.0245874
LY96	clu_16995_?	i004	chr8:74004885-74026789	0.00117785	0.00111165	6.06622e-14	1.21911e-12	-6.62015e-05
LY96	clu_16995_?	i005	chr8:74010129-74026789	0.44851	0.452485	6.06622e-14	1.21911e-12	0.00397459
LY96	clu_16995_?	i006	chr8:74010129-74028956	0.00192649	0.00178174	6.06622e-14	1.21911e-12	-0.000144749
LY96	clu_16995_?	i007	chr8:74026841-74028956	0.443711	0.409588	6.06622e-14	1.21911e-12	-0.0341227
LY96	clu_16995_?	i008	chr8:74027150-74028956	0.00306014	0.00285502	6.06622e-14	1.21911e-12	-0.000205115
PDCD4	clu_8558_?	i001	chr10:110872018-110875966	0.814328	0.774394	6.90554e-14	1.38012e-12	-0.0399342
PDCD4	clu_8558_?	i002	chr10:110872018-110881233	0.00730647	0.00735684	6.90554e-14	1.38012e-12	5.03675e-05
PDCD4	clu_8558_?	i003	chr10:110873106-110875966	0.00248609	0.00270681	6.90554e-14	1.38012e-12	0.000220722
PDCD4	clu_8558_?	i004	chr10:110876070-110876670	0.00409907	0.0055795	6.90554e-14	1.38012e-12	0.00148043
PDCD4	clu_8558_?	i005	chr10:110876070-110881233	0.151493	0.183697	6.90554e-14	1.38012e-12	0.0322041
PDCD4	clu_8558_?	i006	chr10:110876070-110881275	0.0161719	0.0216906	6.90554e-14	1.38012e-12	0.00551875
PDCD4	clu_8558_?	i007	chr10:110876753-110881233	0.0041158	0.00457566	6.90554e-14	1.38012e-12	0.000459859
USP46	clu_35372_?	i001	chr4:52626247-52627950	0.770491	0.702104	7.36711e-14	1.46711e-12	-0.0683866
USP46	clu_35372_?	i002	chr4:52626247-52631064	0.00153456	0.0014149	7.36711e-14	1.46711e-12	-0.000119658
USP46	clu_35372_?	i003	chr4:52628023-52631064	0.00157557	0.00149569	7.36711e-14	1.46711e-12	-7.98799e-05
USP46	clu_35372_?	i004	chr4:52628127-52631064	0.00272834	0.00655784	7.36711e-14	1.46711e-12	0.0038295
USP46	clu_35372_?	i005	chr4:52628163-52629634	0.00225312	0.00319	7.36711e-14	1.46711e-12	0.000936877
USP46	clu_35372_?	i006	chr4:52628163-52631064	0.221417	0.285237	7.36711e-14	1.46711e-12	0.0638198
TLK1	clu_13628_?	i001	chr2:171082852-171091614	0.0042021	0.00319874	8.22828e-14	1.63277e-12	-0.00100336
TLK1	clu_13628_?	i002	chr2:171082852-171091965	0.0064342	0.00500423	8.22828e-14	1.63277e-12	-0.00142998
TLK1	clu_13628_?	i003	chr2:171082852-171117739	0.430019	0.386279	8.22828e-14	1.63277e-12	-0.0437393
TLK1	clu_13628_?	i004	chr2:171082852-171160290	0.00663123	0.00815021	8.22828e-14	1.63277e-12	0.00151899
TLK1	clu_13628_?	i005	chr2:171092227-171117739	0.0912248	0.0878737	8.22828e-14	1.63277e-12	-0.00335114
TLK1	clu_13628_?	i006	chr2:171092267-171117739	0.0131913	0.0100229	8.22828e-14	1.63277e-12	-0.00316839
TLK1	clu_13628_?	i007	chr2:171117857-171159588	0.00230161	0.00174549	8.22828e-14	1.63277e-12	-0.000556124
TLK1	clu_13628_?	i008	chr2:171117857-171160290	0.445996	0.497725	8.22828e-14	1.63277e-12	0.0517293
MRPL52	clu_25331_?	i001	chr14:22829940-22830050	0.220122	0.202045	8.62779e-14	1.70598e-12	-0.0180765
MRPL52	clu_25331_?	i002	chr14:22829940-22830053	0.125484	0.117353	8.62779e-14	1.70598e-12	-0.00813131
MRPL52	clu_25331_?	i003	chr14:22829940-22830187	0.00485963	0.00455357	8.62779e-14	1.70598e-12	-0.00030606
MRPL52	clu_25331_?	i004	chr14:22829944-22830050	0.00944878	0.00879226	8.62779e-14	1.70598e-12	-0.000656523
MRPL52	clu_25331_?	i005	chr14:22829944-22830053	0.0045948	0.00422725	8.62779e-14	1.70598e-12	-0.000367548
MRPL52	clu_25331_?	i006	chr14:22829948-22830050	0.0304663	0.0282186	8.62779e-14	1.70598e-12	-0.00224768
MRPL52	clu_25331_?	i007	chr14:22830110-22830187	0.605025	0.63481	8.62779e-14	1.70598e-12	0.0297856
MKKS,AL034430.1	clu_47257_?	i001	chr20:10413931-10420528	0.891941	0.926089	1.05504e-13	2.07876e-12	0.0341475
MKKS,AL034430.1	clu_47257_?	i002	chr20:10413931-10434108	0.00184529	0.00166243	1.05504e-13	2.07876e-12	-0.000182865
MKKS,AL034430.1	clu_47257_?	i003	chr20:10420758-10434108	0.106213	0.0722486	1.05504e-13	2.07876e-12	-0.0339647
G3BP2	clu_35606_?	i001	chr4:75657014-75657557	0.627591	0.586414	1.21013e-13	2.37594e-12	-0.041177
G3BP2	clu_35606_?	i002	chr4:75657014-75658843	0.00172041	0.00175215	1.21013e-13	2.37594e-12	3.17428e-05
G3BP2	clu_35606_?	i003	chr4:75657730-75658843	0.370688	0.411834	1.21013e-13	2.37594e-12	0.0411453
STRBP	clu_2251_?	i001	chr9:123136515-123139529	0.541557	0.605322	1.29917e-13	2.54182e-12	0.0637653
STRBP	clu_2251_?	i002	chr9:123136515-123146855	0.028554	0.0326094	1.29917e-13	2.54182e-12	0.00405539
STRBP	clu_2251_?	i003	chr9:123139687-123146855	0.429889	0.362069	1.29917e-13	2.54182e-12	-0.0678207
CCT4	clu_12030_?	i001	chr2:61885072-61888381	0.554368	0.426724	1.30529e-13	2.54486e-12	-0.127644
CCT4	clu_12030_?	i002	chr2:61888254-61888381	0.0132402	0.0170317	1.30529e-13	2.54486e-12	0.00379149
CCT4	clu_12030_?	i003	chr2:61888257-61888381	0.432392	0.556244	1.30529e-13	2.54486e-12	0.123852
PNPT1	clu_11921_?	i001	chr2:55672046-55672893	0.703629	0.638274	1.34407e-13	2.61134e-12	-0.0653549
PNPT1	clu_11921_?	i002	chr2:55672046-55679682	0.00211076	0.00186785	1.34407e-13	2.61134e-12	-0.000242911
PNPT1	clu_11921_?	i003	chr2:55673079-55679682	0.29426	0.359858	1.34407e-13	2.61134e-12	0.0655978
TSTD1	clu_41261_?	i001	chr1:161038075-161038551	0.386796	0.484813	1.63888e-13	3.17306e-12	0.0980168
TSTD1	clu_41261_?	i002	chr1:161038075-161038880	0.480947	0.413552	1.63888e-13	3.17306e-12	-0.0673951
TSTD1	clu_41261_?	i003	chr1:161038634-161038880	0.0173931	0.0151205	1.63888e-13	3.17306e-12	-0.00227261
TSTD1	clu_41261_?	i004	chr1:161038673-161038880	0.114864	0.0865148	1.63888e-13	3.17306e-12	-0.0283491
TXLNA	clu_38310_?	i001	chr1:32179776-32180314	0.144386	0.0785871	1.93761e-13	3.73845e-12	-0.0657985
TXLNA	clu_38310_?	i002	chr1:32179776-32181242	0.0472758	0.0391055	1.93761e-13	3.73845e-12	-0.0081703
TXLNA	clu_38310_?	i003	chr1:32180514-32181242	0.808339	0.882307	1.93761e-13	3.73845e-12	0.0739688
MAGOH	clu_39230_?	i001	chr1:53227144-53228872	0.794279	0.774712	2.08921e-13	4.01705e-12	-0.0195675
MAGOH	clu_39230_?	i002	chr1:53227144-53233542	0.00150971	0.0017774	2.08921e-13	4.01705e-12	0.000267682
MAGOH	clu_39230_?	i003	chr1:53227144-53235577	0.00140269	0.00165314	2.08921e-13	4.01705e-12	0.000250452
MAGOH	clu_39230_?	i004	chr1:53228954-53233542	0.133922	0.144044	2.08921e-13	4.01705e-12	0.010122
MAGOH	clu_39230_?	i005	chr1:53228954-53235577	0.0463378	0.0551387	2.08921e-13	4.01705e-12	0.00880087
MAGOH	clu_39230_?	i006	chr1:53233652-53235577	0.022548	0.0226745	2.08921e-13	4.01705e-12	0.000126515
R3HDM1	clu_13339_?	i001	chr2:135602708-135604806	0.244535	0.285577	2.40293e-13	4.60437e-12	0.0410417
R3HDM1	clu_13339_?	i002	chr2:135602708-135621494	0.00184332	0.00171813	2.40293e-13	4.60437e-12	-0.000125189
R3HDM1	clu_13339_?	i003	chr2:135605016-135616152	0.0292425	0.0352204	2.40293e-13	4.60437e-12	0.00597791
R3HDM1	clu_13339_?	i004	chr2:135605016-135616668	0.27233	0.267413	2.40293e-13	4.60437e-12	-0.00491767
R3HDM1	clu_13339_?	i005	chr2:135605016-135621494	0.243606	0.226745	2.40293e-13	4.60437e-12	-0.0168612
R3HDM1	clu_13339_?	i006	chr2:135614772-135616152	0.00257595	0.00176909	2.40293e-13	4.60437e-12	-0.000806856
R3HDM1	clu_13339_?	i007	chr2:135616193-135616668	0.0382138	0.0377772	2.40293e-13	4.60437e-12	-0.000436592
R3HDM1	clu_13339_?	i008	chr2:135616757-135619525	0.00425807	0.00496392	2.40293e-13	4.60437e-12	0.000705848
R3HDM1	clu_13339_?	i009	chr2:135616757-135621494	0.159849	0.134912	2.40293e-13	4.60437e-12	-0.0249372
R3HDM1	clu_13339_?	i010	chr2:135619686-135621494	0.00354542	0.00390459	2.40293e-13	4.60437e-12	0.000359168
TRAPPC3	clu_38532_?	i001	chr1:36137316-36137796	0.00199645	0.00127517	2.8946e-13	5.52749e-12	-0.000721279
TRAPPC3	clu_38532_?	i002	chr1:36137322-36137796	0.765414	0.824095	2.8946e-13	5.52749e-12	0.0586803
TRAPPC3	clu_38532_?	i003	chr1:36137322-36149092	0.00188539	0.00128428	2.8946e-13	5.52749e-12	-0.000601105
TRAPPC3	clu_38532_?	i004	chr1:36137322-36149337	0.0175848	0.0190129	2.8946e-13	5.52749e-12	0.0014281
TRAPPC3	clu_38532_?	i005	chr1:36137978-36139720	0.116648	0.0927432	2.8946e-13	5.52749e-12	-0.0239048
TRAPPC3	clu_38532_?	i006	chr1:36137978-36149337	0.00109072	0.00119308	2.8946e-13	5.52749e-12	0.00010236
TRAPPC3	clu_38532_?	i007	chr1:36140166-36149092	0.0147663	0.00966576	2.8946e-13	5.52749e-12	-0.00510056
TRAPPC3	clu_38532_?	i008	chr1:36140166-36149337	0.0806139	0.0507309	2.8946e-13	5.52749e-12	-0.029883
WRN	clu_16472_?	i001	chr8:31033973-31044063	0.00252054	0.00348634	2.99498e-13	5.69966e-12	0.000965798
WRN	clu_16472_?	i002	chr8:31033973-31058372	0.56957	0.434827	2.99498e-13	5.69966e-12	-0.134742
WRN	clu_16472_?	i003	chr8:31033973-31058383	0.0129576	0.0108607	2.99498e-13	5.69966e-12	-0.00209692
WRN	clu_16472_?	i004	chr8:31033973-31080867	0.00307221	0.0035421	2.99498e-13	5.69966e-12	0.000469891
WRN	clu_16472_?	i005	chr8:31044184-31058372	0.0021451	0.00194319	2.99498e-13	5.69966e-12	-0.000201911
WRN	clu_16472_?	i006	chr8:31068327-31076173	0.0802543	0.130794	2.99498e-13	5.69966e-12	0.0505397
WRN	clu_16472_?	i007	chr8:31068327-31080867	0.00495877	0.000779786	2.99498e-13	5.69966e-12	-0.00417898
WRN	clu_16472_?	i008	chr8:31076287-31080867	0.324522	0.413767	2.99498e-13	5.69966e-12	0.0892448
PHF20	clu_47711_?	i001	chr20:35871829-35899370	0.296814	0.400271	3.22201e-13	6.11087e-12	0.103458
PHF20	clu_47711_?	i002	chr20:35871829-35913249	0.0331536	0.0331404	3.22201e-13	6.11087e-12	-1.31753e-05
PHF20	clu_47711_?	i003	chr20:35899648-35913249	0.670033	0.566588	3.22201e-13	6.11087e-12	-0.103445
NIT2	clu_59747_?	i001	chr3:100334798-100339087	0.261338	0.198136	3.32186e-13	6.27888e-12	-0.0632018
NIT2	clu_59747_?	i002	chr3:100334798-100339815	0.00540747	0.00670083	3.32186e-13	6.27888e-12	0.00129336
NIT2	clu_59747_?	i003	chr3:100334798-100348803	0.00698152	0.00531336	3.32186e-13	6.27888e-12	-0.00166817
NIT2	clu_59747_?	i004	chr3:100335112-100339087	0.00248954	0.0085379	3.32186e-13	6.27888e-12	0.00604836
[truncated: 25,150 more rows]
